# Supplementary material for: Wave and Tidal Energy: A Patent Landscape Study
Source: Preprints.org preprint supplement (doi:10.20944/preprints202409.0921.v1), 2024-09-11
Supplement: Supplementary file 1 [file tidal-patent.xlsx]

## Sheet: Sheet1
Index	Patent Type	Patent Number	Title	Applicant	Assignee	Application Number	Abstract	Description Classification	Main Classification	International Patent Classification	Priority Date	Application Date	Publication Date	Unique Document Identifier	ER
1	P	CN204851521-U	Tidal energy power generation machine variable pitch bearing, has rolling body provided with large rolling body and small rolling body, and gear ring whose front end surface is fixed with blade that is connected with flange.	DONG L	GUODIAN UNITED POWER TECHNOLOGY CO LTD (CGUO-C)	2015820530	NOVELTY - This new utility model claims of one of tidal power generation unit and the variable pitch bearing, the variable pitch bearing comprises inner ring, outside ring, and inside ring and outside ring is set between the rolling body, wherein, the inner circle is set with variable pitch gear and gear ring, the gear ring at front end surface fixed with blade connected with flange, after the ou…	Q54 (Non-positive displacement fluid engines (i.e. driven by fluid); Miscellaneous motors and machines for producing mechanical power/thrust (F03B,D,G,H)); X11 (Power Generation and High Power Machines); X15 (Non-Fossil Fuel Power Generating Systems)	Q54-X; X11-B01; X11-B10; X11-J05; X15-C02	F03B-011/06; F03B-015/00; F03B-003/14	CN204851521-U 09 Dec 2015 F03B-011/06 201601 Pages: 9 English	CN204851521-U CN20469816 02 Jul 2015	CN20469816 02 Jul 2015	DIIDW:2015820530
2	P	CN204591586-U	Combined power generation equipment for tidal energy turbine, has tower tube that is formed with high strength carbon fiber composite material, and connecting shaft that is connected with wheel hub mounted with water turbine blade.	HUANG C	POWERCHINA ZHONGNAN ENG CO LTD (CNPW-C)	201563299Y	NOVELTY - This new utility model claims of a kind of fan and one horizontal shaft tide can water wheel engine combined power generation device, comprising a fan, the fan comprises tower tube, tower tube installed with top of fan hub and cabin, a fan wheel installed with fan blade, fan blade and tower tube material is high strength carbon fiber composite material, lower tower tube end and power ge…	A88 (Mechanical engineering and tools e.g. valves, gears and conveyor belts.); Q54 (Non-positive displacement fluid engines (i.e. driven by fluid); Miscellaneous motors and machines for producing mechanical power/thrust (F03B,D,G,H)); X11 (Power Generation and High Power Machines); X15 (Non-Fossil Fuel Power Generating Systems)	A05-A01E; A12-H; X11-B01; X15-B01A; X15-C01; X15-C02B	F03B-013/12; F03B-003/12; F03D-011/00; F03D-009/00	CN204591586-U 26 Aug 2015 F03D-009/00 201572 Chinese	CN204591586-U CN20281268 05 May 2015	CN20281268 05 May 2015	DIIDW:201563299Y
3	P	CN105155490-A	Tidal power generation floating gate device for use in coastal tide boundary, has horizontal tide generator fixed with upper and lower moving floating gate units to perform electric power switching operation.	LOU B	NANJING ZHUANCHUANG INTELLECTUAL PROPERT (NANJ-Non-standard)	201583111Y	NOVELTY - The device has a horizontal tide generator fixed with upper and lower moving floating gate units. The upper and lower moving floating gate units perform electric power switching operation. The upper and lower moving floating gate units generate tidal energy to perform power generating operation. A seawater buoyancy close gate is connected with the upper and lower moving floating gate un…	Q42 (Hydraulic engineering, soil shifting and sewerage (E02, 3)); X15 (Non-Fossil Fuel Power Generating Systems)	Q42-A03; X15-C02	E02B-009/08	CN105155490-A 16 Dec 2015 E02B-009/08 201604 Pages: 6 English	CN105155490-A CN10226047 26 May 2014	CN10226047 26 May 2014	DIIDW:201583111Y
4	P	CN103214063-A; CN103214063-B	Sea water desalting device comprises pre-filter device, energy collecting device, water storage tank, reverse osmosis device, programmable logic controller and recycling device.	CHEN J	UNIV ZHEJIANG NINGBO TECHNOLOGY INST (NBLG-C)	2013T69792	NOVELTY - The sea water desalting device comprises a pre-filter device, an energy collecting device, a water storage tank, a reverse osmosis device, a controller (programmable logic controller) and a recycling device. The pre-filter device, the energy collecting device, the water storage tank and the reverse osmosis device are sequentially connected through a pipeline. The controller is connected…	D15 (Chemical or biological treatment of water, industrial waste and sewage - including purification, sterilising or testing water, scale prevention, treatment of sewage sludge, regeneration of active carbon which has been used for water treatment and impregnating water with gas e.g. CO2, but excluding plant and anti-pollution devices (C02).); T01 (Digital Computers); X25 (Industrial Electric Equ…	D04-A01E; D04-B07F; T01-F06; X25-H03; X25-W04	C02F-001/44	CN103214063-A 24 Jul 2013 C02F-001/44 201374 Pages: 10 Chinese	CN103214063-A CN10116997 03 Apr 2013	CN10116997 03 Apr 2013	DIIDW:2013T69792
5	P	CN218206903-U	Tidal energy wave energy generating device, has cylindrical tube whose top inner cavity is connected with linear motor through piston connecting rod structure for driving linear motor to generate electricity.	FU Y	MA K (MAKK-Individual)	202305914U	NOVELTY - The utility model claims a tidal wave energy generating device, comprising a floating body, a cylindrical tube and a linear motor, the cylindrical tube passes through the central part of the upper surface of the floating body, and is fixedly connected with the floating body, the linear motor is set above the cylindrical tube, and fixedly connected with the upper surface of the floating …	Q54 (Non-positive displacement fluid engines (i.e. driven by fluid); Miscellaneous motors and machines for producing mechanical power/thrust (F03B,D,G,H)); X15 (Non-Fossil Fuel Power Generating Systems); X11 (Power Generation and High Power Machines)	Q54-X; X15-C01; X15-C02; X11-B; X11-H02	F03B-013/24; F03B-013/26; H02K-041/03	CN218206903-U 03 Jan 2023 F03B-013/24 202305 Chinese	CN218206903-U CN21508418 16 Jun 2022	CN21508418 16 Jun 2022	DIIDW:202305914U
6	P	CN215890304-U	Power flow energy generating device for ship, has generating device mounting platform whose bottom wall is provided with switching platform, where supporting base and switching platform are rotatably connected by rotary supporting bearing.	CHEN B	NANJING HIGH ACCURATE MARINE EQUIP CO LT (NANJ-Non-standard)	2022351039	NOVELTY - The utility model is suitable for the technical field of ship, claims a tide energy generating device capable of integrally rotating, comprising a generating device mounting platform, the top wall of the generating device mounting platform is equipped with a generating device box body, the inner part of the generating device box body is equipped with a generator, the output shaft of the…	Q54 (Non-positive displacement fluid engines (i.e. driven by fluid); Miscellaneous motors and machines for producing mechanical power/thrust (F03B,D,G,H)); X15 (Non-Fossil Fuel Power Generating Systems)	Q54-X; X15-C02; X15-C01	F03B-011/00; F03B-013/14; F03B-013/26	CN215890304-U 22 Feb 2022 F03B-013/14 202224 Chinese	CN215890304-U CN23171450 23 Dec 2020	CN23171450 23 Dec 2020	DIIDW:2022351039
7	P	CN209386303-U	Coastal shell type rubbish grinding device for rubbish processing device, has grinding piece inserted on grinding box that is hinged with end of connecting rod, where connecting rod and grinding box are arranged on grinding piece.	WANG D	MNR OCEANOGRAPHY SECOND INST (GJHY-C)	2019809872	NOVELTY - The utility model claims a shell type for coastal garbage grinding device and garbage processing device, relates to garbage treatment technology field, sea shell type garbage grinding device provided by the utility model, comprising a frame, a tide blade, a first connecting rod, grinding part and a grinding box, tide blade glidingly connected with the machine frame, a grinding box is co…	P41 (Crushing: centrifuging, separating solids (B02, B03, B04).); Q73 (Combustion equipment/processes (F23))	P41-A03; P41-A05; P41-E06; P41-U20; Q73-A05; Q73-U20	B02C-023/16; B02C-004/10; B02C-004/42; F23G-005/033; F23G-005/10; F23G-005/44	CN209386303-U 13 Sep 2019 F23G-005/033 201972 Pages: 16 Chinese	CN209386303-U CN21867586 13 Nov 2018	CN21867586 13 Nov 2018	DIIDW:2019809872
8	P	EP2712800-A1; WO2014049034-A1; CA2884782-A1; EP2712800-B1	Floating object for fixation on anchor on seabed has upper mooring line section that extends though guide while upper end of upper mooring line section is secured to floating object.	GANZINGA W S	BLUEWATER ENERGY SERVICES BV (BENS-C)	2014F82678	NOVELTY - The floating object has a mooring line (9) having a relatively long main mooring line section (9b) made of a material having a relatively low axial stiffness. A relatively short upper mooring line section (9a) is made of a synthetic material having a relatively high axial stiffness. The lower end of main mooring line section is secured to anchor and upper end of main mooring line sectio…	A95 (Transport - including vehicle parts, tyres and armaments.); H01 (Obtaining crude oil and natural gas - including exploration, drilling, well completion, production and treatment. General off-shore platform and drilling technology is included together with the treatment of tar sands and oil shales (C10G, E21B).)	A12-T; H01-B01	B63B-021/20	EP2712800-A1 02 Apr 2014 B63B-021/20 201426 Pages: 11 English	EP2712800-A1 EP186678 28 Sep 2012	EP186678 28 Sep 2012	DIIDW:2014F82678
9	P	CN111639400-A	Dedicated airfoil design method for horizontal-axis tidal current energy turbine blades, involves using an optimization algorithm based on a proxy model, according to the operating conditions and performance requirements.	CHEN S	UNIV SOUTHERN SCI & TECHNOLOGY (USOU-C)	202089473F	NOVELTY - The method involves using an optimization algorithm based on a proxy model, according to the operating conditions and performance requirements of the horizontal-axis tidal current energy turbine blades. Based on preset parameters, the lift-drag ratio in the full angle of attack is taken as the objective function, and the airfoil thickness, cavitation characteristics and stall characteri…	T01 (Digital Computers)	T01-J15X	G06F-119/14; G06F-030/17; G06F-030/20	CN111639400-A 08 Sep 2020 G06F-030/17 202079 Pages: 11 Chinese	CN111639400-A CN10388659 09 May 2020	CN10388659 09 May 2020	DIIDW:202089473F
10	P	CN201925081-U	Tide generator, has door blade inserted in groove through top part of door frame, driving gear arranged at upper part of main shaft, frames fixedly connected with periphery of profile rack, and driven gear connected with generator.	SUN X	SUN K (SUNK-Individual)	2011K99178	NOVELTY - The generator has a main shaft whose lower part is hinged with a profile rack for mounting a blade. Vertical frames are fixedly connected with periphery of the profile rack. The frame is hinged with a door frame. Grooves are formed at a left side, a right side and a lower side of the door frame. The door blade is inserted in the groove through a top part of the door frame. A driving gea…	A88 (Mechanical engineering and tools e.g. valves, gears and conveyor belts.); Q54 (Non-positive displacement fluid engines (i.e. driven by fluid); Miscellaneous motors and machines for producing mechanical power/thrust (F03B,D,G,H)); X15 (Non-Fossil Fuel Power Generating Systems)	A12-H; X15-C02	F03B-013/26	CN201925081-U 10 Aug 2011 F03B-013/26 201160 Pages: 7 Chinese	CN201925081-U CN20688000 29 Dec 2010	CN20688000 29 Dec 2010	DIIDW:2011K99178
11	P	CN116677550-A	Tidal power generation mechanism for use in sea-blocking dam along coast of civil engineering to form reservoir, has cleaning assembly is arranged on one side of fixing plate and comprises cleaning piece, connecting piece and transmission piece.	REN S	HUBEI CHAOXINENG TECHNOLOGY SERVICE CO (HUBE-Non-standard)	2023A0444Q	NOVELTY - The mechanism has a power generation assembly (100) comprises a fixed plate (101), a power generator (102), a rotating unit, a swinging unit (104) and a reversing unit. The power generator is arranged on one side of the fixed plate, the rotating unit is positioned on the fixed plate, the swinging unit is arranged on one side of the fixed plate, and the reversing unit is positioned on th…	Q54 (Non-positive displacement fluid engines (i.e. driven by fluid); Miscellaneous motors and machines for producing mechanical power/thrust (F03B,D,G,H)); X15 (Non-Fossil Fuel Power Generating Systems); X11 (Power Generation and High Power Machines)	Q54-X; X15-C02; X11-B01	F03B-011/08; F03B-013/26	CN116677550-A 01 Sep 2023 F03B-013/26 202382 Chinese	CN116677550-A CN10837788 07 Jul 2023	CN10837788 07 Jul 2023	DIIDW:2023A0444Q
12	P	CN116066285-A	Sea wave generating device has float that is located between two wave guides, where one end of main shaft is connected with output gear, and other end of main shaft is connected with rotating shaft in generator.	LIN H	CHINA WATER RESOURCES BEIFANG INVESTIGAT (CHWA-Non-standard)	202351343P	NOVELTY - The device has a motion converter (6), a generator (7) and a spring that are arranged in the machine room. The floating ball (1) and the wave guide plate (10) are arranged on the facing surface of the seawall, and the floating ball is a hollow ball. Two wave guide plates are laid along the slope direction of the facing surface of the seawall. The float is located between the two wave gu…	Q54 (Non-positive displacement fluid engines (i.e. driven by fluid); Miscellaneous motors and machines for producing mechanical power/thrust (F03B,D,G,H)); V06 (Electromechanical Transducers and Small Machines); X15 (Non-Fossil Fuel Power Generating Systems); X11 (Power Generation and High Power Machines)	Q54-X; V06-M10; X15-C01; X15-C02; X11-B; X11-J05A; X11-J05B	F03B-013/18; F03B-013/26; H02K-007/116; H02K-007/18	CN116066285-A 05 May 2023 F03B-013/18 202344 Chinese	CN116066285-A CN10174905 27 Feb 2023	CN10174905 27 Feb 2023	DIIDW:202351343P
13	P	WO2021248369-A1	Total forming platform of large power flow energy generating device, has two stress supporting pieces whose one end is mounted on left and right sides of horizontal shaft hydraulic generator along water flow direction.	LIN D	HANGZHOU LHD INST NEW ENERGY LLC (HANG-Non-standard)	2022167121	NOVELTY - The total forming platform (1) has four fixing piles (11) integrally connected by a bracket (14) and surrounding to form a mounting space (15). A horizontal shaft hydraulic generator (2) is installed in the mounting space, where one end of each fixing pile is fixed on a seabed, and the other end extends above a water surface. Two stress blocking pieces (12) are respectively fixed on the…	Q42 (Hydraulic engineering, soil shifting and sewerage (E02, 3)); Q54 (Non-positive displacement fluid engines (i.e. driven by fluid); Miscellaneous motors and machines for producing mechanical power/thrust (F03B,D,G,H)); X15 (Non-Fossil Fuel Power Generating Systems)	Q42-A03; Q42-A10; Q54-X; X15-C02	F03B-013/26; F03B-011/00; E02B-009/08; E02B-017/00	WO2021248369-A1 16 Dec 2021 F03B-013/26 202212 Pages: 46 Chinese	WO2021248369-A1 WOCN095387 10 Jun 2020	WOCN095387 10 Jun 2020	DIIDW:2022167121
14	P	CN111288029-A; CN111288029-B	Brake hydraulic control system, has first one-way valve connected with first two-position three-way electromagnetic directional valve, and second one-way valve connected with second two-position three-way electromagnetic directional valve.	RUAN C	WUHAN MARINE MACHINERY PLANT CO LTD (CSHI-C)	202056439H	NOVELTY - The system has an output pump (102) whose input end is communicated with an oil tank (101). An output end of the output pump is communicated with a port of first two-position three-way electromagnetic directional valve (103) and port of second two-position three-way electromagnetic directional valve (104). The first two-position three-way electromagnetic directional valve is communicate…	Q54 (Non-positive displacement fluid engines (i.e. driven by fluid); Miscellaneous motors and machines for producing mechanical power/thrust (F03B,D,G,H)); Q57 (Fluid-pressure actuators; hydraulic/pneumatics in general (F15)); V06 (Electromechanical Transducers and Small Machines); X13 (Switchgear, Protection, Electric Drives)	Q54-X; Q57-B; Q57-X; V06-N06; X13-H01B	F03B-015/00; F15B-001/02; F15B-011/16; F15B-013/06; H02P-003/02	CN111288029-A 16 Jun 2020 F15B-001/02 202054 Pages: 9 Chinese	CN111288029-A CN10073572 22 Jan 2020	CN10073572 22 Jan 2020	DIIDW:202056439H
15	P	CN115977860-A; CN219242088-U	Hydraulic control system for sea wave power generating set, has tide generating set connected with external power floater through tide generating control unit to drive set to generate electricity by using rising and falling tide power.	LI J	CHENGDU MINRUIKE TECHNOLOGY CO LTD (CHEN-Non-standard)	2023504902	NOVELTY - The system has a tide power generation control unit (1) whose oil liquid conveying end is connected with a hydraulic station (2). A tide generating set is connected with an external power floater through the tide generating control unit to drive the tide generating set to generate electricity by using rising and falling tide power of ocean wave under cooperation of the tide generating c…	Q54 (Non-positive displacement fluid engines (i.e. driven by fluid); Miscellaneous motors and machines for producing mechanical power/thrust (F03B,D,G,H)); X15 (Non-Fossil Fuel Power Generating Systems); X11 (Power Generation and High Power Machines)	Q54-X; X15-C01; X15-C02; X15-C03; X11-B10	F03B-013/12; F03B-015/00; F15B-001/04; F15B-011/16; F15B-013/02	CN115977860-A 18 Apr 2023 F03B-015/00 202339 Chinese	CN115977860-A CN10032474 10 Jan 2023	CN10032474 10 Jan 2023	DIIDW:2023504902
16	P	CN206830366-U	Full stroke pump, has cylinder body provided with first water discharging pipe and suction pipe, where first water discharging pipe is provided with drain valve and suction pipe is provided with suction valve.	HU M	HU M (HUMM-Individual)	201802490R	NOVELTY - The utility model claims a full stroke pumping, wherein it is composed of a cylinder body, a piston, a lifting ship, a push rod, a supporting frame, a suction valve, suction valve II, a drain valve, a drain valve II, suction pipe, suction pipe II. drain pipe I and pipe II; the cylinder body is filled with water, through the supporting frame and the fixed cylinder body, the piston is con…	Q54 (Non-positive displacement fluid engines (i.e. driven by fluid); Miscellaneous motors and machines for producing mechanical power/thrust (F03B,D,G,H)); X15 (Non-Fossil Fuel Power Generating Systems)	Q54-X; X15-C02	F03B-013/26; F04B-049/22	CN206830366-U 02 Jan 2018 F03B-013/26 201809 Pages: 5 Chinese	CN206830366-U CN20679258 13 Jun 2017	CN20679258 13 Jun 2017	DIIDW:201802490R
17	P	CN201221433-Y	Bidirectional six-mode tide set, has main body installed on large dam between reservoir and seawater through tubular seat, and rotor placed in main body and provided with engine starting winding.	CHEN K	HANGZHOU INST MECHANICAL DESIGN MIN WATER RESOURCES (HANG-Non-standard)	2009H73574	NOVELTY - The set has a main body installed on a large dam (13) between a reservoir and seawater through a tubular seat (6) and located in a flow passage. A front end of the main body is provided with a water wheel (2). A rotor (9) is placed in the main body, and the water wheel is connected with an electric machine through a main shaft (3). The flow passage is provided with a water guide mechani…	Q42 (Hydraulic engineering, soil shifting and sewerage (E02, 3)); Q54 (Non-positive displacement fluid engines (i.e. driven by fluid); Miscellaneous motors and machines for producing mechanical power/thrust (F03B,D,G,H)); X11 (Power Generation and High Power Machines)	X11-B01	E02B-009/00; F03B-011/00; F03B-013/26	CN201221433-Y 15 Apr 2009 F03B-013/26 200930 Pages: 8 Chinese	CN201221433-Y CN20120494 03 Jul 2008	CN20120494 03 Jul 2008	DIIDW:2009H73574
18	P	CN205841087-U	Tidal energy based dam-free ocean current power generation device, has rotating shaft whose external end is connected with water-proof generator by worm wheel, and worm speed reducer connected with upper part of main transmission shaft.	ZHANG H	ZHANG H (ZHAN-Individual)	201701885U	NOVELTY - The purpose of the utility model is to provide a dam-free sea tide flow has simple structure, will not cause ecological damage, easy to move, convenient to maintain energy generating device, comprising a water-proof generator and grid frame; in the four blank of the latticed frame is horizontally fixed with a supporting rod, the middle part of each supporting rod is mounted with a main …	Q54 (Non-positive displacement fluid engines (i.e. driven by fluid); Miscellaneous motors and machines for producing mechanical power/thrust (F03B,D,G,H)); X11 (Power Generation and High Power Machines); X15 (Non-Fossil Fuel Power Generating Systems)	Q54-X; X11-B; X11-J05; X15-C02	F03B-013/26	CN205841087-U 28 Dec 2016 F03B-013/26 201705 Pages: 7 Chinese	CN205841087-U CN20546694 08 Jun 2016	CN20546694 08 Jun 2016	DIIDW:201701885U
19	P	CN112628063-A	Device for generating power from water surface, comprises gear portion installed in upper portion of main body portion, where middle portion of main body portion is connected with rope portion and gear portion.	SHANG Y	SHANG Y (SHAN-Individual)	2021404207	NOVELTY - The device comprises a main body portion (1) whose lower half portion is placed in water. An upper portion of the main body portion floats on a water surface. The upper portion and the lower portion of the main body portion are connected through a rope portion. The rope portion is installed in the upper portion of the main body portion. A gear portion is installed in the upper portion o…	Q36 (Handling thin materials (B65H)); Q54 (Non-positive displacement fluid engines (i.e. driven by fluid); Miscellaneous motors and machines for producing mechanical power/thrust (F03B,D,G,H)); Q64 (Belts, chains, gearing (F16G,H)); X11 (Power Generation and High Power Machines);	Q36-E; Q54-X; Q64-C01; X11-B; X11-J05B; X15-C02	B65H-075/48; F03B-013/26; F16H-001/22; H02K-007/18	CN112628063-A 09 Apr 2021 F03B-013/26 202135 Pages: 18 Chinese	CN112628063-A CN11511633 18 Dec 2020	CN11511633 18 Dec 2020	DIIDW:2021404207
20	P	CN208106640-U	Suspending water conservancy power generating and storing device, has balance rope whose lower end is connected with balance rope and gear, and balancer whose outer surface is connected with lower end of lifting rope.	XIAO H	QUANZHOU HONGGANG COMMUNICATION EQUIP CO (QUAN-Non-standard)	2018941506	NOVELTY - The utility model claims a suspending water conservancy power generating and storing device, its structure comprises a generator, a mechanical actuator, a belt pulley, an upper platform, an adjusting device, a supporting frame, a base, a lower beam, a pulley, a floater, a rope, a connecting bolt, a supporting table, the generator is provided with a mechanical driver, the adjusting devic…	Q54 (Non-positive displacement fluid engines (i.e. driven by fluid); Miscellaneous motors and machines for producing mechanical power/thrust (F03B,D,G,H)); X11 (Power Generation and High Power Machines); X15 (Non-Fossil Fuel Power Generating Systems)	Q54-X; X11-B01; X15-C02	F03B-011/00; F03B-013/26	CN208106640-U 16 Nov 2018 F03B-013/26 201880 Pages: 7 Chinese	CN208106640-U CN20583361 22 Apr 2018	CN20583361 22 Apr 2018	DIIDW:2018941506
21	P	CN104847569-A; CN104847569-B	High-efficient bi-directional flow rectangular tidal turbine blade, has torque compensation device connected with blade trailing edge that is fixed between blade root and leaf tip seat, and pitch blade provided with compensation device.	DAI Z	SHENYANG WIND POWER ENERGY EQUIP CO LTD (SHEN-Non-standard)	201562648P	NOVELTY - The blade has an original blade rotating shaft seat (3) for adjusting an optimized blade rotating shaft seat (2) to move a blade front edge (5). A blade standard section (7) is utilized for adjusting a position of the optimized blade rotating shaft seat along a chord line direction. An optimize root edge (1) is utilized for determining extra torque. An automatic variable pitch blade is …	Q54 (Non-positive displacement fluid engines (i.e. driven by fluid); Miscellaneous motors and machines for producing mechanical power/thrust (F03B,D,G,H)); X15 (Non-Fossil Fuel Power Generating Systems)	X15-C02B	F03B-013/26; F03B-003/12	CN104847569-A 19 Aug 2015 F03B-003/12 201572 Pages: 5 Chinese	CN104847569-A CN10228893 08 May 2015	CN10228893 08 May 2015	DIIDW:201562648P
22	P	CN220839983-U	Pin pulling-out device for use in production tool, has fixing plate provided with avoiding hole for avoiding pipeline, where sides of through hole of fixing plate are respectively provided with stress part for connecting with device.	GU Y	THREE GORGES NEW ENERGY OFFSHORE WIND (THRE-Non-standard)	202445572H	NOVELTY - The utility model provides a pin pulling-out device, belonging to the technical field of production tool, comprising: a fixing plate for pulling out the pin, the fixing plate is provided with an avoiding hole for avoiding the pipeline, one side of the avoiding hole is opened; two sides of the avoiding hole are respectively provided with a through hole, the through hole is suitable for p…	P62 (Hand tools, cutting (B25, B26).)	P62-A05	B25B-027/02	CN220839983-U 26 Apr 2024 B25B-027/02 202438 Chinese	CN220839983-U CN22699968 09 Oct 2023	CN22699968 09 Oct 2023	DIIDW:202445572H
23	P	CN214089786-U	Water surface rubbish collector, has connecting seat whose adjacent groups are connected with floating foam ball, where floating foam ball and protective net are fixedly connected with rope, and chain whose bottom end is connected with weight block.	WANG Y	SHANGHAI YUPAI ENERGY SAVING ENG CO LTD (SHAN-Non-standard)	2021A4736D	NOVELTY - The utility model claims a water surface rubbish collector based on tide energy, belonging to the technical field of water surface rubbish, wherein the front of the storage battery is provided with a servo motor fixed at the bottom of the inner cavity of the protection box; the output end of the servo motor fixedly connected with speed reducer; the output end of the speed reducer is fix…	Q42 (Hydraulic engineering, soil shifting and sewerage (E02, 3)); Q54 (Non-positive displacement fluid engines (i.e. driven by fluid); Miscellaneous motors and machines for producing mechanical power/thrust (F03B,D,G,H)); X15 (Non-Fossil Fuel Power Generating Systems)	Q42-A10; Q54-X; X15-C02	E02B-015/10; F03B-013/26	CN214089786-U 31 Aug 2021 E02B-015/10 202175 Pages: 8 Chinese	CN214089786-U CN23027244 16 Dec 2020	CN23027244 16 Dec 2020	DIIDW:2021A4736D
24	P	CN110778446-A	Wave energy generating device, has generator fixed in generator mounting shells, second hinge rod hinged with end of first hinge rod, battery provided on floating body, where battery is electrically connected to generator.	LI H	UNIV ZHEJIANG OCEAN (UYZO-C)	202015660A	NOVELTY - The device has a fixing rod (23) whose end is fixed on an outer wall of a guide sleeve (2). Another end of the fixing rod is articulated with an end of a first hinge rod (24) that rotates up and down around a first hinge (231). A generator mounting shell (3) is slid back and forth on an inner wall of the guide sleeve. A generator (32) is fixed in the generator mounting shell. An impelle…	Q54 (Non-positive displacement fluid engines (i.e. driven by fluid); Miscellaneous motors and machines for producing mechanical power/thrust (F03B,D,G,H)); X15 (Non-Fossil Fuel Power Generating Systems)	Q54-X; X15-C01; X15-C02	F03B-013/16; F03B-013/22; F03B-013/26	CN110778446-A 11 Feb 2020 F03B-013/22 202018 Pages: 13 Chinese	CN110778446-A CN11227860 04 Dec 2019	CN11227860 04 Dec 2019	DIIDW:202015660A
25	P	CN201810470-U	Combination device for generating electricity, has energy obtaining unit provided with air storage tank floated on sea level and cylinder fixed in tank, and steam turbine and generator that are fixed on upper end of air storage tank.	YANG J	CHINA ACAD MACHINERY SCI & TECHNOLOGY AD (ZZRI-C)	2011F76859	NOVELTY - The device has a T-shaped frame welded in a U-shaped frame and fixed with an impeller that is provided with a soft shaft whose two ends are connected with the impeller and an acceleration transmission device, respectively. An energy obtaining unit is provided with an air storage tank floated on a sea level and a cylinder fixed in the tank. An inner side of the cylinder is provided with …	Q54 (Non-positive displacement fluid engines (i.e. driven by fluid); Miscellaneous motors and machines for producing mechanical power/thrust (F03B,D,G,H)); X15 (Non-Fossil Fuel Power Generating Systems)	X15-C01; X15-C02	F03B-013/22; F03B-013/26	CN201810470-U 27 Apr 2011 F03B-013/22 201141 Pages: 6 Chinese	CN201810470-U CN20148051 02 Apr 2010	CN20148051 02 Apr 2010	DIIDW:2011F76859
26	P	JP2003129932-A	Power generation method using water turbine, involves operating generators attached to rotary shaft of drive and driven rollers of conveyor to which buckets are attached.	FUJIOKA K	FUJIOKA K (FUJI-Individual)	2003817897	NOVELTY - Several buckets (1) are attached to a conveyor (7) provided with drive and driven rollers (6,2). Flow of water into the buckets and draining of water from the buckets, causes rotation of the drive and driven rollers, respectively. Electricity is generated by operation of the generators attached to the rotary shaft of the rollers.	Q55 (Positive displacement fluid machines/pumps/compressors (i.e. for driving fluid) (F04B,C)); X11 (Power Generation and High Power Machines)	X11-B01	F03B-009/00	JP2003129932-A 08 May 2003 F03B-009/00 200377 Pages: 5 Japanese	JP2003129932-A JP373433 22 Oct 2001	JP373433 22 Oct 2001	DIIDW:2003817897
27	P	CN103867422-A	Flexible telescopic jar ocean tide water pumping device for ocean geographical environment, has floating cylinder whose upper part is fixed with water floating weight, and support column fixed with lower base jar.	MA J	MA Z (MAZZ-Individual)	2014Q25986	NOVELTY - The device has a bottom connecting piece and a lower buoyancy tank connected with a lower base jar that is arranged with a high pressure water outlet. A telescopic jar is connected with a flexible jar main body by a flange. A telescopic jar main body is located between two flanges. A hollow floating body assembly is arranged in a floating cylinder. An upper part of the floating cylinder…	Q55 (Positive displacement fluid machines/pumps/compressors (i.e. for driving fluid) (F04B,C))		F04B-043/08	CN103867422-A 18 Jun 2014 F04B-043/08 201456 Pages: 6 Chinese	CN103867422-A CN10077417 28 Feb 2014	CN10077417 28 Feb 2014	DIIDW:2014Q25986
28	P	CN103453707-A	Marine tide water taking cold ice freezing plant electricity-saving method, involves performing fresh water absorption process, and storing temperature reduction fresh water in heat-preservation water storage tank.	LI H	LI H (LIHH-Individual)	2014D16576	NOVELTY - The method involves fixing a triangular, square or cylindrical-shaped sleeve in a large floating platform. The large floating platform is installed between an upper bearing frame and a lower bearing frame. Fresh water absorption process is performed by using multiple cylinder sleeve pistons. Temperature of the fresh water is reduced to 6-10 degrees Celsius by using a cold energy exchang…	Q74 (Heating, ranges, ventilating (F24)); Q75 (Refrigeration, liquefaction (F25))		F24J-003/06; F25C-001/00; F25D-003/00	CN103453707-A 18 Dec 2013 F25C-001/00 201414 Pages: 4 Chinese	CN103453707-A CN10000460 04 Jan 2013	CN10000460 04 Jan 2013	DIIDW:2014D16576
29	P	KR2010130120-A; KR1089667-B1	Pumped-up power generation apparatus, has direction conversion members for changing traveling direction, and power transmission unit delivering power supplied to endless track chain to water meter, where waterway is formed between walls.	CHOI I K	CHOI I K (CHOI-Individual)	2010Q67222	NOVELTY - The apparatus has an endless track chain (30) wrapped according to multiple walls. A waterway is formed between the walls and connected to the endless track chain. Direction conversion members (10, 20) change a traveling direction, and a power transmission unit delivers power supplied to the endless track chain to a water meter (60). The endless track chain includes a fixing pin that is…	Q54 (Non-positive displacement fluid engines (i.e. driven by fluid); Miscellaneous motors and machines for producing mechanical power/thrust (F03B,D,G,H)); S02 (Engineering Instrumentation); X11 (Power Generation and High Power Machines); X15 (Non-Fossil Fuel Power Generating Systems)	S02-C02A; X11-B01; X15-C02	F03B-013/26; F03B-009/00	KR2010130120-A 10 Dec 2010 F03B-013/26 201140 Pages: 12	KR2010130120-A KR048803 02 Jun 2009	KR048803 02 Jun 2009	DIIDW:2010Q67222
30	P	CN201077775-Y	Desalting device for sea water has decontamination device which includes hyper-filtration membrane and sintering multi-hole filtration chip.	ZHOU Q	ZHOU Q (ZHOU-Individual)	2009A37571	NOVELTY - The desalting device includes the magnets formed with pole pair, which are set at the side wall of magnetic desalting machine. A water flow channel is formed in the space between pole pair. The water inlet is set at the upper end of magnetic desalting machine while the water outlet set at the lower end of magnetic desalting machine. The center of water flow channel is set with plain wat…	A97 (Miscellaneous goods not specified elsewhere - including papermaking, gramophone records, detergents, food and oil well applications.); D15 (Chemical or biological treatment of water, industrial waste and sewage - including purification, sterilising or testing water, scale prevention, treatment of sewage sludge, regeneration of active carbon which has been used for water treatment and impregn…	A12-W11A; A12-W11J; D04-A01E; D04-A01F1; D04-A01Q; D04-B07F	C02F-001/00; C02F-001/48; C02F-103/08	CN201077775-Y 25 Jun 2008 C02F-001/00 200902 Pages: 11 Chinese	CN201077775-Y CN20155487 17 Aug 2007	CN20155487 17 Aug 2007	DIIDW:2009A37571
31	P	GB2424674-A	Electrical tidal energy generating apparatus, has multiple buoyant paddles with platform which pushes paddles in direction of flow of current, where paddles are configured such that orientation of paddles is altered.	SLOCOMBE C	SLOCOMBE C (SLOC-Individual)	2006732773	NOVELTY - The apparatus has multiple buoyant paddles with a platform (10) which pushes the paddles in the direction of a flow of current and then pushed back to the platform using a powered winch. Each paddle is linked to tethers through a system of gears that is mounted along with a gearbox (9) on the platform located within tidal current. The paddles are configured in such a manner that orienta…	Q54 (Non-positive displacement fluid engines (i.e. driven by fluid); Miscellaneous motors and machines for producing mechanical power/thrust (F03B,D,G,H)); X15 (Non-Fossil Fuel Power Generating Systems)	X15-C02	F03B-013/26; F03B-017/06	GB2424674-A 04 Oct 2006 F03B-017/06 200676 Pages: 13 English	GB2424674-A GB006776 02 Apr 2005	GB006776 02 Apr 2005	DIIDW:2006732773
32	P	CN214312308-U	True water circulating sand table model of popular science ocean tidal energy power generation, has rotating rod whose other side passes through second mounting box and outer portion of water tank and is fixedly installed with cam.	YAN D	HANGZHOU NAIXIN MODEL CO LTD (HANG-Non-standard)	2021B6780M	NOVELTY - The utility model claims a true water circulating sand table model of popular science ocean tidal power generation, comprising a bottom plate and a first mounting box; the top part of the bottom plate close to one side is fixedly installed with a water tank; the inner part of the water tank is a hollow structure; the top part of the bottom plate close to the other side is fixedly instal…	P85 (Education, cryptography, adverts. (G09).); W04 (Audio/Video Recording and Systems); X15 (Non-Fossil Fuel Power Generating Systems)	P85-A05; P85-A01G; W04-W07C; X15-C02	G09B-025/02; G09B-023/18	CN214312308-U 28 Sep 2021 G09B-023/18 202184 Chinese	CN214312308-U CN20020428 06 Jan 2021	CN20020428 06 Jan 2021	DIIDW:2021B6780M
33	P	CN109140364-A; CN109140364-B	Seaside landscape lamp, has bottom plate fixed with upright post that is uniformly provided with landscape lamp, and first connecting block and second connecting block are provided with spiral spring.	LI M	UNIV ZHEJIANG TECHNOLOGY (UYZT-C)	2019053628	NOVELTY - The lamp has a bottom plate (13) fixed with an upright post. The upright post is uniformly provided with a landscape lamp (10). The upright post is fixedly provided with a supporting frame (3). An upper end of the upright post is fixed with an intermittent driving device. The intermittent driving device is provided with a cleaning device. The supporting frame is provided with a first co…	Q71 (Lighting (F21)); X26 (Lighting)	Q71-A01; X26-D03; X26-X	F21S-009/04; F21V-015/01; F21V-031/00	CN109140364-A 04 Jan 2019 F21S-009/04 201918 Pages: 6 Chinese	CN109140364-A CN10969601 23 Aug 2018	CN10969601 23 Aug 2018	DIIDW:2019053628
34	P	IN200902855-I4	System for generating power from tidal waves, has frame work provided with supports embedded onto ocean bed, and cylinder connected to tank located at land, which is linked to rotating element and finally coupled to dynamo by shaft unit.	DEVANAND P	DEVANAND P (DEVA-Individual)	201607997Q	NOVELTY - The system has a twin legged frame work (1) provided with set of supports embedded onto an ocean bed. The frame work contains a cylinder (2) snugly fitted onto the frame work. The cylinder includes a piston with a larger end at a bottom end with a surface contact with an ocean. The cylinder is acted upon by tidal waves. The piston of the cylinder includes a smaller end. The cylinder is …	Q54 (Non-positive displacement fluid engines (i.e. driven by fluid); Miscellaneous motors and machines for producing mechanical power/thrust (F03B,D,G,H)); X11 (Power Generation and High Power Machines); X15 (Non-Fossil Fuel Power Generating Systems)	Q54-X; X11-B; X15-C01; X15-C02	F03B-000/00	IN200902855-I4 22 Jan 2016 F03B-000/00 201619 Pages: 10 English	IN200902855-I4 INCH02855 20 Nov 2009	INCH02855 20 Nov 2009	DIIDW:201607997Q
35	P	CN204386798-U	Reciprocating pushing force crankshaft power generating device, has U-shaped guide rail fixed with sliding rack through guide wheel, where two sides and bottom part of guide wheel are mounted with track.	QIANG L	QIANG L (QIAN-Individual)	201547927G	NOVELTY - A reciprocating buoyancy pushing one crankshaft power generation device, injecting in liquid in the buoyancy pool, each equipped with horizontal track at two side in the buoyancy pool and the mounting rack in slide on horizontal track is groove-shaped, annular in two end of the centre shaft of the top end in horizontal magnetic suspension track inside, and the slide rack mesh is center …	Q54 (Non-positive displacement fluid engines (i.e. driven by fluid); Miscellaneous motors and machines for producing mechanical power/thrust (F03B,D,G,H)); X11 (Power Generation and High Power Machines)	X11-B	F03B-017/02	CN204386798-U 10 Jun 2015 F03B-017/02 201557 Pages: 16 Chinese	CN204386798-U CN20696501 20 Nov 2014	CN20696501 20 Nov 2014	DIIDW:201547927G
36	P	CN202441535-U	Draft depth adjusting multi-section linkage cover type 1000 KW tidal wave energy generating and collecting device for use during occurrence of Japanese earthquake, has energy-collecting cover connected with valve.	CHEN Y	CHEN Y (CHEN-Individual)	2012Q57387	NOVELTY - The device has a depth adjustable cover type tidal wave energy collector provided with a cuboid-shaped energy-collecting cover, a transmission gear, a turning wheel, a fly wheel, three swinging rods, a rack transmission rod, a valve and a valve cover unit. The transmission gear is fixed on a transmission shaft. The three swinging rods are respectively connected with a change gear, a fly…	Q54 (Non-positive displacement fluid engines (i.e. driven by fluid); Miscellaneous motors and machines for producing mechanical power/thrust (F03B,D,G,H)); X15 (Non-Fossil Fuel Power Generating Systems)	X15-C02	F03B-013/26	CN202441535-U 19 Sep 2012 F03B-013/26 201281 Pages: 7 Chinese	CN202441535-U CN20139103 05 May 2011	CN20139103 05 May 2011	DIIDW:2012Q57387
37	P	DE202009002859-U1	Device for direct conversion of e.g. wave energy, of ocean into electrical energy, has mechanical structure transferring varying force to piezo element that is attached at support structure.		WITTE G (WITT-Individual)	2009L34042	NOVELTY - The device has a mechanical structure transferring varying force to a piezo element (2) that is attached at a support structure (1). The force exerted on the mechanical structure is extracted from a wave movement of natural water. The mechanical structure is fastened to a base (3) by a single or multiple bore holes in a bend proof and removable manner, where the support structure is for…	Q54 (Non-positive displacement fluid engines (i.e. driven by fluid); Miscellaneous motors and machines for producing mechanical power/thrust (F03B,D,G,H)); V06 (Electromechanical Transducers and Small Machines); X15 (Non-Fossil Fuel Power Generating Systems)	V06-M06D; X15-C01; X15-C02	F03B-013/16; F03B-013/18; H01L-041/113; H02N-002/18	DE202009002859-U1 09 Jul 2009 F03B-013/18 200946 Pages: 3 German	DE202009002859-U1 DE20002859 28 Feb 2009	DE20002859 28 Feb 2009	DIIDW:2009L34042
38	P	KR2001044819-A; KR392078-B1	Wave power generation system includes floating tanks, channels, main rope, rope fixing floats, connection ropes, four inclined tracting anchors, inclined tracting anchor ropes and roller chains.	CHUN S O	CHUN S O (CHUN-Individual)	2002250899	NOVELTY - A wave power generation system is provided to generate electricity by potential energy of a floating tank having electric generation and transmission equipments and to generate ocean energy capable of being maintained in a low price in comparison with generation equipments using tidal energy.	Q55 (Positive displacement fluid machines/pumps/compressors (i.e. for driving fluid) (F04B,C)); X15 (Non-Fossil Fuel Power Generating Systems)	X15-C01	F03B-013/14	KR2001044819-A 05 Jun 2001 F03B-013/14 200230 Pages: 1	KR2001044819-A KR016333 28 Mar 2001	KR016333 28 Mar 2001	DIIDW:2002250899
39	P	CN104731238-A	Computer display has pedestal connected with inside temperature control device that is connected with micro-processor and power supply switch, where power supply switch and pedestal are fixed in power source.	ZHANG T	XI'AN SINENG NETWORK TECHNOLOGY CO LTD (XIAN-Non-standard)	2015502056	NOVELTY - The display has a pedestal (2) whose front end surface is connected with a rectangular heating plate (3). A center portion of the heating plate is connected with a heating device (5). The heating plate is provided with an inside temperature sensor (6). The pedestal is connected with an inside temperature control device (9) that is connected with a micro-processor (8) and a power supply …	Q76 (Drying (F26)); T01 (Digital Computers); U14 (Memories, Film and Hybrid Circuits); X25 (Industrial Electric Equipment)	Q76-T04; Q76-T06; T01-F04; T01-L01; T01-L02A; U14-K01; X25-B04	F26B-023/00; G06F-001/16	CN104731238-A 24 Jun 2015 G06F-001/16 201561 Pages: 5 Chinese	CN104731238-A CN10708732 20 Dec 2013	CN10708732 20 Dec 2013	DIIDW:2015502056
40	P	EP3838431-A1; WO2021122259-A1; TW202133955-A	System for preventing anti-fouling of surfaces for marine objects such as ships, comprises an array of LEDs formed as multiple rows of LEDs and each row of LEDs has a substrate unit and LEDs mounted along with the substrate unit.	PAULUSSEN E J M	KONINK PHILIPS NV (PHIG-C)	2021697285	NOVELTY - The anti-fouling lighting system comprises an array of LEDs (80) formed as multiple rows of LEDs. Each row of light-emitting diode (LEDs) has a substrate unit (100) and LEDs mounted along with the substrate unit. The LEDs have side-emitting LEDs. Each row of LEDs has a staggering assembly of the LEDs with alternate LEDs positioned on opposite sides of a centerline of the row of LEDs. Ea…	P43 (Sorting, cleaning, waste disposal (B06, B07, B08, B09).); X15 (Non-Fossil Fuel Power Generating Systems)	P43-B08; P43-U03; P43-U05; X15-B01A; X15-B03; X15-B06; X15-C02	B08B-017/02	EP3838431-A1 23 Jun 2021 B08B-017/02 202153 Pages: 24 English	EP3838431-A1 EP219080 20 Dec 2019	EP219080 20 Dec 2019	DIIDW:2021697285
41	P	CN111663512-A	Gear based energy-saving and environmentally friendly ship lifting device, has rack whose outer side is movably connected with first fixing plate, and rack whose bottom end is movably connected with second fixing plate.	BAO J	BAO J (BAOJ-Individual)	2020923105	NOVELTY - The device has a first connecting rod movably connected with a pawl. An outer side of the pawl is movably connected with a ratchet wheel. An outer side of the ratchet wheel is connected with a first gear. An outer side of the first gear is meshed with a second gear. A platform (1) is connected with a runner (9). An end of a belt is movably connected with a first connecting piece (11). T…	Q42 (Hydraulic engineering, soil shifting and sewerage (E02, 3))	Q42-A04	E02C-005/00	CN111663512-A 15 Sep 2020 E02C-005/00 202081 Pages: 9 Chinese	CN111663512-A CN10583628 24 Jun 2020	CN10583628 24 Jun 2020	DIIDW:2020923105
42	P	CN109058034-A; CN109058034-B	Energy-coastal tidal power generation device, has fixing frame fixed on coast, where fixing frame is movably connected with buoy that is provided with hydroelectric mechanism and side of fixed baffle plate is provided with water inlet.	MAO C	SHENZHEN FURUIXI TECHNOLOGY DEV CO LTD (SHEN-Non-standard)	201900796C	NOVELTY - The frame has a fixing frame fixed on a coast. The fixing frame is movably connected with a buoy that is provided with a bidirectional hydroelectric mechanism for energy absorption. The buoy is provided with a connecting rod. An outer end of the connecting rod is provided with a sliding block. The fixing frame is provided with a vertical slide rail that is connected with the sliding blo…	Q54 (Non-positive displacement fluid engines (i.e. driven by fluid); Miscellaneous motors and machines for producing mechanical power/thrust (F03B,D,G,H)); X11 (Power Generation and High Power Machines); X15 (Non-Fossil Fuel Power Generating Systems)	Q54-X; X11-B; X15-C02	F03B-013/26	CN109058034-A 21 Dec 2018 F03B-013/26 201912 Pages: 9 Chinese	CN109058034-A CN10871620 02 Aug 2018	CN10871620 02 Aug 2018	DIIDW:201900796C
43	P	CN203783806-U	Capturing wave energy ocean tidal power generation system, has trapezoid dam body provided with outer and inner dam bodies, inner dam body is fixed with water flow channel, and side dam body whose outer wall is fixed with exit gate.	GAO Y	PAN Z (PANZ-Individual)	2014U48108	NOVELTY - This utility new type claims a new-type one capturing wave energy of ocean tidal power generation system, comprise reservoir and power generation device, a reservoir is trapezoid dam body on the ocean in a set, the inner outer trapezoid dam body comprise a dam body and dam body inner, inner dam body set with a first water flow channel connected first reservoir and second reservoir, said…	Q54 (Non-positive displacement fluid engines (i.e. driven by fluid); Miscellaneous motors and machines for producing mechanical power/thrust (F03B,D,G,H)); X11 (Power Generation and High Power Machines); X15 (Non-Fossil Fuel Power Generating Systems)	X11-B; X15-C01; X15-C02	F03B-013/26	CN203783806-U 20 Aug 2014 F03B-013/26 201475 Pages: 7 Chinese	CN203783806-U CN20217619 30 Apr 2014	CN20217619 30 Apr 2014	DIIDW:2014U48108
44	P	WO2019229290-A1; CN112400059-A; EP3803100-A1; US2021222666-A1; EP3803100-A4; US11493016-B2; US2022389898-A1; US2022389899-A1; EP4112917-A1; EP4112918-A1; CN115638076-A; CN112400059-B; CN115788750-A; US11698051-B2; US11719218-B2; EP3803100-B1; EP3803100-C0	Wave energy recovery apparatus with power-take-off arrangement, has panel that is arranged to rotate half of generator when panel is rotating into one direction and another half of generator when panel is rotating into opposite direction.	RIDGEWELL C	AW-ENERGY OY (AWEN-Non-standard)	2019A2314B	NOVELTY - The apparatus has a base (1), a reciprocating panel (2), a power-take-off (PTO) unit (6) with a generator to convert kinetic energy of waves or tidal currents to electricity. A gear transmission and an one-way clutch mechanism are operatively connected between the panel and the generators. The panel is arranged to rotate a half of the generators when the panel is rotating into one direc…	Q54 (Non-positive displacement fluid engines (i.e. driven by fluid); Miscellaneous motors and machines for producing mechanical power/thrust (F03B,D,G,H)); X15 (Non-Fossil Fuel Power Generating Systems)	Q54-X; X15-C01	F03B-013/18; F03B-013/26; F03B-013/14	WO2019229290-A1 05 Dec 2019 F03B-013/18 201996 Pages: 34 English	WO2019229290-A1 WOFI050407 30 May 2018	CN11417040 30 May 2018	DIIDW:2019A2314B
45	P	CN112228271-A; CN213684380-U	Wave integrated array suspension type power generation device, has connecting rod mechanism for driving generator to generate electricity, and buoy installed on sides of bracket, where wave-type water turbine floats on sea surface by buoy.	CAO Y	UNIV SHANGHAI OCEAN (USHO-C)	202110503L	NOVELTY - The device has a wave-flow water turbine installed on a bracket and provided with an impeller, a transmission connecting rod mechanism, a generator and a buoy. The impeller is rotated along circumference direction. The transmission connecting rod mechanism drives the generator to generate electricity. The buoy is installed on two sides of the bracket. The wave-type water turbine floats …	Q54 (Non-positive displacement fluid engines (i.e. driven by fluid); Miscellaneous motors and machines for producing mechanical power/thrust (F03B,D,G,H)); X11 (Power Generation and High Power Machines); X15 (Non-Fossil Fuel Power Generating Systems)	Q54-A05; Q54-X; X11-B01; X11-J05; X15-C01	F03B-011/00; F03B-013/20; F03B-003/00	CN112228271-A 15 Jan 2021 F03B-013/20 202113 Pages: 12 Chinese	CN112228271-A CN11208951 03 Nov 2020	CN11208951 03 Nov 2020	DIIDW:202110503L
46	P	WO2017207878-A1; FI201605457-A; FI128092-B1	Production of lithium metal phosphate used as cathode material, involves reacting lithium bicarbonate in solution with metal ions and phosphate ions, separating solids from solution, and recovering non-conductive lithium metal phosphate.	SIREN O	KELIBER OY (KELI-Non-standard)	201783456G	NOVELTY - Production of lithium metal phosphate (19) involves providing a solution (11) containing purified lithium bicarbonate, reacting the lithium bicarbonate in the solution with metal ions and phosphate ions to produce a solid precipitate, separating the solids from the solution by solid-liquid separation, and recovering non-conductive lithium metal phosphate.	E34 (Compounds of Li, Na, K, Rb, Cs, Fr.); ; X11 (Power Generation and High Power Machines); X16 (Electrochemical Storage); X21 (Electric Vehicles)	E31-K03; L03-E01B3; L03-E01B5B; L03-E06; L03-E08B; L03-H05; L03-J01; X11-B; X11-U01E; X11-U02; X16-B01F1; X16-E01C; X16-E01G; X21-A01F; X21-B01A	C01B-025/37; H01M-004/1397; H01M-004/36; H01M-004/58; C01G-049/00; H01M-004/136	WO2017207878-A1 07 Dec 2017 C01B-025/37 201801 Pages: 32 English	WO2017207878-A1 WOFI050412 01 Jun 2017	FI005457 01 Jun 2016	DIIDW:201783456G
47	P	CN105626349-A	Wing type vertical shaft water turbine for producing electricity by seawater tidal power, has flaps hinged by flap pivots on edges of blades which are arranged on outer periphery of main rotating shaft fixed at center of propeller hub.	WANG H	UNIV ZHEJIANG OCEAN (UYZO-C)	2016369756	NOVELTY - The wing type vertical shaft water turbine comprises a propeller hub, a main rotating shaft (4) fixed at the center of the propeller hub, blades (1) arranged on outer periphery of the propeller hub at equal angles, and flaps (2) hinged on edges of the blades by flap pivots (3). Reinforcing ribs (11) are arranged horizontally on each blade perpendicular to main rotating shaft.	Q54 (Non-positive displacement fluid engines (i.e. driven by fluid); Miscellaneous motors and machines for producing mechanical power/thrust (F03B,D,G,H))	Q54-A05	F03B-003/12	CN105626349-A 01 Jun 2016 F03B-003/12 201649 Pages: 5 Chinese	CN105626349-A CN10969249 21 Dec 2015	CN10969249 21 Dec 2015	DIIDW:2016369756
48	P	CN213574447-U	Tidal energy generating device for propeller at two sides, has shaft system whose end is provided with hub, where periphery of hub is arranged with blades and rotor and stator are orderly sleeved on outer wall of shaft system.	JI Q	NANJING HIGH ACCURATE MARINE EQUIP CO LT (NANJ-Non-standard)	202178177S	NOVELTY - The utility model is suitable for power flow energy generating device technology field, providing a power flow energy generating device of propeller at two sides, the device comprises a control box and a power generating device shell connected with the control box and the ship body through the supporting upright post; the power generating device shell is provided with a variable pitch p…	Q54 (Non-positive displacement fluid engines (i.e. driven by fluid); Miscellaneous motors and machines for producing mechanical power/thrust (F03B,D,G,H)); S02 (Engineering Instrumentation); X11 (Power Generation and High Power Machines); X15 (Non-Fossil Fuel Power Generating Systems)	Q54-A05; Q54-X; S02-A10B; X11-B01; X11-J05; X15-C02; X15-C03	F03B-013/26; F03B-003/14; G01B-021/16	CN213574447-U 29 Jun 2021 F03B-013/26 202156 Pages: 6 Chinese	CN213574447-U CN21875162 01 Sep 2020	CN21875162 01 Sep 2020	DIIDW:202178177S
49	P	CN211914674-U	Surface marine organism automatic cleaning device for maritime work facility base structure, has sliding block provided with first sliding block and second sliding block, where first sliding block is less than sea water specific gravity.	CHEN Q	SHENZHEN ANDUN OCEAN NEW MATERIALS CO (SHEN-Non-standard)	2020B5611H	NOVELTY - The utility model claims a surface marine organism automatic cleaning device for maritime work facility base structure, comprising a track and a sliding block, the track is set on the outer surface of the maritime work facility base structure; the sliding block is set on the track, which can move along the track direction. using power provided by tidal energy; the sliding block slides a…	P43 (Sorting, cleaning, waste disposal (B06, B07, B08, B09).); Q42 (Hydraulic engineering, soil shifting and sewerage (E02, 3))	P43-B01A; Q42-A10	B08B-001/00; B08B-013/00; E02D-027/12; E02D-027/52	CN211914674-U 13 Nov 2020 B08B-001/00 202095 Pages: 6 Chinese	CN211914674-U CN22253703 16 Dec 2019	CN22253703 16 Dec 2019	DIIDW:2020B5611H
50	P	DE102022214031-A1; CN118224305-A; EP4390186-A1; US2024200523-A1	Sealing system for sealing rotatable component e.g. shaft of underwater turbine, has free space that is provided between seal carrier and component to form chamber in which lubricant is recorded.	MEMMEL M	SKF AB (SKFK-C)	202466119X	NOVELTY - The system (100) has seal carriers (20) which are arranged adjacent to one another, where each seal carrier carries a sealing element (30) with an annular sealing structure (32) and a sealing lip (34) extending from the sealing structure. The sealing structure is fastened to the seal carrier and the sealing lip extends in the direction of the rotatable component and has a running surfac…	Q62 (Shafts and bearings (F16C))	Q62-G02; Q62-G08; Q62-G09	F16C-019/00; F16C-033/66; F16C-033/76; F16J-015/3204; F16J-015/3284; F03B-011/00; F16C-033/78; F16J-015/00; F16J-015/322; F16J-015/324	DE102022214031-A1 20 Jun 2024 F16C-033/76 202454 German	DE102022214031-A1 DE10214031 20 Dec 2022	DE10214031 20 Dec 2022	DIIDW:202466119X
51	P	CN118004351-A	Wave-removing and flow-reducing device suitable for harbor marine photovoltaic, has vibrator that is fixedly connected to rack at one end corresponding to power generation system, and power generation system is provided with mounting element.	WANG X	UNIV TIANJIN (UTIJ-C)	202451431D	NOVELTY - The device has a spring limiting layer (32) that is located on the top or bottom surface of a current reduction power generation device (3). A vibrator (31) is arranged between the spring limiting layer and a second power generation system (33). The spring limiting layer and the second power generation system are provided with moving tracks corresponding to each vibrator. The movement t…	Q42 (Hydraulic engineering, soil shifting and sewerage (E02, 3)); W06 (Aviation, Marine and Radar Systems); X15 (Non-Fossil Fuel Power Generating Systems); X11 (Power Generation and High Power Machines)	Q42-A; W06-C01C; W06-C07A; W06-C15G; X15-A02; X15-A10; X15-C01; X15-C02; X11-B; X11-U05	B63B-035/44; B63B-039/00; E02B-003/06; F03B-013/18; F03B-013/26; H02K-035/02; H02S-010/10	CN118004351-A 10 May 2024 B63B-039/00 202442 Chinese	CN118004351-A CN10259978 07 Mar 2024	CN10259978 07 Mar 2024	DIIDW:202451431D
52	P	EP3754823-A1	High-efficiency compact electric generator used for wind turbine farms, has secondary inductive current picking system that picks inductive currents induced by axial portion of magnetic field to exhibit near zero counter-electromotive force.	MARTINEZ GONZALEZ R	BIOCORE S COOP (BIOC-Non-standard)	2020C9615D	NOVELTY - The electric generator (10) has stator that has main inductive current picking system (32) that generates electricity mainly from the radial portion of the magnetic field and a secondary inductive current picking system (34) arranged and configured to pick inductive currents induced at least partly by an axial portion of the magnetic field. The secondary inductive current picking system…	X11 (Power Generation and High Power Machines); X15 (Non-Fossil Fuel Power Generating Systems)	X11-H09; X11-J01A; X11-J01B; X11-J05B; X11-U01E; X15-B01A; X15-B01B	H02K-001/18; H02K-001/22; H02K-001/26; H02K-001/27; H02K-016/04; H02K-007/18	EP3754823-A1 23 Dec 2020 H02K-016/04 202103 Pages: 17 English	EP3754823-A1 EP382511 19 Jun 2019	EP382511 19 Jun 2019	DIIDW:2020C9615D
53	P	CN203756424-U	Tide energy generating set, has support structure fixed to seabed, electrical machine fixed on horizontal upper support, lifting cable connected to motor through support pole, and vertical beam whose end part is formed with groove.	LI M	GUODIAN UNITED POWER TECHNOLOGY CO LTD (CGUO-C)	2014T04243	NOVELTY - This new type utility claims one a tide generating set comprise support structure fixed to the seabed and a hydroelectric generating set and support structure of a, a support structure include one multi-rows of a vertical beam and fixed on the horizontal of a multi-vertical beam top part support, said two adjacent a vertical beam and is located on the outer side of the vertical beam of …	Q54 (Non-positive displacement fluid engines (i.e. driven by fluid); Miscellaneous motors and machines for producing mechanical power/thrust (F03B,D,G,H)); X15 (Non-Fossil Fuel Power Generating Systems)	X15-C01; X15-C02	F03B-013/14	CN203756424-U 06 Aug 2014 F03B-013/14 201469 Pages: 7 Chinese	CN203756424-U CN20085391 27 Feb 2014	CN20085391 27 Feb 2014	DIIDW:2014T04243
54	P	CN103234677-A; CN103234677-B	Oscillating-type tidal generating capturing efficiency testing device, has water pump whose two ends are connected with water tank through pipeline, where water tank is provided with water flow power unit.	LU J	UNIV SHANDONG (USHA-C)	2013U28858	NOVELTY - The device has a water pump whose two ends are connected with a water tank (1.1) through a pipeline (1.2). A bracket is connected with a sliding plate (4) through a slide rail (3). The sliding plate is driven by a stepping motor (5). A wing plate is fixed in the water tank. The sliding plate is fixed with a rack (9). The bracket is provided with a motor (7) that is provided with the rac…	S01 (Electrical Instruments); S02 (Engineering Instrumentation)	S01-G07; S02-F02; S02-J	G01L-003/26; G01R-031/34	CN103234677-A 07 Aug 2013 G01L-003/26 201374 Pages: 6 Chinese	CN103234677-A CN10130525 15 Apr 2013	CN10130525 15 Apr 2013	DIIDW:2013U28858
55	P	WO2007030899-A1; GB2441916-A; DE112006002449-T5; GB2441916-B; DE112006002449-B4	Floating platform for doing work, has main support including bearings of different height for two crossed levers that has balloon hinged via bearings to fork, where reflector of water energy is fixed to platform.	BOTEV P G	BOTEV P G (BOTE-Individual)	2007327686	NOVELTY - The device has a main support (2) that includes bearings of different height for two perpendicularly crossed levers (3). Each lever has a balloon (4) that is hinged via bearings to a fork. A reflector (34) of water energy is fixed to a platform under the balloon. A diametrical point is positioned in a plane of the balloon in the direction of the lever. A ratchet mechanism has a wheel fi…	Q54 (Non-positive displacement fluid engines (i.e. driven by fluid); Miscellaneous motors and machines for producing mechanical power/thrust (F03B,D,G,H))		F03B-013/12; F03B-013/16; F03B-013/20; F03B-013/18	WO2007030899-A1 22 Mar 2007 F03B-013/12 200731 Pages: 14 English	WO2007030899-A1 WOBG000015 17 Aug 2006	BG109296 16 Sep 2005	DIIDW:2007327686
56	P	CN116378881-A	Tail water power generator device, has water wheel transmission shaft whose front end is equipped with blade, and generator connecting piece installed on frame transverse bracket, where top portion of generator connecting piece is provided with generator.	JIANG R	GUIZHOU ZHONGLIAN HYDROGEN ENERGY DESIGN (GUIZ-Non-standard)	202372991U	NOVELTY - The device has a water wheel transmission shaft (9) whose front end is equipped with a blade (5). A top end of a first large gear transmission shaft (13) is connected with a second large gear transmission shaft (16) through a first large gear transmission shaft coupling (15). A top end of the second large gear transmission shaft is connected with a generator connecting piece (18) throug…	Q54 (Non-positive displacement fluid engines (i.e. driven by fluid); Miscellaneous motors and machines for producing mechanical power/thrust (F03B,D,G,H)); X15 (Non-Fossil Fuel Power Generating Systems)	Q54-A05; Q54-X; X15-C02	F03B-011/00; F03B-013/00; F03B-013/26; F03B-003/18	CN116378881-A 04 Jul 2023 F03B-013/00 202361 Chinese	CN116378881-A CN10550911 16 May 2023	CN10550911 16 May 2023	DIIDW:202372991U
57	P	CN219262565-U	Fixed mechanism for tidal power generation, has rotating shafts whose outer side is rotatably connected with clamping plate, where inner sides of clamping plates are fixedly mounted with anti-sliding plate.	SHI F	QINGDAO GULANG OCEAN TECHNOLOGY CO LTD (QING-Non-standard)	202374915D	NOVELTY - The utility model relates to the technical field of tidal power generation, and claims a fixed mechanism for tidal power generation, solving the problem that it is inconvenient to quickly install the tidal energy generator, comprising a pre-embedded plate, the top part-embedded plate is equipped with a clamping mechanism, the top part mechanism is equipped with a locking mechanism, the …	Q54 (Non-positive displacement fluid engines (i.e. driven by fluid); Miscellaneous motors and machines for producing mechanical power/thrust (F03B,D,G,H)); X15 (Non-Fossil Fuel Power Generating Systems); X11 (Power Generation and High Power Machines)	Q54-X; X15-C02; X11-B01; X11-J05	F03B-011/00; F03B-011/02; F03B-013/26	CN219262565-U 27 Jun 2023 F03B-013/26 202358 Chinese	CN219262565-U CN20190472 06 Feb 2023	CN20190472 06 Feb 2023	DIIDW:202374915D
58	P	WO2017155402-A1; NL2016401-B1; AU2017231583-A1; CN108699795-A; KR2018120215-A; SG11201805983-A1; EP3426846-A1; US2019048551-A1; JP2019507834-W; US10494786-B2; CN108699795-B; EP3426846-B1; JP6921097-B2; AU2017231583-B2; SG11201805983-B; KR2399904-B1	Frame for guiding and supporting foundation element e.g. pile, has one of guide mechanisms comprising slider, path supporting slider, rotatable link, and actuator to move slider along path and link between extended and retracted positions.	BOOT A H	IHC HOLLAND IE BV (INHL-C)	201764355A	NOVELTY - The frame (5) has guide mechanisms (10) that are movable between an extended position to engage a pile (2) located inside the frame and a retracted position. One of the guide mechanisms comprises a slider, a path supporting the slider, a rotatable link, and an actuator to move the slider along the path and the link between the extended and retracted positions, where the link is exchange…	Q42 (Hydraulic engineering, soil shifting and sewerage (E02, 3))	Q42-A10	E02D-013/00; E02D-013/04; E02D-027/52	WO2017155402-A1 14 Sep 2017 E02D-013/00 201765 Pages: 19 English	WO2017155402-A1 WONL050148 09 Mar 2017	NL2016401 09 Mar 2016	DIIDW:201764355A
59	P	WO2011059411-A2; WO2011059411-A3	Compound V-shaped blade tidal turbine for generating electricity, has blades assembled to form blade panel, and water stream velocity accelerating walls including self-openable doors i.e. bleeding doors, mounted to walls.	SUTTISILTUM A	SUTTISILTUM A (SUTT-Individual)	2011F29739	NOVELTY - The tidal turbine has blades assembled to form a blade panel. Water stream velocity accelerating walls (13) are installed in two units of both upstream and downstream of the water stream flow entrance to the blades. The water stream velocity accelerating walls includes self-openable doors i.e. bleeding doors (14), mounted to the walls. A step up gearbox is installed on a support beam or…	Q54 (Non-positive displacement fluid engines (i.e. driven by fluid); Miscellaneous motors and machines for producing mechanical power/thrust (F03B,D,G,H)); X15 (Non-Fossil Fuel Power Generating Systems)	X15-C02B	F03B-013/26; F03B-017/06; F03B-003/12	WO2011059411-A2 19 May 2011 F03B-013/26 201135 Pages: 12 English	WO2011059411-A2 WOTH000041 10 Nov 2010	TH1005050 11 Nov 2009	DIIDW:2011F29739
60	P	CN114872847-A; CN114872847-B	Floating marine comprehensive power station for generating electricity, has transmission piece arranged between water wheel shaft and power generation component, where power of water wheel shaft is transmitted to power generation component.	XU J	XU X (XUXX-Individual)	2022A49328	NOVELTY - The station has multiple small floating bodies (2) floating on a sea level and connected with a main floating body (1). A power component is fixedly arranged on the small floating body. A power output end of the power component is connected with a power generating component that is fixed on the main floating body. The power component is provided with a water wheel shaft (3) that is rota…	Q54 (Non-positive displacement fluid engines (i.e. driven by fluid); Miscellaneous motors and machines for producing mechanical power/thrust (F03B,D,G,H)); W06 (Aviation, Marine and Radar Systems); X11 (Power Generation and High Power Machines); X15 (Non-Fossil Fuel Power Generating Systems)	Q54-A05; W06-C15G; W06-C01C; X11-U05; X11-J05; X11-B01; X15-C02; X15-C01	B63B-035/44; F03B-013/22; F03B-013/26; F03B-003/12	CN114872847-A 09 Aug 2022 B63B-035/44 202271 Chinese	CN114872847-A CN10466543 29 Apr 2022	CN10466543 29 Apr 2022	DIIDW:2022A49328
61	P	RU2618315-C1	Method for producing water from air.	EROFEEV E A	UNIV TYUMEN IND (UTYU-C)	201766215M	NOVELTY - Invention relates to the field of autonomous production of fresh drinking water from the moisture of surrounding maritime atmospheric air and can also be used for domestic and economic needs. The method includes the use of generators (11) of pneumatic energy. The compressed air flow after the generators (11) is cooled in the condensers (6) with precipitation and moisture intake. Atmosph…	Q42 (Hydraulic engineering, soil shifting and sewerage (E02, 3))	Q42-D	E03B-003/28	RU2618315-C1 03 May 2017 E03B-003/28 201767 Pages: 0 Russian	RU2618315-C1 RU111554 28 Mar 2016	RU111554 28 Mar 2016	DIIDW:201766215M
62	P	GB2491403-A; GB2491403-B	Pump assembly for raising portion of water stream used in system for extracting power from water flow, has impellers driven by end-to-end water flow to force out portion of water flow through port.	PODD T J	PODD T J (PODD-Individual)	2012Q82955	NOVELTY - The pump assembly (10) has an elongate housing (12) with two end sections (24,26) and a central section (28) of smaller cross-sectional area in-between. Impellers (18,19,20) with respective blades (36,37,50) are individually disposed in the end sections and the central section. The blades of the impeller in the central section are counter-pitched relative to that in each end section. A …	Q54 (Non-positive displacement fluid engines (i.e. driven by fluid); Miscellaneous motors and machines for producing mechanical power/thrust (F03B,D,G,H)); Q56 (Non-positive displacement fluid machines/pumps/compressors (i.e. for driving fluid) (F04D,F)); X11 (Power Generation and High Power Machines); X15 (Non-Fossil Fuel Power Generating Systems)	X11-B05; X15-C02	F03B-013/26; F04D-013/04	GB2491403-A 05 Dec 2012 F04D-013/04 201281 Pages: 35 English	GB2491403-A GB009325 03 Jun 2011	GB009325 03 Jun 2011	DIIDW:2012Q82955
63	P	KR2023163314-A	Multi-stage spiral sail variable-wing turbine for tidal current power generation, has multi-spiral variable-wing turbine which is for tidal power generation, and generator is driven at upper end of mooring line frame by power transmission device formed on drive shaft.	WHANG Y A	WHANG Y A (WHAN-Individual)	2023C4833N	NOVELTY - The variable-wing turbine has wing hubs that are formed at the front and rear of the horizontal drive shaft installed at the bottom of the mooring line frame (115), and each of the above-described wing hubs has a radial blade shaft, and the sail variable blades woven with flexible fabric are spirally mounted on the wing axes at opposite angles in each of the wing hubs. The multi-spiral …	Q54 (Non-positive displacement fluid engines (i.e. driven by fluid); Miscellaneous motors and machines for producing mechanical power/thrust (F03B,D,G,H)); X11 (Power Generation and High Power Machines); X15 (Non-Fossil Fuel Power Generating Systems)	Q54-X; X11-B01; X11-J05; X15-C02	F03B-011/00; F03B-013/26	KR2023163314-A 30 Nov 2023 F03B-013/26 202399 Pages: 12	KR2023163314-A KR156219 10 Nov 2023	KR156219 10 Nov 2023	DIIDW:2023C4833N
64	P	CN216950660-U	Submarine power generation device based on marine tidal energy, has skirt hem whose end portion is connected to two sides of baffle, and main shaft of impeller group is transmitted to rotor shaft of brushless generator through gear transmission.	XU J	XU J (XUJJ-Individual)	2022968331	NOVELTY - The utility model claims a submarine power generation device based on ocean current energy, comprising a blade wheel group, a gear transmission and a brushless generator; the impeller group is composed of several impellers installed on the main shaft; each impeller is provided with more than two blades uniformly distributed, each blade is arc-shaped design, the arc-shaped convex surface…	Q54 (Non-positive displacement fluid engines (i.e. driven by fluid); Miscellaneous motors and machines for producing mechanical power/thrust (F03B,D,G,H)); X11 (Power Generation and High Power Machines)	Q54-X; Q54-A05; X11-U05; X11-J05; X11-H01; X11-B01	F03B-011/00; F03B-013/10; F03B-003/12	CN216950660-U 12 Jul 2022 F03B-013/10 202263 Chinese	CN216950660-U CN20475052 05 Mar 2022	CN20475052 05 Mar 2022	DIIDW:2022968331
65	P	WO2014161607-A1; CN105074204-A; EP2981713-A1; US2016053746-A1; US9938959-B2; CN105074204-B; EP2981713-B1	Bearing system for supporting blades of turbine, includes two bearing units spaced apart along pitch axis to rotationally mount dynamic frame at each blade to static frame.	VERHULST L	SKF AB (SKFK-C)	2014S15280	NOVELTY - The bearing system (100) has two bearing units (140,160) for rotationally mounting a dynamic frame (120) to a static frame. The other bearing unit is distanced from one bearing unit along a pitch axis (A). The static frame has two shaft sections (145), each mounted with the ring of the respective bearing unit. A hub has a central portion (105) interconnecting one of the shaft sections.	Q54 (Non-positive displacement fluid engines (i.e. driven by fluid); Miscellaneous motors and machines for producing mechanical power/thrust (F03B,D,G,H)); X15 (Non-Fossil Fuel Power Generating Systems)	X15-B01A; X15-C02B	F03D-001/06; F03D-011/00; F03D-013/00; F03D-003/06; F03D-080/70	WO2014161607-A1 09 Oct 2014 F03D-011/00 201467 Pages: 33 English	WO2014161607-A1 WOEP059494 07 May 2013	WOEP057048 03 Apr 2013	DIIDW:2014S15280
66	P	CN203477319-U	Floating type tide power station one transmission shaft, has lower bearing base connected with bearing, upper main shaft set connected with connecting tube, and seal connected with upper bearing base and lower bearing base.	LI F	DAISHAN GAOTING SHIPYARD (DAIS-Non-standard)	2014H52434	NOVELTY - This utility new type claims a floating type tide power station one transmission shaft, aiming at solving the problems of tide energy power transmission shaft contact to sea water corrosion is easy to rust, the service life is short of. This utility new type comprises a main shaft, a main shaft of upper and lower end respectively connect upper bearing base and the lower bearing base, th…	Q54 (Non-positive displacement fluid engines (i.e. driven by fluid); Miscellaneous motors and machines for producing mechanical power/thrust (F03B,D,G,H)); Q65 (Pistons, cylinders, packing (F16J)); X15 (Non-Fossil Fuel Power Generating Systems)	X15-C02	F03B-013/26; F16J-015/16; F16J-015/18	CN203477319-U 12 Mar 2014 F16J-015/16 201429 Pages: 6 Chinese	CN203477319-U CN20561013 10 Sep 2013	CN20561013 10 Sep 2013	DIIDW:2014H52434
67	P	CN118110126-A	Regenerated concrete marine wave-absorbing block, has upper cover plate covered on upper end of block, where inner part of block is provided with holes, and middle part is formed with groove, and groove provided with impeller generator.	LONG X	WENZHOU QIUSHI TECHNOLOGY CO LTD (WENZ-Non-standard)	202462959E	NOVELTY - The block has an upper cover plate, a lower base and a wave-absorbing block that are arranged on an upper end of an upper side of a lower cover plate. The lower base is arranged at a bottom end of the wave absorption block. The wave absorption blocks are internally provided with multiple wave absorption holes that penetrate from front to back and from left to right. A groove is provided…	Q42 (Hydraulic engineering, soil shifting and sewerage (E02, 3))	Q42-A	E02B-003/06	CN118110126-A 31 May 2024 E02B-003/06 202450 Chinese	CN118110126-A CN10297371 15 Mar 2024	CN10297371 15 Mar 2024	DIIDW:202462959E
68	P	CN115204073-A	Tide prediction method based on Krikin interpolation, involves performing Kriging interpolation on harmonic constant of tide moisture of tide-testing station obtained by calculation, and solving point-to-be-calculated harmonic constant.	QIN P	UNIV DALIAN TECHNOLOGY (UYDA-C)	2022D2595C	NOVELTY - The method involves performing Kriging interpolation to determine the law that the research object changes with the spatial position according to the sample points. The similarity of attributes is expressed by the semivariance function, and the similarity of space is expressed by distance. The geometric distance between zi(xi,yi) and zj(xj,yj) Kriging interpolation assumes that there is…	S02 (Engineering Instrumentation); T01 (Digital Computers); W07 (Electrical Military Equipment and Weapons)	S02-B04; T01-J15X; T01-J15B; W07-X05	G01C-013/00; G06F-113/08; G06F-119/14; G06F-030/28	CN115204073-A 18 Oct 2022 G06F-030/28 202290 Chinese	CN115204073-A CN10924597 02 Aug 2022	CN10924597 02 Aug 2022	DIIDW:2022D2595C
69	P	CN211908683-U	Double-cone piezoelectric friction nano-hybrid generator, has composite generating module provided with double-arc supporting layer, and upper box body whose bottom part is connected with upper floating module that is provided with boat body.	LI C	UNIV WENZHOU (UNWZ-C)	2020B4769C	NOVELTY - The utility model claims a double-conical piezoelectric friction nano hybrid generator, comprising a rotary energy conversion module, the rotary energy conversion module comprises an upper box body with a top cover; the centre of the upper box body is provided with a hollow ball column; the hollow ball column is connected with a ball fork type universal joint; the top end of the ball-fo…	V06 (Electromechanical Transducers and Small Machines)	V06-M06D2; V06-M06F; V06-M06G8A; V06-M16	H02N-001/04; H02N-002/18	CN211908683-U 10 Nov 2020 H02N-002/18 202097 Pages: 8 Chinese	CN211908683-U CN21033201 08 Jun 2020	CN21033201 08 Jun 2020	DIIDW:2020B4769C
70	P	CN211753355-U	High-efficiency energy-saving desulfurizing and dust-removing device, has dust filtering room whose end is connected with connecting pipe, and desulfurizing tower whose upper part is provided with draught fan that is provided with rainproof cover plate.	FANG S	TAIYUAN ZHONGNING HYDROCARBON CONVERSION (TAIY-Non-standard)	2020A8502H	NOVELTY - The utility model claims a high-efficiency energy-saving desulfurizing and dust-removing device, comprising an air inlet pipe and a desulfurizing tower; the air inlet pipe is connected with the coal economizer; and the other end of the coal economizer is connected with the inlet pipe; and the inlet pipe is connected with the dust filtering room; the other end of the dust filtering room …	J01 (Separation - including evaporation, crystallisation, solvent extraction, chromatography, dialysis, osmosis including drying gases and/or vapours, and separation of solids from gases, liquids and other solids. Isotope separation, filter materials (including molecular sieves for separation), and centrifuges (except where used for analysis) (B01D, B03, B04, B07B).)	J01-E02; J01-G03B	B01D-046/12; B01D-053/48; B01D-053/78; B01D-046/00	CN211753355-U 27 Oct 2020 B01D-046/12 202091 Pages: 8 Chinese	CN211753355-U CN22469507 31 Dec 2019	CN22469507 31 Dec 2019	DIIDW:2020A8502H
71	P	CN111501884-A; CN111501884-B	Power flow energy based harbor pool dredging device, has connecting plate whose two sides are respectively located on dual-body ship, and connecting shaft whose upper end is hinged with driving mechanism.	SONG R	UNIV ZHEJIANG NINGBO TECHNOLOGY INST (NBLG-C)	2020771693	NOVELTY - The device has a stirring mechanism (1) for obtaining fluctuation tide of water in a harbor water area to rotate and stir sludge. A driving mechanism (2) is connected with the stirring mechanism for driving the stirring mechanism to do horizontal reciprocating motion. A dual-body ship (3) is parked on the harbor water area. The stirring mechanism is located in a dredging water area (4).…	Q42 (Hydraulic engineering, soil shifting and sewerage (E02, 3))	Q42-A02B; Q42-A10	E02B-003/02; E02F-005/28	CN111501884-A 07 Aug 2020 E02F-005/28 202068 Pages: 21 Chinese	CN111501884-A CN10368547 01 May 2020	CN10368547 01 May 2020	DIIDW:2020771693
72	P	US5929531-A	Power transmission mechanism of wind and tide powered hydroelectric plant for individual houses, large installations.	LAGNO W J	LAGNO W J (LAGN-Individual)	1999467854	NOVELTY - A pinion (38) is rotated meshing a vertical rack (18), when a buoyant concrete barge (12) is moved up and down due to tide. The rotation of pinion causes the gear and gear mechanism in gear box (32) to rotate, so that spring bank (34) is energized. A computer controls release of stored mechanical energy from spring bank to generator (36) which converts it to electrical energy.	Q55 (Positive displacement fluid machines/pumps/compressors (i.e. for driving fluid) (F04B,C)); X11 (Power Generation and High Power Machines); X15 (Non-Fossil Fuel Power Generating Systems)	X11-B09; X15-B	F03B-013/12	US5929531-A 27 Jul 1999 F03B-013/12 199939 Pages: 18 English	US5929531-A US858455 19 May 1997	US858455 19 May 1997	DIIDW:1999467854
73	P	CN114215674-A	Horizontal axis self-adaptive stable flow energy water turbine, has power generating unit connected with supporting structure unit through self-adaptive stable convection structure unit and provided with water turbine main body and generator.	ZHANG X	UNIV NORTHEAST NORMAL (UYNO-C)	202246851W	NOVELTY - The turbine has a power generating unit connected with a supporting structure unit through a self-adaptive stable convection structure unit and provided with a water turbine main body (1) and a generator (2). The water turbine main body is directly connected with a main shaft of the generator.	Q54 (Non-positive displacement fluid engines (i.e. driven by fluid); Miscellaneous motors and machines for producing mechanical power/thrust (F03B,D,G,H)); X15 (Non-Fossil Fuel Power Generating Systems)	Q54-X; Q54-A05; X15-C01	F03B-011/00; F03B-013/12; F03B-015/00; F03B-003/00	CN114215674-A 22 Mar 2022 F03B-003/00 202235 Chinese	CN114215674-A CN10056576 18 Jan 2022	CN10056576 18 Jan 2022	DIIDW:202246851W
74	P	CN211312403-U	Combined type hollow breakwater for use in offshore breeding field, has hollow wave blocking plate fixed on main beam, and hollow wave baffle plate, movable net sheet and fixed net sheet form rear end net cage structure.	LI X	UNIV LUDONG (UNLD-C)	2020832668	NOVELTY - The utility model claims a combined type hollow breakwater with power generation and breeding function, wherein it is composed of a lower supporting structure, a front power generation wave dissipation structure and a rear end net cage structure; the wave energy and tide energy of the wave facing surface can be transmitted to the rotating impeller of the front end generating wave dissip…	P14 (Animal management and care (A01K, L, M).); Q42 (Hydraulic engineering, soil shifting and sewerage (E02, 3)); Q54 (Non-positive displacement fluid engines (i.e. driven by fluid); Miscellaneous motors and machines for producing mechanical power/thrust (F03B,D,G,H)); X11 (Power Generation and High Power Machines);	P14-A01A; P14-A05; P14-E01C; Q42-A; Q54-X; X11-B; X15-C01B2; X15-C02	A01K-061/60; A01K-063/04; E02B-003/06; F03B-013/22; F03B-013/26	CN211312403-U 21 Aug 2020 E02B-003/06 202070 Pages: 9 Chinese	CN211312403-U CN21806699 25 Oct 2019	CN21806699 25 Oct 2019	DIIDW:2020832668
75	P	CN103266983-A; CN103266983-B	Movable blade-type tidal power generation device, has transmission wheel and rotating shaft connected with fixing bracket through fixing rod, and fixing rod and rotating shaft connected with guiding block.	CHEN C	UNIV QINGDAO TECHNOLOGY (UQDT-C)	2013V22885	NOVELTY - The device has a blade system provided with main blades (3, 12). The main blades are arranged at ends of telescopic blades (2, 11). Connecting plates (13) are connected with a guide block (9) that is connected with a guide shafts through a rotating shaft (7). A transmission wheel (6) and the rotating shaft are connected with a fixing bracket (5) through a fixing rod. The guide shafts ar…	Q54 (Non-positive displacement fluid engines (i.e. driven by fluid); Miscellaneous motors and machines for producing mechanical power/thrust (F03B,D,G,H)); X11 (Power Generation and High Power Machines); X15 (Non-Fossil Fuel Power Generating Systems)	X11-B01; X11-J05; X15-C02	F03B-013/26; F03B-003/14	CN103266983-A 28 Aug 2013 F03B-013/26 201377 Pages: 9 Chinese	CN103266983-A CN10223303 07 Jun 2013	CN10223303 07 Jun 2013	DIIDW:2013V22885
76	P	CN109356773-A; CN209083458-U; CN109356773-B	Self-powered marine rubbish collecting and classification platform, has air guide sleeves that are provided in wave-type collecting port and connected with central cylinder, and water inlet channel provided with classified rubbish bin.	WANG S	UNIV SHANGHAI OCEAN (USHO-C)	201919143P	NOVELTY - The platform has a rubbish filtering net (1) provided with an upper port. A lower part of the upper port is connected with a wave type collecting port (2). An outer side of the wave type collecting port is equipped with a rubbish net bag (3) that is formed in an annular structure, where outer diameter of the rubbish net bag is greater than diameter of the rubbish filtering net. The wave…	Q42 (Hydraulic engineering, soil shifting and sewerage (E02, 3)); Q54 (Non-positive displacement fluid engines (i.e. driven by fluid); Miscellaneous motors and machines for producing mechanical power/thrust (F03B,D,G,H)); X15 (Non-Fossil Fuel Power Generating Systems)	Q42-A; Q54-A05; Q54-X; X15-C01; X15-C02	E02B-015/08; F03B-013/14; F03B-013/26; F03B-003/12; F03B-003/18	CN109356773-A 19 Feb 2019 F03B-013/14 201930 Pages: 10 Chinese	CN109356773-A CN11406203 23 Nov 2018	CN11406203 23 Nov 2018	DIIDW:201919143P
77	P	CN212951038-U	Float-type self-generating identification device for water conservancy project, has chassis whose bottom part is provided with bottom floating floater, where inner side of mounting chute is provided with buffer dielectric elastomer.	WANG R	ANHUI YUXI WATER CONSERVANCY ENG CO LTD (ANHU-Non-standard)	202144535M	NOVELTY - The utility model claims a float type self-generating identification device for water conservancy project, comprising a chassis; the chassis is provided with an upper working box; the upper working box is fixedly connected with a supporting cavity; the supporting cavity is provided with a telescopic rod; the outer side of the telescopic rod is provided with a light identification flag; …	A95 (Transport - including vehicle parts, tyres and armaments.); A88 (Mechanical engineering and tools e.g. valves, gears and conveyor belts.); Q24 (Ships; waterborne vessels; related equipment (B63)); Q54 (Non-positive displacement fluid engines (i.e. driven by fluid); Miscellaneous motors and machines for producing mechanical power/thrust (F03B,D,G,H)); X15 (Non-Fossil Fuel Power Generating Sys…	A12-H; A12-T; Q24-P18; Q54-X; X15-C01; X15-C02	B63B-022/00; F03B-013/14; F03B-013/26	CN212951038-U 13 Apr 2021 B63B-022/00 202139 Pages: 8 Chinese	CN212951038-U CN21998327 14 Sep 2020	CN21998327 14 Sep 2020	DIIDW:202144535M
78	P	KR2114721-B1	Method for estimating amount of tidal current energy using a linear momentum actuator disk theory in a shallow water flow, involves deriving mathematical equation, and calculating water depth and flow velocity at over-position.	HWANG J	UNIV SEOUL NAT R & DB FOUND (USEO-C)	202045046V	NOVELTY - The method involves calculating a partial interpolation value using an upstream preservation variable interpolation module to interpolate an interpolation value. A scale of a to-be-applied LMADT to calculate reaction force of a turbine by a linear momentum actuator model execution module. A mathematical equation is derived. The mathematical equation is included with an ordinary differen…	T01 (Digital Computers)	T01-J04A; T01-J04D; T01-J15X	G06F-017/11; G06F-030/23	KR2114721-B1 25 May 2020 G06F-030/23 202048 Pages: 40	KR2114721-B1 KR017198 12 Feb 2020	KR017198 12 Feb 2020	DIIDW:202045046V
79	P	CN108361644-A; CN208074851-U	Multi-power beacon, has tide conversion part fixed at bottom part of base, and shell internally provided with impeller, where impeller and wind wheel are connected with generator by overrunning clutch in transmission manner.	REN Y	HENAN CHANGMING HANGBIAO ELECTROMECHANICAL EQUIP CO LTD (HENA-Non-standard)	201863714T	NOVELTY - The beacon has a lamp cap head (10) fixed at a top part of a base. A tide conversion part is fixed at a bottom part of the base. The base is provided with a generator (13) and a storage battery (14). The storage battery is electrically connected with the lamp cap head. The tide conversion part is provided with a shell that is provided with a cylindrical-shaped outer profile. The shell i…	Q71 (Lighting (F21)); X26 (Lighting)	Q71-A01; X26-D03	F21S-009/02; F21S-009/04; F21V-015/02	CN108361644-A 03 Aug 2018 F21S-009/04 201856 Pages: 6 Chinese	CN108361644-A CN10376519 25 Apr 2018	CN10376519 25 Apr 2018	DIIDW:201863714T
80	P	CN207598414-U	Tide and water flow based power generating system, has power generation main body formed with cavity for containing water, and generating device arranged in first drainage channel and/or second drainage channel for power generation.	WU G	XIAMEN LISI SCI & TECHNOLOGY CO LTD (XIAM-Non-standard)	201857239P	NOVELTY - The utility model claims a tide and water flow-generating system, relating to technical field of tidal power generation, comprising a generator main body and a power generation device, the power generation main body provided with a cavity for containing the water flow on the generator main body is provided with at least a first drainage passage flow into the cavity and at least a second…	Q54 (Non-positive displacement fluid engines (i.e. driven by fluid); Miscellaneous motors and machines for producing mechanical power/thrust (F03B,D,G,H)); X11 (Power Generation and High Power Machines); X15 (Non-Fossil Fuel Power Generating Systems)	Q54-X; X11-B; X15-C02	F03B-013/26	CN207598414-U 10 Jul 2018 F03B-013/26 201850 Pages: 10 Chinese	CN207598414-U CN21763617 15 Dec 2017	CN21763617 15 Dec 2017	DIIDW:201857239P
81	P	CN104731242-A	Computer host has temperature control device connected with microprocessor and power supply switch, and eating device formed as electric heating silk, where power supply switch is connected with power source in main machine box.	ZHANG T	XI'AN SINENG NETWORK TECHNOLOGY CO LTD (XIAN-Non-standard)	2015502052	NOVELTY - The host has a rectangular heating plate (2) whose center is connected with a heating device (3). An inner side of the heating plate is connected with a temperature sensor (9). An upper end of a main machine box (1) is connected with a power supply switch (5). A temperature control device (6) is connected with a microprocessor (7) and the switch. The switch is connected with a power sou…	T01 (Digital Computers); U14 (Memories, Film and Hybrid Circuits); X25 (Industrial Electric Equipment)	T01-L01; T01-L02A; U14-K01; X25-B04	G06F-001/16	CN104731242-A 24 Jun 2015 G06F-001/16 201562 Pages: 5 Chinese	CN104731242-A CN10708965 20 Dec 2013	CN10708965 20 Dec 2013	DIIDW:2015502052
82	P	CN103953003-A; CN103953003-B	Sea reclamation blood silt deposition-promoting dam, has center area matched with time delay expanding dam unit that is formed with promoting stasis area, where promoting stasis area is filled with water by single-way gate.	ZHAO Q	SECOND INST OCEANOGRAPHY SOA (GJHY-C)	2014S81944	NOVELTY - The dam has a center coastline formed with a center area. Two edge sides of a center dam body are connected with a single-way gate. The center area is filled with water by the single-way gate. A front side of a bank center is connected with a single-way water energy generating device. An outer side of the energy generating device is connected with the dam body. The center area is matche…	Q42 (Hydraulic engineering, soil shifting and sewerage (E02, 3))		E02B-003/10; E02B-003/18	CN103953003-A 30 Jul 2014 E02B-003/18 201468 Pages: 8 Chinese	CN103953003-A CN10210193 16 May 2014	CN10210193 16 May 2014	DIIDW:2014S81944
83	P	CN115076018-A; CN115076018-B	Self-lifting lever type tidal power generating device, has three-stage lifting rod whose bottom is anchored on seabed, and electric energy emitted by oscillation floater-generating device is conveyed by submarine cable.	XU S	UNIV JIANGSU SCI & TECHNOLOGY (UYJG-C)	2022C28221	NOVELTY - The self-lifting lever type tidal power-generating device has a three-stage lifting rod (12) whose bottom is anchored on the seabed. A hemispherical floating body (11) is connected with the top unit-stage lifting rod through the ball hinge and rises and falls along with tide fluctuation. A lever system comprises a ball buckle (21), a lever (22) that is connected with the hemispherical f…	Q54 (Non-positive displacement fluid engines (i.e. driven by fluid); Miscellaneous motors and machines for producing mechanical power/thrust (F03B,D,G,H)); X15 (Non-Fossil Fuel Power Generating Systems)	Q54-X; X15-C02	F03B-011/00; F03B-013/00; F03B-013/26	CN115076018-A 20 Sep 2022 F03B-013/26 202281 Chinese	CN115076018-A CN10639591 08 Jun 2022	CN10639591 08 Jun 2022	DIIDW:2022C28221
84	P	CN203515945-U	Floating type tide power station impeller transmission mechanism, has transmission shaft whose outer side is fixed with seal tube, where seal tube is connected with upper end of fixing base and lower end of fixing base.	LI F	DAISHAN SCI & TECHNOLOGY DEV CENT (DAIS-Non-standard)	2014K17667	NOVELTY - This utility new type claims a floating type tide power station one impeller transmission mechanism, include upper fixed gear box and the impeller shaft, the impeller shaft is fixed with an impeller, an impeller shaft of upper end and the gear box input shaft end and set with transmission shaft, an impeller include upper and lower impeller an impeller, impeller, upper lower impeller thr…	Q54 (Non-positive displacement fluid engines (i.e. driven by fluid); Miscellaneous motors and machines for producing mechanical power/thrust (F03B,D,G,H)); X15 (Non-Fossil Fuel Power Generating Systems)	X15-C02	F03B-013/26	CN203515945-U 02 Apr 2014 F03B-013/26 201434 Pages: 7 Chinese	CN203515945-U CN20559180 10 Sep 2013	CN20559180 10 Sep 2013	DIIDW:2014K17667
85	P	IN201100916-I2	Unique system of electric power generation by help of ocean tidal energy and gravitational energy.	BAGH R K	BAGH R K (BAGH-Individual)	2011K74317	NOVELTY - The process for minimizing the problem of electric power generation, involves the steps including: combine utilization of ocean tide, and gravitational force can generates a huge power by specially design tank and process. From the sketch-1 the process is explained in brief:- 1. when the ocean is in high tide position, water from ocean will enter the primary tank through tunnels and loc…	X15 (Non-Fossil Fuel Power Generating Systems)	X15-C02; X15-J	H02N-006/00	IN201100916-I2 12 Aug 2011 H02N-006/00 201155 Pages: 0 English	IN201100916-I2 INKO00916 08 Jul 2011	INKO00916 08 Jul 2011	DIIDW:2011K74317
86	P	KR2024080184-A	Tidal and wave power fusion power generation device, has variable blades equipped with one-way clutches in front and rear sides of interlocking shafts that are configured to perform drive rotation in opposite directions.	WHANG Y A	WHANG Y A (WHAN-Individual)	202458240L	NOVELTY - The device has a generator (101) and a float (107) installed on top of a frame (108) anchored to a seabed by a mooring line (109). Multiple float levers (106) are equipped with one-way clutches, and are driven and rotated only when the float is raised. Variable blades (105b) are equipped in front and rear sides of interlocking shafts. The variable blades form a parabolic surface made of…	Q54 (Non-positive displacement fluid engines (i.e. driven by fluid); Miscellaneous motors and machines for producing mechanical power/thrust (F03B,D,G,H)); X11 (Power Generation and High Power Machines); X15 (Non-Fossil Fuel Power Generating Systems)	Q54-X; X11-B01; X11-J05; X15-C01; X15-C02	F03B-011/00; F03B-013/12	KR2024080184-A 05 Jun 2024 F03B-013/12 202448 Pages: 10	KR2024080184-A KR056057 25 Apr 2024	KR056057 25 Apr 2024	DIIDW:202458240L
87	P	CN116732949-A	System for replenishing water and changing water through multi-gate joint control, has surge channels set on river channel and placed between first and second control gate assemblies, where upstream first control gate component is closed.	DUAN X	CHINA CONSTR FIFTH ENG DIV CORP LTD (CSCE-C)	2023984577	NOVELTY - The system has a first control gate assembly and a second control gate component respectively fixed on an upstream section and a downstream section of a river channel (1). Multiple surge channels are fixed on the river channel and placed between the first control gates and the second control gages. The upstream first gates are opened when tide rises. The downstream second gate is closed…	Q42 (Hydraulic engineering, soil shifting and sewerage (E02, 3))	Q42-A02A	E02B-008/04	CN116732949-A 12 Sep 2023 E02B-008/04 202377 Chinese	CN116732949-A CN10211364 07 Mar 2023	CN10211364 07 Mar 2023	DIIDW:2023984577
88	P	CN114687912-A; CN114687912-B	Low flow speed ocean current energy generating device has piezoelectric ceramic sheet that is arranged on frame at position corresponding to impact rod, and striking rod can strike piezoelectric ceramic sheet.	CAI W	GUANGZHOU MARITIME INST (GUAN-Non-standard)	202290075N	NOVELTY - The device has an impact assembly that includes a linear guide rail (4), a fixing portion (5), a striking rod and an elastic portion (7), and the linear guide rail is arranged at the top end of a frame (1). The fixing portion is slidably arranged on the linear guide rail. The two ends of the elastic portion are respectively connected with the top end of the fixing portion and the inner …	Q54 (Non-positive displacement fluid engines (i.e. driven by fluid); Miscellaneous motors and machines for producing mechanical power/thrust (F03B,D,G,H)); X11 (Power Generation and High Power Machines); X15 (Non-Fossil Fuel Power Generating Systems)	Q54-X; X11-J05B; X11-J05A; X11-B01; X15-C02	F03B-013/00; F03B-013/26; H02K-007/10; H02K-007/18; H02N-002/18	CN114687912-A 01 Jul 2022 F03B-013/00 202261 Chinese	CN114687912-A CN10435207 24 Apr 2022	CN10435207 24 Apr 2022	DIIDW:202290075N
89	P	CN112594123-A; CN112594123-B	Water conservancy project construction-based tidal power generation system, has T-shaped dam provided with driving mechanism and warning mechanism, and rotating cavity including inner wall provided with lifting mechanism for salvaging waste.	PENG Y	PENG Y (PENG-Individual)	202136085B	NOVELTY - The system has a lifting block whose end is fixedly connected with a traction rope. An upper end of a rotating shaft in the traction rope is fixedly connected with a transmission belt wheel. Five connecting belt wheels are driven by a belt. A T-shaped dam is provided with a driving mechanism for providing power and provided with a warning mechanism for providing tide-rising information.…	Q54 (Non-positive displacement fluid engines (i.e. driven by fluid); Miscellaneous motors and machines for producing mechanical power/thrust (F03B,D,G,H)); X11 (Power Generation and High Power Machines); X15 (Non-Fossil Fuel Power Generating Systems)	Q54-X; X11-B01; X15-C02	F03B-011/00; F03B-011/02; F03B-011/08; F03B-013/26	CN112594123-A 02 Apr 2021 F03B-013/26 202133 Pages: 14 Chinese	CN112594123-A CN10009576 05 Jan 2021	CN10009576 05 Jan 2021	DIIDW:202136085B
90	P	GB2498652-A; WO2013108033-A2; WO2013108033-A3; CA2860853-A1; EP2819916-A2; JP2015504026-W; CN104203739-A	Multi-hulled vessel for installing sub-surface assets in strong current environments, has control system that is connected to propulsion system to control operation of propulsion devices so as to position hulls.	PARKISON R	MOJO MARITIME LTD (MOJO-Non-standard)	2013L91775	NOVELTY - The multi-hulled vessel (2) has a propulsion system consisting of propulsion devices (6) at respective end regions of the hulls (4). A control system is connected to the propulsion system to control the operation of the propulsion devices so as to position the hulls. The propulsion devices are angled relative to the vertical longitudinally of each hull.	H01 (Obtaining crude oil and natural gas - including exploration, drilling, well completion, production and treatment. General off-shore platform and drilling technology is included together with the treatment of tar sands and oil shales (C10G, E21B).); W06 (Aviation, Marine and Radar Systems)	H01-B03C; W06-A05H3; W06-C09	B63B-001/10; B63C-011/48; B63G-007/00; B63H-025/42; G01S-015/87; G01S-015/89; B63B-001/12; B63B-035/00; B63B-035/04; B63B-049/00; B63G-008/39; B63H-025/38	GB2498652-A 24 Jul 2013 B63B-001/10 201352 Pages: 28 English	GB2498652-A GB000875 17 Jan 2013	GB000841 18 Jan 2012	DIIDW:2013L91775
91	P	EP3978153-A1; WO2022069326-A1; TW202218760-A; CA3197341-A1; KR2023077747-A; AU2021353454-A1; IN202347030322-A; BR112023006054-A2; CN116348373-A; EP4221907-A1; JP2023540389-W; VN96847-A; US2023364659-A1; JP7395060-B2; HK40088048-A0; EP4221907-B1; EP4221907-C0	Anti-fouling unit for being arranged on surface of marine object, has light-emitting arrangement of electric circuit for subjecting exterior side of emission surface and surroundings to action at position of active slab zone.	HIETBRINK R B	KONINK PHILIPS NV (PHIG-C)	2022484049	NOVELTY - The anti-fouling unit (1) has an electric circuit (30) including a light-emitting arrangement (31) to emit anti-fouling light, and a plate-shaped carrier slab (40) carrying the electric circuit. The carrier slab has an emission surface to allow light from the arrangement to pass to outside of the unit and to subject an exterior side of the emission surface and surroundings of the surfac…	P43 (Sorting, cleaning, waste disposal (B06, B07, B08, B09).); W06 (Aviation, Marine and Radar Systems); X15 (Non-Fossil Fuel Power Generating Systems)	P43-B08; P43-U03; P43-U05; W06-C01C; W06-C07A; X15-B01A; X15-B03; X15-B06; X15-C02	B08B-017/02; B63B-059/04; F21V-023/02; A61L-002/10; F21V-023/00; F21W-107/20; F21Y-105/16; B01J-019/00; C09D-005/16; G06Q-020/34; H04N-005/357	EP3978153-A1 06 Apr 2022 B08B-017/02 202231 Pages: 21 English	EP3978153-A1 EP199835 02 Oct 2020	EP199835 02 Oct 2020	DIIDW:2022484049
92	P	CN117967487-A	New energy marine anti-corrosion power generation device i.e. ocean wave generator, has pipeline that is provided with circulating cavity, where upper side of right end wall of cavity is provided with air port, and lower side of left end wall of cavity is provided with water flowing port.	HU Y	JINCHENG ENERGY SHANGHAI CO LTD (JINC-Non-standard)	202452072D	NOVELTY - The device has a base (53) that is fixedly arranged at the seabed. The upper end surface of the base is fixedly provided with a pipeline (11). The pipeline is provided with a circulating cavity (30). The upper side of the right end wall of the circulating cavity is provided with an air port (27). The lower side of the left end wall of the circulating cavity is provided with a water flow…	P43 (Sorting, cleaning, waste disposal (B06, B07, B08, B09).); V06 (Electromechanical Transducers and Small Machines); W06 (Aviation, Marine and Radar Systems); X15 (Non-Fossil Fuel Power Generating Systems); X11 (Power Generation and High Power Machines)	P43-B99; V06-M10; W06-C07A; X15-C01; X11-B; X11-J05B; X11-U05	B08B-001/12; B08B-001/30; B08B-001/34; B08B-001/52; F03B-013/24; F16M-011/04; F16M-011/16; H02K-007/18	CN117967487-A 03 May 2024 F03B-013/24 202442 Chinese	CN117967487-A CN10046188 12 Jan 2024	CN10046188 12 Jan 2024	DIIDW:202452072D
93	P	WO2021205056-A1; EP4133173-A1; EP4133173-A4	Coupling arrangement in wave energy recovery apparatus, has coupling that comprises element comprising area that is arranged to elastically bend under strain caused by motion of panel.	KORTELAINEN V	AW-ENERGY OY (AWEN-Non-standard)	2021B66034	NOVELTY - The coupling arrangement (5) has a reciprocating panel that is provided with a pivot shaft (2a) and a power-take-off (PTO) unit is provided with a primary shaft (4a). A coupling comprises a first portion (5a) is connected the pivot shaft of the panel and a second portion (5b) is connected to the primary shaft of the PTO unit. The coupling comprises element comprising an area that is arr…	Q42 (Hydraulic engineering, soil shifting and sewerage (E02, 3)); Q54 (Non-positive displacement fluid engines (i.e. driven by fluid); Miscellaneous motors and machines for producing mechanical power/thrust (F03B,D,G,H)); Q63 (Couplings; clutches; brakes; springs; dampers (F16D,F)); X15 (Non-Fossil Fuel Power Generating Systems)	Q42-A03; Q54-X; Q63-A03; X15-C01; X15-C02	E02B-009/08; F03B-013/18; F16D-003/50; F16D-003/74	WO2021205056-A1 14 Oct 2021 F03B-013/18 202185 Pages: 36 English	WO2021205056-A1 WOFI050230 07 Apr 2020	EP930379 07 Apr 2020	DIIDW:2021B66034
94	P	EP2540683-A1; WO2013000863-A1; EP2726430-A1; CN103702957-A; US2014370266-A1; IN201400191-P4; EP2726430-B1; RU2013155541-A; ES2545000-T3; RU2599288-C2; CN103702957-B; RU2599288-C9; BR112013033732-A2; US9834474-B2; IN305164-B; BR112013033732-B1	Sizing composition, useful for sizing glass fibers which are useful in composite materials for e.g. automotives including e.g. aerospace and marine, comprises a silane based coupling agent, film former, a borate and a lubricant.	PIRET W	3B FIBREGLASS SPRL (THRE-Non-standard)	2013A21658	NOVELTY - Sizing composition comprises: a silane based coupling agent; a film former; a borate; and a lubricant, where at least 75 wt.% of the silane coupling agent present in the composition is dialkoxylated and is not an aminosilane.	A97 (Miscellaneous goods not specified elsewhere - including papermaking, gramophone records, detergents, food and oil well applications.); A86 (Fancy goods, games, sports, toys.); A88 (Mechanical engineering and tools e.g. valves, gears and conveyor belts.); A95 (Transport - including vehicle parts, tyres and armaments.); ; X15 (Non-Fossil Fuel Power Generating Systems)	A08-M; A08-M01D; A08-M10; A12-S08B; L01-F03A; L01-F03B; L01-L02; X15-B01A3; X15-B04; X15-C02	C03C-025/36; C03C-025/40; C08J-005/08; C08K-005/5419; C03C-025/26; C08J-005/24; C08K-007/14; C08K-009/06	EP2540683-A1 02 Jan 2013 C03C-025/36 201304 Pages: 14 English	EP2540683-A1 EP171653 28 Jun 2011	EP171653 28 Jun 2011	DIIDW:2013A21658
95	P	CN111486895-A; CN111486895-B	Multi-functional self-powered marine disaster prevention and monitoring structure, has sensor pushing containing component connected with limiting sliding rods, where end unit of limiting sliding rods is provided with sensor assembly.	YANG M	YANG M (YANG-Individual)	202075913Y	NOVELTY - The structure has a dual-head motor driving component whose output ends provided with a marine animal driving component and a sensor pushing containing component. An outer side of the sensor pushing containing component is provided with a limiting cylinder. A bottom unit of the limiting cylinder is provided with a containing protective disk (17). An inner side of the containing protecti…	Q54 (Non-positive displacement fluid engines (i.e. driven by fluid); Miscellaneous motors and machines for producing mechanical power/thrust (F03B,D,G,H)); S02 (Engineering Instrumentation); X15 (Non-Fossil Fuel Power Generating Systems)	Q54-G; Q54-X; S02-K01; X15-B01; X15-C02; X15-C03	F03B-013/26; F03D-009/11; G01D-021/02; H04L-029/08	CN111486895-A 04 Aug 2020 G01D-021/02 202067 Pages: 19 Chinese	CN111486895-A CN10296216 15 Apr 2020	CN10296216 15 Apr 2020	DIIDW:202075913Y
96	P	CN217107297-U	Siphon tidal generating device, has connecting pipeline composed of first pipeline, second pipeline and third pipeline sequentially connected to form inverted U-shaped structure, where connecting pipeline is provided with turbine generating device.	WANG Z	WANG Z (WANG-Individual)	2022A3222J	NOVELTY - The utility model claims a siphon tidal generating device, comprising a connecting pipeline, the connecting pipeline is composed of a first pipeline, the second pipeline and the third pipeline sequentially connected to form an inverted U-shaped structure, the first pipeline end is provided with a first valve, the second pipeline is further connected with a water injection pipe, the wate…	Q54 (Non-positive displacement fluid engines (i.e. driven by fluid); Miscellaneous motors and machines for producing mechanical power/thrust (F03B,D,G,H)); X11 (Power Generation and High Power Machines); X15 (Non-Fossil Fuel Power Generating Systems)	Q54-X; X11-B01; X15-C02	F03B-013/26; F03B-013/08	CN217107297-U 02 Aug 2022 F03B-013/08 202265 Chinese	CN217107297-U CN20588635 17 Mar 2022	CN20588635 17 Mar 2022	DIIDW:2022A3222J
97	P	CN109098917-A	Ocean power energy generating device, has swinging motor whose input shaft is connected with rotating shaft, impeller arranged on outer large diameter end of shell, and tail wing located in outer small diameter end of shell.	YU Q	UNIV NINGBO (UYNB-C)	201903059G	NOVELTY - The device has a pile body (1) whose lower end is connected with a water body. A floating body (2) floats on the water body. A water turbine group is connected with a bracket (4) for fixing the pile body. A cross section of the pile body is provided with a limiting plate (5). An outer wall of the pile body is provided with multiple chutes along vertical direction. The pile body is coaxi…	Q54 (Non-positive displacement fluid engines (i.e. driven by fluid); Miscellaneous motors and machines for producing mechanical power/thrust (F03B,D,G,H)); X15 (Non-Fossil Fuel Power Generating Systems)	Q54-G; Q54-X; X15-B01A; X15-C01	F03B-013/10; F03B-013/14; F03B-017/06; F03D-009/11	CN109098917-A 28 Dec 2018 F03B-013/10 201915 Pages: 7 Chinese	CN109098917-A CN11124049 26 Sep 2018	CN11124049 26 Sep 2018	DIIDW:201903059G
98	P	CN206319990-U	Vertical shaft tide change line characteristic based current energy generating device has speed sensor that is electrically connected with controller which is electrically connected with storage battery and energy conversion system.	CHEN X	JIANGSU MARITIME INST (JIAG-C)	2017485158	NOVELTY - The utility model relates to a vertical shaft tidal power generating device based on current change line characteristic, comprising a fixing base, an energy absorbing system, energy conversion system, power output system and an auxiliary system, the fixing base is composed of a base, a sleeve, platform, said air guide sleeve is set between the base and the platform, the energy absorptio…	Q54 (Non-positive displacement fluid engines (i.e. driven by fluid); Miscellaneous motors and machines for producing mechanical power/thrust (F03B,D,G,H)); X11 (Power Generation and High Power Machines); X15 (Non-Fossil Fuel Power Generating Systems); X16 (Electrochemical Storage)	Q54-A05; Q54-X; X11-B01; X11-B10; X11-J05; X15-C02; X16-B01	F03B-013/26; F03B-015/00; F03B-003/12; F03B-003/18	CN206319990-U 11 Jul 2017 F03B-013/26 201749 Pages: 9 Chinese	CN206319990-U CN21436681 26 Dec 2016	CN21436681 26 Dec 2016	DIIDW:2017485158
99	P	CN101666287-A; CN101666287-B	Bidirectional tide machine, has machine main body mounted on large dam, machine main body provided with electric machine, and water wheel equipped with S-shaped blades whose angles are controlled by oil receiver.	CHEN K	HANGZHOU INST MECHANICAL DESIGN MIN WATER RESOURCES (HANG-Non-standard)	2010D19848	NOVELTY - The machine has a machine main body (1) mounted on a large dam (13) between a reservoir and a seawater unit by a tubular substrate (6) and positioned in a flow passage. The machine main body is provided with an electric machine. The water wheel and the electric machine are connected by a spindle (3). The spindle of a water wheel (2) is mounted on a guide bearing (4) and a combined beari…	Q54 (Non-positive displacement fluid engines (i.e. driven by fluid); Miscellaneous motors and machines for producing mechanical power/thrust (F03B,D,G,H)); X11 (Power Generation and High Power Machines); X15 (Non-Fossil Fuel Power Generating Systems)	X11-B01; X15-C02	F03B-013/26	CN101666287-A 10 Mar 2010 F03B-013/26 201026 Pages: 8 Chinese	CN101666287-A CN10120451 04 Sep 2008	CN10120451 04 Sep 2008	DIIDW:2010D19848
100	P	CN101581267-A; CN101581267-B	Ocean tides drive device for power generation, has one-way driver and sliding synchronizer that are installed with each other, and sliding wheel whose input is in drive connection with power output end for driving generator via driver.	MA K	MA K (MAKK-Individual)	2009R78546	NOVELTY - The device has guide pillars (1, 2) vertically fixed under bottom of water. A floating box (6) floats on wave along the guide pillars. Sliding wheels (11-14) are fixed in the floating box via input shafts (3, 4) and a bracket. The sliding wheels are engaged with the guide pillars. The input shafts and the bracket are installed at two sides of a guide rail and rotate in opposite directio…	Q54 (Non-positive displacement fluid engines (i.e. driven by fluid); Miscellaneous motors and machines for producing mechanical power/thrust (F03B,D,G,H)); Q63 (Couplings; clutches; brakes; springs; dampers (F16D,F)); X11 (Power Generation and High Power Machines); X15 (Non-Fossil Fuel Power Generating Systems)	X11-B; X15-C01; X15-C02	F03B-013/12; F03B-013/16; F16D-041/00	CN101581267-A 18 Nov 2009 F03B-013/12 200981 Pages: 7 Chinese	CN101581267-A CN10024891 13 May 2008	CN10024891 13 May 2008	DIIDW:2009R78546
101	P	CN115853700-A	Double hydrofoil piezoelectric tidal power generating device has multiple plectrums used for generating interaction with piezoelectric vibrator under driving of first linear acting hydraulic cylinder or second linear acting hydraulic cylinder to move up and down.	XIE Y	UNIV SHANDONG (USHA-C)	2023364548	NOVELTY - The device has first linear acting hydraulic cylinder (1) and first guide rail (5) arranged in parallel. First hydrofoil (4) is connected between the first linear acting hydraulic cylinder and the first guide rail through first swinging hydraulic cylinder (3). Second linear acting hydraulic cylinder (9) and second guide rail (13) are arranged in parallel. Second hydrofoil is connected b…	A88 (Mechanical engineering and tools e.g. valves, gears and conveyor belts.); Q54 (Non-positive displacement fluid engines (i.e. driven by fluid); Miscellaneous motors and machines for producing mechanical power/thrust (F03B,D,G,H)); V06 (Electromechanical Transducers and Small Machines); X15 (Non-Fossil Fuel Power Generating Systems)	A12-H; A12-E15; Q54-A05; Q54-X; V06-V01E; V06-V04C; X15-C02	F03B-013/26; F03B-003/12; H02J-007/32; H02N-002/18	CN115853700-A 28 Mar 2023 F03B-013/26 202331 Chinese	CN115853700-A CN11412163 11 Nov 2022	CN11412163 11 Nov 2022	DIIDW:2023364548
102	P	CN114858408-A; CN114858408-B	Test device for water wing dynamic oscillation performance test, has pressure pulsation sensor mounting groove installed with vortex generator, and airfoil group main portion and airfoil component portion provided with pressure pulsation sensor mounting grooves along wing-shaped chord direction.	HE W	UNIV ZHEJIANG (UYZH-C)	2022A40549	NOVELTY - The device has an airfoil component portion (82) detachably embedded in a groove opened on the suction surface of an airfoil group main portion (81). An airfoil group cover plate (83) located on the side fixes the airfoil component portion in the groove of the airfoil group main portion. The airfoil group main portion, the wing-shaped component portion and the wing-shaped cover plate fo…	S01 (Electrical Instruments); S02 (Engineering Instrumentation)	S01-J09; S02-J08; S02-J07; S02-F07; S02-F04	G01L-025/00; G01M-010/00; G01M-007/02	CN114858408-A 05 Aug 2022 G01M-010/00 202283 Chinese	CN114858408-A CN10176582 25 Feb 2022	CN10176582 25 Feb 2022	DIIDW:2022A40549
103	P	WO2012022825-A1; CA2807451-A1; AU2010359170-A1; EP2606223-A1; US2013167523-A1; JP2013534293-W; IN201300638-P2; ZA201301838-A; JP5860051-B2; AU2010359170-B2; CA2807451-C; US9752551-B2; EP2606223-A4; BR112013003566-A2; EP2606223-B1; BR112013003566-B1; IN407890-B	Arrangement for surface area adjustment of reciprocating wing system in wave energy recovery system for collecting maximum wave energy for producing electric energy, has adjustment unit for adjusting surface area of wings.	JAERVINEN A	AW-ENERGY OY (AWEN-Non-standard)	2012C48801	NOVELTY - The arrangement has an adjustment unit for adjusting a total effective surface area of a set of plate-like wings (3a) of a wave energy recovery system. A movement control unit (10) controls change of the total effective surface area and/or a vertical position of the wings. A detector unit (11) recognizes prevailing ocean conditions and is connected to a control system of the wave energy…	Q54 (Non-positive displacement fluid engines (i.e. driven by fluid); Miscellaneous motors and machines for producing mechanical power/thrust (F03B,D,G,H)); X15 (Non-Fossil Fuel Power Generating Systems)	X15-C01; X15-C02	F03B-013/18; F03B-015/00; F03B-013/12; F03B-000/00; F03B-013/22; F03B-017/06	WO2012022825-A1 23 Feb 2012 F03B-013/18 201216 Pages: 24 English	WO2012022825-A1 WOFI050653 18 Aug 2010	AU359170 18 Aug 2010	DIIDW:2012C48801
104	P	US2023417214-A1; US11913423-B2	System for harnessing kinetic energy of ocean to generate electricity, has dock for moving up and down relative to pillars by kinetic energy of ocean, where movement of dock relative to upstanding pillar results in generation of electricity.	BROOKS N	BROOKS N (BROO-Individual)	2024002539	NOVELTY - The system (100) has a dock made from a buoyant material and provided with floats (120). Each float has a central aperture, and comprises permanent magnets or a conductive coil. A set of upstanding pillars (110) comprises the permanent magnets. The dock moves up and down relative to the pillars by the kinetic energy of an ocean, where either of the float and the respective pillar has th…	Q54 (Non-positive displacement fluid engines (i.e. driven by fluid); Miscellaneous motors and machines for producing mechanical power/thrust (F03B,D,G,H)); X15 (Non-Fossil Fuel Power Generating Systems)	Q54-X; X15-C01; X15-C02	F03B-013/18	US2023417214-A1 28 Dec 2023 F03B-013/18 202404 English	US2023417214-A1 US949195 20 Sep 2022	US355205P 24 Jun 2022	DIIDW:2024002539
105	P	CN112352746-A	Device for capturing and collecting fish shell by using tide as power, has torsion sleeve connected with torsion sleeve connection blocks, where each block is connected with torsion toggle shaft that is connected with torsion cam.	YANG J	JINYUN TAIXING ELECTRONIC TECHNOLOGY CO (JINY-Non-standard)	202118501E	NOVELTY - The device has a control shaft block fixed in a control shaft control cavity, and for extending into a fishing sleeve groove. A lower end surface of the control shaft block is fixedly connected with a control shaft pull rope. The fishing sleeve through hole is internally provided with a fishing rod. A lower end of the fishing rod is fixedly connected with a torsion connecting ball that …	P14 (Animal management and care (A01K, L, M).); Q54 (Non-positive displacement fluid engines (i.e. driven by fluid); Miscellaneous motors and machines for producing mechanical power/thrust (F03B,D,G,H)); X15 (Non-Fossil Fuel Power Generating Systems)	P14-B02; P14-E01C; Q54-X; X15-C02	A01K-080/00; F03B-013/26	CN112352746-A 12 Feb 2021 A01K-080/00 202121 Pages: 14 Chinese	CN112352746-A CN11331190 24 Nov 2020	CN11331190 24 Nov 2020	DIIDW:202118501E
106	P	CN109899220-A	Water energy power conversion device, has rotating device whose water inlet is connected with water inlet switch through water outlet pipeline, and power input shaft connected with transmission device and rotating device.	XU X	XU X (XUXX-Individual)	201956248P	NOVELTY - The device has a barrier wall (1) whose water inlet face is provided with a block notch. A lower end of the block notch is formed with a control facility transporting channel (1-2). An upper end of an adjusting plate (10) is located at the control facility transporting channel. A side of a tank (2) is connected to the barrier wall. A water inlet switch (3) is located at a bottom part of…	Q54 (Non-positive displacement fluid engines (i.e. driven by fluid); Miscellaneous motors and machines for producing mechanical power/thrust (F03B,D,G,H)); X15 (Non-Fossil Fuel Power Generating Systems)	Q54-X; X15-C02	F03B-013/26; F03B-015/00; F03B-011/00	CN109899220-A 18 Jun 2019 F03B-013/26 201960 Pages: 6 Chinese	CN109899220-A CN11302017 10 Dec 2017	CN11302017 10 Dec 2017	DIIDW:201956248P
107	P	CN204610137-U	Tidal power generation flashlight has sliding rail which is arranged vertical to groove opening and box while dual gear and gear unit is connected to generator, and box whose bottom portion is provided with pitching pile.	ZHANG X	ZHANG X (ZHAN-Individual)	2015635533	NOVELTY - The utility model claims a a a a tidal power generation flashlight comprises flashlight main body, box body and is set with in out side wall of gear generator, a box body internal box set with a hole way, double gear and connect part... in a way of, the out side of box wall formed with a vertical sliding rail slide way and a position corresponding to the vertical sliding rail of two rel…	Q54 (Non-positive displacement fluid engines (i.e. driven by fluid); Miscellaneous motors and machines for producing mechanical power/thrust (F03B,D,G,H)); ; X11 (Power Generation and High Power Machines); X15 (Non-Fossil Fuel Power Generating Systems); X26 (Lighting)	Q71-A01; X11-B; X15-C02; X26-E01A	F03B-013/26	CN204610137-U 02 Sep 2015 F03B-013/26 201572 Pages: 7 Chinese	CN204610137-U CN20210956 09 Apr 2015	CN20210956 09 Apr 2015	DIIDW:2015635533
108	P	WO2014030882-A2; KR2014026254-A; WO2014030882-A3; KR1456527-B1	Aquatic floating power plant, has anchor arranged at bottom of sea and fixed to anchor ropes, where anchor ropes are fixed with corpus glandular part that is rotated with screw by applying of ocean current.	KIM D H	KIM D H (KIMD-Individual)	2014D75128	NOVELTY - The power plant (100) has an anchor (91) arranged at bottom of sea (1) and fixed to anchor ropes (90). The anchor ropes are formed with a hull-shaped structure for maintaining a floating state. The anchor ropes are fixed with a corpus glandular part (10) that is in rectangular-shaped structure. The corpus glandular part is rotated with a screw by applying of ocean current. An electric p…	Q54 (Non-positive displacement fluid engines (i.e. driven by fluid); Miscellaneous motors and machines for producing mechanical power/thrust (F03B,D,G,H)); X11 (Power Generation and High Power Machines); X15 (Non-Fossil Fuel Power Generating Systems)	X11-B; X15-C02	F03B-013/26; F03B-017/06	WO2014030882-A2 27 Feb 2014 F03B-017/06 201417 Pages: 9	WO2014030882-A2 WOKR007368 16 Aug 2013	KR092250 23 Aug 2012	DIIDW:2014D75128
109	P	CN207454165-U	Generator, has rotating shaft whose end is connected with clutch through transmission rod, and fixing bracket provided with floating body, where another end of rotating shaft is connected with impeller blade angle deflecting device.	LIU C	LIU C (LIUC-Individual)	201845800A	NOVELTY - A generator provided by this utility model, comprising a hull and deck, the deck of the ship is provided with a master control room, a generator, a control clutch, the rotational speed controller, an outer cover, a drainage pump, a cover set on the ship deck; controlling the clutch is set on the end of the generator and the rotating shaft is connected with the generator, located below t…	Q24 (Ships; waterborne vessels; related equipment (B63)); Q54 (Non-positive displacement fluid engines (i.e. driven by fluid); Miscellaneous motors and machines for producing mechanical power/thrust (F03B,D,G,H)); X15 (Non-Fossil Fuel Power Generating Systems)	Q24-P08; Q54-X; X15-C01	B63B-035/44; F03B-013/16; F03B-015/00	CN207454165-U 05 Jun 2018 F03B-013/16 201841 Pages: 5 Chinese	CN207454165-U CN21134292 31 Aug 2017	CN21134292 31 Aug 2017	DIIDW:201845800A
110	P	CN107956630-A; CN107956630-B	Swing type wave power generation device, has swinging arm whose lower end is hinged with blade assembly and end of swinging arm is connected with end of energy transfer mechanism to drive generator for generating electricity.	ZHUANG X	ZHUANG X (ZHUA-Individual)	201832987L	NOVELTY - The device has a bracket whose two ends are respectively fixed with a vane assembly and a swinging arm. A lower end of the swinging arm is hinged with a blade assembly. An end of the swinging arm is connected with an end of an energy transfer mechanism to drive a generator for generating electricity. The vane assembly is provided with a fixing frame. The fixing frame is arranged with an…	Q54 (Non-positive displacement fluid engines (i.e. driven by fluid); Miscellaneous motors and machines for producing mechanical power/thrust (F03B,D,G,H)); X11 (Power Generation and High Power Machines); X15 (Non-Fossil Fuel Power Generating Systems)	Q54-X; X11-B01; X11-J05; X15-C01	F03B-011/00; F03B-013/18	CN107956630-A 24 Apr 2018 F03B-013/18 201831 Pages: 12 Chinese	CN107956630-A CN11251476 01 Dec 2017	CN11251476 01 Dec 2017	DIIDW:201832987L
111	P	KR1081428-B1	Power generation machine structure for use with water wheel, comprises circulation housing, and fixing casing, which is fixed in underwater by separate fixing unit for covering circulation housing.	HYOUNG J K	HYOUNG J K (HYOU-Individual)	2011Q06860	NOVELTY - The power generation machine structure comprises a circulation housing (10), and a fixing casing (40), which is fixed in the underwater by a separate fixing unit for covering the circulation housing. A guide projection (11) is projected in the warped surface of the circulation housing in spiral shape. A supporting rotation axis (20) is provided, which passes through the inside of the ci…	Q54 (Non-positive displacement fluid engines (i.e. driven by fluid); Miscellaneous motors and machines for producing mechanical power/thrust (F03B,D,G,H)); X11 (Power Generation and High Power Machines)	X11-B01; X11-J07	F03B-013/10; F03B-017/06; F03B-003/18	KR1081428-B1 08 Nov 2011 F03B-013/10 201202 Pages: 11	KR1081428-B1 KR050637 28 May 2010	KR050637 28 May 2010	DIIDW:2011Q06860
112	P	CN114922767-A; CN114922767-B	Sea flow energy generating device useful for inhibiting vortex-induced vibration of tension leg platform, has sleeve pipe rotatably set on tension leg platform for connecting pair of rotating mechanism and side wing generating mechanism, and first cutting piece glidingly inserted in cutting piece.	JIANG L	UNIV HOHAI (UYHO-C)	2022B0421X	NOVELTY - The device has sleeve pipe rotatably set on tension leg platform for connecting pair of rotating mechanism and side wing generating mechanism. A rotating mechanism symmetrically set on two sides of sleeve pipe for disturbing vortex formed sleeve pipe. The rotating mechanism comprises bidirectional adjusting piece slidingly provided with two rotating pieces. The moving direction of two r…	Q54 (Non-positive displacement fluid engines (i.e. driven by fluid); Miscellaneous motors and machines for producing mechanical power/thrust (F03B,D,G,H)); X15 (Non-Fossil Fuel Power Generating Systems)	Q54-X; X15-C01	F03B-011/00; F03B-011/02; F03B-013/00; F03B-013/18	CN114922767-A 19 Aug 2022 F03B-013/18 202273 Chinese	CN114922767-A CN10419075 21 Apr 2022	CN10419075 21 Apr 2022	DIIDW:2022B0421X
113	P	CN112400769-A	Fish farming device for automatically shifting position based on tide change, has second rotating shaft that is drivingly connected with driving motor, and driving motor that is electrically connected with trigger switch.	WU H	WU H (WUHH-Individual)	202123600S	NOVELTY - The device has a base (1). The base is connected with a transmission box (3) through multiple support rods (2), and the transmission box is connected with a first rotating shaft (4) and a worm (5). A trigger switch is provided between the first rotating shaft and the transmission box, and a transmission mechanism (8) matched with the worm is provided on the base. An upper end of the fir…	P14 (Animal management and care (A01K, L, M).); P43 (Sorting, cleaning, waste disposal (B06, B07, B08, B09).); X25 (Industrial Electric Equipment)	P14-A01A; P14-E01C; P14-E02A; P43-B99; P43-U05; X25-H; X25-N02	A01K-061/60; A01K-063/04; B08B-009/08; B08B-009/087	CN112400769-A 26 Feb 2021 A01K-061/60 202123 Pages: 8 Chinese	CN112400769-A CN11242893 09 Nov 2020	CN11242893 09 Nov 2020	DIIDW:202123600S
114	P	WO2017213489-A1; EP3469144-A1; EP3469144-B1	Elongate flexible container for use as core or base of dam, has overflow orifice which is normally closed and is opened when pressure of filler material in container exceeds predetermined value.	TER HARMSEL M	TENCATE GEOSYNTHETICS NETHERLANDS BV (TENC-Non-standard)	201785331M	NOVELTY - The container (1) has a filling orifice that fills the container with a filler material. The filler material comprises loose or little coherent solid material such as sand or other ground material or any other granular material. An overflow orifice (2) is normally closed and is opened when a pressure of the filler material in the container exceeds a predetermined value. A deformable out…	Q42 (Hydraulic engineering, soil shifting and sewerage (E02, 3))	Q42-A02B; Q42-A02C	E02B-003/04; E02B-003/12	WO2017213489-A1 14 Dec 2017 E02B-003/04 201801 Pages: 15 English	WO2017213489-A1 WONL050409 08 Jun 2016	EP744902 08 Jun 2016	DIIDW:201785331M
115	P	CN104728036-A	Tidal power generating device, has dam body whose two sides are uniformly fixed with power generation module, and barrier whose end is connected with dam body that is connected with motor through steel wire rope.	CHE G	CHENGDU FUYANG TECHNOLOGY DEV CO LTD (CHEN-Non-standard)	2015512430	NOVELTY - The device has a main body frame (1) connected with a middle part of a mounting fixing plate through a bolt. An electric machine fixing frame (3) is connected with an electric generator (2) that is fixed with a middle part of the main body frame. The main body frame is equipped with a separate grate bar hanger. Two sides of a dam body are uniformly fixed with a power generation module. …	Q54 (Non-positive displacement fluid engines (i.e. driven by fluid); Miscellaneous motors and machines for producing mechanical power/thrust (F03B,D,G,H)); X11 (Power Generation and High Power Machines); X15 (Non-Fossil Fuel Power Generating Systems)	X11-B; X15-C02	F03B-013/26	CN104728036-A 24 Jun 2015 F03B-013/26 201565 Pages: 6 Chinese	CN104728036-A CN10118112 17 Mar 2015	CN10118112 17 Mar 2015	DIIDW:2015512430
116	P	CN202148973-U	Variable-arm long vertical axis shaft tidal turbine generator set for use in e.g. river current energy utilization, has blade provided with fixing and telescopic arms, and big gear connected with small gear shaft.	GUO J	UNIV DALIAN TECHNOLOGY (UYDA-C)	2012C83157	NOVELTY - The generator set has a blade (1) provided with two fixing arms (5) and two telescopic arms (3). A section of the blade is in national advisory committee for aeronautics wing shape. An end of each telescopic arm is provided with a rectangular or round-shaped piston head. A main shaft bearing (12) is provided with a thrust bearing and a radial bearing. A hydraulic station (15) is filled …	Q54 (Non-positive displacement fluid engines (i.e. driven by fluid); Miscellaneous motors and machines for producing mechanical power/thrust (F03B,D,G,H))		F03B-013/00; F03B-003/00; F03B-003/14	CN202148973-U 22 Feb 2012 F03B-013/00 201219 Pages: 12 Chinese	CN202148973-U CN20193086 09 Jun 2011	CN20193086 09 Jun 2011	DIIDW:2012C83157
117	P	TW270962-A	Power system which generates electricity by harnessing natural resources - has water collection column in form of hollow cylinder with multiple rocking bars pivotally and annularly installed on outer edge of column.	GAU Y	GAU Y (GAUY-Individual)	1996229208	The power system comprises at least, a water-collection column, which is a hollow cylinder in which the cylinder body is implanted into the sea bed beneath the sea level for appropriate depth and the cylinder body is installed with multiple through holes at appropriate locations. Multiple rocking bars are provided in which one end of the rocking bars is pivotally and annularly installed on the ou…	Q55 (Positive displacement fluid machines/pumps/compressors (i.e. for driving fluid) (F04B,C)); X15 (Non-Fossil Fuel Power Generating Systems)	X15-X	F03B-013/12	TW270962-A 21 Feb 1996 F03B-013/12 199623 Pages: 14	TW270962-A TW107588 18 Aug 1994	TW107588 18 Aug 1994	DIIDW:1996229208
118	P	CN114626159-A	Method for designing bidirectional through-flow runner blade reverse problem based on new load distribution in ocean energy conversion technology field, involves dividing first boundary between area where rotating wheel blade is located and area of movable guide blade.	LUO X	UNIV XIAN TECHNOLOGY (UYXT-C)	2022834125	NOVELTY - The method involves dividing a first boundary between an area where a rotating wheel blade is located and an area of a movable guide blade. A second boundary is divided between the area where the rotating wheel blades are located and the area of the tail water pipe. The first boundary line and the second boundary line are turned along the rotating center of the rotating blade to form a …	Q54 (Non-positive displacement fluid engines (i.e. driven by fluid); Miscellaneous motors and machines for producing mechanical power/thrust (F03B,D,G,H)); X11 (Power Generation and High Power Machines); X15 (Non-Fossil Fuel Power Generating Systems)	Q54-X; Q54-A05; X11-B01; X15-C03; X15-C02	F03B-013/26; F03B-003/12; G06F-111/04; G06F-113/08; G06F-119/14; G06F-030/17; G06F-030/28	CN114626159-A 14 Jun 2022 G06F-030/17 202258 Chinese	CN114626159-A CN10292274 24 Mar 2022	CN10292274 24 Mar 2022	DIIDW:2022834125
119	P	CN113431731-A	Sea wave energy collecting system, has an one-way ocean current sea wave horizontal energy collecting systems that connected in parallel on high pressure water pipe network.	ZENG X	ZENG Z (ZENG-Individual)	2021B3845E	NOVELTY - The system has a high-pressure water output sea wave vertical energy collecting system connected with a mechanical rotation output sea-wave vertical energy collection system, an one-way sea wave horizontal energy acquisition system, an omni-directional sea wave horizontally energy collection systems and a high pressure water pipe network. The system is connected with the high pressure-w…	Q54 (Non-positive displacement fluid engines (i.e. driven by fluid); Miscellaneous motors and machines for producing mechanical power/thrust (F03B,D,G,H)); X15 (Non-Fossil Fuel Power Generating Systems)	Q54-X; Q54-A05; X15-C02; X15-C01A	F03B-013/00; F03B-013/14; F03B-013/18; F03B-013/22; F03B-003/12; F03B-003/14	CN113431731-A 24 Sep 2021 F03B-013/18 202182 Chinese	CN113431731-A CN10886106 03 Aug 2021	CN10886106 03 Aug 2021	DIIDW:2021B3845E
120	P	CN213684365-U	Double-stage series flow energy water turbine, has connecting shaft whose two ends are respectively connected with rear blade shaft and front blade shaft, and buffer wheel installed on back blade shaft, where buffer pad is installed on supporting plate.	LIANG Y	UNIV CHINA PETROLEUM EAST CHINA (UYPE-C)	202182807C	NOVELTY - The utility model relates to a double-stage series water turbine using ocean tidal energy to generate electricity, more specifically to a double-stage series flow energy water turbine, which can increase the stability of the water turbine when working, reducing the impeller lifting process in the problem of rigid impact with the supporting system and fully using the power flow energy, i…	Q54 (Non-positive displacement fluid engines (i.e. driven by fluid); Miscellaneous motors and machines for producing mechanical power/thrust (F03B,D,G,H)); X11 (Power Generation and High Power Machines); X15 (Non-Fossil Fuel Power Generating Systems)	Q54-A05; Q54-X; X11-B01; X11-J05; X15-C01; X15-C02	F03B-003/12; F03B-011/00; F03B-011/04; F03B-013/14; F03B-013/26	CN213684365-U 13 Jul 2021 F03B-003/12 202160 Pages: 9 Chinese	CN213684365-U CN22847939 01 Dec 2020	CN22847939 01 Dec 2020	DIIDW:202182807C
121	P	CN204476680-U	Fluid pump tidal power generating device, has main body provided with piston mechanism, piston machine and water inlet control valve, and displacement control valve and weight connected with each other.	ZHENG H	ZHENG H (ZHEN-Individual)	201554686W	NOVELTY - The new type utility claims have one kind used for fluid pump and tide generating device of tidal power generating device. Used for fluid pump and tide generating device, comprising control for tidal sea water entering into and pressurized water output of seawater inlet and outlet control valve, piston mechanism used for piston movement by tide water and for absorbing moisture and tidal…	Q54 (Non-positive displacement fluid engines (i.e. driven by fluid); Miscellaneous motors and machines for producing mechanical power/thrust (F03B,D,G,H)); Q55 (Positive displacement fluid machines/pumps/compressors (i.e. for driving fluid) (F04B,C)); X15 (Non-Fossil Fuel Power Generating Systems)	X15-C02	F03B-013/26; F04B-017/00; F04B-049/22; F04B-053/10; F04B-053/14	CN204476680-U 15 Jul 2015 F04B-017/00 201565 Pages: 13 Chinese	CN204476680-U CN20018823 12 Jan 2015	CN20018823 12 Jan 2015	DIIDW:201554686W
122	P	CN203412689-U	Hydraulic power generation water turbine has casing which is provided with water inlet extended to water inlet pipe fixed with upper end of cable conduit provided with water supply pipes which are arranged in parallel.	GU P	UNIV ZHEJIANG OCEAN (UYZO-C)	2014F38599	NOVELTY - A one tide energy turbine, comprising a shell, a water wheel in the shell, and the water inlet of the one side of the shell, and a water outlet on the other side of the shell, said shell is provided with one water inlet through the water inlet pipe extends to the shell, said water inlet pipe fixing with one cable conduit at one end of the upper shell, said branch comprises a first water…	Q54 (Non-positive displacement fluid engines (i.e. driven by fluid); Miscellaneous motors and machines for producing mechanical power/thrust (F03B,D,G,H)); X11 (Power Generation and High Power Machines)	X11-B01; X11-J07	F03B-011/02; F03B-003/00	CN203412689-U 29 Jan 2014 F03B-003/00 201422 Pages: 6 Chinese	CN203412689-U CN20481760 08 Aug 2013	CN20481760 08 Aug 2013	DIIDW:2014F38599
123	P	SU1312238-A	Tidal energy power generator - has hydraulic motor connected to generator via freewheel coupling and flywheel.	DENISENKO G I	DENISENKO G I (DENI-Individual)	1988005848	Tidal power generator consists of an onshore base with supports and jibs located above the water, wave receivers which are connected to the jibs by flexible elements and an emergency safety system. The generator additionally incorporates a hydraulic motor (8) which is connected to the power generator (7) via a free-wheeling coupling (9) and a flywheel (10). It also has a hydraulic accumulator (11…	Q55 (Positive displacement fluid machines/pumps/compressors (i.e. for driving fluid) (F04B,C)); X11 (Power Generation and High Power Machines)	X11-B09	F03B-013/16	SU1312238-A 23 May 1987 198801 Pages: 5	SU1312238-A SU3928237 11 Jul 1985	SU3928237 11 Jul 1985	DIIDW:1988005848
124	P	CN216246623-U	Tide level instrument protection device for marine surveying and mapping, has first rotating shaft that is rotatably connected with transmission box fixedly connected with tide level meter main portion.	LIN S	FUJIAN JINDI SURVEY & PLANNING CO LTD (FUJI-Non-standard)	202253779V	NOVELTY - The utility model model claims a tide level instrument protection device for marine surveying, comprising a tide level instrument main body and a protection mechanism the tide level meter main body is provided with a hemispherical probe, the protective mechanism comprises a scraper sliding against the probe, the scraper is connected with a self-driven mechanism mechanism, comprising a c…	P43 (Sorting, cleaning, waste disposal (B06, B07, B08, B09).); S02 (Engineering Instrumentation)	P43-B99; S02-C06	B08B-001/04; G01F-023/00	CN216246623-U 08 Apr 2022 G01F-023/00 202234 Chinese	CN216246623-U CN22453074 12 Oct 2021	CN22453074 12 Oct 2021	DIIDW:202253779V
125	P	CN213807916-U	Guide groove structure integrated flow guide cover type tide energy generating device, has guide cover main body whose bottom side is provided with supporting structure, and movable baffle plate fixed in guide groove through rotating bolt structure.	SONG K	UNIV KUNMING (UVKM-C)	202189211P	NOVELTY - The utility model claims a flow guide cover type power flow energy generating device with guide groove structure, belonging to the technical field of power flow energy generating device. The generating device comprises a generator, a supporting structure, an impeller, a guide cover main body, a guide groove; a movable baffle and a rotating bolt structure; the bottom side of the guide co…	Q54 (Non-positive displacement fluid engines (i.e. driven by fluid); Miscellaneous motors and machines for producing mechanical power/thrust (F03B,D,G,H))	Q54-A05; Q54-X	F03B-013/00; F03B-015/08; F03B-003/16; F03B-003/18	CN213807916-U 27 Jul 2021 F03B-003/16 202163 Pages: 10 Chinese	CN213807916-U CN22807572 30 Nov 2020	CN22807572 30 Nov 2020	DIIDW:202189211P
126	P	CN210049995-U	Seawater radial plunger pump structure, has shell whose two sides are sealed and provided with rotary end cover, and gas charging valve arranged in sealing cavity in vertical direction, where suction valve and delivery valve are symmetrically distributed.	HU B	HUAIAN VOCATIONAL COLLEGE INFORMATION TE (HUAA-C)	2020149834	NOVELTY - The utility model claims a new-type seawater radial plunger pump structure, comprising a rotary shell set symmetrically up and down, rotated by two sides of the shell are sealed and provided with a rotary end cover, between the rotating shell and the rotating end cover form a sealed cavity; distributed with twelve plunger body along the central position of the sealing cavity, the free e…	Q55 (Positive displacement fluid machines/pumps/compressors (i.e. for driving fluid) (F04B,C))	Q55-A	F04B-001/0404; F04B-001/0408; F04B-001/0421; F04B-001/047	CN210049995-U 11 Feb 2020 F04B-001/047 202016 Pages: 7 Chinese	CN210049995-U CN20418601 29 Mar 2019	CN20418601 29 Mar 2019	DIIDW:2020149834
127	P	CN203441674-U	Marine tidal power generation device, has main body linked with reservoir and generating set, where seawater is conveyed to water supply device of reservoir, and water supply device provided with upright post, lower jar body and water pipe.	MA J	MA Z (MAZZ-Individual)	2014G63633	NOVELTY - This new type utility claims one of ocean tidal power generation device, comprising a reservoir and generating set, the water level of the reservoir is higher than the sea level, the reservoir with the tide and falling the seawater to the water supply device of reservoir, said water supply device comprises an upright post, a lower jar body, a floating body assembly and a water pipe, a l…	Q54 (Non-positive displacement fluid engines (i.e. driven by fluid); Miscellaneous motors and machines for producing mechanical power/thrust (F03B,D,G,H)); X11 (Power Generation and High Power Machines); X15 (Non-Fossil Fuel Power Generating Systems)	X11-B; X11-U05; X15-C02	F03B-013/26	CN203441674-U 19 Feb 2014 F03B-013/26 201426 Pages: 5 Chinese	CN203441674-U CN20488018 03 Aug 2013	CN20488018 03 Aug 2013	DIIDW:2014G63633
128	P	WO2010109074-A1; US2010242826-A1; CA2759167-A1; EP2411663-A1; NZ595911-A; CA2759167-C; EP2411663-A4; EP2411663-B1	Method for installing and servicing apparatus for recovering kinetic energy of seawater, involves descending apparatus module onto sea bottom by allowing water into compartments.	KOIVUSAARI R	AW-ENERGY OY (AWEN-Non-standard)	2010M57504	NOVELTY - The method involves creating an apparatus module (1) consisting of a floating portion (2) equipped with compartments. The apparatus module is descended onto the sea bottom by allowing the water run into the compartments which are filled by air and water so that the floating portion draws the recovery units (3) into the production site at the same time.	Q42 (Hydraulic engineering, soil shifting and sewerage (E02, 3)); Q54 (Non-positive displacement fluid engines (i.e. driven by fluid); Miscellaneous motors and machines for producing mechanical power/thrust (F03B,D,G,H)); X15 (Non-Fossil Fuel Power Generating Systems)	X15-C01; X15-C02	E02B-009/08; F03B-013/14; F03B-013/18; B63G-008/22; F02B-009/08	WO2010109074-A1 30 Sep 2010 F03B-013/18 201066 Pages: 27 English	WO2010109074-A1 WOFI050232 24 Mar 2010	US411785 26 Mar 2009	DIIDW:2010M57504
129	P	CN114658587-A; WO2023179064-A1; CN114658587-B	Ocean water energy generating device for generating electric energy from ocean water, has power generating mechanism for driving generating mechanism to generate electricity when first and second winding shaft groups are wound in elastic line in relaxed state.	WANG X	WANG X (WANG-Individual)	2022868983	NOVELTY - The device has a power-generating mechanism (400) for converting mechanical energy into electric energy. An energy collecting mechanism (100) is provided with a floating component (101) and a conversion mechanism (102). The floating component is connected with seawater (500). The conversion mechanism and the floating component are connected with each other for converting fluctuation of …	Q54 (Non-positive displacement fluid engines (i.e. driven by fluid); Miscellaneous motors and machines for producing mechanical power/thrust (F03B,D,G,H)); X11 (Power Generation and High Power Machines); X15 (Non-Fossil Fuel Power Generating Systems)	Q54-X; Q54-E; X11-J05; X11-B05; X15-C02; X15-C01	F03B-013/12; F03G-001/02	CN114658587-A 24 Jun 2022 F03B-013/12 202260 Chinese	CN114658587-A CN10280075 21 Mar 2022	CN10280075 21 Mar 2022	DIIDW:2022868983
130	P	CN113482841-A	High pressure water output type sea wave vertical energy collector, has piston rod whose end is connected with power duckweed, where pressure water cylinder body below one-way valve is provided with suction pipe.	ZENG X	ZENG Z (ZENG-Individual)	2021B8997L	NOVELTY - The collector comprises a power duckweed (1) whose end is connected with a piston rod (3). The other end of the piston rod is glidingly inserted in a pressure cylinder body (2). The top portion of the pressure cylinder is provided with a first one-way valve (4). The pressure water cylinder body is provided below the first one way valve. The pressure pipe (5) is provided under a first wa…	A88 (Mechanical engineering and tools e.g. valves, gears and conveyor belts.); Q54 (Non-positive displacement fluid engines (i.e. driven by fluid); Miscellaneous motors and machines for producing mechanical power/thrust (F03B,D,G,H)); X15 (Non-Fossil Fuel Power Generating Systems)	A12-H07; A12-H02; Q54-X; X15-C02; X15-C01	F03B-011/00; F03B-011/02; F03B-013/20	CN113482841-A 08 Oct 2021 F03B-013/20 202187 Chinese	CN113482841-A CN10887530 03 Aug 2021	CN10887530 03 Aug 2021	DIIDW:2021B8997L
131	P	CN111530738-A; CN111530738-B	Deep sea tidal current energy type ore sorting device, has three triangular wings uniformly distributed on peripheral surface of outer body of pile column, and reinforcing structure arranged at bottom of inverted round table of pile column.	LV J	JIANGSU NEW YANGZI SHIPBUILDING CO LTD (JIAN-Non-standard)	202080781M	NOVELTY - The device has a convex first mounting ring arranged above a top of a bottom screen. A threaded hole is formed in the first mounting ring. A convex mounting head is arranged at a bottom of an upper screen. The mounting head is mounted in the first mounting ring of the bottom screen through a thread. A convex second mounting ring is arranged above a top of the upper screen. A threaded ho…	J01 (Separation - including evaporation, crystallisation, solvent extraction, chromatography, dialysis, osmosis including drying gases and/or vapours, and separation of solids from gases, liquids and other solids. Isotope separation, filter materials (including molecular sieves for separation), and centrifuges (except where used for analysis) (B01D, B03, B04, B07B).); P41 (Crushing: centrifuging,…	J01-K04; P41-K; P41-T07; P41-V22; Q54-X; X15-C02	B07B-001/08; B07B-001/42; B07B-001/46; F03B-013/26	CN111530738-A 14 Aug 2020 B07B-001/42 202069 Pages: 13 Chinese	CN111530738-A CN10552145 17 Jun 2020	CN10552145 17 Jun 2020	DIIDW:202080781M
132	P	CN114562983-A; CN216977898-U	Tide driving type offshore marine element vertical section measuring system, has battery fixed on inner side of cabin body and connected with control unit, and measuring unit fixed on outer side of body to measure vertical section of sea water.	CHEN Y	UNIV ZHEJIANG HAINAN RES INST (UYZH-C)	202277255V	NOVELTY - The system has a cable whose first end is fixedly connected with a cabin body. A second end of the cable is used for anchoring a seabed. A sailboard is fixed on an outer side of the cabin body. A pressure sensor is fixed on an outer side of a cabin body for measuring seawater pressure. A control unit is electrically connected with the pressure sensor. A linear drive mechanism receives s…	S01 (Electrical Instruments); S02 (Engineering Instrumentation); W06 (Aviation, Marine and Radar Systems)	S01-H09; S02-B04; W06-C07C	B63B-022/00; B63B-022/18; F03B-013/00; G01C-013/00	CN114562983-A 31 May 2022 G01C-013/00 202268 Chinese	CN114562983-A CN10335524 31 Mar 2022	CN10335524 31 Mar 2022	DIIDW:202277255V
133	P	GB2481852-A; WO2012004608-A2; WO2012004608-A3; CA2804894-A1; EP2591528-A2; GB2481852-B; EP2591528-B1; ES2552950-T3	Cable connection apparatus for terminating/connecting underwater cables that provide connections between electrical generator and distribution network of e.g. off-shore wind device, has housings arranged to enclose cable core.	ABRETTI E L	J&S LTD (JSJS-Non-standard)	2012A54086	NOVELTY - The apparatus has outer frame plates (4) including an aperture arranged to receive a multicore cable (10). Two bulkhead plates (6) are arranged between the outer frame plates. Each bulkhead plate includes a set of apertures. Each aperture is arranged to receive an individual core (22) of the multicore cable. A set of watertight cable housings (28) extends between corresponding apertures…	X12 (Power Distribution/Components/Converters)	X12-G01A7G; X12-G01E	H02G-015/013; H02G-015/076; H02G-015/117; H02G-009/02; H02G-015/14	GB2481852-A 11 Jan 2012 H02G-015/013 201206 Pages: 21 English	GB2481852-A GB011593 09 Jul 2010	GB011593 09 Jul 2010	DIIDW:2012A54086
134	P	CN115419537-A	Water guide plate device for ocean energy generator, has impact plate pressed to overcome elastic force of elastic unit to drive movable block to slide along linear guide unit in box body when water flow is acute.	ZHANG B	YANCHENG TECHNOLOGY TECHNOLOGY TRANSFER (YANH-C)	2022F3012S	NOVELTY - The device has a mounting plate (4) fixed on a front side of a water guide plate (2) and fixed on an inner wall of a shell (1). A box body is rotatably connected with the mounting plate through a rotating shaft. A linear guide unit is fixed in the box body along water flow direction. The linear guide units are slidingly provided with movable blocks. An elastic unit is arranged between t…	Q54 (Non-positive displacement fluid engines (i.e. driven by fluid); Miscellaneous motors and machines for producing mechanical power/thrust (F03B,D,G,H)); X15 (Non-Fossil Fuel Power Generating Systems); X11 (Power Generation and High Power Machines)	Q54-A05; Q54-X; X15-C02; X11-B01; X11-B10; X11-U01B	F03B-013/00; F03B-015/12; F03B-003/18	CN115419537-A 02 Dec 2022 F03B-003/18 202202 Chinese	CN115419537-A CN11065562 31 Aug 2022	CN11065562 31 Aug 2022	DIIDW:2022F3012S
135	P	WO2016190738-A1; NL2014856-C; EP3303230-A1; EP3303230-B1; EP3303230-B8; ES2830449-T3	Elongate flexible container for solid liquid separation and/or dewatering and/or consolidation has at least two elongate container parts joined to each other over circumferential seam and filling opening arranged between two container parts.	TER HARMSEL M	TENCATE GEOSYNTHETICS NETHERLANDS BV (TENC-Non-standard)	201673864P	NOVELTY - The container (1) has at least one filling opening (3) for filling the container with a material such as material to be separated and/or dewatered and/or consolidated. The at least two elongate container parts are joined to each other over a circumferential seam (5). The filling opening is arranged between two container parts by locally not (directly) joining the two container parts to …	D15 (Chemical or biological treatment of water, industrial waste and sewage - including purification, sterilising or testing water, scale prevention, treatment of sewage sludge, regeneration of active carbon which has been used for water treatment and impregnating water with gas e.g. CO2, but excluding plant and anti-pollution devices (C02).); Q32 (Container/closure types, special packaging featu…	D04-A01; D04-D; Q32-A99; Q32-B03; Q34-B; Q76-B02	B65D-088/16; C02F-011/12; F26B-005/14	WO2016190738-A1 01 Dec 2016 C02F-011/12 201683 Pages: 24 English	WO2016190738-A1 WONL050374 26 May 2016	NL2014856 26 May 2015	DIIDW:201673864P
136	P	WO9527851-A1; AU9521451-A; GB2302710-A; GB2302710-B	Wave and-or tidal energy extractor uses modular units each with three cylindrical floats with restraining cables incorporating safety sheet bolt.	O'MEARA M	O'MEARA M (OMEA-Individual)	1995366430	The extractor (10) comprises a plurality of independent modular units (11) with inlet and outlet pipes connected to common supply and delivery pipes. Each modular unit and three main floats (12) in the form of cylindrical chambers which float on the water. The axes of the floats are parallel and are coaxial with the floats of their modules. Each flat is attached to one end of two main cables (14)…	Q55 (Positive displacement fluid machines/pumps/compressors (i.e. for driving fluid) (F04B,C)); X11 (Power Generation and High Power Machines); X15 (Non-Fossil Fuel Power Generating Systems)	X11-B09; X15-C01	F03B-013/18	WO9527851-A1 19 Oct 1995 F03B-013/18 199547 Pages: 33 English	WO9527851-A1 WOGB00806 07 Apr 1995	GB007016 08 Apr 1994	DIIDW:1995366430
137	P	WO2020058332-A1; CA3113121-A1; IN202147017654-A; AU2019341540-A1; CN112770970-A; TW202037534-A; KR2021061401-A; TW202025854-A; TW202023898-A; BR112021005043-A2; SG11202102702-A1; EP3853121-A1; VN78574-A; US2021346922-A1; JP2022500977-W; EP3853121-B1; ES2920703-T3; RU2021110896-A; RU2791929-C2; US11841133-B2; TW821402-B1; JP7422136-B2; TW831833-B1; IN505893-B	Antifouling system reducing and/or preventing fouling of object exposed to fouling conditions when in use has antifouling devices to be driven using transmitted power from inductive power receivers when antifouling system is in use.	LEIJSSEN J J	KONINK PHILIPS NV (PHIG-C)	2020238680	NOVELTY - The antifouling system has antifouling devices (26) for providing an antifouling radiation to at least portion of the object and/or at least portion of the antifouling system. The antifouling system further includes a power transmission system having an inductive power emitter (10) comprising at least one inductive emitter element (12), and inductive power receivers (24) each one compri…	P43 (Sorting, cleaning, waste disposal (B06, B07, B08, B09).); W06 (Aviation, Marine and Radar Systems); X15 (Non-Fossil Fuel Power Generating Systems)	P43-B08; P43-U03; P43-U05; W06-C01B7; W06-C01C; W06-C07A; X15-B01A; X15-B03; X15-B06	B08B-017/02; B63B-059/04; F21V-023/02; F21V-031/00; F21W-107/20; F21Y-105/16; F21Y-115/10; H02J-050/10; H01F-038/14; H02J-050/12; H02J-050/40; H02J-050/80; H02J-007/02; H02G-001/10; H05B-033/10; A61L-002/10; F21V-023/00; A61L-002/08; A61L-002/26; B63B-059/08; C09D-005/06; C09D-005/16; F21V-023/04; H02J-050/90; H05B-045/50	WO2020058332-A1 26 Mar 2020 B63B-059/04 202030 Pages: 47 English	WO2020058332-A1 WOEP075000 18 Sep 2019	EP195677 20 Sep 2018	DIIDW:2020238680
138	P	CN110469451-A; CN110469451-B	Tidal current energy conversion device for comprehensive utilization of linear rotary power generation, has linear generator that is connected to tension film which is provided inside tail-stage power generation section.	KANG J	UNIV HARBIN ENGINEERING (UHEG-C)	201998982R	NOVELTY - The energy conversion device has a first-stage power generation section (1) and a tail-stage power generation section (2). The first-stage power generation section is provided with a water inlet shell (11) and located on the front right side of the water inlet shell. A hydro-generator (12) is installed on the rear and left side of the water inlet shell respectively. A water inlet is ope…	Q54 (Non-positive displacement fluid engines (i.e. driven by fluid); Miscellaneous motors and machines for producing mechanical power/thrust (F03B,D,G,H)); X11 (Power Generation and High Power Machines); X15 (Non-Fossil Fuel Power Generating Systems)	Q54-X; X11-B; X11-J01; X15-C02	F03B-013/26; H02K-001/34; H02K-035/02	CN110469451-A 19 Nov 2019 F03B-013/26 201996 Pages: 11 Chinese	CN110469451-A CN10806770 29 Aug 2019	CN10806770 29 Aug 2019	DIIDW:201998982R
139	P	CN114753962-A	Device for generating electricity by using tidal power comprises impeller shaft horizontally installed on support, two sides of each impeller on support respectively provided with guide plate respectively, and lower part of support provided with buoyancy device.	HU J	LV L (LVLL-Individual)	2022949866	NOVELTY - Device for generating electricity by using tidal power comprises impeller drives the generator through the impeller and support (15) for setting the impeller, generator (3) and auxiliary equipment. The power generating device is fixed on the seabed anchoring point and anchor chain (2) for fixing the support on the anchoring point (1). The support is a structure similar to a funnel-shape…	Q54 (Non-positive displacement fluid engines (i.e. driven by fluid); Miscellaneous motors and machines for producing mechanical power/thrust (F03B,D,G,H)); X15 (Non-Fossil Fuel Power Generating Systems)	Q54-X; X15-C02	F03B-011/00; F03B-013/26	CN114753962-A 15 Jul 2022 F03B-013/26 202264 Chinese	CN114753962-A CN10367068 08 Apr 2022	CN10367068 08 Apr 2022	DIIDW:2022949866
140	P	CN111828240-A	Tidal power generation and energy supply equipment has water spray pipe that is fixedly connected to lower end of water outlet housing, and has pressure valve that is fixedly connected to one end of water spray channel close to each other.	GAO S	YIWU CHUCHEN NEW ENERGY TECHNOLOGY CO (YIWU-Non-standard)	2020A7526S	NOVELTY - The equipment has energy supply housing (11) whose upper end is fixedly connected with an upper water storage housing (29). A water-receiving plate (31) is slidably connected in the upper water storage cavity (34). An upper rack (35) is fixedly connected to the lower end of the water-bearing plate. A gear cavity (36) is provided on the upper side of the energy supply housing. A ratchet …	Q54 (Non-positive displacement fluid engines (i.e. driven by fluid); Miscellaneous motors and machines for producing mechanical power/thrust (F03B,D,G,H)); X11 (Power Generation and High Power Machines); X15 (Non-Fossil Fuel Power Generating Systems)	Q54-X; X11-B01; X11-J07; X15-C02	F03B-011/00; F03B-013/00; F03B-013/26	CN111828240-A 27 Oct 2020 F03B-013/26 202091 Pages: 11 Chinese	CN111828240-A CN10746961 29 Jul 2020	CN10746961 29 Jul 2020	DIIDW:2020A7526S
141	P	US2019323477-A1	Method for generating electricity from ebb and flow of water due to tidal action, involves providing displacement vessel, and generating electricity with activated electrical power generator by directional converter using mechanical energy.	BLODGETT L	BIG MOON POWER INC (BIGM-Non-standard)	201988119T	NOVELTY - The method involves providing a displacement vessel (102) at distance from a stationary location (106), where the displacement vessel is operatively coupled to a set of directional converters (109) at the stationary location. The set of directional converters is coupled to a set of electrical power generators (116), where the directional converter changes the distance between the displa…	W06 (Aviation, Marine and Radar Systems); X11 (Power Generation and High Power Machines); X15 (Non-Fossil Fuel Power Generating Systems)	W06-C01C; W06-C15G; X11-B; X11-J05B; X15-C02	B63B-035/44; F03B-013/26; H02K-007/18	US2019323477-A1 24 Oct 2019 F03B-013/26 201985 Pages: 75 English	US2019323477-A1 US453440 26 Jun 2019	US155538P 01 May 2015	DIIDW:201988119T
142	P	WO2018134567-A1; GB2560417-A; EP3571116-A1; US2019359291-A1; GB2560417-B	Connector i.e. underwater, offshore or subsea connector, for connecting e.g. chain, to e.g. turret buoy, has first arrangement connecting line to structure and comprising first and second parts, and second arrangement tensioning line.	SMITH D	FLINTSTONE TECHNOLOGY LTD (FLIN-Non-standard)	201858284S	NOVELTY - The connector (100) has a first arrangement (15) releasably connecting a line i.e. mooring line, to a structure (145). A second arrangement (20) tensions the line. The first arrangement comprises a first part (105) and a second part (110). A connecting element connects the first part and the second part, where the first arrangement comprises a recess, bore, through-passage or through bo…	Q24 (Ships; waterborne vessels; related equipment (B63)); W06 (Aviation, Marine and Radar Systems)	Q24-C05; Q24-P08; Q24-P18; W06-C01	B63B-021/00; B63B-021/10; B63B-021/50; B63B-021/20; F16G-011/00	WO2018134567-A1 26 Jul 2018 B63B-021/00 201854 Pages: 44 English	WO2018134567-A1 WOGB050083 12 Jan 2018	GB000813 17 Jan 2017	DIIDW:201858284S
143	P	FR3011135-A1; GB2519943-A	Underwater main actuation device for actuating connection between underwater cables and e.g. tidal turbine, has articulated sections articulated to align establishment part and reference part in order to ensure connection of parts.	PARKINSON R J	MOJO MARITIME LTD (MOJO-Non-standard)	2015212152	NOVELTY - The device (9) includes a connection establishment part (10) connected to a reference part (12) and provided with articulated sections (14, 16) that form of flexible joints. The articulated sections are articulated to align the establishment part and the reference part in order to ensure connection of the establishment part and the reference part. The establishment part is provided with…	V04 (Printed Circuits and Connectors)	V04-D03	H01R-013/533; H01R-013/631; H01R-013/639; H01R-043/26; F03B-013/26	FR3011135-A1 27 Mar 2015 H01R-013/631 201524 Pages: 26 French	FR3011135-A1 FR059027 24 Sep 2014	GB017037 25 Sep 2013	DIIDW:2015212152
144	P	SE9703455-A; SE517287-C2	Anchoring wave power machine used to convert tidal energy into electricity - buoy anchored below surface contains rotation axle for wave power machine, housing electric cable leading from machine to junction box and then to shore.	LAGSTROEM G E	LAGSTROEM G E (LAGS-Individual)	1999311419	NOVELTY - A buoy (6) anchored at a sufficient depth to prevent it from rotating is provided with a rotation axle (9a), about which the wave power machine can rotate and rise up and down with the aid of its ballast tanks. The top part of the rotation axle has a relatively large diameter and the axle is also provided with a protective tube (9b). An electric cable (10) extends from the wave power ma…	Q24 (Ships; waterborne vessels; related equipment (B63)); Q55 (Positive displacement fluid machines/pumps/compressors (i.e. for driving fluid) (F04B,C)); X15 (Non-Fossil Fuel Power Generating Systems)	X15-C01	F03B-013/12; B63B-022/02	SE9703455-A 25 Mar 1999 F03B-013/12 199926 Pages: 7 Swedish	SE9703455-A SE003455 24 Sep 1997	SE003455 24 Sep 1997	DIIDW:1999311419
145	P	CN116378877-A	Hydraulic power generation device with combination of lift and drag force, has primary and secondary resistance runner that are provided for generating torque to rotate runner shaft through resistance, and disc generator whose rotor is rotated by converting hydrodynamic energy into mechanical energy.	TENG S	UNIV JIANGSU (UYJS-C)	202373321G	NOVELTY - The device has a rotating wheel shaft (3) that is rotatably supported on a supporting frame (7). A first resistance rotating wheel (4) and a secondary resistance rotating wheel (6) are connected in series on the rotating wheel shaft. The lifting wheel is located at the periphery of the first-stage resistance rotating wheel and the secondary resistance rotating wheel and is connected to …	Q54 (Non-positive displacement fluid engines (i.e. driven by fluid); Miscellaneous motors and machines for producing mechanical power/thrust (F03B,D,G,H)); V06 (Electromechanical Transducers and Small Machines); X15 (Non-Fossil Fuel Power Generating Systems); X11 (Power Generation and High Power Machines)	Q54-A05; Q54-X; V06-M10; X15-C01; X15-C02; X11-B01; X11-B05; X11-J05B	F03B-013/00; F03B-013/22; F03B-013/26; F03B-003/12; H02K-007/18	CN116378877-A 04 Jul 2023 F03B-003/12 202361 Chinese	CN116378877-A CN10507970 08 May 2023	CN10507970 08 May 2023	DIIDW:202373321G
146	P	CN114810464-A	Wave and tide cooperative power generating device for converting tidal potential energy formed by ocean wave kinetic energy and sea plane natural fluctuation into electric energy, has energy storage system that is composed of cylindrical hydraulic energy storage cylinder.	LIU J	LIU J (LIUJ-Individual)	2022A2144J	NOVELTY - The device has an energy storage system that is composed of a cylindrical hydraulic energy storage cylinder (9), and a cylindrical gravity piston (29) matched with the cylindrical hydraulic energy storage cylinder, and a cylindrical water supply pool (10) is located below the cylindrical hydraulic energy storage cylinder. A power generation system is composed of a hydraulic solenoid val…	Q54 (Non-positive displacement fluid engines (i.e. driven by fluid); Miscellaneous motors and machines for producing mechanical power/thrust (F03B,D,G,H)); X11 (Power Generation and High Power Machines); X15 (Non-Fossil Fuel Power Generating Systems)	Q54-X; X11-B; X15-C02; X15-C01	F03B-013/14; F03B-013/26	CN114810464-A 29 Jul 2022 F03B-013/14 202268 Chinese	CN114810464-A CN10249012 10 Mar 2022	CN10249012 10 Mar 2022	DIIDW:2022A2144J
147	P	CN112761856-A; CN112761856-B	Unit protection device that improves efficiency of tidal power generation to disperse fish, has ultrasonic transducer installed above waterproof housing, side baffle is connected to middle position of side surface of front and rear cover.	HAN T	HAN T (HANT-Individual)	202154139D	NOVELTY - The device has a rotating plates that are installed on the surfaces of a fan blades (8). A limit slot is provided on the surface of the rotating plate. A counterweight metal ball is arranged inside the limit slot. A micro generator assembly is fixedly installed on the back of the fan blade. The inner sides of a front cover (1) and a rear cover (4) are fixedly installed with a waterproof…	Q54 (Non-positive displacement fluid engines (i.e. driven by fluid); Miscellaneous motors and machines for producing mechanical power/thrust (F03B,D,G,H)); X11 (Power Generation and High Power Machines); X15 (Non-Fossil Fuel Power Generating Systems)	Q54-A05; Q54-X; X11-B01; X15-C02	F03B-011/00; F03B-011/02; F03B-013/00; F03B-013/26; F03B-003/12	CN112761856-A 07 May 2021 F03B-013/26 202145 Pages: 14 Chinese	CN112761856-A CN10102805 26 Jan 2021	CN10102805 26 Jan 2021	DIIDW:202154139D
148	P	WO2015082754-A1; EP3084208-A1; US2016369766-A1; EP3084208-A4	Wave energy conversion apparatus used in connection with panel, has actuating mechanism that converts power of circumferential speed of reciprocating panel at distance point to rotational movement of rotor of power-take-off machinery.	JAERVINEN A	AW-ENERGY OY (AWEN-Non-standard)	201533756P	NOVELTY - The apparatus has an actuating mechanism (8) that is configured to convert the power of the circumferential speed of a reciprocating panel (2) at a distance point being situated at the area of the upper half of the panel mechanically to a rotational movement of the rotor of the generator of a power-take-off machinery (11). The distance point is situated at the area of the upper fourth a…	Q54 (Non-positive displacement fluid engines (i.e. driven by fluid); Miscellaneous motors and machines for producing mechanical power/thrust (F03B,D,G,H)); X15 (Non-Fossil Fuel Power Generating Systems)	X15-C01; X15-C02	F03B-013/18; F03B-013/10; F03B-013/26; H02K-007/06; H02K-007/18	WO2015082754-A1 11 Jun 2015 F03B-013/18 201540 Pages: 25 English	WO2015082754-A1 WOFI051146 05 Dec 2013	EP898840 05 Dec 2013	DIIDW:201533756P
149	P	CN113431726-A; CN215333212-U	One-way ocean current sea wave horizontal energy collector for collecting e.g. sea wave energy, has transmission shaft of ocean current driving wheel rotatably connected with bracket, where driving wheel is located in duct of bracket.	ZENG X	ZENG Z (ZENG-Individual)	2021B4021N	NOVELTY - The collector has a single-way ocean current driving wheel connected with a transmission shaft (3). The transmission shaft is arranged in a horizontal manner. The one-way sea wave driving wheel is provided with a wheel frame (11). The wheel frame is circumferentially distributed with two power rotating blades (12) around the transmission shaft. The power rotating blade is rotatably conn…	Q54 (Non-positive displacement fluid engines (i.e. driven by fluid); Miscellaneous motors and machines for producing mechanical power/thrust (F03B,D,G,H)); Q55 (Positive displacement fluid machines/pumps/compressors (i.e. for driving fluid) (F04B,C)); X15 (Non-Fossil Fuel Power Generating Systems)	Q54-X; Q54-A05; Q55-D; X15-C02; X15-C01	F03B-013/14; F04B-043/06; F03B-013/22; F03B-003/12; F03B-003/14	CN113431726-A 24 Sep 2021 F03B-003/14 202183 Chinese	CN113431726-A CN10887514 03 Aug 2021	CN10887514 03 Aug 2021	DIIDW:2021B4021N
150	P	CN111502903-A; CN111502903-B	Sea water turbine tide power generation system, has transmission wheel rotatably connected to top portion of guide frame, and water wheel rotatably connected to top end of floating and sinking device.	XU T	XU T (XUTT-Individual)	202077145Q	NOVELTY - The system has a dam body (1) formed with multiple water inlet and outlet combinations (101). Each water inlet and outlet combination is provided with a movable gate (2). The dam body is provided with a guide frame (3) that is provided with a fixing column (4). A top portion of the guide frame is formed with a through-hole. A bottom end of the fixing column is fixed on ground. An upper …	Q54 (Non-positive displacement fluid engines (i.e. driven by fluid); Miscellaneous motors and machines for producing mechanical power/thrust (F03B,D,G,H)); X11 (Power Generation and High Power Machines); X15 (Non-Fossil Fuel Power Generating Systems)	Q54-X; X11-B01; X11-B10; X11-J05; X15-C02	F03B-011/00; F03B-013/26; F03B-015/02	CN111502903-A 07 Aug 2020 F03B-013/26 202067 Pages: 9 Chinese	CN111502903-A CN10353620 29 Apr 2020	CN10353620 29 Apr 2020	DIIDW:202077145Q
151	P	CN213574896-U	Tidal current adjustable paddle hydraulic control system, has control unit provided with main control valve group and planetary speed reducer, hydraulic control execution unit installed in propeller hub part of water lower part, and motor connected with unit.	CAO S	NANJING HIGH ACCURATE MARINE EQUIP CO LT (NANJ-Non-standard)	202178245N	NOVELTY - The utility model belongs to the technical field of hydraulic control system, specifically relates to a flow energy adjustable paddle hydraulic control system, comprising a hydraulic station and a hydraulic control execution unit and a pipeline valve member; the hydraulic station comprises a motor pump group; the motor pump group is installed on the top of the oil tank; the side surface…	Q54 (Non-positive displacement fluid engines (i.e. driven by fluid); Miscellaneous motors and machines for producing mechanical power/thrust (F03B,D,G,H)); Q57 (Fluid-pressure actuators; hydraulic/pneumatics in general (F15)); X11 (Power Generation and High Power Machines)	Q54-A05; Q57-B; X11-B01; X11-B10	F15B-011/16; F03B-003/14	CN213574896-U 29 Jun 2021 F15B-011/16 202156 Pages: 8 Chinese	CN213574896-U CN21875187 01 Sep 2020	CN21875187 01 Sep 2020	DIIDW:202178245N
152	P	CN112012874-A; CN112012874-B	Ocean energy-collecting type self-variable-distance turbine wave energy generating device, has box formed with inner cavity, and connecting column whose side wall is connected with fan blade, where end of box is connected with barrel.	CHEN J	UNIV NORTHEAST NORMAL (UYNO-C)	2020C2001V	NOVELTY - The device has a fixing box (1) formed with an inner cavity. An end of the fixing box is fixedly connected with a connecting barrel (2). An end of the connecting barrel is fixedly connected with an outer barrel (3) far away from the fixing box. An inner wall of the outer barrel is fixedly connected with a baffle plate (5). The baffle plate divides the inner cavity of the fixing box into…	Q54 (Non-positive displacement fluid engines (i.e. driven by fluid); Miscellaneous motors and machines for producing mechanical power/thrust (F03B,D,G,H)); Q63 (Couplings; clutches; brakes; springs; dampers (F16D,F)); X15 (Non-Fossil Fuel Power Generating Systems)	Q54-A05; Q54-X; Q63-E01G; Q63-E02D; X15-C01; X15-C02	F03B-013/22; F03B-013/26; F03B-003/12; F16F-015/08	CN112012874-A 01 Dec 2020 F03B-013/22 202004 Pages: 9 Chinese	CN112012874-A CN10941576 09 Sep 2020	CN10941576 09 Sep 2020	DIIDW:2020C2001V
153	P	CN217270591-U	tide energy generating device of arc blade type water turbine, has main rod that is transversely penetrated and installed in first vertical frame and second vertical frame, and auxiliary rod is penetrated in third vertical frame.	YAN J	UNIV HOHAI (UYHO-C)	2022B0883T	NOVELTY - The utility model claims an arc blade type water turbine power flow energy generating device, relating to power flow energy power generation technology field, so as to solve the problem that the original power flow energy generating device structure is not firm enough, but also cannot circulate the large impurity operation, which not only reduces the rotating efficiency of the power flo…	Q54 (Non-positive displacement fluid engines (i.e. driven by fluid); Miscellaneous motors and machines for producing mechanical power/thrust (F03B,D,G,H)); X11 (Power Generation and High Power Machines); X15 (Non-Fossil Fuel Power Generating Systems)	Q54-X; X11-B01; X15-C02B	F03B-013/26	CN217270591-U 23 Aug 2022 F03B-013/26 202271 Chinese	CN217270591-U CN20482388 08 Mar 2022	CN20482388 08 Mar 2022	DIIDW:2022B0883T
154	P	CN204705350-U	Wave and tide energy recycling and self-testing system, has support base connected with inner side of floating body that is provided with floating ball, and recycling rope cabin equipped with support and floating body group.	HUANG L	HANGZHOU OCEAN ENG SURVEY DESIGN & RES (GJHY-C)	201572845T	NOVELTY - This utility model relates to a recovery wave, wherein the tide self-testing system, inside of base holder comprising, pedestal bracket provided with floating combination, combination floating frame provided with floating ball, a wave measuring instrument, battery cylinder and releaser, releaser and match the release mechanism and rope cabin connected with recycling, recycling rope cabi…	S02 (Engineering Instrumentation)	S02-B04	G01C-013/00	CN204705350-U 14 Oct 2015 G01C-013/00 201582 Pages: 5 Chinese	CN204705350-U CN20244526 21 Apr 2015	CN20244526 21 Apr 2015	DIIDW:201572845T
155	P	KR1549445-B1	Energy harvester for use as power generator for e.g. bicycle, has electrified body arranged with elastic part for shock-absorbing to reduce impact delivered from electrified bodies, where bodies are isolated with each other.	CHOI D H	UNIV CHUNG ANG IND ACAD COOP FOUND (UYCU-C)	201555091N	NOVELTY - The harvester (1) has a tribo device charged with driving of a presser cam (300). The presser cam performs axis rotation (310) or oscillation movement. The presser cam is separately arranged from an electrified body (110). Another electrified body (120) is arranged with an elastic part for shock-absorbing to reduce impact delivered from the electrified bodies. The electrified bodies are…	X22 (Automotive Electrics)	X22-F01A; X22-F02; X22-P01	H02N-001/04	KR1549445-B1 04 Sep 2015 H02N-001/04 201567 Pages: 26	KR1549445-B1 KR090887 18 Jul 2014	KR090887 18 Jul 2014	DIIDW:201555091N
156	P	GB2505704-A	Seal for piston in cylinder arrangement e.g. hydraulic system, has reservoir that is provided with pressure adjusting unit that is arranged to vary pressure within reservoir in response to changing pressure of working fluid in chamber.	CROWLEY M D	AQUAMARINE POWER LTD (AQUA-Non-standard)	2014E43346	NOVELTY - The seal (16) has a reservoir (20) that is configured to supply lubricant between surfaces of portion of the piston (2) and cylinder (4) in sealing contact and in motion relative to each other. The reservoir is provided with pressure adjusting units (21,22,24) that are arranged to vary the pressure within the reservoir in response to the changing pressure of a working fluid in the chamb…	A88 (Mechanical engineering and tools e.g. valves, gears and conveyor belts.); Q54 (Non-positive displacement fluid engines (i.e. driven by fluid); Miscellaneous motors and machines for producing mechanical power/thrust (F03B,D,G,H)); Q65 (Pistons, cylinders, packing (F16J)); Q68 (Other engineering elements (F16M-S)); X15 (Non-Fossil Fuel Power Generating Systems)	A12-H; A12-H08; X15-C01	F03B-013/18; F16J-001/08; F16J-015/16; F16N-009/04	GB2505704-A 12 Mar 2014 F03B-013/18 201421 Pages: 16 English	GB2505704-A GB016114 10 Sep 2012	GB016114 10 Sep 2012	DIIDW:2014E43346
157	P	CN115875175-A	Experimental device of double-degree-of-freedom coupling horizontal shaft water turbine, has pitching driving device that drives rotating shaft to rotate, so as to drive water turbine to swing along first direction.	WANG S	BEIJING INST PETROCHEMICAL TECHNOLOGY (SNPC-C)	202338678G	NOVELTY - The device has an experimental platform comprising a longitudinal oscillation simulation platform (2) comprising a longitudinal swinging driving device set between the longitudinal swinging supporting plate and supporting frame. The longitudinal swinging driving device drives the longitudinal swinging supporting plate to move back and forth along the first direction on the supporting fr…	Q54 (Non-positive displacement fluid engines (i.e. driven by fluid); Miscellaneous motors and machines for producing mechanical power/thrust (F03B,D,G,H)); X15 (Non-Fossil Fuel Power Generating Systems)	Q54-X; X15-C02	F03B-011/00; F03B-013/26	CN115875175-A 31 Mar 2023 F03B-011/00 202333 Chinese	CN115875175-A CN11719263 30 Dec 2022	CN11719263 30 Dec 2022	DIIDW:202338678G
158	P	CN114876711-A; CN114876711-B	Ocean observation station comprises bottom mounting of observation platform that has multiunit fixed column, and bottom end of observation platform is provided with first power generation assembly for utilizing ocean wave energy.	LI Z	QINGDAO JIERUI IND CONTROL TECHNOLOGY CO (QING-Non-standard)	2022A56817	NOVELTY - The ocean observation station comprises a bottom mounting of an observation platform (1) that has a multiunit fixed column (2). The terminal surface of the observation platform is provided with an observation station body (3). The lateral wall of observation platform is provided with passageway to one side extension. The bottom end of the observation platform is provided with a first po…	Q54 (Non-positive displacement fluid engines (i.e. driven by fluid); Miscellaneous motors and machines for producing mechanical power/thrust (F03B,D,G,H)); S02 (Engineering Instrumentation); X11 (Power Generation and High Power Machines); X15 (Non-Fossil Fuel Power Generating Systems)	Q54-X; S02-B04; X11-J07; X11-B01; X15-C03; X15-C02; X15-C01	B01D-029/03; B01D-029/64; F03B-011/08; F03B-013/20; F03B-013/22; F03B-013/26; G01C-013/00	CN114876711-A 09 Aug 2022 F03B-013/20 202274 Chinese	CN114876711-A CN10796752 08 Jul 2022	CN10796752 08 Jul 2022	DIIDW:2022A56817
159	P	CN114183290-A; CN114183290-B	Experimental device for floating-type horizontal shaft water turbine, has rotary mechanism in second mounting state that drives water turbine unit to do transverse reciprocating swing movement through floating body support.	NI Y	BEIJING INST PETROCHEMICAL TECHNOLOGY (SNPC-C)	202244032Q	NOVELTY - The device has experiment platform having a rotating mechanism and a floating body support. The floating body support is detachably set between the rotating mechanism and a water turbine unit. The rotating mechanism has a first mounting state and a second mounting state. The rotating mechanism in the first mounting state can drive the water turbine unit to do longitudinal reciprocating …	Q54 (Non-positive displacement fluid engines (i.e. driven by fluid); Miscellaneous motors and machines for producing mechanical power/thrust (F03B,D,G,H))	Q54-X	F03B-011/00; F03B-013/00	CN114183290-A 15 Mar 2022 F03B-011/00 202232 Chinese	CN114183290-A CN11468616 03 Dec 2021	CN11468616 03 Dec 2021	DIIDW:202244032Q
160	P	CN205714570-U	Tidal power generating device for flow guide cover, has hydraulic generator connected with rotating shaft, where hydraulic generator comprises blades, and plane whose cross-section is formed with horizontal surface.	LIN D	HANGZHOU LINDONG NEW ENERGY TECHNOLOGY (HANG-Non-standard)	201674174B	NOVELTY - The utility model claims a tidal power generating device and the guide sleeve. the tidal energy generating device comprises a frame, at least one rotating shaft, at least one drive unit, at least one horizontal shaft hydraulic generator and at least one fairing. the rotating shaft can be rotationally set on the frame. drive unit is located on the water surface, connected with the rotati…	Q54 (Non-positive displacement fluid engines (i.e. driven by fluid); Miscellaneous motors and machines for producing mechanical power/thrust (F03B,D,G,H)); X15 (Non-Fossil Fuel Power Generating Systems)	Q54-X; X15-C02	F03B-013/26; F03B-015/00	CN205714570-U 23 Nov 2016 F03B-013/26 201681 Pages: 19 Chinese	CN205714570-U CN20350312 22 Apr 2016	CN20350312 22 Apr 2016	DIIDW:201674174B
161	P	WO2010007437-A2; WO2010007437-A3; CA2730896-A1; EP2321527-A2; US2011116925-A1; CN102105681-A; US8851837-B2; EP2321527-B1; CA2730896-C	Energy extracting apparatus for driving turbines, has body with drag surface oriented in direction of tidal stream, and formation in drag surface promoting drag force on body to cause movement of body with tidal stream.	WHITELAW M	WATERAMP LTD (WATE-Non-standard)	2010B04120	NOVELTY - The apparatus (20) has a body (35) located in a tidal stream, and a line (30) coupled to a generator, where a relative movement between the line and the generator drives the generator. The body comprises a drag surface oriented in a direction of the tidal stream and comprising a formation. The formation promotes a drag force on the body to cause movement of the body with the tidal strea…	Q74 (Heating, ranges, ventilating (F24)); X15 (Non-Fossil Fuel Power Generating Systems)	X15-C02A1	F24J-000/00; F03B-013/26; F03B-013/16	WO2010007437-A2 21 Jan 2010 F24J-000/00 201009 Pages: 32 English	WO2010007437-A2 WOGB050871 16 Jul 2009	GB012937 16 Jul 2008	DIIDW:2010B04120
162	P	US6184590-B1	Coupling device for wave power generating system, has gate pivotally coupled on base and push rod connected between gate and generator.	LOPEZ R	LOPEZ R (LOPE-Individual)	2001243260	NOVELTY - A gate (30) moving in response to the waves, pivots and couples to the base positioned along ramp (60). Push rod (40) is pivotally coupled to the gate at one end and to the electrical power generator at other end.	Q55 (Positive displacement fluid machines/pumps/compressors (i.e. for driving fluid) (F04B,C)); X15 (Non-Fossil Fuel Power Generating Systems)	X15-C01	F03B-013/10; F03B-013/12	US6184590-B1 06 Feb 2001 F03B-013/10 200125 Pages: 8 English	US6184590-B1 US234869 21 Jan 1999	US234869 21 Jan 1999	DIIDW:2001243260
163	P	CN117299762-A	Method for repairing in-situ non-normal steel slag yard in coastal along river mudflat area, involves absorbing and filtering heavy metal in underground water by permeation reaction wall, and flowing underground water into wetland repairing area at two sides for realizing purification process.	ZHOU H	NANJING INST ENVIRONMENTAL SCI NAT BUREA (NAJI-C)	202403961Q	NOVELTY - The method involves absorbing a heavy metal in underground water by a permeation reaction wall (2) to realize primary purification. An artificial wetland repairing area (6) is obtained for realizing purification. The underground water in a steel slag yard (1) is made to flow from center of the steel slag yard to the permeation reaction wall at an outer side when dewetting or rainfall se…	P43 (Sorting, cleaning, waste disposal (B06, B07, B08, B09).)	P43-J	B09C-001/00; B09C-001/08	CN117299762-A 29 Dec 2023 B09C-001/00 202407 Chinese	CN117299762-A CN11733650 30 Dec 2022	CN11733650 30 Dec 2022	DIIDW:202403961Q
164	P	US2023131772-A1	Horizontal acoustic vector sensor system for use in acoustic intelligence and surveillance applications, has end cap for enclosing gimbal assembly within housing, and omnidirectional hydrophone integrated into side of end cap that is opposite to gimbal assembly.	BLAIN D C	LEIDOS INC (LEID-Non-standard)	202344519K	NOVELTY - The system has a gimbal assembly arranged within a housing (5) including a sensor assembly and an outer gimbal, where the sensor assembly includes multiple pairs of seismometers. Each pair of seismometers is arranged orthogonally to neighboring pairs of seismometers, along an approximately horizontal axis. An end cap (8) encloses the gimbal assembly within the housing. An omnidirectiona…	A89 (Photographic, laboratory equipment, optical - including electrophotographic, thermographic uses.); S03 (Scientific Instrumentation); V04 (Printed Circuits and Connectors)	A06-A00E4; S03-C01B; S03-C01C1; V04-A05; V04-L01A; V04-M01; V04-M05; V04-M30A; V04-M30G; V04-M30Q; V04-P02; V04-P07; V04-Q30A; V04-Q30G; V04-Q30Q; V04-V02	G01H-003/12; G01P-005/02; G01V-001/00; G01V-001/18; G01V-001/38	US2023131772-A1 27 Apr 2023 G01V-001/18 202338 English	US2023131772-A1 US061033 02 Dec 2022	US403446P 03 Oct 2016	DIIDW:202344519K
165	P	CN113446176-A; CN113446176-B	Generating device for recycling transverse mechanical energy of sailing ship, has main portion comprising back rotating shaft groove that is set on ship tail portion, and back rotating shaft which is set at back end of ship middle portion and matched with back rotating shaft groove.	ZHANG R	UNIV QINGDAO SCI & TECHNOLOGY (UYQS-C)	2021B5783B	NOVELTY - The generating device has a bow portion (1), a ship portion (2), a ship tail portion (3), a front rotating shaft groove (4), a front rotating shaft (5), a rear rotating shaft groove (6), a rear rotating shaft (7), a front generator (8), a rear generator (9), a front rack groove (10), a front annular rack (11), a rear rack groove (12) and a rear annular rack (13). The bow portion, the sh…	Q24 (Ships; waterborne vessels; related equipment (B63)); Q54 (Non-positive displacement fluid engines (i.e. driven by fluid); Miscellaneous motors and machines for producing mechanical power/thrust (F03B,D,G,H))	Q24-P22; Q24-A01; Q54-X	B63B-003/00; F03G-007/08	CN113446176-A 28 Sep 2021 F03G-007/08 202185 Chinese	CN113446176-A CN10878704 02 Aug 2021	CN10878704 02 Aug 2021	DIIDW:2021B5783B
166	P	WO2013041756-A1; AU2011377385-A1; US2014230426-A1; EP2817509-A1; AU2011377385-B2; US9631599-B2; EP2817509-A4; EP2817509-B1	Protective arrangement in wave energy recovery system, has connection rod that alters volume of space, where sealings and/or through holes which are provided between space and connection rod are protected against seawater.	TUOKKOLA Y	AW-ENERGY OY (AWEN-Non-standard)	2013E29743	NOVELTY - The arrangement in wave energy recovery system has a wing element that is hinged on its one edge to make a reciprocating motion in response to kinetic energy of waves or tidal currents. A wave energy recovery unit has a space (6a) which alters its volume with the help of a connection rod (3) making a reciprocating movement caused by the wing element. The sealings and/or through holes pr…	Q54 (Non-positive displacement fluid engines (i.e. driven by fluid); Miscellaneous motors and machines for producing mechanical power/thrust (F03B,D,G,H)); Q65 (Pistons, cylinders, packing (F16J)); X15 (Non-Fossil Fuel Power Generating Systems)	X15-C01; X15-C02	F03B-013/16; F03B-013/22; F03B-013/26; F16J-015/50; F03B-013/14; F03B-013/18	WO2013041756-A1 28 Mar 2013 F03B-013/16 201323 Pages: 27 English	WO2013041756-A1 WOFI050811 21 Sep 2011	AU377385 21 Sep 2011	DIIDW:2013E29743
167	P	WO2012080717-A1; EP2652206-A1; EP2652206-B1	Underwater anchorage providing method for remotely anchoring e.g. wave energy conversion device at fixed location to e.g. sea bed spaced apart from land, involves passing link through passage, where link is tensioned in use condition.	TODMAN M T	TIDALSTREAM LTD (TIDA-Non-standard)	2012H05978	NOVELTY - The method involves drilling a passage (3) from a shore to emerge at an underwater anchorage location. A flexible link e.g. cable (6), is passed through the passage, where the flexible link is tensioned in a use condition from the shore to anchor a marine device or structure (1) at the anchorage location, and the flexible link includes a float at an underwater end of the flexible link. …	Q42 (Hydraulic engineering, soil shifting and sewerage (E02, 3))		E02B-009/08; E02D-027/50; E02D-027/52	WO2012080717-A1 21 Jun 2012 E02D-027/50 201243 Pages: 16 English	WO2012080717-A1 WOGB052447 09 Dec 2011	GB021117 13 Dec 2010	DIIDW:2012H05978
168	P	CN214221649-U	Shaft oil distributor structure for tide energy generating device, has transmission shaft whose outer peripheral wall is sleeved with oil distribution shell, and hydraulic station electrically connected with control system.	JI Q	NANJING HIGH ACCURATE MARINE EQUIP CO LT (NANJ-Non-standard)	2021B0638R	NOVELTY - The utility model is suitable for power flow energy generating device technology field, claims a shaft oil distributor structure for power flow energy generating device, the outer peripheral wall of the transmission shaft is sleeved with an oil distribution shell, and the outer peripheral wall of the transmission shaft is symmetrically provided with a first oil path and a second oil pat…	Q54 (Non-positive displacement fluid engines (i.e. driven by fluid); Miscellaneous motors and machines for producing mechanical power/thrust (F03B,D,G,H)); Q57 (Fluid-pressure actuators; hydraulic/pneumatics in general (F15)); Q65 (Pistons, cylinders, packing (F16J)); Q67 (Pipes, joints, fittings (F16L))	Q54-A05; Q57-B; Q65-D; Q67-B01	F15B-013/02; F16L-039/06; F16J-015/16; F03B-003/14	CN214221649-U 17 Sep 2021 F15B-013/02 202178 Pages: 6 Chinese	CN214221649-U CN22768056 25 Nov 2020	CN22768056 25 Nov 2020	DIIDW:2021B0638R
169	P	CN108397332-A	Vertical shaft double-rotor tidal current energy water turbine with loading end plates, has rotating shaft that is connected to generator shaft and adapted for converting mechanical energy obtained by rotating rotor into electric energy.	XIE Y	ZHEJIANG PROVINCIAL INST COMMUNICATIONS (ZJIC-C)	201865235H	NOVELTY - The turbine has two rotors that are fixed on a rotating shaft (4). The rotating shaft is vertically installed and upper end is connected to a generator shaft. The rotating shaft is configured for converting mechanical energy obtained by rotating the rotor into electric energy. The two rotors are identical in structure and arranged vertically in series along the rotating shaft. Each roto…	Q54 (Non-positive displacement fluid engines (i.e. driven by fluid); Miscellaneous motors and machines for producing mechanical power/thrust (F03B,D,G,H)); X15 (Non-Fossil Fuel Power Generating Systems)	Q54-A05; Q54-X; X15-C02	F03B-013/26; F03B-003/12	CN108397332-A 14 Aug 2018 F03B-003/12 201857 Pages: 8 Chinese	CN108397332-A CN10134196 09 Feb 2018	CN10134196 09 Feb 2018	DIIDW:201865235H
170	P	CN106884757-A; CN207080313-U	Hydraulic transmission based tidal power generating device for flow type water turbine, has hydraulic cylinder transmission shaft arranged to form integrated hydraulic loop and realize conversion of kinetic energy to electrical energy.	CHEN B	UNIV DALIAN TECHNOLOGY (UYDA-C)	2017438298	NOVELTY - The device has a sealing cover (8) fixed on a side of a sealed cabin (1). A transmitting device is connected with the sealed cabin that comprises a fixing device and a rotating device. The fixing device comprises three hydraulic cylinders, a hydraulic cylinder support (5) and a fixing plate (11). A slide rail (6) is connected with a rotating shaft (9). A hydraulic loop is installed in t…	Q54 (Non-positive displacement fluid engines (i.e. driven by fluid); Miscellaneous motors and machines for producing mechanical power/thrust (F03B,D,G,H)); X15 (Non-Fossil Fuel Power Generating Systems)	Q54-X; X15-C02	F03B-011/00; F03B-013/26	CN106884757-A 23 Jun 2017 F03B-013/26 201752 Pages: 9 Chinese	CN106884757-A CN10190335 29 Mar 2017	CN10190335 29 Mar 2017	DIIDW:2017438298
171	P	CN202832953-U	Liquid pressure device for increasing water level using tidal energy, has sealing ring whose two ends are provided with pressing ring, where sealing ring provided with groove that is provided with piston ring.	CHEN Z	NINGBO ZHENHAI JIEDENG APPLIED TECHNOLOG (NING-Non-standard)	2013L17050	NOVELTY - With increasing water level of tide liquid pressure device, comprising a fixing frame, a reservoir, a floating block and an impeller, the lower end of the fixing frame is fixed on the seabed or coast side, top and the upper part higher than the sea, floating the sea is set on the fixing frame top part lower part; the impeller shaft is connected on the two sides of the floating block, a …	Q54 (Non-positive displacement fluid engines (i.e. driven by fluid); Miscellaneous motors and machines for producing mechanical power/thrust (F03B,D,G,H)); Q55 (Positive displacement fluid machines/pumps/compressors (i.e. for driving fluid) (F04B,C)); X15 (Non-Fossil Fuel Power Generating Systems)	X15-C02	F03B-013/26; F04B-053/00; F04B-009/10	CN202832953-U 27 Mar 2013 F03B-013/26 201355 Pages: 9 Chinese	CN202832953-U CN20360918 25 Jul 2012	CN20360918 25 Jul 2012	DIIDW:2013L17050
172	P	CN202157896-U	Tidal generating device, has output shaft formed as regular polygon column body, and positive rotation impeller and reverse rotation impeller that are separately fixed on front rotating shaft and rear rotating shaft.	WU H	WU H (WUHH-Individual)	2012D34347	NOVELTY - The device has an output shaft (21) formed as a regular polygon column body and fixedly connected with a bevel gear. A sealing box body (10) is arranged on a fixing base (1) of a guide rail (4) via front and rear surfaces of a rolling bearing (7). A front hollow rotating shaft (12) is connected with a gear group of a positive rotation gear (16). The rotating shaft is fixedly connected t…	Q54 (Non-positive displacement fluid engines (i.e. driven by fluid); Miscellaneous motors and machines for producing mechanical power/thrust (F03B,D,G,H)); X15 (Non-Fossil Fuel Power Generating Systems)	X15-C02	F03B-013/26	CN202157896-U 07 Mar 2012 F03B-013/26 201222 Pages: 9 Chinese	CN202157896-U CN20133570 29 Apr 2011	CN20133570 29 Apr 2011	DIIDW:2012D34347
173	P	CN115748597-A	Ecological landscape slope protection structure for use in coastal or along river zone, has push plate whose side is provided with conductor that is electrically connected with storage batteries to form closed loop, where two sides of push plate are provided with elastic piece for driving push plate.	SUN D	SHAOXING FINANCE & TOURISM SCHOOL (SHAO-Non-standard)	2023276213	NOVELTY - The structure has main body connected to a road (1). Two sides of the road are equidistantly provided with multiple streetlamps (11). A slope body (2) is obliquely arranged on a lower side of the road. A dam (3) is arranged at a side of the slope body. A flow cavity (31) is formed on the slope body. A side of the dam far away from the slope body is formed with a generating cavity. A gen…	Q54 (Non-positive displacement fluid engines (i.e. driven by fluid); Miscellaneous motors and machines for producing mechanical power/thrust (F03B,D,G,H)); ; V06 (Electromechanical Transducers and Small Machines); X16 (Electrochemical Storage); X15 (Non-Fossil Fuel Power Generating Systems); X12 (Power Distribution/Components/Converters); X11 (Power Generation and High Power Machines)	Q54-X; Q42-A02B; V06-M04; V06-M10; X16-B01; X16-G; X15-C02; X12-H06; X11-B05; X11-B06; X11-J05B	E02B-003/12; E02B-003/14; F03B-013/06; F03B-013/08; F03B-013/26; H02J-015/00; H02J-007/00; H02K-035/04; H02K-007/18	CN115748597-A 07 Mar 2023 E02B-003/12 202325 Chinese	CN115748597-A CN11583836 09 Dec 2022	CN11583836 09 Dec 2022	DIIDW:2023276213
174	P	WO2013186553-A1; GB2517873-A; EP2858888-A1; GB2517873-B; US2015251731-A1; EP2858888-B1; EP2858888-B8; US10035568-B2; GB2517873-C	Disconnectable permanent sub-sea mooring connector for connecting polyester lines in installation equipment, has connecting unit for connecting portions, and alignment unit for aligning portions, where portions are connectable to line.	TAYLOR R	FTL SUBSEA LTD (FTLS-Non-standard)	2013X28652	NOVELTY - The connector (100) has a connecting unit (115) for connecting two portions (105, 110). An alignment unit (120) aligns the portions. The portions are connectable to a mooring wire, chain or synthetic line. The alignment unit comprises a first alignment unit spanned across an internal bore of each portion and a second alignment unit i.e. rotational alignment unit, provided by other two p…	A95 (Transport - including vehicle parts, tyres and armaments.); Q24 (Ships; waterborne vessels; related equipment (B63))	A05-E01D; A12-W10; A12-W16; Q24-C01; Q24-C02; Q24-P08	B63B-021/50; B63B-021/04; F16B-007/00; F16B-007/04; F16G-011/12; F16G-015/04; B63B-021/20; B63B-021/00	WO2013186553-A1 19 Dec 2013 B63B-021/50 201402 Pages: 42 English	WO2013186553-A1 WOGB051535 11 Jun 2013	GB010263 11 Jun 2012	DIIDW:2013X28652
175	P	CN113847190-A	Device for generating electricity by using energy accumulated in ocean, has swinging plate device rotatably connected to top of surface of base body, and rotating wheel device rotatably connected to end of bracket far away from swinging plate device.	CHEN X	CHEN X (CHEN-Individual)	202209734B	NOVELTY - The device has a base body (2) fixed at a side of a bottom surface of a sea-side mountain body (1). A generating device (3) is fixed on a surface of the base body. An energy storage mechanism (4) and a power-assisted device (5) are fixed on a top surface of the base body and close to a position of the sea-side mountain body. The power-assisted device is fixed in the base body, and match…	P43 (Sorting, cleaning, waste disposal (B06, B07, B08, B09).); ; V06 (Electromechanical Transducers and Small Machines); X11 (Power Generation and High Power Machines); X15 (Non-Fossil Fuel Power Generating Systems)	P43-B01A; Q54-X; Q54-A05; V06-M10; X11-J05B; X11-B01; X15-C02; X15-C01	B08B-013/00; B08B-003/02; H02K-007/18; F03B-003/12; F03B-011/00; F03B-013/22	CN113847190-A 28 Dec 2021 F03B-013/22 202209 Chinese	CN113847190-A CN10975803 24 Aug 2021	CN10975803 24 Aug 2021	DIIDW:202209734B
176	P	US2014110263-A1; US10011916-B2	Producing superhydrophobic anodized surface of article used in e.g. marine vehicle, involves anodizing surface of substrate in acid, etching surface, repeatedly anodizing and etching surface, and coating surface with hydrophobic polymer.	BARBIER C N	UNIV PITTSBURGH (UPIT-C)	2014G92486	NOVELTY - Producing a superhydrophobic anodized surface, comprises: anodizing a surface of a substrate in an anodization acid to form pores; etching the surface with an etchant to widen an edge of each of the pores; repeatedly anodizing the surface in the anodization acid and etching the surface with the etchant until the edges of the pores overlap to form nano-sharp ridges; and coating the surfa…	A85 (Electrical applications.); M11 (Electroplating; electrolytic treatment of or with metals - including electro-deposition of metals, electro-plating apparatus, electro-forming, electro-erosion, spark erosion, anodising (electrophoretically) coating metals and electrolytic cleaning and polishing (C25).); X25 (Industrial Electric Equipment)	A04-E08; A04-E10; A11-B05; A12-B04E; M11-E01; X25-R05	C25D-011/12; C25D-011/24; C25D-011/08; C25D-011/10; C25D-011/26	US2014110263-A1 24 Apr 2014 C25D-011/24 201434 Pages: 27 English	US2014110263-A1 US057925 18 Oct 2013	US715864P 19 Oct 2012	DIIDW:2014G92486
177	P	CN116104675-A	Generating device for oscillating single floating body with double vertical pipeline, has power flow energy generating module fixed between double-pipe oscillating water column module, and fixed on bottom of buoyancy cabin module.	LI G	NANJING INST TECHNOLOGY (NANJ-C)	202353237X	NOVELTY - The device has a double-pipe oscillating water column module fixed at two ends of a buoyancy cabin module. Double vertical pipes i.e. hollow pipes are internally provided with an upper end air chamber (102) and a lower end water chamber (101). A power flow energy generating module is fixed between the double-pipe oscillating water column module, and fixed on a bottom portion of the buoy…	W06 (Aviation, Marine and Radar Systems); X15 (Non-Fossil Fuel Power Generating Systems)	W06-C01C; W06-C15G; X15-A02; X15-A10; X15-C01; X15-C02	B63B-035/44; F03B-013/14; F03B-013/24; F03B-013/26; H02S-010/10	CN116104675-A 12 May 2023 F03B-013/14 202346 Chinese	CN116104675-A CN10324615 29 Mar 2022	CN10324615 29 Mar 2022	DIIDW:202353237X
178	P	EP3978154-A1; WO2022069387-A1; TW202224801-A	Anti-fouling unit for being arranged on surface of e.g. ship, has power-receiving arrangement allowing positioning of unit on surface in two distinct orientations both involving enablement of arrangement to receive power from arrangement.	HIETBRINK R B	KONINK PHILIPS NV (PHIG-C)	202248402W	NOVELTY - The unit (1) has an electric circuit (30) includes a light-emitting arrangement (31) configured to emit anti-fouling light. A power-receiving arrangement (33) configured to receive power to be used for powering the light-emitting arrangement from an external power-supplying arrangement located on or near the surface, and a plate-shaped carrier slab (40) carrying the electric circuit. Th…	P43 (Sorting, cleaning, waste disposal (B06, B07, B08, B09).); W06 (Aviation, Marine and Radar Systems); X15 (Non-Fossil Fuel Power Generating Systems)	P43-B08; P43-U03; P43-U05; W06-C01C; W06-C07A; X15-B01A; X15-B03; X15-B06	B08B-017/02; B08B-017/06; B63B-059/04; A61L-002/10; F21V-023/00; F21W-107/20; F21Y-105/16	EP3978154-A1 06 Apr 2022 B08B-017/02 202231 Pages: 17 English	EP3978154-A1 EP199843 02 Oct 2020	EP199843 02 Oct 2020	DIIDW:202248402W
179	P	EP4239182-A1; US2023279832-A1; CA3191770-A1; CN116696645-A; JP2023129398-A; KR2023131141-A; AU2023201295-A1; HK20087897-A; BR102023004084-A2; IN202314012484-A; US12000367-B2	Hybrid system for generating tidal power, has shaft connected to circular gear such that shaft rotates when circular gear rotates, and dynamo attached to shaft such that rotation of shaft is transmitted to dynamo for power generation.	LAHIB M A	LAHIB M A (LAHI-Individual)	202392643Y	NOVELTY - The system has a tank (102) that is supported by a vertical gear (110) such that the tank travels in an upward direction and a downward direction with the vertical gear. The tank travels based on a vertical motion of a tide that lifts and lowers the tank. A shaft (118) is connected to a circular gear (112,114), where the shaft rotates when the circular gear rotates. A dynamo (116) is at…	Q54 (Non-positive displacement fluid engines (i.e. driven by fluid); Miscellaneous motors and machines for producing mechanical power/thrust (F03B,D,G,H)); X11 (Power Generation and High Power Machines); X15 (Non-Fossil Fuel Power Generating Systems)	Q54-X; X11-B; X11-D05; X11-J05; X15-C02	F03B-013/26; E02B-009/08; H02S-010/10; F03B-013/12; B01D-045/12; D06F-037/26; G01R-031/28	EP4239182-A1 06 Sep 2023 F03B-013/26 202373 Pages: 21 English	EP4239182-A1 EP000242 28 Oct 2022	US316544P 04 Mar 2022	DIIDW:202392643Y
180	P	WO2015177400-A1; AU2014394661-A1; EP3175110-A1; US2017175700-A1; EP3175110-A4; US10151293-B2; AU2014394661-B2; EP3175110-B1	Energy transfer arrangement of wave energy recovery apparatus for converting wave energy into electricity, has actuating mechanism transfers reciprocating motion of panel mechanically to linear motion of PTO unit.	PASANEN S	AW-ENERGY OY (AWEN-Non-standard)	201573993V	NOVELTY - The arrangement has a pivot shaft (4) for a reciprocating panel (2). A driving and power-take-off (PTO) arrangement (5) is equipped with an actuating mechanism (6). A power-take-off (PTO) unit (7) converts kinetic energy of waves or tidal currents to another type of energy. The PTO unit comprises a power transmission mechanism (6d). The actuating mechanism transfers reciprocating motion…	Q54 (Non-positive displacement fluid engines (i.e. driven by fluid); Miscellaneous motors and machines for producing mechanical power/thrust (F03B,D,G,H)); X15 (Non-Fossil Fuel Power Generating Systems)	X15-C01; X15-C02	F03B-013/18; F16H-019/04; F16H-031/00	WO2015177400-A1 26 Nov 2015 F03B-013/18 201581 Pages: 32 English	WO2015177400-A1 WOFI050397 22 May 2014	AU394661 22 May 2014	DIIDW:201573993V
181	P	CN111963367-A	Tidal power generation module with sludge removal, has fourth bevel gear which meshes with third bevel gear, and pull rope fixedly connected to upper inner wall of transmission cavity is provided on right side of incomplete gear.	LIAO X	JIANDE LINXIN NEW ENERGY TECHNOLOGY CO (JIAN-Non-standard)	2020B8135Q	NOVELTY - The module has a drainage cavity which is arranged in the dike (10), and a power generation mechanism is arranged in the drainage cavity. A first rotating shaft is dynamically connected to the motor, and a first bevel gear and a second bevel gear are fixedly connected to the first rotating shaft. A short shaft is rotatably connected to the end of the connecting rod, and a third bevel ge…	Q42 (Hydraulic engineering, soil shifting and sewerage (E02, 3)); Q54 (Non-positive displacement fluid engines (i.e. driven by fluid); Miscellaneous motors and machines for producing mechanical power/thrust (F03B,D,G,H)); X11 (Power Generation and High Power Machines); X15 (Non-Fossil Fuel Power Generating Systems)	Q42-A02A; Q42-A03; Q42-A10; Q54-X; X11-B01; X11-J05; X15-C02A2	E02B-007/20; E02B-009/00; E02F-005/28; F03B-011/08; F03B-013/26	CN111963367-A 20 Nov 2020 F03B-013/26 202001 Pages: 13 Chinese	CN111963367-A CN10923173 04 Sep 2020	CN10923173 04 Sep 2020	DIIDW:2020B8135Q
182	P	CN111765401-A	Lamp for ensuring visual degree of navigation mark for a ship, has a spraying block, whose bottom end surface is fixedly provided with nozzle, where top end surface of spray head is fixedly connected with end of pipeline.	LIN J	ZHUJI PINGCUO LIGHTING TECHNOLOGY CO LTD (ZHUJ-Non-standard)	2020A1939V	NOVELTY - The lamp has a rotating blade cavity, whose inner top wall is provided with a transmission cavity. A inner top wall of the transmission cavity is provided with a ratchet cavity. An inner top wall of the ratchet cavity is provided with a wind cavity. A top end surface of a shell is fixedly provided with a lamp main body. A fixing rod is fixedly provided with a spraying block. An inner bo…	P14 (Animal management and care (A01K, L, M).); P43 (Sorting, cleaning, waste disposal (B06, B07, B08, B09).); Q71 (Lighting (F21))	P14-B01; P43-B99; P43-U03; P43-U05; Q71-T99	A01M-029/32; A01M-029/34; B08B-001/04; B08B-013/00; F21S-008/00; F21V-033/00	CN111765401-A 13 Oct 2020 F21S-008/00 202088 Pages: 11 Chinese	CN111765401-A CN10692296 17 Jul 2020	CN10692296 17 Jul 2020	DIIDW:2020A1939V
183	P	CN212318209-U; CN113775465-A; WO2021248369-A1; KR2023009976-A; CA3186966-A1; EP4166779-A1; US2023151792-A1; EP4166779-A4; JP2023529902-W	Total forming platform for large tidal power generating device, has two stress supporting pieces whose ends are respectively installed on left and right sides of horizontal shaft hydraulic generator along water flow direction.	LIN D	HANGZHOU LINHUANGDING NEW ENERGY TECHNOL (HANG-Non-standard)	2021086939	(CN212318209-U) NOVELTY - The utility model claims a large tide energy generating device and assembly platform thereof, the assembly platform is equipped with at least one horizontal shaft hydraulic generator. The assembly platform comprises at least four fixing piles, at least two stress blocking pieces, at least two stress supporting pieces and a bracket. at least four fixing piles are integral…	Q42 (Hydraulic engineering, soil shifting and sewerage (E02, 3)); Q54 (Non-positive displacement fluid engines (i.e. driven by fluid); Miscellaneous motors and machines for producing mechanical power/thrust (F03B,D,G,H)); X15 (Non-Fossil Fuel Power Generating Systems)	Q42-A03; Q42-A10; Q54-X; X15-C02	E02B-017/00; E02B-009/08; F03B-013/26; F03B-011/00; F03B-003/04; F03B-003/12; F03B-017/06	CN212318209-U 08 Jan 2021 F03B-013/26 202108 Pages: 36 Chinese	CN212318209-U CN21053913 10 Jun 2020	CA3186966 10 Jun 2020	DIIDW:2021086939
184	P	CN113914273-A; CN113914273-B	Anti-collision device for bay drain, has auxiliary roller assembly that is set at hollow adjusting frame assembly and whose portion passes through inner interlayer of sides of C-shaped moving cylinder to outer wall of C-shaped moving cylinder.	XU M	MNR OCEANOGRAPHY SECOND INST (GJHY-C)	202215799U	NOVELTY - The device has a C-shaped moving cylinder (16) whose inner top close to a side tooth disc assembly is equipped with a gear driving assembly capable of driving the side tooth disc assembly to slide in a C-shaped limiting groove assembly. An inner interlayer of the C-shaped moving cylinder is provided with a belt wheel conveying component. An end portion of the belt wheel conveying compon…	Q42 (Hydraulic engineering, soil shifting and sewerage (E02, 3)); Q54 (Non-positive displacement fluid engines (i.e. driven by fluid); Miscellaneous motors and machines for producing mechanical power/thrust (F03B,D,G,H)); X15 (Non-Fossil Fuel Power Generating Systems)	Q42-A; Q54-X; X15-C02	E02B-015/08; F03B-013/26	CN113914273-A 11 Jan 2022 E02B-015/08 202214 Chinese	CN113914273-A CN11169419 08 Oct 2021	CN11169419 08 Oct 2021	DIIDW:202215799U
185	P	CN113719401-A; CN113719401-B	Vertical rotary blade wheel type ocean tidal power generating device has permanent magnet group that is provided in rotor spaced along axial direction of rotary impeller cylinder where rotor permanent magnet group and stator coil group are alternately distributed in axial direction.	LI W	UNIV NORTHEAST PETROLEUM (UYPT-C)	2021E70618	NOVELTY - The device has multiple stator coils. Multiple stator coils are evenly arranged along the outer surface of the stator central axis. Multiple stator coils in the same plane constitute a stator coil group. The wire of the stator coil is led out through the central hole of the central axis of the stator and connected to the external substation. A water-proof and anti-rust glue is sprayed o…	Q54 (Non-positive displacement fluid engines (i.e. driven by fluid); Miscellaneous motors and machines for producing mechanical power/thrust (F03B,D,G,H)); X15 (Non-Fossil Fuel Power Generating Systems)	Q54-X; Q54-A05; X15-C02; X15-C01	F03B-003/12; F03B-013/22; F03B-013/26	CN113719401-A 30 Nov 2021 F03B-013/26 202202 Chinese	CN113719401-A CN11049014 08 Sep 2021	CN11049014 08 Sep 2021	DIIDW:2021E70618
186	P	FR2976326-A1	Braking module for e.g. small vertical axis wind turbine, used in energy production installation installed in e.g. industrial space in urban environment, has activation unit allowing connection between generator and production unit.	MILET H L M	OKWIND SAS (OKWI-Non-standard)	2012R14325	NOVELTY - The module (31) has a driving member adapted to be driven rotatably according to mechanical engine torque by fluid current to deliver energy to an applied load, via a generator. The generator includes a set of reels and magnets. A production unit produces electrical resistive torque whose value is higher than that of the engine torque. An activation unit allows connection between the ge…	Q54 (Non-positive displacement fluid engines (i.e. driven by fluid); Miscellaneous motors and machines for producing mechanical power/thrust (F03B,D,G,H)); T01 (Digital Computers); X11 (Power Generation and High Power Machines); X15 (Non-Fossil Fuel Power Generating Systems)	T01-S03; X11-B01; X11-B10; X11-J05A; X11-U01E; X11-U07; X15-B01A6; X15-B01B; X15-B05; X15-C02	F03B-013/00; F03B-015/00; F03D-011/00; F03D-007/00; F03D-009/00; H02K-007/106	FR2976326-A1 14 Dec 2012 F03D-011/00 201302 Pages: 38 French	FR2976326-A1 FR055078 09 Jun 2011	FR055078 09 Jun 2011	DIIDW:2012R14325
187	P	GB2207711-A; BR8803855-A; US4859866-A; GB2207711-B	Electrical power generation using tidal energy has adjustable sluices to cause water to flow only in uni-direction through turbine irrespective of tide direction.	HORNE C	HORNE C (HORN-Individual)	1989041252	The power generation arrangement has one or more turbines (8) designed for unidirectional flow and mounted in a wall (7) which divides an enclosed space (4) into two areas (4a,4b). Adjustable sluices (9a,9b:10a,10b) are between the areas (4a,4b) and tidal water source (3) or basin (2) are arranged so that, irrespective of the tide direction, the sluices can be adjusted to cause water to flow only…	Q55 (Positive displacement fluid machines/pumps/compressors (i.e. for driving fluid) (F04B,C)); X11 (Power Generation and High Power Machines); X15 (Non-Fossil Fuel Power Generating Systems)	X11-B09; X15-C01	F03B-013/26; F03B-013/12; F03B-013/00	GB2207711-A 08 Feb 1989 F03B-013/26 198906 Pages: 11 English	GB2207711-A GB013705 09 Jun 1988	GB018551 05 Aug 1987	DIIDW:1989041252
188	P	CN116125448-A	Blind type underwater acoustic marker for underwater engineering, has marker fixed frames in different arrangement sequences installed on surface of rectangular marker backing plate, and marker panel installed inside marker fixed frame, where marker fixed frame and marker panel are square shaped.	PENG Z	WUHAN CHANGJIANG WATERWAY RESCURE & SALV (WUHA-Non-standard)	202355307C	NOVELTY - The marker has the marker fixed frames (3) in different arrangement sequences installed on the surface of a rectangular marker backing plate (1). A marker panel (5) is installed inside the marker fixed frame. The marker fixed frame and the marker panel are square shaped. The top edge of the fixed frame of the marker is bent, and the top edge of the fixed frame of the marker is bent inwa…	W06 (Aviation, Marine and Radar Systems)	W06-A05C	G01S-007/52	CN116125448-A 16 May 2023 G01S-007/52 202347 Chinese	CN116125448-A CN11592381 13 Dec 2022	CN11592381 13 Dec 2022	DIIDW:202355307C
189	P	WO9003516-A; EP436023-A; US5184936-A; EP436023-B1; DE68915287-E; KR9609217-B1	Multiple gaseous phase system tide range power generation system - has air containers in natural seal communicating with second group of containers in natural dam.	NOJIMA H	PARASIGHT YG (PARA-Non-standard)	1990132326	The system comprises a container group formed by disposing in many stages, fixed containers (1-4), each having an open lower surface and capable of storing air. They are in parallel with one another and have predetermined gaps between them in a natural seat having the tide range. A second container group is formed by disposing in many stages fixed containers (5-8), each having an open lower surfa…	Q55 (Positive displacement fluid machines/pumps/compressors (i.e. for driving fluid) (F04B,C))		F03B-013/26; F03B-013/12	WO9003516-A 05 Apr 1990 F03B-013/26 199017 English	WO9003516-A WO000946 19 Sep 1989	JP236962 21 Sep 1988	DIIDW:1990132326
190	P	FR2896277-A1	Tidal power device for generating electricity, permits to use pressure differences created by tides on installation to produce electricity by air circulating via turbines between stacked detachable modules, and counterweights regulating air.	DESSAIGNE M	DESSAIGNE M (DESS-Individual)	2007667932	NOVELTY - The device permits to use pressure differences created by tides on an installation (103) at the sea bottom to produce electricity, by using pressurized air (104) circulating via turbines (105) placed between detachable monoblock modules (106) stacked in racks. The turbines are activated by the pressure and depression of the air. Counterweights (109) regulate the pressurized air in modul…	Q54 (Non-positive displacement fluid engines (i.e. driven by fluid); Miscellaneous motors and machines for producing mechanical power/thrust (F03B,D,G,H)); X15 (Non-Fossil Fuel Power Generating Systems)	X15-C02	F03B-013/26	FR2896277-A1 20 Jul 2007 F03B-013/26 200763 Pages: 25 French	FR2896277-A1 FR000434 18 Jan 2006	FR000434 18 Jan 2006	DIIDW:2007667932
191	P	CN117291429-A; CN117291429-B	Method for evaluating quality and safety risk of water conservancy project based on large data analysis, involves presetting risk assessment threshold and analyzing comprehensive quality coefficient.	YANG S	TIANJIN YANGTIAN ENVIRONMENTAL PROTECTIO (TIAN-Non-standard)	202402189H	NOVELTY - The method involves setting (S1) several detection points around an engineering construction site of a tidal power station and collecting comprehensive construction data, environment data and tidal data of an engineering construction site of the tidal power station in real time. A digital twin model of the engineering construction of the tidal power station is established (S2) to form a…	T01 (Digital Computers)	T01-J05A1; T01-J05A2C	G06Q-010/04; G06Q-010/0635; G06Q-010/0637; G06Q-010/067; G06Q-050/06; G06Q-050/08	CN117291429-A 26 Dec 2023 G06Q-010/0635 202405 Chinese	CN117291429-A CN11575160 24 Nov 2023	CN11575160 24 Nov 2023	DIIDW:202402189H
192	P	CN114837878-A	Semi-floating power flow energy bidirectional generating device, has floating chamber for providing buoyancy to generating mechanism, side flow guiding plates and bottom flow guide plate for guiding water flow, and filter mechanism for filtering impurities in water stream.	CHEN L	CHANGCHUN INST TECHNOLOGY (UCCI-C)	2022A3015C	NOVELTY - The device comprising a floating chamber (1), where two sides of the floating chamber are fixedly connected with side flow guiding plates (2). A bottom part of the side flow guiding plates is connected with each other by a bottom flow guide plate (3). A generating mechanism is mounted between side flow guiding plates. A filter mechanism (5) is provided on sides of the generating mechani…	Q54 (Non-positive displacement fluid engines (i.e. driven by fluid); Miscellaneous motors and machines for producing mechanical power/thrust (F03B,D,G,H)); X15 (Non-Fossil Fuel Power Generating Systems)	Q54-X; X15-C02	F03B-011/00; F03B-013/26	CN114837878-A 02 Aug 2022 F03B-013/26 202268 Chinese	CN114837878-A CN10636068 07 Jun 2022	CN10636068 07 Jun 2022	DIIDW:2022A3015C
193	P	CN113700588-A	Ocean energy collecting method for enhancing power generation efficiency, involves restoring water flow judging device to neutral position, and stopping generating device rotating to maintain maximum utilization efficiency of ocean current kinetic energy.	YU Y	YU Y (YUYY-Individual)	2021E2602Y	NOVELTY - The method involves installing a direction adjusting device on a seabed land. The direction of a generating device is adjusted. The generating device channel direction is overlapped with an ocean current square to ensure a minimum included angle between the ocean current direction and the generating device. A water flow judging device is restored to a neutral position when the included …	Q54 (Non-positive displacement fluid engines (i.e. driven by fluid); Miscellaneous motors and machines for producing mechanical power/thrust (F03B,D,G,H)); X11 (Power Generation and High Power Machines)	Q54-X; Q54-A05; X11-B01	F03B-013/00; F03B-003/18	CN113700588-A 26 Nov 2021 F03B-003/18 202204 Chinese	CN113700588-A CN10829987 22 Jul 2021	CN10829987 22 Jul 2021	DIIDW:2021E2602Y
194	P	WO2015193532-A1; AU2014397698-A1; AU2014397698-A8; US2017114769-A1; EP3175111-A1; EP3175111-A4; AU2014397698-B2; US10364790-B2; EP3175111-B1	Wave energy recovery apparatus, has pistons fastened with free ends to common connecting plate that is arranged to move pistons simultaneously inwards into cylinders and to draw pistons simultaneously outwards from cylinders.	PASANEN S	AW-ENERGY OY (AWEN-Non-standard)	201582503F	NOVELTY - The apparatus has a driving and power-take-off (PTO) arrangement equipped with an actuating mechanism. PTO units (7) convert kinetic energy of waves or tidal currents to another type of energy. Each PTO unit comprises a hydraulic power transmission mechanism including hydraulic cylinders (7h) with pistons (9) inside the cylinders. The pistons are fastened with free ends to a common conn…	A88 (Mechanical engineering and tools e.g. valves, gears and conveyor belts.); Q54 (Non-positive displacement fluid engines (i.e. driven by fluid); Miscellaneous motors and machines for producing mechanical power/thrust (F03B,D,G,H)); Q57 (Fluid-pressure actuators; hydraulic/pneumatics in general (F15)); X15 (Non-Fossil Fuel Power Generating Systems)	A12-H; Q54-X; Q57-X; X15-C01	F03B-013/18; F15B-021/00; F03B-013/26	WO2015193532-A1 23 Dec 2015 F03B-013/18 201607 Pages: 40 English	WO2015193532-A1 WOFI050485 18 Jun 2014	AU397698 18 Jun 2014	DIIDW:201582503F
195	P	US2012013128-A1; US8421260-B2	Hydrokinetic turbine for extraction of energy from moving ambient fluid such as ocean waves, has central upstream coaxial hub and rotor assembly causing angular acceleration of ambient flow in tangentially and radially inward direction.	DUKE J H	DUKE J H (DUKE-Individual)	2012A97047	NOVELTY - The hydrokinetic turbine has central upstream coaxial hub (150) and a rotor assembly (170) deflecting ambient flow in the radially outward direction and causing angular acceleration of ambient flow in the tangentially and radially inward direction. A concentric array of deflector surfaces is provided at the downstream side of the hub and rotor assembly and rotated as a reaction to the a…	Q54 (Non-positive displacement fluid engines (i.e. driven by fluid); Miscellaneous motors and machines for producing mechanical power/thrust (F03B,D,G,H))		F03B-013/10; F03B-013/00; H02P-009/04	US2012013128-A1 19 Jan 2012 F03B-013/10 201208 Pages: 11 English	US2012013128-A1 US804239 19 Jul 2010	US804239 19 Jul 2010	DIIDW:2012A97047
196	P	CN113529772-A; CN113529772-B	Method for transporting caisson out of energy-saving ramp used for heavy object transportation in ship, involves using third hoist and fourth hoist to tow caisson to be shipped through wire rope until caisson is pulled to slope and caisson is moved by own gravity.	ZHU G	JIANGSU ZHUGANG CONSTR GROUP CO LTD (JIAN-Non-standard)	2021C3915K	NOVELTY - The method involves constructing (S1) a shipping slope, the top of the slope is connected with the caisson placement platform, and the bottom of the slope is provided with a floating pit. The shipping equipment is set up (S2), and which includes a first hoist and a second hoist are arranged on the caisson placement platform, and a third hoist and a fourth hoist are arranged on the slope…	Q42 (Hydraulic engineering, soil shifting and sewerage (E02, 3))	Q42-A10	E02D-023/02; E02D-023/12	CN113529772-A 22 Oct 2021 E02D-023/12 202195 Chinese	CN113529772-A CN10787571 13 Jul 2021	CN10787571 13 Jul 2021	DIIDW:2021C3915K
197	P	IN201841036435-A	Portable vibration energy to electrical energy conversion device for nickel-cadmium battery charging, has piezoelectric crystal mounted with triangular cantilever beam to convert vibrations from vibration sources into electrical energy.	KAVIN P	PSG COLLEGE PHARMACY (PSGC-Non-standard)	202028462S	NOVELTY - The portable energy conversion device has a rectangular housing (110) having triangular cantilever beams (102) that are arranged perpendicular to each other in an inner portion of the rectangular housing to collect vibrations from vibration sources. The piezoelectric crystal (108) is mounted with a triangular cantilever beam to convert the vibrations collected from vibration sources int…	P33 (Medical aids, oral administration (A61G, H, J).); ; S05 (Electrical Medical Equipment); T03 (Data Recording); V06 (Electromechanical Transducers and Small Machines); X16 (Electrochemical Storage)	P33-A20; Q54-X; S05-A05E; T03-L05B; T03-L05N; T03-M05; V06-M06D; V06-U03; V06-U04B; V06-V01E; V06-V04P; X16-B01A1; X16-G	A61H-023/02; F03G-007/08; F21S-009/03; G11B-033/08; H02N-002/18	IN201841036435-A 03 Apr 2020 H02N-002/18 202032 Pages: 19 English	IN201841036435-A IN41036435 27 Sep 2018	IN41036435 27 Sep 2018	DIIDW:202028462S
198	P	US2008197632-A1; US7511386-B2	Air-blower tidal power generation device for being installed in vessel or ship, has buoy of air-blower mechanism moved up and down by tides to drive pumping device to cyclically draw and pump air.	LIN M	LIN M (LINM-Individual)	2008L83746	NOVELTY - The device has an air-blower mechanism comprising a pumping device (11) including a stationary barrel (15) located at an opposite end of the pumping device and in fluid communication with an air conduit (13). A rack (20) carries the air-blower mechanism in the rack, and a power generation mechanism (30) comprises a constant-pressure and pressure-regulation device (31) connected to and i…	A88 (Mechanical engineering and tools e.g. valves, gears and conveyor belts.); Q54 (Non-positive displacement fluid engines (i.e. driven by fluid); Miscellaneous motors and machines for producing mechanical power/thrust (F03B,D,G,H)); X15 (Non-Fossil Fuel Power Generating Systems)	A12-H; X15-C02	F03B-013/26; F03B-013/12	US2008197632-A1 21 Aug 2008 F03B-013/26 200869 Pages: 11 English	US2008197632-A1 US706415 15 Feb 2007	US706415 15 Feb 2007	DIIDW:2008L83746
199	P	WO2013190316-A1; EP2864551-A1; US2015152621-A1	Mounting system for mounting structure e.g. wave power device to base of sea bed in offshore, has deformable element whose shear stress biases bearing surface towards further bearing surface when mounting structure is mounted to base.	MONTAGUE R	AQUAMARINE POWER LTD (AQUA-Non-standard)	2013X44282	NOVELTY - The mounting system has a mounting structure (4) for mounting to a base (6). The bearing (14) at one end of base and mounting structure, comprises a resilient deformable element having a bearing surface. The other end of the base and the mounting structure comprises further bearing surface for engagement with the bearing surface of the bearing. The shear stress of the deformable element…	A93 (Roads, building, construction flooring.); Q42 (Hydraulic engineering, soil shifting and sewerage (E02, 3)); X15 (Non-Fossil Fuel Power Generating Systems)	A12-H03; A12-W16; X15-B01A; X15-B03; X15-B06; X15-C01B2; X15-C02	E02D-027/52	WO2013190316-A1 27 Dec 2013 E02D-027/52 201405 Pages: 61 English	WO2013190316-A1 WOGB051629 20 Jun 2013	GB010882 20 Jun 2012	DIIDW:2013X44282
200	P	CN114352468-A; WO2023077713-A1	Super high-efficiency power generating device using tidal pressure, has flywheel that is provided on high-speed shaft and high-speed shaft whose other end is connected with generator, to realize power generation and generator that is installed on generator support installed and fixed on base.	LAI G	LAI G (LAIG-Individual)	202259399G	NOVELTY - The device has a pressure chamber opening that is downwardly installed on a pressure chamber fixing frame which is arranged on a seabed. The top of a pressure chamber (24) is connected to one end of a pressure pipe (23). The other end of the pressure pipe is connected to one end of a booster valve. The other end of the booster valve is installed on a cylinder tube (17). The cylinder tub…	Q54 (Non-positive displacement fluid engines (i.e. driven by fluid); Miscellaneous motors and machines for producing mechanical power/thrust (F03B,D,G,H)); V06 (Electromechanical Transducers and Small Machines); X11 (Power Generation and High Power Machines); X15 (Non-Fossil Fuel Power Generating Systems)	Q54-X; V06-M10; X11-J05X; X11-J05B; X11-J05A; X11-B; X15-C02	F03B-013/26; H02K-007/02; H02K-007/10; H02K-007/18	CN114352468-A 15 Apr 2022 F03B-013/26 202244 Chinese	CN114352468-A CN11302100 04 Nov 2021	CN11302100 04 Nov 2021	DIIDW:202259399G
201	P	CN116557198-A	Pumped-storage wind-wave power generation device for pumping water and storing energy in ocean energy, has power generation device that is fixedly installed on bottom frame and belt is connected and installed between windmill and power generation device.	HUANG Z	HUANG G (HUAN-Individual)	2023858459	NOVELTY - The device has a connecting rod (23) fixedly installed on the bottom frame (1). Multiple floating waterwheels (3) are uniformly arranged and installed on the bottom frame. The middle portion of the floating (2) waterwheel is fixedly installed with a floating rotating shaft. The floating rotating shaft is rotatably installed in the bottom frame. The bottom frame is fixedly installed with…	Q54 (Non-positive displacement fluid engines (i.e. driven by fluid); Miscellaneous motors and machines for producing mechanical power/thrust (F03B,D,G,H)); X15 (Non-Fossil Fuel Power Generating Systems); X11 (Power Generation and High Power Machines)	Q54-G; Q54-X; X15-B01A5; X15-B05; X15-C01; X15-C02; X11-B06; X11-U01E	F03B-013/06; F03B-013/14; F03D-001/06; F03D-013/25; F03D-007/02; F03D-009/00	CN116557198-A 08 Aug 2023 F03B-013/14 202369 Chinese	CN116557198-A CN10378338 11 Apr 2023	CN10378338 11 Apr 2023	DIIDW:2023858459
202	P	CN114153888-A	Method for detecting abnormal value of time series data, involves determining first abnormal data set of time sequence data with abnormal outlier degree according to preset first range parameter, comparing whether numbers of first abnormal data set and second abnormal data set are consistent.	LIN L	UNIV DALIAN TECHNOLOGY (UYDA-C)	202241085H	NOVELTY - The method involves determining (S110) the first abnormal data set with abnormal outlier degree in the time series data. The average distance difference of the first abnormal data set relative to the target data point is calculated (S120). A determination is performed (S130) whether the average distance difference is greater than the threshold. A second abnormal data set with an abnorma…	T01 (Digital Computers); X15 (Non-Fossil Fuel Power Generating Systems)	T01-J05B4P; X15-C03; X15-C02	G06F-016/215; G06F-016/2458	CN114153888-A 08 Mar 2022 G06F-016/2458 202230 Chinese	CN114153888-A CN10933906 08 Sep 2020	CN10933906 08 Sep 2020	DIIDW:202241085H
203	P	US2014363301-A1	Rotational turbine for translating kinetic energy of wind into usable torque, has each blade curved axially along its entire length and having chord length which increases from hub to blade outer diameter.	SMITH J M	SMITH J M (SMIT-Individual)	2014W24573	NOVELTY - The rotational turbine has blades (1) attached to a hub (2). Each blade is axially curved along its entire length. The chord length of the blade increases along the length of the blade from the hub to the blade outer diameter.	Q52 (Reaction engines: external combustion; gas turbines; rockets (F01D, F02C, F02K, F02M))		F01D-005/02	US2014363301-A1 11 Dec 2014 F01D-005/02 201513 Pages: 19 English	US2014363301-A1 US913622 10 Jun 2013	US913622 10 Jun 2013	DIIDW:2014W24573
204	P	IN201941018260-A; IN505149-B	System for harnessing wave energy, has elastic unit whose biasing force is overcome by external force, such that change of volume between contracted and expanded state results in suction and discharge of fluid into and from enclosure.	REDDY K B	REDDY K B (REDD-Individual)	2020B5927K	NOVELTY - The system (100) has a first enclosure (120) for receiving fluid. A flexible membrane (104b) defines a portion of the first enclosure. A first elastic unit (118) is connected to the flexible membrane on one side and to another unit connected to a float (114) on another side. The first elastic unit biases the flexible membrane to facilitate the first enclosure to assume a contracted stat…	D16 (Fermentation industry - including fermentation equipment, brewing, yeast production, production of pharmaceuticals and other chemicals by fermentation, microbiology, production of vaccines and antibodies, cell and tissue culture and genetic engineering.); D13 (Other foodstuffs and treatment - including preservation of food, milk, milk products, butter substitutes, edible oils and fats, non-a…	D03-G; D05-A03; M25-B	A23K-020/147; B82Y-030/00; C08L-097/02; C12P-019/04; C22B-003/00; A01L-001/00	IN201941018260-A 13 Nov 2020 A23K-020/147 202099 Pages: 36 English	IN201941018260-A IN41018260 07 May 2019	IN41018260 07 May 2019	DIIDW:2020B5927K
205	P	CN107816020-A; CN107816020-B	Developing ocean current energy resources based on reef enchantment useful for whole tidal channel and entire sea area comprises e.g. initial identification of current energy resources development in target sea areas.	HE Y	ZHEJIANG GUOGAO ENERGY TECHNOLOGY CO LTD (ZHEJ-Non-standard)	201823870L	NOVELTY - Developing ocean current energy resources based on reef enchantment comprises e.g. (i) initial identification of current energy resources development in target sea areas to obtain number of possible development areas, (ii) combining existing water depths in all possible development areas, sea length and width, wind wave parameters and current data, calculating and predicting through ree…	Q42 (Hydraulic engineering, soil shifting and sewerage (E02, 3)); T01 (Digital Computers)	Q42-A03; T01-J05A2B; T01-J21C	E02B-009/08	CN107816020-A 20 Mar 2018 E02B-009/08 201827 Pages: 20 Chinese	CN107816020-A CN11084719 07 Nov 2017	CN11084719 07 Nov 2017	DIIDW:201823870L
206	P	CN114483429-A	Tidal energy generating system for use in tidal energy hydropower station for generating tidal energy in sea, has reservoir set on seaside, and base ground at water outlet of the impounding reservoir is provided with bearing platform.	GAO C	GAO C (GAOC-Individual)	202270037J	NOVELTY - The tidal energy generating system comprises a reservoir set on the seaside. The first side of the reservoir towards the ocean is provided a water passing port. The base ground at the water outlet of the impounding reservoir is provided with a bearing platform (1). The bearing platform is higher than the pool bottom of the water storage pool. The bearing platform is provided with a lift…	Q54 (Non-positive displacement fluid engines (i.e. driven by fluid); Miscellaneous motors and machines for producing mechanical power/thrust (F03B,D,G,H)); X15 (Non-Fossil Fuel Power Generating Systems)	Q54-X; X15-C02	F03B-011/00; F03B-013/26	CN114483429-A 13 May 2022 F03B-013/26 202252 Chinese	CN114483429-A CN10040738 14 Jan 2022	CN10040738 14 Jan 2022	DIIDW:202270037J
207	P	CN109255361-A; CN109255361-B	Non-feasible area tidal energy power generating field layout method, involves updating iteration times when maximum iteration times are not-reached, and generating target solution, and calculating daily capacity of power generating field.	REN Z	UNIV CHONGQING (UYCQ-C)	2019103491	NOVELTY - The method involves utilizing particle swarm algorithm for optimizing a layout planning of a tidal energy power generation field based on daily output power of the tidal energy power generating filed. Determination is made to check whether maximum iteration times are reached currently. An optimal tidal flow field planning scheme is obtained with an individual minimum optimized target wh…	T01 (Digital Computers); X15 (Non-Fossil Fuel Power Generating Systems)	T01-J05A2; T01-J10B2; X15-C02	G06K-009/62; G06N-003/00; G06Q-010/06; G06Q-050/06	CN109255361-A 22 Jan 2019 G06K-009/62 201925 Pages: 24 Chinese	CN109255361-A CN10557050 01 Jun 2018	CN10557050 01 Jun 2018	DIIDW:2019103491
208	P	CN107681655-A; CN107681655-B	Tidal energy generating farm planning method, involves calculating tidal energy output power according to actual flow rate of generator, and obtaining ramp rate of thermal power generating unit by utilizing quadratic programming process.	REN Z	UNIV CHONGQING (UYCQ-C)	201814322J	NOVELTY - The method involves obtaining tidal flow speed measured data. Greenhouse gas emission coefficient value is calculated by a power generation unit. Tide flow rate average value of each period is calculated according to the tidal flow speed measured data. Tidal energy output power is calculated according to actual flow rate of a generator. Daily capacity of the tidal energy is calculated t…	T01 (Digital Computers); X12 (Power Distribution/Components/Converters); X15 (Non-Fossil Fuel Power Generating Systems)	T01-J04A; X12-H01B; X15-C02	H02J-003/00; H02J-003/38	CN107681655-A 09 Feb 2018 H02J-003/00 201817 Pages: 23 Chinese	CN107681655-A CN10806324 08 Sep 2017	CN10806324 08 Sep 2017	DIIDW:201814322J
209	P	CN108678896-A; CN208619263-U	Vertical shaft tide energy turbine multi-layer pile supporting structure, has pile foundation provided with horizontal support arm, where extending end of horizontal supporting arm is fixed with vertical shaft tidal-energy water turbine.	WU X	UNIV SHANGHAI JIAOTONG (USJT-C)	2018842215	NOVELTY - The structure has a pile foundation (1) provided with a horizontal support arm (2) through an external connecting piece. An end of the horizontal supporting arm is extended along an outward direction to form an extending end. The extending end of the horizontal supporting arm is fixed with a vertical shaft tidal-energy water turbine (3). The horizontal support arm is provided with an en…	Q54 (Non-positive displacement fluid engines (i.e. driven by fluid); Miscellaneous motors and machines for producing mechanical power/thrust (F03B,D,G,H)); X15 (Non-Fossil Fuel Power Generating Systems)	Q54-X; X15-C02	F03B-011/00; F03B-013/26	CN108678896-A 19 Oct 2018 F03B-013/26 201875 Pages: 6 Chinese	CN108678896-A CN10801038 20 Jul 2018	CN10801038 20 Jul 2018	DIIDW:2018842215
210	P	CN106204339-A; CN106204339-B	Electric field power system tidal energy generation reliability evaluating method, involves performing convergence determination process, and obtaining tidal energy power generation reliability index of electric field power system.	REN Z	UNIV CHONGQING (UYCQ-C)	2016781727	NOVELTY - The method involves obtaining tide flow rate of actual measurement data samples by using formula. Energy coefficient, thrust coefficient and a blade sweep area are obtained. ITER convergence criteria and total output power of a tidal energy power generation field are calculated. Tidal energy generating tidal flow speed of machine sets in the tidal energy power generation field and desir…	T01 (Digital Computers); X15 (Non-Fossil Fuel Power Generating Systems)	T01-J05A2A; X15-C02	G06Q-050/06; G06F-017/50	CN106204339-A 07 Dec 2016 G06Q-050/06 201703 Pages: 19 Chinese	CN106204339-A CN10647755 09 Aug 2016	CN10647755 09 Aug 2016	DIIDW:2016781727
211	P	CN116559059-A	Method for detecting erosion of chloride ions on water dike of tidal energy reservoir, involves acquiring concrete structure information of tidal energy reservoir dike to be measured, and seawater environment information of position of tidal energy reservoir dike to be measured.	WU S	CHINA THREE GORGES CORP (CTGC-C)	2023858555	NOVELTY - The method involves acquiring concrete structure information of a tidal energy reservoir dike to be measured, and seawater environment information of the position of the tidal energy reservoir dike to be measured and the tidal cycle of the sea area. A chloride ion erosion process simulation model of the tidal energy reservoir dike to be detected is constructed according to the concrete …	E36 (Non-metallic elements, semi-metals (Se, Te, B, Si) and their compounds (except for E35).); S03 (Scientific Instrumentation); T01 (Digital Computers)	E11-Q03; E31-B03B; S03-F07; T01-J04E; T01-J05A1; T01-J05A2C	G01N-017/00	CN116559059-A 08 Aug 2023 G01N-017/00 202370 Chinese	CN116559059-A CN10538790 12 May 2023	CN10538790 12 May 2023	DIIDW:2023858555
212	P	CN109740975-A; CN109740975-B	Tide resource estimation and flowing direction based tidal energy power generation field planning method, involves detecting maximum carrying capacity of medium voltage cable, and performing energy power generation field planning function.	REN Z	UNIV CHONGQING (UYCQ-C)	2019450216	NOVELTY - The method involves obtaining an input parameter by a collecting system. Different direction and different amplitude of flow rate occurrence probability are detected based on the input parameter. Preset number of tidal energy generating electric field in NTCT is determined. A tidal energy generating field priority planning model is established. An initial position of a tidal flow energy…	Q54 (Non-positive displacement fluid engines (i.e. driven by fluid); Miscellaneous motors and machines for producing mechanical power/thrust (F03B,D,G,H)); T01 (Digital Computers); X11 (Power Generation and High Power Machines); X15 (Non-Fossil Fuel Power Generating Systems)	Q54-X; T01-J05A2C; X11-B; X15-C01B2; X15-C02	F03B-013/26; G06Q-010/06; G06Q-050/06	CN109740975-A 10 May 2019 G06Q-010/06 201952 Pages: 35 Chinese	CN109740975-A CN10178893 11 Mar 2019	CN10178893 11 Mar 2019	DIIDW:2019450216
213	P	CN114679070-A; CN114679070-B	Tidal energy control system, has variable step length frequency self-adaptive filtering controller and maximum power tracking controller for reducing fluctuation of output power of tidal energy generating device.	WANG W	SHENZHEN JINGQUANHUA TECHNOLOGY CO LTD (SHEN-Non-standard)	202289072F	NOVELTY - The system comprises a tidal energy generating device, a hardware circuit topology and a control module. The topology of the hardware circuit includes an uncontrolled rectifier circuit and a Boost converter circuit. The Boost converter is connected in parallel with a hybrid semiconductor parallel device. The control module includes a variable step length frequency self-adaptive filterin…	U24 (Amplifiers and Low Power Supplies); X12 (Power Distribution/Components/Converters); X15 (Non-Fossil Fuel Power Generating Systems)	U24-E02B; U24-D04; U24-D02A; U24-D01E1; U24-D01A; X12-J04; X12-J02A; X12-J01E1; X12-J01A; X15-C03; X15-C02	G05F-001/56; H02M-001/08; H02M-001/14; H02M-003/06; H02M-007/217	CN114679070-A 28 Jun 2022 H02M-007/217 202261 Chinese	CN114679070-A CN10382382 13 Apr 2022	CN10382382 13 Apr 2022	DIIDW:202289072F
214	P	CN104165116-A; CN104165116-B	Tide energy generating device has transmission unit and swing arm that are hinged with transmission unit, and flywheel that is provided in transmission unit.	LU J	UNIV SHANDONG (USHA-C)	2015060925	NOVELTY - The tide energy generating device has an energy absorbing unit, transmission unit and power unit including a suspension unit (2). The energy absorbing unit is provided with a wing plate hinged with a swing arm (4). A transmission unit and the swing arm are hinged with a transmission unit. A flywheel is provided in the transmission unit. A hinged shaft is provided in the generating unit.	Q54 (Non-positive displacement fluid engines (i.e. driven by fluid); Miscellaneous motors and machines for producing mechanical power/thrust (F03B,D,G,H)); X15 (Non-Fossil Fuel Power Generating Systems)	X15-C02	F03B-013/26	CN104165116-A 26 Nov 2014 F03B-013/26 201507 Pages: 10 Chinese	CN104165116-A CN10181642 16 May 2013	CN10181642 16 May 2013	DIIDW:2015060925
215	P	CN118148825-A	Submerged tidal current energy power generation device arranged in array, has horizontal shaft tidal energy water turbine that is provided with two groups, and horizontal shaft tidal energy water turbine whose two groups are symmetrically set on two sides of shuttle-shaped floating portion.	LIU Z	UNIV HARBIN ENGINEERING (UHEG-C)	2024622912	NOVELTY - The device has submerged tidal current energy power generation mechanisms whose four groups are arranged in a rhombic structure. A hinge component is set between adjacent submerged tidal current energy power generation mechanism. The hinge assembly is respectively hinged with the adjacent submersible tidal energy generating mechanism. The elastic mooring system (1) is provided with two …	Q54 (Non-positive displacement fluid engines (i.e. driven by fluid); Miscellaneous motors and machines for producing mechanical power/thrust (F03B,D,G,H)); X15 (Non-Fossil Fuel Power Generating Systems); X11 (Power Generation and High Power Machines)	Q54-A05; Q54-X; X15-C01; X15-C02; X11-B01; X11-J05	F03B-011/00; F03B-011/02; F03B-013/20; F03B-013/26; F03B-003/12	CN118148825-A 07 Jun 2024 F03B-013/20 202451 Chinese	CN118148825-A CN10290898 14 Mar 2024	CN10290898 14 Mar 2024	DIIDW:2024622912
216	P	CN110481726-A; CN210761204-U	Vertical combined multi-energy obtaining floating tidal power platform, has swinging plate connected with truss structure, sub-floating cabin whose side is fixed with wall of bottom cabin, and mooring point connected to mooring system.	WU X	UNIV SHANGHAI JIAOTONG (USJT-C)	2019A0445H	NOVELTY - The platform has a top cylinder-type floating cabin (1) provided with multiple cabins (11), a variable ballast tanks (13) and a storage cabin (12) that are arranged in vertical direction. A tide energy turbine carrying platform (2) and a sub-tide energy turbine carrying platform (4) are provided with multiple tidal-energy water turbines (14), multiple lateral supporting columns (15), an…	Q24 (Ships; waterborne vessels; related equipment (B63)); Q54 (Non-positive displacement fluid engines (i.e. driven by fluid); Miscellaneous motors and machines for producing mechanical power/thrust (F03B,D,G,H)); X15 (Non-Fossil Fuel Power Generating Systems)	Q24-B09E1; Q24-B09E3; Q24-C02; Q24-P08; Q54-X; X15-C02	B63B-021/50; B63B-035/44; B63B-043/04; B63B-043/12; F03B-013/26	CN110481726-A 22 Nov 2019 B63B-035/44 201993 Pages: 8 Chinese	CN110481726-A CN10841510 06 Sep 2019	CN10841510 06 Sep 2019	DIIDW:2019A0445H
217	P	CN106226044-A; CN106226044-B	Tidal energy capturing paddle performance evaluating method, involves dividing tidal flow rate-time curve into multiple flow speed intervals, capturing tide energy by paddle, and determining total energy value by paddle.	CHEN J	UNIV ZHEJIANG NINGBO TECHNOLOGY INST (NBLG-C)	2016801601	NOVELTY - The method involves arranging a tide flow speed pattern. An appointed sea tide flow rate sample curve is obtained. A settling time curve is obtained according to sea tide flow speed. A tidal flow rate-time curve is divided into multiple flow speed intervals. A curve section is occupied by time value in flow speed interval according to tide flow rate size value difference. A power value …	S02 (Engineering Instrumentation)	S02-J03; S02-J07	G01M-010/00; G01M-013/00	CN106226044-A 14 Dec 2016 G01M-013/00 201704 Pages: 5 Chinese	CN106226044-A CN10540737 06 Jul 2016	CN10540737 06 Jul 2016	DIIDW:2016801601
218	P	CN103953496-A; CN103953496-B	Tide energy capturing mechanism for tide energy generating device, has turning blade provided with limiting pole and movable sleeve, and main panel forming angle of specific degrees, where movable sleeve is sleeved on support rod.	YU C	YU C (YUCC-Individual)	2014S93794	NOVELTY - The mechanism has a rotary wheel connected with a main shaft through a key. A turning blade is connected with an inner part of the support rod. The support rod is arranged on a periphery of the rotating wheel along axial direction. The turning blade is provided with a limiting pole and a movable sleeve. Angle of a main panel is 90 degrees. The movable sleeve is sleeved on the support ro…	Q54 (Non-positive displacement fluid engines (i.e. driven by fluid); Miscellaneous motors and machines for producing mechanical power/thrust (F03B,D,G,H)); X15 (Non-Fossil Fuel Power Generating Systems)	X15-C02	F03B-013/26	CN103953496-A 30 Jul 2014 F03B-013/26 201468 Pages: 16 Chinese	CN103953496-A CN10206380 15 May 2014	CN10206380 15 May 2014	DIIDW:2014S93794
219	P	CN109026515-A; CN109026515-B	Tidal power generating device, has tidal energy conversion mechanism and mechanical energy conversion mechanism fixed at inner side of shell mechanism, and driving screw provided with driving shaft and reverse screw.	WANG S	WANG S (WANG-Individual)	2018A5043K	NOVELTY - The device has a tidal energy conversion mechanism (2) fixed at an inner side of a shell mechanism (1). A mechanical energy conversion mechanism (3) is fixed at the inner side of the shell mechanism. A driving screw is provided with a driving shaft, a positive screw and a reverse screw. The positive screw is welded with the driving shaft. The reverse screw is welded with the driving sha…	Q54 (Non-positive displacement fluid engines (i.e. driven by fluid); Miscellaneous motors and machines for producing mechanical power/thrust (F03B,D,G,H)); X15 (Non-Fossil Fuel Power Generating Systems)	Q54-X; X15-C02	F03B-013/26	CN109026515-A 18 Dec 2018 F03B-013/26 201910 Pages: 16 Chinese	CN109026515-A CN11216062 18 Oct 2018	CN11216062 18 Oct 2018	DIIDW:2018A5043K
220	P	CN106208046-A; CN106208046-B	Tidal energy power generation field set layout method, involves obtaining layout proposal generator number, and performing tidal energy power generation field set layout when iteration time satisfies iteration ending condition.	REN Z	UNIV CHONGQING (UYCQ-C)	2016791625	NOVELTY - The method involves determining an energy obtaining coefficient and a thrust coefficient. Grid transverse distance and longitudinal distance are calculated. Environment cost and an annual interest rate are determined. Sequence number of a thermal power generating unit is obtained. A mean tide flow rate and a period tide flow rate average value are determined. A binary character matrix i…	T01 (Digital Computers); U24 (Amplifiers and Low Power Supplies); X12 (Power Distribution/Components/Converters); X15 (Non-Fossil Fuel Power Generating Systems)	T01-J05A1; T01-J05A2A; T01-J15A2; U24-H; X12-H01; X15-C02; X15-C03	G06F-017/50; G06Q-050/06; H02J-003/00	CN106208046-A 07 Dec 2016 H02J-003/00 201703 Pages: 17 Chinese	CN106208046-A CN10647754 09 Aug 2016	CN10647754 09 Aug 2016	DIIDW:2016791625
221	P	CN118148826-A	Submersible tidal energy power generation device, has buoy assembly fixedly connected on top part of shuttle-shaped floating body, and two groups of horizontal shaft tidal energy water turbine symmetrically fixed on two sides of shuttle-shaped floating body.	LIU Z	UNIV HARBIN ENGINEERING (UHEG-C)	202462204B	NOVELTY - The device has an elastic mooring system (1) provided with two groups, where two groups of the elastic mooring system are fixed on front and rear ends of a shuttle-shaped floating body (4), respectively. A buoy assembly (2) is fixedly connected on a top part of the shuttle-shaped floating body. A horizontal shaft tidal energy water turbine (3) is provided with two groups, where the two …	Q54 (Non-positive displacement fluid engines (i.e. driven by fluid); Miscellaneous motors and machines for producing mechanical power/thrust (F03B,D,G,H)); Q24 (Ships; waterborne vessels; related equipment (B63)); X15 (Non-Fossil Fuel Power Generating Systems); X11 (Power Generation and High Power Machines)	Q54-X; Q24-C02; Q24-P08; X15-C02; X11-B01	B63B-021/50; B63B-035/44; F03B-013/10; F03B-013/26	CN118148826-A 07 Jun 2024 F03B-013/26 202451 Chinese	CN118148826-A CN10271493 11 Mar 2024	CN10271493 11 Mar 2024	DIIDW:202462204B
222	P	WO2016185210-A1; GB2539638-A; GB2539638-B	Tidal energy system for generating electrical energy from tidal movement of sea water, has seaward storage basin that is arranged with landward storage basin, where turbine provides between storage basin and landward storage basin.	MURPHY S F	MURPHY S F (MURP-Individual)	201672405S	NOVELTY - The tidal energy system (1) comprises a seaward storage basin (10) that is arranged with a landward storage basin (30). An intermediate storage basin (20) is provided between the seaward and landward storage basins. The seaward storage basin is provided to receive and store the incoming tidal water. The intermediate storage basin receives and stores the outgoing tidal water. The turbine…	Q42 (Hydraulic engineering, soil shifting and sewerage (E02, 3)); Q54 (Non-positive displacement fluid engines (i.e. driven by fluid); Miscellaneous motors and machines for producing mechanical power/thrust (F03B,D,G,H)); X15 (Non-Fossil Fuel Power Generating Systems)	Q42-A03; Q54-X; X15-C02	E02B-009/08; F03B-013/06; F03B-013/08; F03B-013/26	WO2016185210-A1 24 Nov 2016 F03B-013/06 201678 Pages: 33 English	WO2016185210-A1 WOGB051437 18 May 2016	GB008509 18 May 2015	DIIDW:201672405S
223	P	CN106364629-A	Tidal energy turbine integrated water power generating marine buoy, has tide energy turbine generator electrically connected with electric chamber, where electric chamber is fixed with energy storage unit and power supply.	WANG Q	UNIV JIANGSU SCI & TECHNOLOGY (UYJG-C)	2017103409	NOVELTY - The marine buoy has a buoy main body fixed on a bracket platform. An electric chamber is fixed with the bracket platform that is connected with a bracket. A tide energy turbine generator i.e. horizontal shaft tide energy turbine generator, is covered with a flow guide cover. The flow guide cover is connected with the buoy main body. The tide energy turbine generator is electrically conn…	Q54 (Non-positive displacement fluid engines (i.e. driven by fluid); Miscellaneous motors and machines for producing mechanical power/thrust (F03B,D,G,H)); W06 (Aviation, Marine and Radar Systems); X15 (Non-Fossil Fuel Power Generating Systems)	Q54-A05; W06-C07C; X15-C02	B63B-022/16; F03B-013/26; F03B-003/16	CN106364629-A 01 Feb 2017 B63B-022/16 201715 Pages: 6 Chinese	CN106364629-A CN10826400 14 Sep 2016	CN10826400 14 Sep 2016	DIIDW:2017103409
224	P	MX2013002515-A1	System for extracting tidal energy from waves, comprises multiple rotating steel cylinders, which are mounted on the shore and hydraulic pump that is provided with a generator to generate electricity from tidal energy.	ANGELES A Z	ANGELES A Z (ANGE-Individual)	2014R59458	NOVELTY - The system comprises multiple rotating steel cylinders, which are mounted on the shore. A hydraulic pump is provided with a generator to generate electricity from tidal energy.	Q54 (Non-positive displacement fluid engines (i.e. driven by fluid); Miscellaneous motors and machines for producing mechanical power/thrust (F03B,D,G,H)); X15 (Non-Fossil Fuel Power Generating Systems)	X15-C01C; X15-C02	F03B-013/16	MX2013002515-A1 31 Aug 2014 F03B-013/16 201474 Pages: 1 Spanish	MX2013002515-A1 MX002515 25 Feb 2013	MX002515 25 Feb 2013	DIIDW:2014R59458
225	P	CN114960572-A	Tidal energy power station for generating electricity, includes reservoir located near the coastline close to or located on a dyke in an ocean area.	ZHANG X	ZHANG X (ZHAN-Individual)	2022B5037W	NOVELTY - The tidal energy power station includes reservoir (1) located near the coastline (2) close to or located on a dyke (3) in an ocean area. A first water flow channel and a second water flow channel are provided. The dam at the second water flow channel is provided with a water turbine generator (7) and a water turbine generator gate (8) that controls the on-off of the second water flow ch…	Q42 (Hydraulic engineering, soil shifting and sewerage (E02, 3)); Q54 (Non-positive displacement fluid engines (i.e. driven by fluid); Miscellaneous motors and machines for producing mechanical power/thrust (F03B,D,G,H)); X11 (Power Generation and High Power Machines); X15 (Non-Fossil Fuel Power Generating Systems)	Q42-A03; Q42-A02B; Q42-A02A; Q54-X; X11-B; X15-C02A2	E02B-001/00; E02B-007/20; E02B-007/52; E02B-007/54; E02B-009/02; E02B-009/08; F03B-013/26	CN114960572-A 30 Aug 2022 E02B-009/08 202274 Chinese	CN114960572-A CN10487227 06 May 2022	CN10487227 06 May 2022	DIIDW:2022B5037W
226	P	CN210734455-U	Tidal energy based navigation displaying system, has tower provided with tide energy generating structure that is provided with fixing frame, and electric energy storage unit mounted in box body for supplying power to navigation indication structure.	LI Y	UNIV ZHEJIANG OCEAN (UYZO-C)	202055284W	NOVELTY - The utility model claims a navigation displaying system using tidal energy, comprising a pile, tower and an indicator lamp; the pile is buried in the seabed rock navigation mark set position, the tower board is set on the pile. said indication lamp is mounted on the turret, the turret is installed with navigation indication structure, the tower lower part provided with a tide energy gen…	Q54 (Non-positive displacement fluid engines (i.e. driven by fluid); Miscellaneous motors and machines for producing mechanical power/thrust (F03B,D,G,H)); X15 (Non-Fossil Fuel Power Generating Systems)	Q54-X; X15-C02	B63B-051/00; B63B-051/02; F03B-013/26	CN210734455-U 12 Jun 2020 B63B-051/02 202051 Pages: 10 Chinese	CN210734455-U CN21698202 11 Oct 2019	CN21698202 11 Oct 2019	DIIDW:202055284W
227	P	CN109931206-A	Tidal energy generating electricity utilizing device, has tensioning mechanism connected with side of tide energy converting mechanism, and magnetic line cutter device and tide energy converting mechanism connected with magnet mechanism.	LI S	LI S (LISS-Individual)	201959003S	NOVELTY - The device has a moving parking wheel mechanism (1) provided with a parking mechanism and an adjustable damping wheel mechanism. The parking mechanism is connected with two sides of the adjustable damping wheel mechanism. The parking mechanism is provided with a parking support and a parking bolt and formed with a parking thread hole. A tensioning mechanism (4) is connected with an inne…	Q54 (Non-positive displacement fluid engines (i.e. driven by fluid); Miscellaneous motors and machines for producing mechanical power/thrust (F03B,D,G,H)); Q63 (Couplings; clutches; brakes; springs; dampers (F16D,F)); Q64 (Belts, chains, gearing (F16G,H)); X15 (Non-Fossil Fuel Power Generating Systems)	Q54-X; Q63-E02D; Q64-C01; X15-C02	B60T-001/04; F03B-013/26; F16F-015/04; F16H-007/12	CN109931206-A 25 Jun 2019 F03B-013/26 201961 Pages: 23 Chinese	CN109931206-A CN10265205 03 Apr 2019	CN10265205 03 Apr 2019	DIIDW:201959003S
228	P	CN110513232-A; CN210637180-U; CN110513232-B	Tide energy turbine directional shift single-pile supporting base, has pile base used for sliding along horizontal annular slide way, and supporting arm fixed on side walls of pile base and connected to multiple tidal- energy water turbines.	WU X	UNIV SHANGHAI JIAOTONG (USJT-C)	2019A14259	NOVELTY - The base has a pile base (1) whose side wall provided with multiple surrounding pile walls. The pile wall vertical to a pile shaft (3) of a horizontal annular slide way (2) is connected with multiple vertical slide ways parallel to the pile shaft. The horizontal annular slide way and the vertical slide way, the pile base are arranged with multiple supporting arm (4). A side wall of the …	Q42 (Hydraulic engineering, soil shifting and sewerage (E02, 3)); Q54 (Non-positive displacement fluid engines (i.e. driven by fluid); Miscellaneous motors and machines for producing mechanical power/thrust (F03B,D,G,H)); X15 (Non-Fossil Fuel Power Generating Systems)	Q42-A10; Q54-X; X15-C02	E02D-027/12; E02D-027/44; E02D-027/52; F03B-011/00; F03B-013/26	CN110513232-A 29 Nov 2019 F03B-011/00 201995 Pages: 7 Chinese	CN110513232-A CN10841823 06 Sep 2019	CN10841823 06 Sep 2019	DIIDW:2019A14259
229	P	CN105305488-A; CN105305488-B	Tide energy network transmission rate evaluating method, involves performing energy distribution process of circuit, and determining energy transmission rate index value according to network transmission rate.	HAN F	STATE GRID CORP CHINA (SGCC-C)	201610344X	NOVELTY - The method involves obtaining illumination randomness information of a photovoltaic force outer probability model. A wind speed power outlet force probability model is established. A probability distribution load model is established according to a generator outage probability model. Monte-carlo processing operation is performed based on tide probability. Energy distribution process of …	U24 (Amplifiers and Low Power Supplies); X12 (Power Distribution/Components/Converters)	U24-H; X12-H01B	H02J-003/38	CN105305488-A 03 Feb 2016 H02J-003/38 201616 Pages: 16 English	CN105305488-A CN10691370 22 Oct 2015	CN10657319 13 Oct 2015	DIIDW:201610344X
230	P	CN109812379-A; CN109812379-B	Tidal energy set power controlling method, involves maintaining energy of tidal energy generator at bearing range when stall reaches nominal power, and stopping torque controlling process when current flow speed reaches warning flow speed.	ZHANG D	UNIV ZHEJIANG (UYZH-C)	201948753R	NOVELTY - The method involves controlling power output by using a maximum power control algorithm before tidal energy generating power reaches rated power for maximizing using tidal energy. The tidal energy of a tidal energy generator set is deviated from a maximum power output curve through performing a stall torque controlling process to reduce generate power tide flow speed of the tidal power …	Q54 (Non-positive displacement fluid engines (i.e. driven by fluid); Miscellaneous motors and machines for producing mechanical power/thrust (F03B,D,G,H)); X15 (Non-Fossil Fuel Power Generating Systems)	Q54-X; X15-C02; X15-C03	F03B-013/26; F03B-015/00	CN109812379-A 28 May 2019 F03B-015/00 201957 Pages: 6 Chinese	CN109812379-A CN10285245 10 Apr 2019	CN10285245 10 Apr 2019	DIIDW:201948753R
231	P	CN220414301-U	Tide energy pile foundation structure for use in tide energy platform system, has straight line section and turning section arranged in tower cylinder, and submarine cable inlet section exposed out of tower cylinder.	LIAO J	SHANGHAI INVESTIGATION DESIGN & RES INST (CTGC-C)	202415041A	NOVELTY - The invention claims a tide energy pile foundation structure and tide energy platform system, belonging to the technical field of ocean energy equipment. the pile foundation structure comprises a tower cylinder and at least one J-shaped pipe; the J-shaped pipe comprises a straight line section, a turning section and a submarine cable inlet section. the straight line section and the turn…	Q54 (Non-positive displacement fluid engines (i.e. driven by fluid); Miscellaneous motors and machines for producing mechanical power/thrust (F03B,D,G,H)); Q42 (Hydraulic engineering, soil shifting and sewerage (E02, 3)); X15 (Non-Fossil Fuel Power Generating Systems)	Q54-X; Q42-A10; X15-C01	E02D-027/12; E02D-027/42; E02D-027/44; E02D-027/52; F03B-013/14	CN220414301-U 30 Jan 2024 E02D-027/12 202413 Chinese	CN220414301-U CN21719267 03 Jul 2023	CN21719267 03 Jul 2023	DIIDW:202415041A
232	P	CN203238654-U	Self-lifting-type tide energy generating base frame for offshore tide energy power generation industry, has steel pipe pile provided with pile leg, and windlass connected with flow generate composite structure through lifting rope.	LUO J	HYDROCHINA HUADONG ENG CORP (CNPW-C)	2014A15379	NOVELTY - The utility model relates to a self-lifting type tide energy generating base structure. This utility model aims to provide a kind of simple structure, convenient construction of self-lifting type tide energy generating base frame, aiming at reducing the maintenance cost, improving the construction environment, it is convenient for the subsequent maintenance and repair. The technical sol…	Q42 (Hydraulic engineering, soil shifting and sewerage (E02, 3)); X15 (Non-Fossil Fuel Power Generating Systems)	X15-C01B2; X15-C02	E02B-017/02; E02B-009/08; E02D-027/42; E02D-027/44	CN203238654-U 16 Oct 2013 E02D-027/42 201402 Pages: 6 Chinese	CN203238654-U CN20147153 28 Mar 2013	CN20147153 28 Mar 2013	DIIDW:2014A15379
233	P	KR2009128015-A	Tidal energy electric power system, comprises piston, spring, air turbine, air outlet, air pump and large sized rubber tube which is connected to air pump through perpendicular cable, where large sized rubber tube is provided in sea area.	JUNG IL P	JUNG I P (JUNG-Individual)	2009S69173	NOVELTY - The tidal energy electric power system comprises a piston (310), a spring (340), an air turbine (400), an air outlet (410), an air pump (300) and a large sized rubber tube (100) which is connected to the air pump through a perpendicular cable. The large sized rubber tube is provided in a sea area, where the tidal energy is produced. A perpendicular pile (200) is fixed to the bottom of t…	A88 (Mechanical engineering and tools e.g. valves, gears and conveyor belts.); Q54 (Non-positive displacement fluid engines (i.e. driven by fluid); Miscellaneous motors and machines for producing mechanical power/thrust (F03B,D,G,H)); X11 (Power Generation and High Power Machines); X15 (Non-Fossil Fuel Power Generating Systems)	A12-H; X11-B01; X15-C01; X15-C02	F03B-013/16; F03B-013/18	KR2009128015-A 15 Dec 2009 F03B-013/16 201002 Pages: 8	KR2009128015-A KR053986 10 Jun 2008	KR053986 10 Jun 2008	DIIDW:2009S69173
234	P	CN210769130-U	Tidal energy generating electricity device, has mounting frame provided with turntable, and water wheel whose output shaft is connected with generating set, where mounting seat is provided with level gauge that is fixed on tail wing.	WANG W	UNIV ZHEJIANG OCEAN (UYZO-C)	202056781D	NOVELTY - The utility model claims a tidal energy generate electricity device, belonging to the technical field of new energy utilization. It solves the problem that the existing tidal energy generate electricity device utilization rate is low and so on. The tidal energy generating device comprises a mounting frame and generate electricity unit, mounting pedestal is provided with a turntable, the…	Q54 (Non-positive displacement fluid engines (i.e. driven by fluid); Miscellaneous motors and machines for producing mechanical power/thrust (F03B,D,G,H)); X15 (Non-Fossil Fuel Power Generating Systems)	Q54-X; X15-C02	F03B-011/00; F03B-013/26	CN210769130-U 16 Jun 2020 F03B-013/26 202052 Pages: 7 Chinese	CN210769130-U CN20630045 05 May 2019	CN20630045 05 May 2019	DIIDW:202056781D
235	P	CN111706456-A; CN212615152-U	Complementary ocean multi-energy generating device, has mounting platform fixedly provided with fan, swing-type generating device and tide energy generating device, where tide energy generating device is provided with water collecting cover.	WANG S	UNIV SHANGHAI OCEAN (USHO-C)	202096785Q	NOVELTY - The device has a mounting platform (1) fixedly provided with a fan (2), a swing-type generating device (3) and a tide energy generating device (4). The swing-type generating device and the tide energy generating device are respectively connected with a power storage device (8) through a mounting rod (9). The tide energy generating device is provided with a water collecting cover. Upper …	Q54 (Non-positive displacement fluid engines (i.e. driven by fluid); Miscellaneous motors and machines for producing mechanical power/thrust (F03B,D,G,H)); X15 (Non-Fossil Fuel Power Generating Systems)	Q54-G; Q54-X; X15-B01; X15-C01; X15-C02	F03B-013/18; F03B-013/26; F03D-013/25; F03D-009/00; F03D-009/11	CN111706456-A 25 Sep 2020 F03B-013/18 202083 Pages: 9 Chinese	CN111706456-A CN10685725 16 Jul 2020	CN10685725 16 Jul 2020	DIIDW:202096785Q
236	P	CN220434924-U	Tide energy generator set, has generating device for controlling impeller device corresponding to tide direction to loosen brake when seawater rises or falls, where impeller drives generator to operate electric energy generated by generator.	WEI L	THREE GORGES NEW ENERGY OFFSHORE WIND (THRE-Non-standard)	202416106N	NOVELTY - The utility model relates to the technical field of tidal energy power generation, and discloses a tidal energy generator set, which is fixed under the sea surface through a mounting platform, the tidal energy generator set comprises: two impeller devices, two generators and a generating device, wherein the input end of the generating device is connected with each generator, and the out…	Q54 (Non-positive displacement fluid engines (i.e. driven by fluid); Miscellaneous motors and machines for producing mechanical power/thrust (F03B,D,G,H)); X15 (Non-Fossil Fuel Power Generating Systems); X11 (Power Generation and High Power Machines)	Q54-X; X15-C02; X15-C03; X11-B10; X11-J05	F03B-013/26; F03B-015/00	CN220434924-U 02 Feb 2024 F03B-013/26 202415 Chinese	CN220434924-U CN22286180 23 Aug 2023	CN22286180 23 Aug 2023	DIIDW:202416106N
237	P	CN208441957-U	Tidal energy based expandable power generation device, has generator provided with rotating shaft that is symmetrically fixed with multiple rotors, where rotating shaft is rotatably fixed on guide tube.	CHEN H	GUANGDONG POWER GRID CO LTD (CSPG-C)	2019144101	NOVELTY - A dilated tidal energy generating device, comprising a guide Tidewater of a guide pipe, the guide pipe is provided with a generator and pair rotating wheel of the generator end, said pair of rotating wheel is used for driving the rotor to rotate the generator. This utility model claims dilated tidal energy generating device can realize high efficiency of tidal power generation with high…	Q54 (Non-positive displacement fluid engines (i.e. driven by fluid); Miscellaneous motors and machines for producing mechanical power/thrust (F03B,D,G,H)); V06 (Electromechanical Transducers and Small Machines); X11 (Power Generation and High Power Machines); X15 (Non-Fossil Fuel Power Generating Systems)	Q54-X; V06-M07A; V06-M07B; V06-M10; X11-B01; X11-J01A; X11-J01B; X11-J05B; X15-C02	F03B-011/00; F03B-013/26; H02K-001/12; H02K-001/27; H02K-007/18	CN208441957-U 29 Jan 2019 F03B-013/26 201916 Pages: 11 Chinese	CN208441957-U CN20608153 25 Apr 2018	CN20608153 25 Apr 2018	DIIDW:2019144101
238	P	CN102747717-A	Device useful for generating electricity from tidal energy and desalinating sea water using electricity, contains tidal energy sea dam, U-shaped louver-type water inlet valve dam, piston vessel, movable piston and pool cylinder sleeve.	MENG L	MENG L (MENG-Individual)	2013B19380	NOVELTY - Device comprises tidal energy dam (2) blocking sea water, U-shaped louver-type water inlet valve dam (3), U-shaped louver-type water drain valve dam, piston vessel (7), movable piston (6), pool cylinder sleeve (12), pool cylinder sleeve water inlet valve (11), drain passage (13), high pressure water inlet valve (14), high pressure water inlet passage (15) and high pressure water conserv…	D15 (Chemical or biological treatment of water, industrial waste and sewage - including purification, sterilising or testing water, scale prevention, treatment of sewage sludge, regeneration of active carbon which has been used for water treatment and impregnating water with gas e.g. CO2, but excluding plant and anti-pollution devices (C02).); Q42 (Hydraulic engineering, soil shifting and sewerag…	D04-A01; D04-B07F; X15-C02	C02F-001/00; C02F-103/08; E02B-009/02; E02B-009/08; F03B-013/26	CN102747717-A 24 Oct 2012 E02B-009/08 201315 Pages: 6 Chinese	CN102747717-A CN10101513 22 Apr 2011	CN10101513 22 Apr 2011	DIIDW:2013B19380
239	P	CN114542354-A; CN217152166-U	Hydraulic axis tidal energy water turbine for tide energy power generating device, has rotating shaft rotatably fixed in shell through bearing, and blades arranged on connecting piece, where end of rotating shaft is fixedly connected with semi-spherical-shaped connecting piece.	CHEN C	JIANGSU LUOYUN WATER CONSERVANCY ENG (JIAN-Non-standard)	202275333T	NOVELTY - The turbine has a rotating shaft rotatably fixed in a shell through a bearing. An end of the rotating shaft is fixedly connected with a semi-spherical-shaped connecting piece. Multiple blades are arranged on the connecting piece, where each blade is formed as a bionic eagle wing type structure, width of each blade is narrowed from narrow to width along length direction, and thickness of…	Q54 (Non-positive displacement fluid engines (i.e. driven by fluid); Miscellaneous motors and machines for producing mechanical power/thrust (F03B,D,G,H)); X15 (Non-Fossil Fuel Power Generating Systems)	Q54-A05; X15-C02	F03B-003/04; F03B-003/12	CN114542354-A 27 May 2022 F03B-003/04 202254 Chinese	CN114542354-A CN10370499 10 Apr 2022	CN10370499 10 Apr 2022	DIIDW:202275333T
240	P	CN107829873-A	Double-rotating wheel-based tide energy turbine used e.g. for turbines for generating electricity from ocean currents, comprises flow guiding cover, rotating shaft, hub, blades and linkage spiral helical blade.	ZHENG Y	UNIV HOHAI (UYHO-C)	201824296V	NOVELTY - A double-rotating wheel-based tide energy turbine comprises flow guiding cover (1), rotating shaft (2), hub (3), blades (4) and linkage spiral helical blade (7). The hub and blades are set in guiding cover. The linkage spiral helical blade is gradually stretched along the axial direction of rotating shaft.	Q54 (Non-positive displacement fluid engines (i.e. driven by fluid); Miscellaneous motors and machines for producing mechanical power/thrust (F03B,D,G,H)); X15 (Non-Fossil Fuel Power Generating Systems)	Q54-A05; Q54-X; X15-C02	F03B-013/26; F03B-003/12; F03B-003/18	CN107829873-A 23 Mar 2018 F03B-013/26 201826 Pages: 13 Chinese	CN107829873-A CN10880362 26 Sep 2017	CN10880362 26 Sep 2017	DIIDW:201824296V
241	P	CN203067169-U	Tide energy generating device, has storage battery electrically connected with electric generator through coupler, and rotating shaft connected with water wheel that is provided with flow guide plate.	REN Y	UNIV ZHEJIANG OCEAN (UYZO-C)	2013T39077	NOVELTY - This utility model claims a kind of simple tide energy generating device, belonging to the technical field of new energy, comprising a fixed bracket, the fixed bracket is provided with a generator, a storage battery, a generator is electrically connected with the storage battery, motor through the coupler and the rotating shaft is connected with the wheel, the periphery is provided with…	Q54 (Non-positive displacement fluid engines (i.e. driven by fluid); Miscellaneous motors and machines for producing mechanical power/thrust (F03B,D,G,H)); X15 (Non-Fossil Fuel Power Generating Systems); X16 (Electrochemical Storage)	X15-C02; X16-B01; X16-G02C	F03B-013/26; F03B-003/12; F03B-003/18; H02J-007/32	CN203067169-U 17 Jul 2013 F03B-013/26 201372 Pages: 6 Chinese	CN203067169-U CN20719116 23 Dec 2012	CN20719116 23 Dec 2012	DIIDW:2013T39077
242	P	CA2644792-A1; CA2644792-C	Tidal energy structure in tidal power plant for generating power from tidal water in impoundment pond, has containment walls provided with open end and narrow end such that turbines are being placed near waist of hourglass.	FORAN D	FORAN D (FORA-Individual)	2010G77087	NOVELTY - The tidal energy structure has hourglass shaped containment walls (10) and several turbines. The containment walls are provided with open end and narrow end such that the turbines are being placed near the waist of hourglass.	Q54 (Non-positive displacement fluid engines (i.e. driven by fluid); Miscellaneous motors and machines for producing mechanical power/thrust (F03B,D,G,H)); X15 (Non-Fossil Fuel Power Generating Systems)	X15-C02	F03B-013/26	CA2644792-A1 27 Apr 2010 F03B-013/26 201042 Pages: 26 English	CA2644792-A1 CA2644792 27 Oct 2008	CA2644792 27 Oct 2008	DIIDW:2010G77087
243	P	CN207297223-U	Floating type tide energy generating device, has floating device provided with direct-drive permanent magnetic generator, and blade bracket uniformly fixed with wheel hub, where end of blade bracket is equipped with generating blade.	XU Z	CHENGDU FSP TECHNOLOGY CO LTD (CHEN-Non-standard)	2018360936	NOVELTY - The utility model claims a floating type tide energy generating device, comprising a floating device, the floating device is provided with a direct-drive permanent magnetic generator, a direct-drive permanent magnet generator through the transmission line is connected with a storage battery; the direct-drive permanent magnetic generator is connected to the lower end of tidal energy gene…	Q24 (Ships; waterborne vessels; related equipment (B63)); Q54 (Non-positive displacement fluid engines (i.e. driven by fluid); Miscellaneous motors and machines for producing mechanical power/thrust (F03B,D,G,H)); X15 (Non-Fossil Fuel Power Generating Systems)	Q24-P08; Q54-X; X15-C02	B63B-035/44; F03B-013/26	CN207297223-U 01 May 2018 F03B-013/26 201833 Pages: 10 Chinese	CN207297223-U CN20888535 21 Jul 2017	CN20888535 21 Jul 2017	DIIDW:2018360936
244	P	CN203080542-U	Concrete and steel structure combined tide energy generating gravity type base for use in tide energy power generation industry, has hydraulic supporting column whose upper part is connected with water turbine by bolt.	LV N	CHINA HYDROPOWER ENG CONSULTING GROUP ZH (CHHY-Non-standard)	2013T66660	NOVELTY - This utility model claims a kind of concrete and steel structure are combined with the tide energy generating type. This utility model aims to provide a kind of simple structure, safety and reliability, simple and convenient construction and can realize water concrete and steel structure maintaining the tide power generator combined with a gravity type base and reduce the engineering co…	Q42 (Hydraulic engineering, soil shifting and sewerage (E02, 3)); X15 (Non-Fossil Fuel Power Generating Systems)	X15-C02	E02D-027/42; E02D-027/44	CN203080542-U 24 Jul 2013 E02D-027/42 201372 Pages: 7 Chinese	CN203080542-U CN20709207 20 Dec 2012	CN20709207 20 Dec 2012	DIIDW:2013T66660
245	P	IN201500094-I4	Apparatus for generation of electric energy from tidal energy, has tidal mill that is placed over pillar in ten meter deep coastal water where sea surface level remains almost constant during high tide and low tide periods.	GANESAN V	GANESAN V (GANE-Individual)	2016675920	NOVELTY - The apparatus has tidal mill, paddles, support pillar and turbine. The tidal current is used to operate the turbines which are located above the sea surface. The tidal mill is placed over pillar in 10 meter deep coastal water where the sea surface level remains almost constant during high tide and low tide periods.	Q54 (Non-positive displacement fluid engines (i.e. driven by fluid); Miscellaneous motors and machines for producing mechanical power/thrust (F03B,D,G,H))	Q54-X	F03B-013/00	IN201500094-I4 08 Jul 2016 F03B-013/00 201674 Pages: 9 English	IN201500094-I4 INCH00094 06 Jan 2015	INCH00094 06 Jan 2015	DIIDW:2016675920
246	P	CN102562426-A	Tidal energy rate strengthening device, has electric rotating wheel connected with motor through transmission device i.e. transmission belt, and power supply module connected with electric switch by wire.	ZHOU R	SHANGHAI JINYUAN SENIOR HIGH SCHOOL (SHAN-Non-standard)	2012K95251	NOVELTY - The device has an electric rotating wheel connected with a motor through a transmission device i.e. transmission belt, and a power supply module connected with an electric switch by a wire. The rotating wheel is provided with an electric rotating shaft that provides electric bypass rotating speed. The power supply module is provided with a switch, which is connected with the rotating sh…	Q54 (Non-positive displacement fluid engines (i.e. driven by fluid); Miscellaneous motors and machines for producing mechanical power/thrust (F03B,D,G,H)); X11 (Power Generation and High Power Machines); X15 (Non-Fossil Fuel Power Generating Systems)	X11-B; X11-J05A; X15-C02	F03B-013/26; H02K-007/10	CN102562426-A 11 Jul 2012 F03B-013/26 201263 Pages: 5 Chinese	CN102562426-A CN10616616 31 Dec 2010	CN10616616 31 Dec 2010	DIIDW:2012K95251
247	P	CN220542956-U	Flow rate detection device for use in tidal energy machine set, has fixed frame table corresponding to end of cross beam, and flow speed detecting unit set on table, where end of beam is extended towards direction far away from set platform.	LIU J	THREE GORGES NEW ENERGY OFFSHORE WIND (THRE-Non-standard)	202423340X	NOVELTY - The utility model relates to the technical field of tidal energy power generation, and discloses a flow speed detection device and tidal energy machine set, comprising: a cross beam, the first end of the cross beam is suitable for connecting with the tide energy machine set platform, the second end of the cross beam is suitable for extending towards the direction far away from the tide …	Q54 (Non-positive displacement fluid engines (i.e. driven by fluid); Miscellaneous motors and machines for producing mechanical power/thrust (F03B,D,G,H)); S02 (Engineering Instrumentation); X11 (Power Generation and High Power Machines)	Q54-X; S02-G02; X11-B01; X11-B10	F03B-013/00; F03B-011/00; G01P-001/00; G01P-005/00	CN220542956-U 27 Feb 2024 G01P-005/00 202419 Chinese	CN220542956-U CN22221566 17 Aug 2023	CN22221566 17 Aug 2023	DIIDW:202423340X
248	P	CN109973286-A	Tidal energy generating device, has first pipeline and second pipeline connected with second shell that is provided with second chamber, where second chamber is fixed with first chamber that is fixed with outer cross section.	WANG H	WANG H (WANG-Individual)	2019612245	NOVELTY - The device has a first shell (1) provided with a water inlet pipe (11) that is fixed with a first chamber and provided with a generating set. A second shell (2) is provided with a first pipeline (21) and a second pipeline (22). The first pipeline and the second pipeline are connected with a second shell that is provided with a second chamber. The second chamber is fixed with the first c…	Q54 (Non-positive displacement fluid engines (i.e. driven by fluid); Miscellaneous motors and machines for producing mechanical power/thrust (F03B,D,G,H)); X15 (Non-Fossil Fuel Power Generating Systems)	Q54-X; X15-C01; X15-C02	F03B-013/14; F03B-013/26; F03B-011/00	CN109973286-A 05 Jul 2019 F03B-013/14 201963 Pages: 7 Chinese	CN109973286-A CN10220769 22 Mar 2019	CN10220769 22 Mar 2019	DIIDW:2019612245
249	P	CN109726349-A; CN109726349-B	Tidal energy flux precision calculation method, involves performing sea area superposition to obtain sea, calculating energy flux density by seabed to sea surface unit width section, and where energy flux as energy flux density moisture.	XU X	FIRST INST OCEANOGRAPHY SOA (GJHY-C)	201942680F	NOVELTY - The method involves generating original tide potential and paying attention potential. The difference tidal component coefficient related to latitude in original tide generating potential is calculated. When the semi- diurnal tide and diurnal tide are respectively equal to north latitude, where the north latitude is positive and the south latitude is negative. A sea area is performed th…	T01 (Digital Computers)	T01-J04	G06F-017/10	CN109726349-A 07 May 2019 G06F-017/10 201950 Pages: 9 Chinese	CN109726349-A CN11519149 12 Dec 2018	CN11519149 12 Dec 2018	DIIDW:201942680F
250	P	CN102494143-A	Marine tidal energy generating set main shaft seal leakage preventing method, involves connecting main shaft sealing ring with motor shell, and compressing air pressure in main shaft by external water pressure.	CAO D	HARBIN ELECTRIC MACHINERY CO LTD (HRBE-C)	2012J16050	NOVELTY - The method involves connecting a main shaft sealing ring (1) with a motor shell. Air pressure in the main shaft is compressed by external water pressure.	Q54 (Non-positive displacement fluid engines (i.e. driven by fluid); Miscellaneous motors and machines for producing mechanical power/thrust (F03B,D,G,H)); Q65 (Pistons, cylinders, packing (F16J))		F03B-011/00; F16J-015/40	CN102494143-A 13 Jun 2012 F16J-015/40 201248 Pages: 5 Chinese	CN102494143-A CN10380026 25 Nov 2011	CN10380026 25 Nov 2011	DIIDW:2012J16050
251	P	CN103267623-A; CN103267623-B	Tide energy data collecting device has auxiliary supporting rod that is fixed on water tank, and is fixedly connected with one end of vertical rod whose other end is connected with flow rate measuring device.	WAN M	UNIV ZHEJIANG (UYZH-C)	2013V21821	NOVELTY - The device has a main supporting rod (11) that is fixed on a water tank (1), and provided with a torque sensor (2) and a porous disc (3). A movable disc is provided with a cylindrical bump. The main disc device is provided with a guide rail. The porous disc is provided with several water flow holes. The disc devices are connected with a bolt through a central hole. An auxiliary supporti…	S02 (Engineering Instrumentation)	S02-J07	G01M-010/00	CN103267623-A 28 Aug 2013 G01M-010/00 201377 Pages: 9 Chinese	CN103267623-A CN10142878 22 Apr 2013	CN10142878 22 Apr 2013	DIIDW:2013V21821
252	P	CN110863939-A; CN110863939-B	Tidal energy generating device for use in coastal areas, has fan blade provided with fan blade body, pushing plate fixedly connected to end of extension plate away from connecting post, and guide groove formed with side wall of fan blade.	FAN Y	HANGZHOU LESHOU TECHNOLOGY CO LTD (HANG-Non-standard)	2020208826	NOVELTY - The device has power generation chambers (3) that are excavated on a tidal dam main body (1). A power generation device is fixedly connected to a top plate of the power generation chamber. The power generation device is provided with a power generator body (4). A transmission shaft (5) is connected to the power generator body. Fan blades (7) are fixedly connected to a side wall of a tra…	Q42 (Hydraulic engineering, soil shifting and sewerage (E02, 3)); Q54 (Non-positive displacement fluid engines (i.e. driven by fluid); Miscellaneous motors and machines for producing mechanical power/thrust (F03B,D,G,H)); X11 (Power Generation and High Power Machines); X15 (Non-Fossil Fuel Power Generating Systems)	Q42-A01; Q42-A02A; Q42-A02B; Q42-A03; Q54-A05; Q54-X; X11-B01; X15-C02A2	E02B-003/06; E02B-005/08; E02B-008/08; E02B-009/08; F03B-011/08; F03B-013/26; F03B-003/12; F03B-003/14	CN110863939-A 06 Mar 2020 F03B-013/26 202023 Pages: 14 Chinese	CN110863939-A CN11139810 20 Nov 2019	CN11139810 20 Nov 2019	DIIDW:2020208826
253	P	CN103573547-A; CN103573547-B	Tidal energy generating device, has roller provided with blade, hydraulic lifting device whose upper hydraulic jar is provided with two suction pipes, and water outlet pipe provided with one-way valve.	CHEN Z	NINGBO ZHENHAI JIEDENG APPLIED TECHNOLOG (NING-Non-standard)	2014G50320	NOVELTY - The device has an upper fixing frame shaft connected with a connecting rod. An upper shaft of the connecting rod is connected with a roller shaft. An upper part of the roller shaft of the connecting rod is provided with a roller. The roller is provided with a blade. An upper hydraulic jar of the hydraulic lifting device is provided with two suction pipes. The suction pipes are respectiv…	Q54 (Non-positive displacement fluid engines (i.e. driven by fluid); Miscellaneous motors and machines for producing mechanical power/thrust (F03B,D,G,H)); X15 (Non-Fossil Fuel Power Generating Systems)	X15-C02	F03B-013/26	CN103573547-A 12 Feb 2014 F03B-013/26 201426 Pages: 7 Chinese	CN103573547-A CN10258034 25 Jul 2012	CN10258034 25 Jul 2012	DIIDW:2014G50320
254	P	US2016319798-A1; WO2016179048-A2; WO2016179048-A3; WO2016179048-A4; AU2016257736-A1; CA2983451-A1; IN201717038239-A; KR2018004188-A; EP3289214-A2; PH12017501860-A1; CN107850037-A; JP2018514703-W; ID201806023-A; US10378504-B2; CA2983451-C	Tidal energy conversion assembly use in tidal energy conversion system, has directional converter which activates generator to generate electricity when displacement vessel changes its position relative to stationary location.	BAGLEY C	BIG MOON POWER INC (BIGM-Non-standard)	2016688904	NOVELTY - The tidal energy conversion assembly (100) has a displacement vessel (102) supporting a directional converter that is coupled to a generator (116), and anchor cables (103a,103c) having a first end, a second end, and a length in between first end and second end. The displacement vessel is spaced from the stationary location at a first distance. A directional converter (109) activates gen…	A95 (Transport - including vehicle parts, tyres and armaments.); A88 (Mechanical engineering and tools e.g. valves, gears and conveyor belts.); V06 (Electromechanical Transducers and Small Machines); W06 (Aviation, Marine and Radar Systems); X11 (Power Generation and High Power Machines); X15 (Non-Fossil Fuel Power Generating Systems)	A12-E08B; A12-H; A12-T02; A12-T04; V06-M10; W06-C01C; X11-B; X11-J05B; X15-C02	B63B-035/44; F03B-013/26; H02K-007/18; F03B-013/18; B63B-035/00; F03B-017/06; B63B-021/50	US2016319798-A1 03 Nov 2016 F03B-013/26 201675 Pages: 77 English	US2016319798-A1 US143440 29 Apr 2016	US155538P 01 May 2015	DIIDW:2016688904
255	P	WO2013006088-A1; RU2011127210-A	Wave and tidal energy device has flexible coupling that connects cylinder to anchor, and slung over pulley with one end connected to cylinder and other to rod of piston.	KOLEVATOV M N	KOLEVATOV M N (KOLE-Individual)	2013A82419	NOVELTY - The wave and tidal energy device has a floating pontoon with pulley. A vertical cylinder with positive buoyancy is connected by flexible coupling to anchor moored to the sea floor. Piston disposed inside cylinder is capable of downward reciprocating movement under the effect of cylinder weight. A spring provides upward movement by displacement of floating pontoon to enable working fluid…	Q54 (Non-positive displacement fluid engines (i.e. driven by fluid); Miscellaneous motors and machines for producing mechanical power/thrust (F03B,D,G,H)); X15 (Non-Fossil Fuel Power Generating Systems)	X15-C01; X15-C02	F03B-013/12; F03B-013/00	WO2013006088-A1 10 Jan 2013 F03B-013/12 201307 Pages: 17 Russian	WO2013006088-A1 WORU000451 09 Jun 2012	RU127210 01 Jul 2011	DIIDW:2013A82419
256	P	CN115305875-A; CN115305875-B	Ecological isolation device for tidal energy power generation, has driving component for driving two separating net plates to rotate and open, and inserting component for inserting ground to fix tidal energy generating device.	CHEN X	CHEN X (CHEN-Individual)	2022E2304D	NOVELTY - The device has a frame body provided with a driving component that is connected with a separating net plate. The driving component drives the separating net plates to rotate and open. A lower portion of the separating mesh plate is provided with an inserting component. The inserting component is used for inserting a ground to fix tidal energy generating ecological isolating device. The …	Q42 (Hydraulic engineering, soil shifting and sewerage (E02, 3)); X15 (Non-Fossil Fuel Power Generating Systems)	Q42-A01; Q42-A03; X15-C02	E02B-005/08; E02B-009/08; F03B-013/26	CN115305875-A 08 Nov 2022 E02B-005/08 202293 Chinese	CN115305875-A CN10841206 18 Jul 2022	CN10841206 18 Jul 2022	DIIDW:2022E2304D
257	P	CN103122822-A; CN103122822-B	Tide energy sea wave energy power generation device, has main body installed on bottom end of energy storage device, connection shaft connected with floating box and provided with water turbine, and box connected with sea anchor.	XU Y	DONGGUAN JIELUN RUBBER LAMPS CO LTD (DONG-Non-standard)	2013R12706	NOVELTY - The device has a main body installed on a bottom end of an energy storage device. A floating box is provided with a sealing cover. The sealing cover is located on a water surface. The energy storage device is provided with a storage battery. A rotor is located in a round hole. A coil is sleeved with the rotor. A water turbine is installed on a bottom end of the floating box. A connectio…	Q54 (Non-positive displacement fluid engines (i.e. driven by fluid); Miscellaneous motors and machines for producing mechanical power/thrust (F03B,D,G,H)); X11 (Power Generation and High Power Machines); X15 (Non-Fossil Fuel Power Generating Systems)	X11-B01; X15-C01; X15-C02	F03B-013/22; F03B-013/26; H02K-035/02	CN103122822-A 29 May 2013 F03B-013/26 201367 Pages: 8 Chinese	CN103122822-A CN10047673 06 Feb 2013	CN10047673 06 Feb 2013	DIIDW:2013R12706
258	P	CN219827021-U	Tide energy unit operation and maintenance lifting device, has locating component whose movable part is matched with grabbing beam component and/or tide energy machine set component along second direction.	DUAN Y	HANGZHOU BENCHUANG TECHNOLOGY CO LTD (ZJIC-C)	2023A8880Q	NOVELTY - The utility model claims an operation and maintenance lifting device of tide energy machine set. the tide energy unit operation and maintenance lifting device comprises: a fixing bracket capable of being fixed on the selected base body; a lifting driving component arranged on the fixed bracket; a grabbing beam component, which is in transmission connection with the lifting driving compo…	Q54 (Non-positive displacement fluid engines (i.e. driven by fluid); Miscellaneous motors and machines for producing mechanical power/thrust (F03B,D,G,H)); X15 (Non-Fossil Fuel Power Generating Systems)	Q54-A05; Q54-X; X15-C02; X15-C15	F03B-011/00; F03B-011/02; F03B-013/26; F03B-003/00	CN219827021-U 13 Oct 2023 F03B-013/26 202386 Chinese	CN219827021-U CN20424062 02 Mar 2023	CN20424062 02 Mar 2023	DIIDW:2023A8880Q
259	P	CN206125338-U	Tidal energy turbine power generation marine buoy, has buoy main body connected with generator that is connected with radar box and platform, and electric room connected with electric energy storage unit and supplying power unit.	WANG Q	UNIV JIANGSU SCI & TECHNOLOGY (UYJG-C)	201727672F	NOVELTY - The utility model claims a marine buoy for tidal-energy water turbine power generation, belonging to the technical field of buoy. The utility model comprises a buoy body and tide energy turbine generator; the radar box and warning said buoy main body comprises a platform, an electric chamber and a bracket platform is arranged on the bracket, the tide energy turbine generator is provided…	Q54 (Non-positive displacement fluid engines (i.e. driven by fluid); Miscellaneous motors and machines for producing mechanical power/thrust (F03B,D,G,H)); X11 (Power Generation and High Power Machines); X15 (Non-Fossil Fuel Power Generating Systems)	Q54-A05; Q54-X; X11-B01; X11-U05; X15-C02	B63B-022/16; F03B-013/26; F03B-003/16	CN206125338-U 26 Apr 2017 B63B-022/16 201731 Pages: 6 Chinese	CN206125338-U CN21058356 14 Sep 2016	CN21058356 14 Sep 2016	DIIDW:201727672F
260	P	CN204152711-U	Electric power generation device integrated ship, has ship body provided with tide energy collector, wave energy collector connected to terminal connecting, and ship body damping mechanism arranged in stress surface of ship body.	WANG S	UNIV SHANGHAI OCEAN (USHO-C)	201521493L	NOVELTY - This utility new type relates to one from a generation device, belonging to the electric power device field. A boat one generation device, comprising a ship body, b. middle of tide energy collector body, two symmetrically set b of the tide energy collector left and a right side surface of tide energy generator, two symmetrically set with a wave energy collector b left and right two side…	W06 (Aviation, Marine and Radar Systems); X11 (Power Generation and High Power Machines); X15 (Non-Fossil Fuel Power Generating Systems)	W06-C01; X11-B; X11-U05; X15-C01; X15-C02	F03B-013/12	CN204152711-U 11 Feb 2015 F03B-013/12 201523 Chinese	CN204152711-U CN20590488 13 Oct 2014	CN20590488 13 Oct 2014	DIIDW:201521493L
261	P	CN103061951-A; CN103061951-B	Composite type vertical shaft tide energy turbine, has external frame embedded in inner part of H-structure through transmission structure, and extending arm and bearing connected and fixed by bolt.	WANG J	UNIV CHINA OCEAN (UYOC-C)	2013P76039	NOVELTY - The turbine has an external frame embedded in an inner part of an H-structure through a transmission structure. The H-structure is provided with three blades, and an included angle between the three blades is obtained about 120 degrees. An extending arm and a bearing are connected and fixed by a bolt. The transmission structure is connected with a frame structure, and a top is connected…	Q54 (Non-positive displacement fluid engines (i.e. driven by fluid); Miscellaneous motors and machines for producing mechanical power/thrust (F03B,D,G,H))		F03B-003/00; F03B-003/12	CN103061951-A 24 Apr 2013 F03B-003/00 201364 Pages: 8 Chinese	CN103061951-A CN10556394 19 Dec 2012	CN10556394 19 Dec 2012	DIIDW:2013P76039
262	P	CN202091101-U	Movable ring tidal energy generating device, has power mechanism fixed on main platform whose front part is hinge-jointed on bracket, and rudder hinged with side of movable ring, where upper part of rudder is provided with floating body.	MA M	MA M (MAMM-Individual)	2012A76659	NOVELTY - The device has a power mechanism fixed on a main platform whose front part is hinge-jointed on a bracket. A part of the main platform is provided with a floating part. A connecting rod is inserted into reservoir to move an energy conversion device. An output shaft is connected with an electric energy output device. A front part of two sides of the platform is provided with a buoy. A rea…	Q54 (Non-positive displacement fluid engines (i.e. driven by fluid); Miscellaneous motors and machines for producing mechanical power/thrust (F03B,D,G,H)); X11 (Power Generation and High Power Machines); X15 (Non-Fossil Fuel Power Generating Systems)	X11-B; X11-J05A; X11-J05B; X15-C01; X15-C02	F03B-013/14; F03B-013/26; H02K-007/10; H02K-007/116; H02K-007/18	CN202091101-U 28 Dec 2011 F03B-013/26 201209 Pages: 11 Chinese	CN202091101-U CN20186009 03 Jun 2011	CN20186009 03 Jun 2011	DIIDW:2012A76659
263	P	CN201794707-U	Tidal energy conversion power equipment, has two racks installed on two inner sides of frame, two fly wheels meshed with two racks, and transmission shaft fixedly penetrating through bearing, where outer ring of bearing is fixed.	XIAO X	XIAO X (XIAO-Individual)	2011F47048	NOVELTY - The equipment has a transmission mechanism provided with a frame, two fly wheels, two racks, a transmission shaft and a bearing. The fly wheels are arrayed in parallel and positively sleeved into a rotary shaft. The frame is fixedly connected with a connection rod of a piston device group. Two sides of the frame are connected with a sleeve of the piston device group in parallel. The rac…	Q54 (Non-positive displacement fluid engines (i.e. driven by fluid); Miscellaneous motors and machines for producing mechanical power/thrust (F03B,D,G,H)); X15 (Non-Fossil Fuel Power Generating Systems)	X15-C02	F03B-013/26; F03B-015/00	CN201794707-U 13 Apr 2011 F03B-013/26 201135 Pages: 13 Chinese	CN201794707-U CN20555679 30 Sep 2010	CN20555679 30 Sep 2010	DIIDW:2011F47048
264	P	CN113969858-A	Double-blade wheel type tide energy conversion device for use in tidal energy generating device, has box body floating on sea surface, and energy storage module connected with energy amplifying module and used for converting mechanical energy into electric energy.	SHE M	UNIV SOUTHWEST PETROLEUM (USWP-C)	202222238V	NOVELTY - The device has a box body floating on a sea surface. The bottom part of the box body is provided with a tidal energy conversion module. The tidal energy conversion module comprises an energy collecting module at the lower side of the box body, an energy amplifying module and an energy storage module in the box body. The energy collecting module is a double-impeller structure symmetrical…	Q54 (Non-positive displacement fluid engines (i.e. driven by fluid); Miscellaneous motors and machines for producing mechanical power/thrust (F03B,D,G,H)); V06 (Electromechanical Transducers and Small Machines); X11 (Power Generation and High Power Machines); X15 (Non-Fossil Fuel Power Generating Systems)	Q54-X; Q54-G; Q54-A05; V06-M10; X11-J05B; X11-J05A; X11-B01; X15-C02; X15-B01	F03B-013/26; F03B-003/12; F03D-001/02; F03D-001/06; F03D-013/25; F03D-015/00; F03D-009/25; H02K-007/116; H02K-007/18	CN113969858-A 25 Jan 2022 F03B-013/26 202225 Chinese	CN113969858-A CN11224034 18 Oct 2021	CN11224034 18 Oct 2021	DIIDW:202222238V
265	P	CN111396240-A; CN111396240-B	Tidal energy generating device based on mechanical transmission, comprises a platform whose bottom is movably connected with a first connecting rod, and inside of the first fixing piece is movably connected with a spherical connecting piece.	XU J	XU J (XUJJ-Individual)	202066637E	NOVELTY - The tidal energy generating device comprises a platform (1) whose bottom is movably connected with a first connecting rod (2), and the outer side of the first connecting rod is sleeved with a sleeve rod (3). The inside of the first fixing piece is movably connected with a spherical connecting piece, and one end of the second connecting rod is movably connected to the third connecting ro…	A88 (Mechanical engineering and tools e.g. valves, gears and conveyor belts.); Q54 (Non-positive displacement fluid engines (i.e. driven by fluid); Miscellaneous motors and machines for producing mechanical power/thrust (F03B,D,G,H)); Q64 (Belts, chains, gearing (F16G,H)); X15 (Non-Fossil Fuel Power Generating Systems)	A12-H03; Q54-X; Q64-C01; X15-C02	F03B-013/26; F16H-037/12	CN111396240-A 10 Jul 2020 F03B-013/26 202062 Pages: 10 Chinese	CN111396240-A CN10248298 01 Apr 2020	CN10248298 01 Apr 2020	DIIDW:202066637E
266	P	CN204144965-U	Tide energy generation of composite power grid system, has main frame that is mounted on fixed unit on bridge piers stand, in which main frame is located below water surface, and is moved vertically on bridge piers.	LI M	GUODIAN UNITED POWER TECHNOLOGY CO LTD (CGUO-C)	201520333L	NOVELTY - This utility new type claims a one use tide energy generation of composite power grid system, comprising by intermittent energy generation system, an energy storage system, a load compose a micro electric grid sub-system, further comprising incorporating tide energy of the micro electric grid generation system sub-system, an external power grid system. The tide energy generation system …	X12 (Power Distribution/Components/Converters); X15 (Non-Fossil Fuel Power Generating Systems)	X12-H01B; X15-C02	H02J-003/38	CN204144965-U 04 Feb 2015 H02J-003/38 201522 Pages: 9 Chinese	CN204144965-U CN20417068 25 Jul 2014	CN20417068 25 Jul 2014	DIIDW:201520333L
267	P	CN104215849-A; CN104215849-B	Tide energy generation hydrodynamic simulate testing platform, has simulate system fixed with driver and motor, and upper computer fixed with controller and tide energy simulator through communication interface.	LU X	CNR WIND TURBINE CO LTD (CRRC-C)	201509833L	NOVELTY - The platform has a simulate system fixed with a driver and a motor. An input end of the driver is connected with an output end of a tide energy simulator through a data line. An output end of the driver is connected with an input end of the motor. A prototype machine is provided with a machine set and a converter. An output end of the converter is connected with an input end of transfor…	S01 (Electrical Instruments); T01 (Digital Computers)	S01-H09; T01-N02B2B	G01R-031/00	CN104215849-A 17 Dec 2014 G01R-031/00 201513 Pages: 7 Chinese	CN104215849-A CN10441353 02 Sep 2014	CN10441353 02 Sep 2014	DIIDW:201509833L
268	P	CN110009254-A; CN110009254-B	Method for programming variable weight minimum spanning tree based tide energy generating farm collector system, involves establishing optimized programming model, and calculating equivalent cost of submarine cable as sum of matrix element.	REN Z	UNIV CHONGQING (UYCQ-C)	201963085T	NOVELTY - The method involves obtaining an input parameter of a collecting system. A probability distribution model is established for an output of a tidal energy generator. A grouping parameter is calculated, where the grouping parameter mainly comprises a set angle, generator grouping number, and each unit number in a group limit. The set angle is divided into groups based on an angle of the se…	Q54 (Non-positive displacement fluid engines (i.e. driven by fluid); Miscellaneous motors and machines for producing mechanical power/thrust (F03B,D,G,H)); T01 (Digital Computers); X15 (Non-Fossil Fuel Power Generating Systems)	Q54-X; T01-E03; T01-E04; T01-J04C; T01-J05A1; T01-J05A2C; T01-J10B2; X15-C02	F03B-013/26; G06K-009/62; G06Q-010/04; G06Q-010/06; G06Q-050/06	CN110009254-A 12 Jul 2019 G06Q-010/06 201966 Pages: 26 Chinese	CN110009254-A CN10301939 16 Apr 2019	CN10301939 16 Apr 2019	DIIDW:201963085T
269	P	CN113898523-A	Power generating device based on tidal energy has protection component provided with impact detecting plate, each generator uniformly set on side of rack away from connecting rod, and each gear respectively connected with corresponding generator and engaged with rack.	FENG Y	TAIZHOU YUNTAO LIANWU TECHNOLOGY CO LTD (TAIZ-Non-standard)	202218778N	NOVELTY - Device comprises a box body (1) whose side is provided with first water inlet and second water inlet. A turbine (2) is set in the first water inlet. A protection component (3) is provided with an impact detecting plate. The impact detecting plate is set in a movable groove. A floating plate (42) is movably connected with a limiting frame (41). A rack is glidingly connected with the box …	Q54 (Non-positive displacement fluid engines (i.e. driven by fluid); Miscellaneous motors and machines for producing mechanical power/thrust (F03B,D,G,H)); X15 (Non-Fossil Fuel Power Generating Systems)	Q54-X; X15-C02	F03B-013/26; F03B-015/18	CN113898523-A 07 Jan 2022 F03B-013/26 202215 Chinese	CN113898523-A CN11232107 22 Oct 2021	CN11232107 22 Oct 2021	DIIDW:202218778N
270	P	US10514020-B1; WO2020246971-A1; EP3976956-A1; EP3976956-A4	Closed system for continuous extraction of head-driven tidal energy, in which tidal energy is captured by onshore flow turbine and offshore flow turbine by altering tidal water level above offshore bladder.	RESIO D T	UNIV NORTH FLORIDA (UYNF-Non-standard)	2019A7165N	NOVELTY - The system has an onshore flow line (12) that couples a offshore bladder (10) to a primary onshore bladder (20). The onshore flow line includes an onshore flow turbine (42). A high-tide diversion line (16) is branched from the onshore flow line to a supplemental onshore bladder (30). An offshore flow line (14) couples the primary onshore bladder to the offshore bladder. The offshore flo…	Q54 (Non-positive displacement fluid engines (i.e. driven by fluid); Miscellaneous motors and machines for producing mechanical power/thrust (F03B,D,G,H)); X15 (Non-Fossil Fuel Power Generating Systems)	Q54-X; X15-C01B1; X15-C01B2; X15-C02	F03B-013/26; F03B-013/10; F03B-013/12; F03B-013/14; F03B-013/18	US10514020-B1 24 Dec 2019 F03B-013/26 201999 Pages: 10 English	US10514020-B1 US429840 03 Jun 2019	US429840 03 Jun 2019	DIIDW:2019A7165N
271	P	CN111271212-A	Oscillating buoy type wave energy and tide energy combined generating device, has impellers fixed on impeller fixing plate that is fixed on bearing support frame, where bearing support frame is fixedly sleeved on rotating shaft.	QU K	UNIV HOHAI (UYHO-C)	202054937C	NOVELTY - The device has a rotating shaft (1) whose two ends are respectively connected to two upright posts (2). An overrunning clutch is sleeved on the rotating shaft. An end of the transmission cable is fixedly connected to an oscillating float. An overrunning clutch is fixedly connected with a sinking block. A pulley is fixed on a seabed heavy object. A tidal current generator set is provided…	Q54 (Non-positive displacement fluid engines (i.e. driven by fluid); Miscellaneous motors and machines for producing mechanical power/thrust (F03B,D,G,H)); X15 (Non-Fossil Fuel Power Generating Systems)	Q54-A05; Q54-X; X15-C01A1; X15-C02	F03B-013/18; F03B-013/26; F03B-003/12; F03B-003/18	CN111271212-A 12 Jun 2020 F03B-013/18 202053 Pages: 7 Chinese	CN111271212-A CN10168575 12 Mar 2020	CN10168575 12 Mar 2020	DIIDW:202054937C
272	P	CN206503671-U	Tidal energy power machine, has line wheel and first traction rope that are connected with each other, and second traction rope whose end is connected with floating box that is fixed with fixed wheel of submarine.	GAN Y	GAN Y (GANY-Individual)	2017650026	NOVELTY - The utility model claims a tidal energy power machine, comprising a floating box, said floating box is provided with an opening, the floating tank is provided with a drain pipe, the water discharging pipe is equipped with a control valve; a bracket; the bracket is provided with a transmission shaft; the transmission shaft is provided with a first wire wheel and the second wire wheel; on…	Q54 (Non-positive displacement fluid engines (i.e. driven by fluid); Miscellaneous motors and machines for producing mechanical power/thrust (F03B,D,G,H)); X15 (Non-Fossil Fuel Power Generating Systems)	Q54-X; X15-C02	F03B-013/26	CN206503671-U 19 Sep 2017 F03B-013/26 201767 Pages: 7 Chinese	CN206503671-U CN21225215 15 Nov 2016	CN21225215 15 Nov 2016	DIIDW:2017650026
273	P	CN102943957-A; CN102943957-B	Tide energy supply device, has cylinder body whose lower end is provided with opening, and storage tank provided with supply device to supply gas to charging interface, where opening is attached with piston rod.	ZHANG Z	UNIV ZHEJIANG NINGBO TECHNOLOGY INST (NBLG-C)	2013J13378	NOVELTY - The device has a piston (4) whose upper end is fixedly connected with a lower end of a frame type piston rod (5). A floating body (6) is fixedly connected with an upper end of a cylinder body (3) providing a gas flow. An air outlet (11) prevents the gas flow from a gas storage tank (8). A one-way valve (9) is connected with the storage tank. A lower end of the cylinder body is provided …	J06 (Storing or distributing gases or liquids - including gas holders, vessels for gases, decantation and vaporisation of gases, pipelines and pipe systems, but excluding those for hydrocarbon gases or liquids and laying of pipelines (F17).); Q54 (Non-positive displacement fluid engines (i.e. driven by fluid); Miscellaneous motors and machines for producing mechanical power/thrust (F03B,D,G,H)); …	J06-B03; X15-C02	F03B-013/26; F17C-005/00	CN102943957-A 27 Feb 2013 F17C-005/00 201344 Pages: 10 Chinese	CN102943957-A CN10411719 25 Oct 2012	CN10411719 25 Oct 2012	DIIDW:2013J13378
274	P	CN102146682-A; CN102146682-B	Marine tide energy generating seabed fixing device for imitating crab shape structure, has supporting leg connected with adjusting leg by cylindrical pin, where adjusting leg is inserted into adjusting holes in different positions by bolt.	ZHANG M	CHINA ACAD MACHINERY SCI & TECHNOLOGY AD (ZZRI-C)	2011L23866	NOVELTY - The device has a fixing leg (2) fixed on a supporting platform (1) and connected with an adjusting leg (3) by a connecting shaft. A supporting leg (9) is connected with the adjusting leg by a cylindrical pin. The fixing leg is connected with the supporting leg after connecting with the adjusting leg by the connecting shaft. The adjusting leg is inserted into the adjusting holes in diffe…	Q42 (Hydraulic engineering, soil shifting and sewerage (E02, 3)); Q54 (Non-positive displacement fluid engines (i.e. driven by fluid); Miscellaneous motors and machines for producing mechanical power/thrust (F03B,D,G,H)); X15 (Non-Fossil Fuel Power Generating Systems)	X15-C02	E02D-029/09; F03B-013/26	CN102146682-A 10 Aug 2011 E02D-029/09 201159 Pages: 7 Chinese	CN102146682-A CN10051963 04 Mar 2011	CN10051963 04 Mar 2011	DIIDW:2011L23866
275	P	CN102192077-A; CN102192077-B	High wave energy and high tide energy storage system, has outer ratchet wheel ring fixed at main shaft, inner ratchet wheel ring meshed with outer ratchet wheel ring, and flexible member wound on inner ratchet wheel ring.	CHEN D	SHANGHAI MEI FENG ZHENGJIE CLEAN ENERGY (SHAN-Non-standard)	2011N39389	NOVELTY - The system has a ratchet wheel fixed on a main shaft, and a flexible member surrounding the ratchet wheel. A suspension floating body energy storage assembly and a suspension balance assembly i.e. balance rod, are connected with the flexible member. The ratchet wheel is provided with an inner ratchet wheel ring and an outer ratchet wheel ring. The outer ratchet wheel ring is fixed at th…	Q54 (Non-positive displacement fluid engines (i.e. driven by fluid); Miscellaneous motors and machines for producing mechanical power/thrust (F03B,D,G,H)); X11 (Power Generation and High Power Machines); X15 (Non-Fossil Fuel Power Generating Systems)	X11-B; X11-J05; X15-C01; X15-C02	F03B-013/18; F03B-013/26	CN102192077-A 21 Sep 2011 F03B-013/18 201174 Pages: 19 Chinese	CN102192077-A CN10064825 17 Mar 2011	CN10064825 17 Mar 2011	DIIDW:2011N39389
276	P	CN108869144-A; CN108869144-B	Pitch control system for tidal energy generating assembly, has pitch control unit connected with Ethernet switch, which is connected with tidal energy generating assembly in energy mode of communication.	TANG J	GUAN HUADIAN TIANREN CONTROL EQUIP CO (GUAN-Non-standard)	201895372T	NOVELTY - The system has a pitch control unit for controlling a permanent magnet synchronous motor. An external main control device of a tidal energy generating assembly receives instruction, where paddle operation is executed according to the instruction. The pitch control unit is connected with an Ethernet switch, which is connected with the tidal energy generating assembly in energy mode of co…	Q54 (Non-positive displacement fluid engines (i.e. driven by fluid); Miscellaneous motors and machines for producing mechanical power/thrust (F03B,D,G,H)); X15 (Non-Fossil Fuel Power Generating Systems)	Q54-A05; Q54-X; X15-C02; X15-C03	F03B-013/26; F03B-015/00; F03B-003/14	CN108869144-A 23 Nov 2018 F03B-003/14 201901 Pages: 8 Chinese	CN108869144-A CN10675083 27 Jun 2018	CN10675083 27 Jun 2018	DIIDW:201895372T
277	P	CN117738839-A	Tide energy and wave energy comprehensive power generation device, has floater connected with piston and arranged on sea surface, where floater fluctuates up and down along with height of sea surface.	LI P	UNIV SUZHOU VOCATIONAL (UYSV-C)	202433220N	NOVELTY - The device has a generator set provided with a vertically arranged impeller set and a generator. An output shaft of the impeller group is coaxially and fixedly connected with an input shaft of a generator main body. A water storage tank is fixed below an impeller group, where height of multiple water outlets is not lower than a lower end of the impeller group. A piston is movably fixed …	Q54 (Non-positive displacement fluid engines (i.e. driven by fluid); Miscellaneous motors and machines for producing mechanical power/thrust (F03B,D,G,H)); Q42 (Hydraulic engineering, soil shifting and sewerage (E02, 3)); X15 (Non-Fossil Fuel Power Generating Systems); X11 (Power Generation and High Power Machines)	Q54-X; Q42-A02B; Q42-A03; Q42-D03; X15-C01; X15-C02; X11-B01	E02B-009/00; E02B-009/08; F03B-011/00; F03B-013/14; F03B-013/26	CN117738839-A 22 Mar 2024 F03B-013/14 202429 Chinese	CN117738839-A CN11647393 04 Dec 2023	CN11647393 04 Dec 2023	DIIDW:202433220N
278	P	CN111820163-A	Tidal energy abalone breeding box capable of automatically feeding and cleaning the shell, includes a first box body, where the first box body consists of a power cavity, and a power mechanism is provided in the power cavity.	WU X	NINGBO FENGHUA WANMI ELECTRONIC TECHNOLO (NING-Non-standard)	2020A7551P	NOVELTY - The tidal energy abalone breeding box includes a first box body, where the first box body consists of a power cavity. A power mechanism is provided in the power cavity. A motor is fixedly arranged at the lower end wall of the power cavity. The left and right ends of the motor are rotated with a fifth rotating shaft. The left end of the fifth rotating shaft is fixed with a turntable. The…	P14 (Animal management and care (A01K, L, M).); P43 (Sorting, cleaning, waste disposal (B06, B07, B08, B09).)	P14-A02; P14-A05; P43-B99; P43-U05	A01K-061/60; A01K-061/80; B08B-009/087	CN111820163-A 27 Oct 2020 A01K-061/60 202092 Pages: 13 Chinese	CN111820163-A CN10760811 31 Jul 2020	CN10760811 31 Jul 2020	DIIDW:2020A7551P
279	P	CN106593748-A; CN106593748-B	Horizontal shaft tide energy turbine experiment device, has sliding block for penetrating fixing shaft that passes through sliding hole along radial direction, where fixing shaft is embedded in locating hole through sliding hole.	LIN X	UNIV HOHAI (UYHO-C)	201728227L	NOVELTY - The device has a connection shaft installed on a fixed cabin end of an impeller. The impeller comprises a blade and a sliding block that are hinged with the connection shaft through an impeller rear joint. The impeller and an impeller rear plate are oppositely fixed to an end surface of a circumferential track. A root part of the blade is provided with a fixing shaft. The sliding block …	Q54 (Non-positive displacement fluid engines (i.e. driven by fluid); Miscellaneous motors and machines for producing mechanical power/thrust (F03B,D,G,H))	Q54-X	F03B-011/00	CN106593748-A 26 Apr 2017 F03B-011/00 201731 Pages: 8 Chinese	CN106593748-A CN10055422 25 Jan 2017	CN10055422 25 Jan 2017	DIIDW:201728227L
280	P	CN204082424-U	Underwater shaft system rotating protection device for tide energy generation device, has bearing sleeved on rotating shaft, lubricant storage tank formed with water surface, and pipe whose end is formed with lubricant cavity.	CHEN L	HANGZHOU LINDONG NEW ENERGY TECHNOLOGY (HANG-Non-standard)	2015185119	NOVELTY - This utility new type provide a one for tide energy generation of underwater shaft system rotating protection device and tide generation device. Used for tide energy generation of underwater shaft system rotating protection device suitable for b protect the shaft system is below the water surface, shaft system including the rotating shaft and at least one a bearing, bearing is sleeved r…	Q54 (Non-positive displacement fluid engines (i.e. driven by fluid); Miscellaneous motors and machines for producing mechanical power/thrust (F03B,D,G,H)); Q62 (Shafts and bearings (F16C)); X15 (Non-Fossil Fuel Power Generating Systems)	X15-C01; X15-C02	F03B-011/06; F03B-013/12; F16C-033/02; F16C-033/66; F16C-033/74; F16C-033/76; F16C-035/02; F16C-035/04	CN204082424-U 07 Jan 2015 F03B-013/12 201521 Pages: 12 Chinese	CN204082424-U CN20359639 30 Jun 2014	CN20359639 30 Jun 2014	DIIDW:2015185119
281	P	CN201554596-U	Tide energy generator, has base seat connected with end of stretching cable, where another end of stretching cable is connected with floating object.	LI Y	LI Y (LIYY-Individual)	2010L35803	NOVELTY - The generator has a base seat connected with an end of a stretching cable, where another end of the stretching cable is connected with a floating object in which a rotary device is arranged.	Q54 (Non-positive displacement fluid engines (i.e. driven by fluid); Miscellaneous motors and machines for producing mechanical power/thrust (F03B,D,G,H)); X15 (Non-Fossil Fuel Power Generating Systems)	X15-C02	F03B-013/00; F03B-013/26	CN201554596-U 18 Aug 2010 F03B-013/26 201064 Pages: 5 Chinese	CN201554596-U CN20254144 23 Oct 2009	CN20254144 23 Oct 2009	DIIDW:2010L35803
282	P	CN111476680-A	Flux conservation based tidal energy resource evaluation method, involves determining total power generation of turbine, and choosing number of turbines with largest annual power generation to obtain optimal design plan.	WU H	NAT OCEAN TECHNOLOGY CENT (GJHY-C)	202074397Y	NOVELTY - The method involves selecting an evaluation object. Pre-construction geographic location of a tidal energy power station is determined of the evaluation object. Tidal level change process is performed. Geographical location of the tidal energy power station is obtained. Single installed capacity is determined to calculate maximum number of turbines. Number of turbines and the number of …	Q42 (Hydraulic engineering, soil shifting and sewerage (E02, 3)); ; T01 (Digital Computers); X11 (Power Generation and High Power Machines); X15 (Non-Fossil Fuel Power Generating Systems)	Q42-A03; Q54-X; T01-J05A2A; X11-B01; X15-C02; X15-C03	E02B-009/08; F03B-013/26; G06Q-050/06	CN111476680-A 31 Jul 2020 G06Q-050/06 202067 Pages: 15 Chinese	CN111476680-A CN10292028 14 Apr 2020	CN10292028 14 Apr 2020	DIIDW:202074397Y
283	P	CN110821744-A	Telescopic floating tidal energy generating device comprises four cylindrical floating bodies, platform slide, four horizontal shaft tidal energy generating devices, telescopic floating platform, central floating body, and telescopic rod.	MA J	UNIV JIANGSU SCI & TECHNOLOGY (UYJG-C)	202018069J	NOVELTY - A telescopic floating tidal energy generating device comprises telescopic floating platform and four horizontal shaft tidal energy generating devices. The telescopic floating platform comprises central floating body (100), four cylindrical floating bodies (110), platform slide (120), and telescopic rod (130). The central body is connected with four cylindrical floating bodies through th…	Q54 (Non-positive displacement fluid engines (i.e. driven by fluid); Miscellaneous motors and machines for producing mechanical power/thrust (F03B,D,G,H)); X15 (Non-Fossil Fuel Power Generating Systems)	Q54-A05; Q54-X; X15-C01A1; X15-C02	F03B-013/26; F03B-015/00; F03B-003/12; F03B-003/14	CN110821744-A 21 Feb 2020 F03B-013/26 202021 Pages: 6 Chinese	CN110821744-A CN11079489 07 Nov 2019	CN11079489 07 Nov 2019	DIIDW:202018069J
284	P	IN202211063872-A	System for harvesting renewable energy through tidal energy, has turbine that is mounted on stream-driven vehicle which is fixed to structure by wire, and swivel coupling that is provided to directly mount one of turbines to vehicle.	GUPTA A	UNIV GRAPHIC ERA HILL DEHRADUN CAMPUS (UYGR-Non-standard)	2022E6433T	NOVELTY - The system has a turbine that is mounted on a stream-driven vehicle. The stream-driven vehicle is fixed to a structure by a wire. A swivel coupling is provided to directly mount one of the turbines to the vehicle. The stream-driven vehicle is provided with steering mechanisms, and a control unit that is set up to send control signals to the steering mechanisms such that the vehicle is g…	Q42 (Hydraulic engineering, soil shifting and sewerage (E02, 3)); Q54 (Non-positive displacement fluid engines (i.e. driven by fluid); Miscellaneous motors and machines for producing mechanical power/thrust (F03B,D,G,H)); X15 (Non-Fossil Fuel Power Generating Systems)	Q42-A03; Q54-X; X15-C01; X15-C02	E02B-009/08; F03B-013/10; F03B-013/18; F03B-013/26; F03B-017/06	IN202211063872-A 18 Nov 2022 F03B-013/26 202200 Pages: 10 English	IN202211063872-A IN11063872 09 Nov 2022	IN11063872 09 Nov 2022	DIIDW:2022E6433T
285	P	CN107023030-A	Performance testing device for tidal energy elliptic pile foundation, involves main body provided with pile, ellipse whose long shaft is placed in same direction, and pile connected to doppler flow velocity instrument.	HE R	UNIV HOHAI (UYHO-C)	2017549401	NOVELTY - The device has a main body provided with a pile, where cross section of the pile is elliptic. A long shaft of the ellipse is placed in same direction. A top part of a tower frame is provided with a displacement sensor (8) and an acceleration sensor (9). A water surface is provided with a doppler flow meter. Pile is connected to a doppler flow velocity instrument (12) by multiple probes.…	Q42 (Hydraulic engineering, soil shifting and sewerage (E02, 3))	Q42-A10	E02D-027/12; E02D-027/52; E02D-033/00	CN107023030-A 08 Aug 2017 E02D-027/52 201765 Pages: 11 Chinese	CN107023030-A CN10200459 30 Mar 2017	CN10200459 30 Mar 2017	DIIDW:2017549401
286	P	CN221144651-U	Self-adaptive tidal energy generating device has control system that controls drive mechanism to adjust yaw angle of oscillating wing tidal energy power generation device based on incoming flow direction.	MO W	SHANDONG MARINE TECHNOLOGY RES INST (SHAN-Non-standard)	202465330K	NOVELTY - The invention claims a self-adaptive tidal energy generating device, comprising an oscillating wing tidal energy generating device integrated on a floating platform, a drive mechanism, a flow measuring unit, a brake device, a monitoring module and a control system; the flow measuring unit determines the flow direction through the direction sensor and the force sensor; the driving mechan…	Q54 (Non-positive displacement fluid engines (i.e. driven by fluid); Miscellaneous motors and machines for producing mechanical power/thrust (F03B,D,G,H)); X15 (Non-Fossil Fuel Power Generating Systems); X11 (Power Generation and High Power Machines)	Q54-X; X15-C01A1; X15-C02; X15-C03; X11-B01; X11-J05	F03B-011/00; F03B-013/00	CN221144651-U 14 Jun 2024 F03B-013/00 202451 Chinese	CN221144651-U CN22732665 12 Oct 2023	CN22732665 12 Oct 2023	DIIDW:202465330K
287	P	CN108361146-A; CN208396862-U	Semi-direct drive type tidal energy unit transmission chain of tidal power generating set, has gear box is semi-direct drive type gear box, and pitch mechanism that is mounted on wheel hub.	YUAN L	GUODIAN UNITED POWER TECHNOLOGY CO LTD (CGUO-C)	201862847P	NOVELTY - The semi-direct drive type tidal energy unit transmission chain has a hub (1), a gearbox (2), a gearbox (3), a generator (4) and a tail tank (5) which are connected in sequence. The hub and the gear box are connected by a main shaft and a dynamic seal (8) is arranged at the joint. The gear box is a semi-direct drive type gear box, and a pitch mechanism is mounted on the wheel hub. The p…	Q54 (Non-positive displacement fluid engines (i.e. driven by fluid); Miscellaneous motors and machines for producing mechanical power/thrust (F03B,D,G,H)); Q64 (Belts, chains, gearing (F16G,H)); X15 (Non-Fossil Fuel Power Generating Systems)	Q54-X; Q64-B01; Q64-C01L; X15-C02	F03B-011/00; F03B-013/26; F03B-015/00; F16H-057/04	CN108361146-A 03 Aug 2018 F03B-013/26 201855 Pages: 9 Chinese	CN108361146-A CN10345331 17 Apr 2018	CN10345331 17 Apr 2018	DIIDW:201862847P
288	P	CN104155128-A; CN104155128-B	Tide energy split open sea area experiment method, involves increasing tide isthmus channel area exit flow rate, and determining tide developed split open sea area flow rate according to change flow rate.	PAN C	ZHEJIANG INST HYDRAULICS & ESTUARY (ZIHE-C)	2015054968	NOVELTY - The method involves providing a tide isthmus channel area structure. An electric generator is fixed on a tide isthmus channel area. Inlet and outlet ends of the tide isthmus channel area are connected together. The tide isthmus channel area is provided with a flow speed measuring device. Inlet and outlet flow rates of the tide isthmus channel area are determined. Capacity of the electri…	S02 (Engineering Instrumentation)	S02-J09	G01M-099/00	CN104155128-A 19 Nov 2014 G01M-099/00 201505 Pages: 7 Chinese	CN104155128-A CN10322451 08 Jul 2014	CN10322451 08 Jul 2014	DIIDW:2015054968
289	P	KR2006008182-A	Operation tidal energy generator capable of generating electricity using tidal power.	SONG S N	SONG S N (SONG-Individual)	2006677171	NOVELTY - An operation tidal energy generator is provided to convert into electric energy after converting tidal power into kinetic energy to the maximum and to cope with the impact by floating materials.	Q54 (Non-positive displacement fluid engines (i.e. driven by fluid); Miscellaneous motors and machines for producing mechanical power/thrust (F03B,D,G,H))		F03B-013/26	KR2006008182-A 26 Jan 2006 F03B-013/26 200670	KR2006008182-A KR057885 23 Jul 2004	KR057885 23 Jul 2004	DIIDW:2006677171
290	P	US2002162326-A1; WO200290768-A1; US6574957-B2; EP1392972-A1; AU2002340747-A1; EP1392972-A4	Air compressing system using tidal energy for electricity generation, has compressed air storage tank between piston chamber and turbine, for supplying compressed air to turbine through air release valve.	BRUMFIELD D U	BRUMFIELD D U (BRUM-Individual)	2003174503	NOVELTY - A power transfer shaft (10) actuated by a float (14) on waves, is attached to a piston (24) through a lever arm (22). A compressed air storage tank (42) is provided between a piston chamber (32) and a turbine (46) for supplying compressed air to turbine through air release valve to cause power generation.	Q63 (Couplings; clutches; brakes; springs; dampers (F16D,F)); X15 (Non-Fossil Fuel Power Generating Systems); Q55 (Positive displacement fluid machines/pumps/compressors (i.e. for driving fluid) (F04B,C))	X15-C	F16D-031/02; F03C-001/00; F03B-013/24; F03B-013/26; F03B-013/18	US2002162326-A1 07 Nov 2002 F16D-031/02 200317 Pages: 13 English	US2002162326-A1 US138774 03 May 2002	US289003P 04 May 2001	DIIDW:2003174503
291	P	CN114909247-A	Adjustable-direction horizontal axis tidal energy water turbine generating device for use in power flow energy power generation technology field, has rotating seat that is installed with controller, and connects to speed detecting sensor.	SHI W	UNIV NANTONG (UYNT-C)	2022A9119U	NOVELTY - The device has a rotating seat (12), whose upper end is rotatably mounted with a machine frame (1) through a bearing. The rotating seat is fixedly installed with a driving motor. An output end of the driving motor is driven with a drive wheel. The machine frame is integrally formed with a gear ring (13) that is connected with the driving wheel. A limiting push rod (6) for limiting a rot…	Q54 (Non-positive displacement fluid engines (i.e. driven by fluid); Miscellaneous motors and machines for producing mechanical power/thrust (F03B,D,G,H)); X11 (Power Generation and High Power Machines); X15 (Non-Fossil Fuel Power Generating Systems)	Q54-X; Q54-A05; X11-B10; X11-B01; X15-C02; X15-C01	F03B-011/00; F03B-011/02; F03B-013/18; F03B-013/26; F03B-015/00; F03B-003/16	CN114909247-A 16 Aug 2022 F03B-013/18 202272 Chinese	CN114909247-A CN10657023 10 Jun 2022	CN10657023 10 Jun 2022	DIIDW:2022A9119U
292	P	CN109750645-A; CN209741790-U	Integrated wave energy and tide energy type breakwater generating device comprises a comb wave dike altitude system that an oscillating buoy power generation system and horizontal axis turbine generating system.	LI M	UNIV HARBIN ENGINEERING (UHEG-C)	201944456X	NOVELTY - The integrated wave energy and tide energy type breakwater generating device comprises a comb wave dike altitude system that an oscillating buoy power generation system and horizontal axis turbine generating system. The comb wave dike altitude system includes a rubble base. A caisson is arranged on the rubble base. The oscillating buoy power generation system is provided with a moon poo…	Q42 (Hydraulic engineering, soil shifting and sewerage (E02, 3))	Q42-A03; Q42-A10	E02B-003/06; E02B-009/08	CN109750645-A 14 May 2019 E02B-009/08 201940 Pages: 11 Chinese	CN109750645-A CN10163241 05 Mar 2019	CN10163241 05 Mar 2019	DIIDW:201944456X
293	P	CN107762714-A	Oscillation type hydrofoil tidal energy generating device, has rotating shaft whose lower end is provided with pump, and pump whose oil outlet is connected to hydraulic motor, where rotating shaft of motor is connected with generator.	HUANG T	UNIV ZHEJIANG OCEAN (UYZO-C)	201819906B	NOVELTY - The device has a bracket fixed on a seabed, where a center of the bracket is provided with a rotating shaft. The rotating shaft is provided with a cantilever that is fixed at an end of a rigid wave-shaped hydrofoil. The rigid wave-shaped hydrofoil swings and drives a rotating shaft through the cantilever when water flow hits a surface of the rigid wave-shaped hydrofoil. A lower end of t…	Q54 (Non-positive displacement fluid engines (i.e. driven by fluid); Miscellaneous motors and machines for producing mechanical power/thrust (F03B,D,G,H)); Q57 (Fluid-pressure actuators; hydraulic/pneumatics in general (F15)); X15 (Non-Fossil Fuel Power Generating Systems)	Q54-X; Q57-B; Q57-X; X15-C02	F03B-013/26; F15B-001/02; F15B-011/08	CN107762714-A 06 Mar 2018 F03B-013/26 201821 Pages: 9 Chinese	CN107762714-A CN10964435 17 Oct 2017	CN10964435 17 Oct 2017	DIIDW:201819906B
294	P	CN103573546-A; CN103573546-B	Method for using tide energy generating device, involves using impeller provided with eccentric upper shaft, using upper fixing frame connected with connecting rod, and using water outlet pipe provided with one-way valve.	CHEN Z	NINGBO ZHENHAI JIEDENG APPLIED TECHNOLOG (NING-Non-standard)	2014G50322	NOVELTY - The method involves using an upper part of a fixing frame connected with two set hydraulic water-lifting devices. The hydraulic water-lifting device is connected with a floating block. An upper shaft is provided with an impeller. The impeller is provided with an eccentric upper shaft. An upper fixing frame is connected with a connecting rod. A water outlet pipe is provided with a one-wa…	Q54 (Non-positive displacement fluid engines (i.e. driven by fluid); Miscellaneous motors and machines for producing mechanical power/thrust (F03B,D,G,H)); X15 (Non-Fossil Fuel Power Generating Systems)	X15-C02	F03B-013/26	CN103573546-A 12 Feb 2014 F03B-013/26 201426 Pages: 7 Chinese	CN103573546-A CN10258032 25 Jul 2012	CN10258032 25 Jul 2012	DIIDW:2014G50322
295	P	CN103726980-A	Tidal energy generating energy-storing device, has rolling shaft equipped with crank wheel that is equipped with first gear, and bracket leg fixed on dam, where first gear and second gear are connected with chain.	TANG Z	UNIV ZHEJIANG OCEAN (UYZO-C)	2014K97439	NOVELTY - The device has a roller (1) fixed on a steel frame (2) that is installed on a dam (10). The roller is equipped with a first gear (19). A steel plate (3) is provided with a notch (4). An end of a gravity floating body (6) is equipped with a fixed shaft (7) that is inserted into the notch. The gravity floating body is fixed on a first chain (5). A rolling shaft (15) is equipped with a cra…	Q54 (Non-positive displacement fluid engines (i.e. driven by fluid); Miscellaneous motors and machines for producing mechanical power/thrust (F03B,D,G,H)); X15 (Non-Fossil Fuel Power Generating Systems)	X15-C02	F03B-013/26	CN103726980-A 16 Apr 2014 F03B-013/26 201438 Pages: 7 Chinese	CN103726980-A CN10390799 16 Oct 2012	CN10390799 16 Oct 2012	DIIDW:2014K97439
296	P	CN103511171-A; CN103511171-B	Tide energy generating device, has controller connected with flow speed and flow direction sensor, and two brakes electrically connected, where one of brakes is located in input rotating shaft of outer rotor of generator.	LIN Y	UNIV ZHEJIANG (UYZH-C)	2014E80138	NOVELTY - The device has impellers (11, 12) located on an engine room (2) fixed on a tower frame (4). Ends of rotation shafts of the two impellers extend into the engine room. A brake (71) is located in an input rotating shaft of an inner rotor (31) of a generator (30). Another brake (72) is located in an input rotating shaft of an outer rotor (32) of the generator. A controller (6) is connected …	Q54 (Non-positive displacement fluid engines (i.e. driven by fluid); Miscellaneous motors and machines for producing mechanical power/thrust (F03B,D,G,H)); X15 (Non-Fossil Fuel Power Generating Systems)	X15-C02; X15-C03	F03B-013/26; F03B-015/00	CN103511171-A 15 Jan 2014 F03B-013/26 201420 Pages: 9 Chinese	CN103511171-A CN10469887 10 Oct 2013	CN10469887 10 Oct 2013	DIIDW:2014E80138
297	P	CN110848075-A; CN110848075-B	Near-coast wave energy and tidal energy combined power generation device has internal pressure seat that is provided in mounting base and with respect to dielectric elastomer power generating component which is set inside device outer frame.	QIN J	UNIV BOZHOU (UNBO-C)	2020198939	NOVELTY - The device has a generator (9) whose output shaft is provided with a rotating disc (10). A crank link (11) is mounted on the rear side of a rear floating plate (5). An end of the crank link far from the rear floating plate is connected with the rotating base of the rotating disc. A power rebound device (4) is provided with a device outer frame and a mounting base. A spring cavity is pro…	A88 (Mechanical engineering and tools e.g. valves, gears and conveyor belts.); Q54 (Non-positive displacement fluid engines (i.e. driven by fluid); Miscellaneous motors and machines for producing mechanical power/thrust (F03B,D,G,H)); X11 (Power Generation and High Power Machines); X15 (Non-Fossil Fuel Power Generating Systems)	A12-E08B; Q54-X; X11-B01; X15-C01; X15-C02	F03B-011/00; F03B-013/18; F03B-013/26	CN110848075-A 28 Feb 2020 F03B-013/18 202025 Pages: 9 Chinese	CN110848075-A CN11053826 31 Oct 2019	CN11053826 31 Oct 2019	DIIDW:2020198939
298	P	CN102116095-A	Method for designing house e.g. high lighting butterfly type house, involves providing tidal energy generating device to collect tidal energy through vertical point type floating barrel.	ZHANG Q	ZHANG Q (ZHAN-Individual)	2011K04200	NOVELTY - The method involves marking common block by red section line. The downstairs passageway is communicated, when hidden backup door is opened. The passage adjacent to dinning room and sitting room of balcony is connected to form indoor annular channel. Port of outdoor air and facility are independent with each other. An inclined wheel groove channel is provided on upstairs of car and downs…	Q46 (Building aids, special structures, ladders (E04G,H, E06C))		E04H-001/04	CN102116095-A 06 Jul 2011 E04H-001/04 201162 Pages: 16 Chinese	CN102116095-A CN10217312 31 Dec 2009	CN10217312 31 Dec 2009	DIIDW:2011K04200
299	P	WO2023223019-A1	Tidal energy system for generating electricity by using fossil fuels, has seaward storage basin for storing outgoing tidal water, and turbine provided between seaward storage basin and intermediate storage basin.	MURPHY S F	MURPHY S F (MURP-Individual)	2023C10800	NOVELTY - The system has an intermediate storage basin (20) located between seaward and landward storage basins (10, 30). The seaward storage basin receives and stores incoming tidal water and delivers water to the intermediate storage basin. The seaward storage basin stores outgoing tidal water from the intermediate storage basin and delivers water out of a tidal energy system to sea. A turbine …	Q42 (Hydraulic engineering, soil shifting and sewerage (E02, 3)); Q54 (Non-positive displacement fluid engines (i.e. driven by fluid); Miscellaneous motors and machines for producing mechanical power/thrust (F03B,D,G,H)); X15 (Non-Fossil Fuel Power Generating Systems)	Q42-A03; Q54-X; X15-C02	E02B-009/08; F03B-013/26	WO2023223019-A1 23 Nov 2023 F03B-013/26 202395 Pages: 33 English	WO2023223019-A1 WOGB051286 16 May 2023	GB007103 16 May 2022	DIIDW:2023C10800
300	P	CN220336998-U	Tidal energy power generation device, has generator cabin arranged at lower end of sub-cabin, where generator cabin is internally provided with generator set, and output shaft of propeller is connected with rotor of generator set.	ZHENG M	UNIV CHINA ELECTRONIC SCI & TECHNOLOGY (UEST-C)	202409740V	NOVELTY - The utility model claims a tidal energy generating device, comprising a floating device, a direction adjusting vertical wing, a connecting rod, a sub-cabin, a generating cabin and a propeller; the direction-adjusting vertical wing is vertical plate-shaped and is fixed at the bottom of the floating device; two sub-cabins are set and symmetrically located at two sides of the floating devi…	Q54 (Non-positive displacement fluid engines (i.e. driven by fluid); Miscellaneous motors and machines for producing mechanical power/thrust (F03B,D,G,H)); X15 (Non-Fossil Fuel Power Generating Systems); X11 (Power Generation and High Power Machines)	Q54-A05; Q54-X; X15-C02; X11-B01; X11-J05	F03B-011/00; F03B-013/26; F03B-003/12	CN220336998-U 12 Jan 2024 F03B-013/26 202409 Chinese	CN220336998-U CN21609978 25 Jun 2023	CN21609978 25 Jun 2023	DIIDW:202409740V
301	P	CN213808848-U	Combined sealing device for tide energy generating device, has outer bushing sleeved on shaft, and spring arranged between side of end face of inner bushing and shell, where framework sealing structure adopts lip-shaped framework sealing piece.	JI Q	NANJING HIGH ACCURATE MARINE EQUIP CO LT (NANJ-Non-standard)	2021887538	NOVELTY - The utility model belongs to power flow energy generating device technology field, specifically relates to a combined sealing device for tide energy generating device, comprising an outer bushing, the outer bushing is sleeved on the shaft, and the outer bushing is fixedly connected with the shaft, the outer bushing is sleeved with several wearable rings; several wearable rings are sleev…	Q54 (Non-positive displacement fluid engines (i.e. driven by fluid); Miscellaneous motors and machines for producing mechanical power/thrust (F03B,D,G,H)); Q65 (Pistons, cylinders, packing (F16J)); S02 (Engineering Instrumentation); X15 (Non-Fossil Fuel Power Generating Systems)	Q54-X; Q65-D; S02-C06; X15-C02; X15-C03	F16J-015/16; F03B-013/26; G01F-023/00	CN213808848-U 27 Jul 2021 F16J-015/16 202163 Pages: 7 Chinese	CN213808848-U CN21872844 01 Sep 2020	CN21872844 01 Sep 2020	DIIDW:2021887538
302	P	GB2527817-A; WO2016001623-A1; GB2527817-B; CA2953882-A1; KR2017028329-A; CN106574598-A; EP3164594-A1; US2017342957-A1; ID201713910-A	Single pile support structure i.e. monopile for use in rivers or estuaries for tidal energy converter system, has support frame extending attached to stanchion, and operated to anchor support system to seabed.	BALDOCK A	ENERGY TECHNOLOGIES INST LLP (ENER-Non-standard)	2016017263	NOVELTY - The structure (14) has a stanchion (4) extending in first direction. A cross arm (5) extends in second direction perpendicular or perpendicular to the first direction. The cross arm is statically attached to the stanchion and operated to support a set of tidal energy converters. The support frame is extended in third direction perpendicular or perpendicular to the first and second direc…	Q54 (Non-positive displacement fluid engines (i.e. driven by fluid); Miscellaneous motors and machines for producing mechanical power/thrust (F03B,D,G,H)); X15 (Non-Fossil Fuel Power Generating Systems)	Q54-X; X15-C02	F03B-013/26; F03B-013/10; F03B-017/06; E02B-009/06; E02B-009/08; E02D-029/02	GB2527817-A 06 Jan 2016 F03B-013/26 201604 Pages: 35 English	GB2527817-A GB011872 02 Jul 2014	GB011872 02 Jul 2014	DIIDW:2016017263
303	P	CN102980264-A	Central air conditioner ocean tidal energy driving device for use in coastal area factories, has large floating body connected with center part of supporting frame that is installed on large ocean tidal energy driving unit.	LI H	LI H (LIHH-Individual)	2013K39801	NOVELTY - The device has a large floating body fixed on an upper part of a large cylinder sleeve. A cylinder is fixed with a top part of a large piston and the large cylinder sleeve. A top end of the large piston is connected with a heat preservation pipeline. A water outlet of a heat exchanger is connected with an upper part of a water valve and a water pipe. A water conveying pipe is connected …	Q74 (Heating, ranges, ventilating (F24))		F24F-005/00	CN102980264-A 20 Mar 2013 F24F-005/00 201347 Pages: 4 Chinese	CN102980264-A CN10564128 24 Dec 2012	CN10564128 24 Dec 2012	DIIDW:2013K39801
304	P	GB2577340-A; GB2577340-B	Tidal energy-harvesting unit for producing electricity at a predetermined voltage, comprises a chamber to let sea water enter and exit the chamber, where generator is powered by rotor or turbine to provide electricity.	LAWRIE A	LAWRIE A (LAWR-Individual)	202023044C	NOVELTY - The tidal energy-harvesting unit (10) comprises a chamber (20) built into the face of a sea cliff, having aperture (40) along the lower edge of seaward side to let sea water enter and exit the chamber. The camber is provided with an opening at an upper portion. A turbine (50) is connected with the opening (80) and is driven by air displaced or drawn in by water. A generator (60) is powe…	Q54 (Non-positive displacement fluid engines (i.e. driven by fluid); Miscellaneous motors and machines for producing mechanical power/thrust (F03B,D,G,H)); X15 (Non-Fossil Fuel Power Generating Systems)	Q54-G; Q54-X; X15-B01A; X15-B01B; X15-C02	F03B-013/26; F03D-009/00	GB2577340-A 25 Mar 2020 F03B-013/26 202029 Pages: 24 English	GB2577340-A GB015562 24 Sep 2018	GB015562 24 Sep 2018	DIIDW:202023044C
305	P	CN112600209-A	Tidal energy containing sea-island independent microgrid capacity multi-target optimization configuring method, involves setting optimization target and constraint, and determining coordination scheme of each optimization priority order.	ZHAO G	UNIV HUBEI TECHNOLOGY (UYHI-C)	202136167L	NOVELTY - The method involves establishing an independent sea island mixed energy micro-grid model. An optimization target and a constraint are set. A coordination scheme of each optimization target priority order is determined. A photovoltaic power generation array model is established. An actual output power of a photovoltaic array is calculated from an output power, a light intensity and ambie…	X12 (Power Distribution/Components/Converters)	X12-H01A1A; X12-H01A7; X12-H01B	H02J-003/06; H02J-003/14; H02J-003/32; H02J-003/38; H02J-003/46	CN112600209-A 02 Apr 2021 H02J-003/06 202135 Pages: 22 Chinese	CN112600209-A CN11458863 11 Dec 2020	CN11458863 11 Dec 2020	DIIDW:202136167L
306	P	WO2019086877-A1; CA3081621-A1; EP3704372-A1; KR2020116903-A; JP2021508017-W	Apparatus for installing energy converting array of turbine at offshore marine, has energy converting array that includes support structure and tidal energy converter modules mounted to support structure.	PARKINSON R J	INYANGA-TECH LTD (INYA-Non-standard)	2019405987	NOVELTY - The apparatus has an energy converting array that includes a support structure (4) and tidal energy converter modules (6) mounted to the support structure. Each module includes energy converter device. The arrangement is provided, such that the tidal energy converter modules are mounted to the support structure in a staggered arrangement, with each module separated horizontally and vert…	Q54 (Non-positive displacement fluid engines (i.e. driven by fluid); Miscellaneous motors and machines for producing mechanical power/thrust (F03B,D,G,H)); X15 (Non-Fossil Fuel Power Generating Systems)	Q54-X; X15-C01B2; X15-C02	F03B-013/26; F03B-013/10	WO2019086877-A1 09 May 2019 F03B-013/26 201938 Pages: 25 English	WO2019086877-A1 WOGB053164 01 Nov 2018	GB018193 02 Nov 2017	DIIDW:2019405987
307	P	ES2400147-A2; ES2400147-B1	Device for utilizing tidal energy, comprises floating platform, which is arranged on sea level, and pneumatic or hydraulic cylinder is arranged vertically with bottom and fixed to seabed, where cylinder is accommodated at top.	FERNANDEZ FERNANDEZ A	FERNANDEZ FERNANDEZ A (FERN-Individual)	2013L51410	NOVELTY - The device comprises a floating platform (12), which is arranged on sea level (13). A pneumatic or hydraulic cylinder (1) is arranged vertically with a bottom (3) and fixed to seabed (2). The cylinder is accommodated at top (4), where the cylinder comprises a lower chamber (5), which is arranged on the bottom. An upper chamber (6) is arranged at the top, where the lower chamber and the …	Q54 (Non-positive displacement fluid engines (i.e. driven by fluid); Miscellaneous motors and machines for producing mechanical power/thrust (F03B,D,G,H)); X15 (Non-Fossil Fuel Power Generating Systems)	X15-C01A1; X15-C02	F03B-013/18; F03B-013/26	ES2400147-A2 05 Apr 2013 F03B-013/26 201348 Pages: 6 Spanish	ES2400147-A2 ES031397 18 Aug 2011	ES031397 18 Aug 2011	DIIDW:2013L51410
308	P	CN203614316-U	Box-type tide energy generating device, has box body connected with water inlet that is fixed with generator, and water outlet fixed at bottom of side wall of box body through gate and arranged with water turbine of rotary wheel.	HUANG M	UNIV DALIAN OCEAN (UNDO-C)	2014N81694	NOVELTY - This utility new type at one claims a box type tide energy generating device, comprise box body (1), wherein the upper box body (1) is provided with a box body (1) connected with the inner cavity of the water inlet (2), water inlet (2) is set with a generator (3) of the box body (1) side of the bottom wall is further set with a through gate (4) of a water outlet (5), discharging water (…	Q54 (Non-positive displacement fluid engines (i.e. driven by fluid); Miscellaneous motors and machines for producing mechanical power/thrust (F03B,D,G,H)); X15 (Non-Fossil Fuel Power Generating Systems)	X15-C02	F03B-013/26	CN203614316-U 28 May 2014 F03B-013/26 201449 Pages: 5 Chinese	CN203614316-U CN20713112 13 Nov 2013	CN20713112 13 Nov 2013	DIIDW:2014N81694
309	P	AU2017101256-A4	Energy harvesting apparatus for harvesting wave or tidal energy, has second case coupled to first case adapted for harnessing wave or tidal energy by relative movements of first and second case.	ZHANG C	CL SCI PTY LTD (CLSC-Non-standard)	201772176U	NOVELTY - The apparatus (100) has a first case (101) adapted for being a float in a water. A second case (102) is coupled to the first case adapted for harnessing the wave or tidal energy by relative movements of the first and second case. The apparatus is adapted to extract the energy from movement of the water to produce electrical power. Two generators are adapted to generate electrical power.…	Q42 (Hydraulic engineering, soil shifting and sewerage (E02, 3)); Q54 (Non-positive displacement fluid engines (i.e. driven by fluid); Miscellaneous motors and machines for producing mechanical power/thrust (F03B,D,G,H)); X15 (Non-Fossil Fuel Power Generating Systems)	Q42-A03; Q54-X; X15-C01; X15-C02	E02B-009/08; F03B-013/12	AU2017101256-A4 19 Oct 2017 F03B-013/12 201772 Pages: 26 English	AU2017101256-A4 AU101256 14 Sep 2017	AU101256 14 Sep 2017	DIIDW:201772176U
310	P	CN104763581-A; CN104763581-B	Tide energy power generation unit, has tide energy hydraulic unit whose lower part is fixedly connected with upper part and yaw system, where yaw system is installed on upper part of ocean platform by yaw bracket support.	CHENG Q	GUODIAN UNITED POWER TECHNOLOGY CO LTD (CGUO-C)	201553146S	NOVELTY - The unit has a floating type ocean platform provided with an upper lifting tide hole, and a main supporting frame provided with a through hole. A lower part of a tide energy hydraulic unit is fixedly connected with an upper part and a yaw system. The yaw system is installed on an upper part of the ocean platform by a yaw bracket support. An upper supporting platform is provided with a m…	Q54 (Non-positive displacement fluid engines (i.e. driven by fluid); Miscellaneous motors and machines for producing mechanical power/thrust (F03B,D,G,H)); X11 (Power Generation and High Power Machines); X15 (Non-Fossil Fuel Power Generating Systems)	X11-B10; X15-C02	F03B-013/26; F03B-015/00	CN104763581-A 08 Jul 2015 F03B-013/26 201565 Pages: 7 Chinese	CN104763581-A CN10155651 02 Apr 2015	CN10155651 02 Apr 2015	DIIDW:201553146S
311	P	CN104408260-A; CN104408260-B	Tide energy turbine blade airfoil design method involves establishing water wing type mesh model for calculating water power performance.	REN Y	UNIV HUNAN (UYHU-C)	2015266669	NOVELTY - The method involves establishing water wing type optimization model. The resistance coefficient under the random angle condition is set. The surface type control point cross coordinate and wing surface control point longitudinal coordinate are calculated. The water wing type mesh model is established for calculating a water power performance. The calculation target function and fitness …	T01 (Digital Computers)	T01-J15X; T01-J16C4; T01-J30D	G06F-017/50	CN104408260-A 11 Mar 2015 G06F-017/50 201534 Pages: 17 Chinese	CN104408260-A CN10729327 04 Dec 2014	CN10729327 04 Dec 2014	DIIDW:2015266669
312	P	CN112761855-A	Structure for generating electricity by using seawater tidal energy, has floating generating device provided with hollow floating devices and generator, where hollow floating device is uniformly fixed at outer side of generator.	ZHANG X	CCCC FHDI ENG CO LTD (CCCC-C)	202154088R	NOVELTY - The structure has a generating device fixing device fixed on a seabed. A floating generating device floats on a sea level. A cable connects the floating generating device. Two ends of the cable are connected to the generating device fixing device. The floating generating device comprises multiple fan-shaped hollow floating devices and a generator. The fan-shaped hollow floating device i…	Q54 (Non-positive displacement fluid engines (i.e. driven by fluid); Miscellaneous motors and machines for producing mechanical power/thrust (F03B,D,G,H)); X12 (Power Distribution/Components/Converters); X15 (Non-Fossil Fuel Power Generating Systems)	Q54-X; X12-D03A2; X15-C02	F03B-013/26; H01B-007/06	CN112761855-A 07 May 2021 F03B-013/26 202146 Pages: 12 Chinese	CN112761855-A CN10098801 25 Jan 2021	CN10098801 25 Jan 2021	DIIDW:202154088R
313	P	CN110453721-A; CN210766860-U	Tide energy turbine single-pile supporting base, has pile foundation whose end is connected with supporting ring that is provided with slideway structure, and tide energy turbine connected with base.	WU X	UNIV SHANGHAI JIAOTONG (USJT-C)	201997978U	NOVELTY - The base has a support structure formed with a pile foundation. A bottom part of the pile foundation is fixed with a sea bed. A top part of the pile foundation is fixed at a lower part of a sea. An end of the support structure is fixed with a lateral supporting arm. The lateral support arm is connected with an outer side of the pile foundation. An end of the pile foundation is connected…	Q42 (Hydraulic engineering, soil shifting and sewerage (E02, 3))	Q42-A03; Q42-A10	E02B-009/08; E02D-027/16; E02D-027/44; E02D-027/52	CN110453721-A 15 Nov 2019 E02D-027/44 201992 Pages: 6 Chinese	CN110453721-A CN10837035 05 Sep 2019	CN10837035 05 Sep 2019	DIIDW:201997978U
314	P	CN109611262-A; CN109611262-B	Device for converting tidal energy of sand near shore to wave energy, has inner column connected with traction spring to compress traction spring along anticlockwise or clockwise rotating direction of rotating center rod and driving gear.	ZHENG L	UNIV YANSHAN (UYAN-C)	201935744M	NOVELTY - The device has a rotating center rod connected with a driving gear to rotate counterclockwise direction. A sliding contact is arranged with an outer column that is connected with a traction spring to compress the traction spring when the rotating center rod and the driving gear rotate clockwise direction. The sliding contact is connected with an inner column that is connected with the t…	Q54 (Non-positive displacement fluid engines (i.e. driven by fluid); Miscellaneous motors and machines for producing mechanical power/thrust (F03B,D,G,H)); X15 (Non-Fossil Fuel Power Generating Systems)	Q54-X; X15-C01; X15-C02	F03B-011/08; F03B-013/22; F03B-013/26	CN109611262-A 12 Apr 2019 F03B-013/26 201946 Pages: 12 Chinese	CN109611262-A CN11618207 28 Dec 2018	CN11618207 28 Dec 2018	DIIDW:201935744M
315	P	CN117514581-A	Device for collecting ocean tide energy based on cylindrical fluid theory, has fixed rudder connected to outer wall of cylinder body, where side of cylinder body far away from rudder is provided with main flow passage, and main passage and first cavity are directly provided with branch passage.	WANG H	WANG H (WANG-Individual)	202417552N	NOVELTY - The device has a tide energy collector comprising a rotatable rotating shaft, and a first cavity (4) internally installed with the rotatable rotating shaft. An outer wall of the rotating shaft is fixed with blades (9). The rotating shaft is connected with a power generation device through a transmission mechanism. A fixed rudder (10) is fixedly connected to an outer wall of a cylinder b…	Q54 (Non-positive displacement fluid engines (i.e. driven by fluid); Miscellaneous motors and machines for producing mechanical power/thrust (F03B,D,G,H)); V06 (Electromechanical Transducers and Small Machines); X15 (Non-Fossil Fuel Power Generating Systems); X11 (Power Generation and High Power Machines)	Q54-A05; Q54-X; V06-M10; X15-C02; X11-B01; X11-B10; X11-J05B	F03B-013/26; F03B-015/00; F03B-003/00; F03B-003/12; F03B-003/18; H02K-007/18	CN117514581-A 06 Feb 2024 F03B-013/26 202417 Chinese	CN117514581-A CN11802407 26 Dec 2023	CN11802407 26 Dec 2023	DIIDW:202417552N
316	P	CN112761857-A; CN215109261-U	Timing descending tidal energy collection device operating in floating bucket tower, has brake that is connected to timing switch and power supply through wires, and fixed pulley which is fixed on support which is fixed on cover of tower.	ZHANG W	ZHANG W (ZHAN-Individual)	202154024Y	NOVELTY - The device has a main shaft (15) that is connected to a support (12) by a bearing, and the support is fixed on a tower top cover (9). A brake is connected to a timing switch and a power supply through wires. A fixed pulley (14) is fixed on the support, and the support is fixed on the top cover of the tower. The water level inside and outside a working tower (5) is the same through the c…	Q54 (Non-positive displacement fluid engines (i.e. driven by fluid); Miscellaneous motors and machines for producing mechanical power/thrust (F03B,D,G,H)); X15 (Non-Fossil Fuel Power Generating Systems)	Q54-X; X15-C02	F03B-011/00; F03B-013/26	CN112761857-A 07 May 2021 F03B-013/26 202145 Pages: 6 Chinese	CN112761857-A CN10242546 23 Feb 2021	CN10242546 23 Feb 2021	DIIDW:202154024Y
317	P	CN115199463-A	Tide energy utilization device for loading and unloading, has supporting structure for fixing installed between mounting ring and generator, and driving mechanism for providing power arranged between two sleeve screw threads.	WEI P	WEI P (WEIP-Individual)	2022D3587M	NOVELTY - The device has two L-shaped rods (5) whose lower portions are rotatably connected with a screw thread sleeve wheel through screw thread. A bottom portion of the two screw thread sleeves are connected with a lifting pushing frame. A lower portion of two pushing frames are slidingly provided with a spiral sleeve. An outer side of a lower portion of two spiral sleeves are hinged with three…	Q54 (Non-positive displacement fluid engines (i.e. driven by fluid); Miscellaneous motors and machines for producing mechanical power/thrust (F03B,D,G,H)); X15 (Non-Fossil Fuel Power Generating Systems)	Q54-X; X15-C02	F03B-011/00; F03B-013/26	CN115199463-A 18 Oct 2022 F03B-013/26 202288 Chinese	CN115199463-A CN10864656 21 Jul 2022	CN10864656 21 Jul 2022	DIIDW:2022D3587M
318	P	CN108252866-A; CN207960842-U; WO2019169741-A1; US2020208611-A1	Floating-type blower and tidal energy device based deep-sea energy integrated system, has blade connected with cylindrical shaft structure, and supporting frame structure connected with external structure through transmission structure.	SHI W	UNIV DALIAN TECHNOLOGY (UYDA-C)	201855293J	NOVELTY - The system has two fans (1) connected with a tower barrel (4) through an arrow type bracket (3). Each fan is connected with a spar platform (5) through a lifting rope (2). Three mooring lines (6) are fixed on a sea bed. A tide energy generator (7) i.e. vertical shaft tidal power generator is fixed in a bottom part of the spar platform. Three blades are fixed on a connecting port of expa…	Q54 (Non-positive displacement fluid engines (i.e. driven by fluid); Miscellaneous motors and machines for producing mechanical power/thrust (F03B,D,G,H)); X15 (Non-Fossil Fuel Power Generating Systems)	Q54-G; Q54-X; X15-B01B; X15-C02	F03B-013/26; F03D-001/02; F03D-013/25; F03D-009/25; F03D-009/00	CN108252866-A 06 Jul 2018 F03D-009/25 201851 Pages: 7 Chinese	CN108252866-A CN10211962 06 Mar 2018	CN10211962 06 Mar 2018	DIIDW:201855293J
319	P	CN104100447-A	Floating type combination tide energy generating unit, has multi-generator set comprising multi-floating body, and center body fixedly connected with support body, where multiple sections of support body are connected with universal joint.	DAI H	GUODIAN UNITED POWER TECHNOLOGY CO LTD (CGUO-C)	2015014131	NOVELTY - The unit has a multi-generator set comprising a multi-floating body. A center body is fixedly connected with a support body, where multiple sections of the support body are connected with a universal joint. A flange is fixed to a bolt, and a multi-chamber is connected with the multi-floating body.	Q54 (Non-positive displacement fluid engines (i.e. driven by fluid); Miscellaneous motors and machines for producing mechanical power/thrust (F03B,D,G,H)); X15 (Non-Fossil Fuel Power Generating Systems)	X15-C02	F03B-013/26	CN104100447-A 15 Oct 2014 F03B-013/26 201503 Pages: 6 Chinese	CN104100447-A CN10366693 29 Jul 2014	CN10366693 29 Jul 2014	DIIDW:2015014131
320	P	CN204003238-U	Ocean tide energy generation lubricating blade bearing system, has blade shaft sleeved with wheel hub through radial bearing, thrust ring sleeved with blade shaft, and locking nut sleeved with blade shaft.	HOU X	DONGFANG ELECTRIC CORP DONGFANG ELECTRIC (DFEC-C)	201507456K	NOVELTY - A one used for ocean tide energy generation from lubricating blade bearing system is set, belonging to tide energy generation device technology field, through radial blade shaft sleeved b wheel hub inner bearing, a radial bearing is from lubricating radial bearing. A shaft outside bearing and inner bearing used for bearing axial direction of load, is from lubricating bearing. Blade shaf…	Q54 (Non-positive displacement fluid engines (i.e. driven by fluid); Miscellaneous motors and machines for producing mechanical power/thrust (F03B,D,G,H))		F03B-011/00; F03B-011/06	CN204003238-U 10 Dec 2014 F03B-011/06 201509 Pages: 7 Chinese	CN204003238-U CN20373931 08 Jul 2014	CN20373931 08 Jul 2014	DIIDW:201507456K
321	P	CN109441705-A; CN109441705-B	Ocean tide energy generating set fixed supporting structure design method, involves obtaining energy generating set fixed supporting structure when working condition analysis result satisfies ocean tide energy generating design requirements.	YUAN L	GUODIAN UNITED POWER TECHNOLOGY CO LTD (CGUO-C)	201924807T	NOVELTY - The method involves determining sea conditions of a tidal power generating set to obtain a machine set corrosive running data in water, ocean current speed and direction. Tidal power generating operation working condition of the machine set is determined to calculate machine set starting time. Design of a blade airfoil is determined to calculate structure size and hydrodynamic load of t…	Q54 (Non-positive displacement fluid engines (i.e. driven by fluid); Miscellaneous motors and machines for producing mechanical power/thrust (F03B,D,G,H)); T01 (Digital Computers); X15 (Non-Fossil Fuel Power Generating Systems)	Q54-X; T01-J15X; X15-C02; X15-C03	F03B-011/00; F03B-013/26; G06F-017/50; G06F-030/20	CN109441705-A 08 Mar 2019 F03B-013/26 201937 Pages: 9 Chinese	CN109441705-A CN11552230 19 Dec 2018	CN11552230 19 Dec 2018	DIIDW:201924807T
322	P	CN113123919-A	Tidal energy generator has machine body fixedly mounted with guide sleeve through fixing rod, front surface of rotating blade movably mounted with cleaning mechanism, and center part of turntable movably mounted with transmission mechanism.	YANG W	YANG W (YANG-Individual)	202183870P	NOVELTY - The generator has a machine body (1) whose lower end is fixedly mounted with a guide sleeve (2) through a fixing rod. The front surface of guide sleeve is rotatably mounted with a turntable through a rotation axis. The outer side of turntable is fixedly installed with a rotating blade (3). The front surface of rotating blade is movably mounted with a cleaning mechanism. The center part …	Q54 (Non-positive displacement fluid engines (i.e. driven by fluid); Miscellaneous motors and machines for producing mechanical power/thrust (F03B,D,G,H)); X15 (Non-Fossil Fuel Power Generating Systems)	Q54-X; X15-C02	F03B-013/26; F03B-011/00	CN113123919-A 16 Jul 2021 F03B-013/26 202164 Pages: 11 Chinese	CN113123919-A CN10534542 17 May 2021	CN10534542 17 May 2021	DIIDW:202183870P
323	P	CN109899219-A	Tidal energy conversion system, has shield hinged with base, and transducer coupled to shield for converting tidal pressure exerted on shield into electric energy, where shield provided with first surface and second surface.	LAI Y	JIANGHUA SHENGRUI ELECTRONIC CO LTD (JIAN-Non-standard)	201956248Q	NOVELTY - The system has a shield hinged with a base. A transducer is coupled to the shield for converting tidal pressure exerted on the shield into electric energy. The shield comprises a first surface that blocks average traveling direction of water wave, where the first surface is formed as a concave shaped structure. The shield is provided with a second surface opposite to the first surface, …	Q54 (Non-positive displacement fluid engines (i.e. driven by fluid); Miscellaneous motors and machines for producing mechanical power/thrust (F03B,D,G,H)); X15 (Non-Fossil Fuel Power Generating Systems)	Q54-X; X15-C01; X15-C02	F03B-013/26; F03B-013/14	CN109899219-A 18 Jun 2019 F03B-013/26 201960 Pages: 5 Chinese	CN109899219-A CN11298306 08 Dec 2017	CN11298306 08 Dec 2017	DIIDW:201956248Q
324	P	CN108180103-A	Adjustable vertical shaft tide-energy turbine, has generator internally provided with controller that is connected with adjustable paddle device, where vertical generator is electrically connected with adjustable paddle device.	LI L	LI L (LILL-Individual)	201850327N	NOVELTY - The turbine has a generator (1) fixedly equipped with a fixing soleplate device, where the generator is made of composite material. The generator is provided with a convex mounting plate. An end of a horizontal telescopic sleeve (15) is fixed with a telescopic blade (16). An elastic rubber plate (17) is fixed at a bottom of the telescopic blade. A fixed rib (18) is installed on a surfac…	A88 (Mechanical engineering and tools e.g. valves, gears and conveyor belts.); Q54 (Non-positive displacement fluid engines (i.e. driven by fluid); Miscellaneous motors and machines for producing mechanical power/thrust (F03B,D,G,H)); X15 (Non-Fossil Fuel Power Generating Systems)	A12-H; Q54-A05; Q54-X; X15-C02	F03B-013/26; F03B-003/14	CN108180103-A 19 Jun 2018 F03B-013/26 201847 Pages: 10 Chinese	CN108180103-A CN10043183 17 Jan 2018	CN10043183 17 Jan 2018	DIIDW:201850327N
325	P	CN202157897-U	Tide energy generating device, has winding drum fixed in pulley, and over speed clutch connected with end of torsion spring, where end of winding drum is connected to generator and another end of torsion spring is fixed on base.	HUANG D	SHAOXING ARTS & SCI ACAD (UNSX-C)	2012D34346	NOVELTY - The device has a generator (5) installed at a river side of a seaside platform. A water surface floating box (2) is arranged in the generator. An end of a rope (3) is connected with the water surface floating box. A winding drum (6) is fixed in a pulley (4). An end of the winding drum is connected to the generator. An over speed clutch (8) is connected with an end of a torsion spring (7…	Q54 (Non-positive displacement fluid engines (i.e. driven by fluid); Miscellaneous motors and machines for producing mechanical power/thrust (F03B,D,G,H)); X15 (Non-Fossil Fuel Power Generating Systems)	X15-C02	F03B-013/26	CN202157897-U 07 Mar 2012 F03B-013/26 201222 Pages: 5 Chinese	CN202157897-U CN20214635 23 Jun 2011	CN20214635 23 Jun 2011	DIIDW:2012D34346
326	P	WO2023204765-A1	Turbine device for harvesting tidal energy from water currents, has first and second concave areas that rotate turbine blade in first and second rotational directions with respect to reference vector in response to water currents.	NARASIMALU S	UNIV NANYANG TECHNOLOGICAL (UYTU-C)	2023B0630K	NOVELTY - The device (200) has a first end curving placed away from a turbine body (210) and in a first rotational direction with respect to a reference vector (212). A second end curving is placed away from the turbine body and in a second rotational direction with respect to the reference vector. A first concave area (232) rotates a turbine blade (220) in the second rotational direction with re…	Q42 (Hydraulic engineering, soil shifting and sewerage (E02, 3)); ; T01 (Digital Computers); X15 (Non-Fossil Fuel Power Generating Systems); X25 (Industrial Electric Equipment)	Q42-A03; Q54-A05; Q54-X; T01-J07B; T01-S03; X15-C02B; X25-A08A; X25-A08B	E02B-009/08; F03B-013/26; F03B-003/12	WO2023204765-A1 26 Oct 2023 F03B-013/26 202388 Pages: 48 English	WO2023204765-A1 WOSG050262 19 Apr 2023	SG10004221 22 Apr 2022	DIIDW:2023B0630K
327	P	CN103089516-A	Bidirectional blade integrated horizontal shaft for tidal energy current generator, has blade provided with working surface, where cross section of blade is provided with upper and lower parts that are provided with wings.	SHI W	QINGDAO HAISIZHUANG IRON TOWER CO LTD (QING-Non-standard)	2013Q40561	NOVELTY - The shaft has a blade provided with a working surface. A cross section of the blade is provided with upper and lower parts, which are provided with wings that are centrally symmetrical in shape. The working surface of the blade is extended toward an incoming and reverse flow of water.	Q54 (Non-positive displacement fluid engines (i.e. driven by fluid); Miscellaneous motors and machines for producing mechanical power/thrust (F03B,D,G,H))		F03B-003/12	CN103089516-A 08 May 2013 F03B-003/12 201366 Pages: 5 Chinese	CN103089516-A CN10573371 26 Dec 2012	CN10573371 26 Dec 2012	DIIDW:2013Q40561
328	P	CN113417785-A; CN214998002-U	Reversing mechanism integrated tidal energy water turbine experiment device, has hub provided with three blades, cabin shell whose side is provided with main wing, and auxiliary wing fixedly connected with cabin shell.	SUN C	CHINA THREE GORGES CORP (CTGC-C)	2021B2349X	NOVELTY - The device has a main body structure installed in an experiment water tank, rotatably arranged on a top unit of a strut and provided with a hub and a cabin shell. The cabin shell is rotatably provided with a rotating shaft through a bearing along length direction. A front end of the rotating shaft is extended out of a cabin shell body. The hub is provided with three blades. A side of th…	Q54 (Non-positive displacement fluid engines (i.e. driven by fluid); Miscellaneous motors and machines for producing mechanical power/thrust (F03B,D,G,H))	Q54-X	F03B-011/00	CN113417785-A 21 Sep 2021 F03B-011/00 202181 Pages: 8 Chinese	CN113417785-A CN10429486 21 Apr 2021	CN10429486 21 Apr 2021	DIIDW:2021B2349X
329	P	CN105986957-A	Sea-water circulating tidal energy conveying system, has filter connected between water pump and water absorbing device, adjusting device for adjusting water flow condition, and output unit connected with energy storage unit.	GUO Y	FUJIAN QUANZHOU HAISI SHIP EVALUATION CO (FUJI-Non-standard)	201664633P	NOVELTY - The system has a turbine for converting tidal water energy into mechanical energy. A generating unit converts the mechanical energy into electric energy. The electric energy is transmitted to a conveying unit. A rectifying unit rectifies electric energy. The electric energy is stored in energy storage unit after performing rectification process. The conveying unit circularly conveys sea…	P14 (Animal management and care (A01K, L, M).); Q42 (Hydraulic engineering, soil shifting and sewerage (E02, 3)); Q54 (Non-positive displacement fluid engines (i.e. driven by fluid); Miscellaneous motors and machines for producing mechanical power/thrust (F03B,D,G,H)); Q55 (Positive displacement fluid machines/pumps/compressors (i.e. for driving fluid) (F04B,C)); X15 (Non-Fossil Fuel Power Genera…	P14-B02; P14-E01C; Q42-D; Q54-X; Q55-A; X15-C02	A01K-061/00; E03B-001/02; F03B-013/26; F04B-023/00	CN105986957-A 05 Oct 2016 F03B-013/26 201681 Pages: 6 Chinese	CN105986957-A CN10069645 05 Feb 2015	CN10069645 05 Feb 2015	DIIDW:201664633P
330	P	CN102777314-A; CN102777314-B	Axis flow direct current tide energy generating device, has generator connected with output shaft of outer gear ring, where ratio between gear ring and small gear is in specific range.	CHEN J	UNIV ZHEJIANG NINGBO TECHNOLOGY INST (NBLG-C)	2013C36848	NOVELTY - The device has an impeller device unit rotatably connected with a mounting bracket. A generator (4) is fixedly connected with the mounting bracket and the impeller device unit. An upper part of the impeller device unit is provided with an outer gear ring (6). The generator is connected with an output shaft of the outer gear ring. Ratio between the outer gear ring and a small gear (5) is…	Q54 (Non-positive displacement fluid engines (i.e. driven by fluid); Miscellaneous motors and machines for producing mechanical power/thrust (F03B,D,G,H)); X15 (Non-Fossil Fuel Power Generating Systems)	X15-C02	F03B-013/26; F03B-003/04	CN102777314-A 14 Nov 2012 F03B-013/26 201316 Pages: 9 Chinese	CN102777314-A CN10218332 26 Jun 2012	CN10218332 26 Jun 2012	DIIDW:2013C36848
331	P	GB2407345-A; GB2407345-B	Anchored floating unit for tidal energy extraction device, is configured to divert and accelerate water flowing through water channels equipped with multiple twin impellers so as to extract energy from water.	GOODREDGE R V	GOODREDGE R V (GOOD-Individual)	2005308753	NOVELTY - The floating device (3) is configured to divide, divert and accelerate the water flowing through the water channels. Several twin impellers (2) are arranged in the water flow channels, to extract energy from the water flowing through the channels.	Q55 (Positive displacement fluid machines/pumps/compressors (i.e. for driving fluid) (F04B,C)); X15 (Non-Fossil Fuel Power Generating Systems)	X15-C02	F03B-013/22; F03B-013/26	GB2407345-A 27 Apr 2005 F03B-013/22 200532 Pages: 15 English	GB2407345-A GB018300 05 Aug 2003	GB018300 05 Aug 2003	DIIDW:2005308753
332	P	SU1368476-A	Tidal energy to electrical power conversion - uses conductors in form of electrical capacitors with insulated metal plates to determine rise and fall of water level.	ZOSIMOV A V	ZOSIMOV A V (ZOSI-Individual)	1988226629	The method of converting tidal energy into electricity consists of receiving the tidal energy on semi-submerged conductors which are connected to current and load sources. The conductors used are in the form of electrical capacitors with metal plates (2) covered with insulation (3). These are employed to determine the period of the rise and fall of the water by measuring the hydrostatic pressure …	Q55 (Positive displacement fluid machines/pumps/compressors (i.e. for driving fluid) (F04B,C)); X11 (Power Generation and High Power Machines)	X11-B09	F03B-013/12	SU1368476-A 23 Jan 1988 F03B-013/12 198832 Pages: 3 Russian	SU1368476-A SU3994216 23 Dec 1985	SU3994216 23 Dec 1985	DIIDW:1988226629
333	P	CN213870108-U	Double-blade tidal energy water turbine, has blade installed on mounting seat that is installed on one end of swinging rod, where another end of swinging rod is installed on big gear, and small gear installed on output shaft of folding motor.	HAO J	UNIV CHINA PETROLEUM EAST CHINA (UYPE-C)	202192180E	NOVELTY - The utility model relates to a tide energy generating water turbine field, more specifically to a new double-blade tidal energy water turbine, compact design structure, accurate and stable transmission, safety, and capable of improving the ability of water turbine resisting mutation sea condition. A new double-blade tidal energy water turbine comprises a gravity type bearing structure, …	Q54 (Non-positive displacement fluid engines (i.e. driven by fluid); Miscellaneous motors and machines for producing mechanical power/thrust (F03B,D,G,H)); X15 (Non-Fossil Fuel Power Generating Systems)	Q54-A05; Q54-X; X15-C01; X15-C02B	F03B-013/00; F03B-003/04; F03B-003/12; F03B-011/00; F03B-013/14; F03B-013/26	CN213870108-U 03 Aug 2021 F03B-013/00 202165 Pages: 8 Chinese	CN213870108-U CN22847951 01 Dec 2020	CN22847951 01 Dec 2020	DIIDW:202192180E
334	P	CN108716450-A	Vertical axis tidal energy impeller device based on spiral blade, has spiral blade staggered to connect spoke mechanisms on upper and lower turntables and fixedly connected to airfoil shape spoke plate in spoke mechanism.	XU G	UNIV JIANGSU SCI & TECHNOLOGY (UYJG-C)	201886330S	NOVELTY - The vertical axis tidal energy impeller device has turntable (2) which is provided with several spoke mechanisms distributed at equal intervals along the circumferential direction. The spoke mechanism includes rectangular shape spoke plate (4) and airfoil shape spoke plate (6) that are respectively arranged at inner end and outer end of spoke airfoil plate (5). A spiral blade (8) is sta…	Q54 (Non-positive displacement fluid engines (i.e. driven by fluid); Miscellaneous motors and machines for producing mechanical power/thrust (F03B,D,G,H)); X15 (Non-Fossil Fuel Power Generating Systems)	Q54-A05; Q54-X; X15-C02	F03B-013/26; F03B-003/12	CN108716450-A 30 Oct 2018 F03B-013/26 201878 Pages: 7 Chinese	CN108716450-A CN10247464 23 Mar 2018	CN10247464 23 Mar 2018	DIIDW:201886330S
335	P	CN205823536-U	Tidal power generating device has centering structure which is provided between cylindrical projection of horizontal portion, and main shaft of tidal energy capturing mechanism.	YU C	YU C (YUCC-Individual)	201701248S	NOVELTY - A tidal power generating device, comprising a shell, a tide energy capturing mechanism, a transmission mechanism and a generator; the tide energy capturing mechanism comprises a main shaft, a rotating wheel, a supporting rod and a turning blade; said shell comprises a horizontal part, a balance part and a fixing part; the transmission mechanism comprises a differential mechanism and a p…	Q54 (Non-positive displacement fluid engines (i.e. driven by fluid); Miscellaneous motors and machines for producing mechanical power/thrust (F03B,D,G,H)); X15 (Non-Fossil Fuel Power Generating Systems)	Q54-X; X15-C02	F03B-011/00; F03B-013/26	CN205823536-U 21 Dec 2016 F03B-013/26 201707 Pages: 12 Chinese	CN205823536-U CN20440584 12 May 2016	CN20440584 12 May 2016	DIIDW:201701248S
336	P	CN102840093-A; CN102840093-B	Bi-directional tidal energy driven seawater desalinating and power-generating device comprises reservoir, turbines, transmission box, gearbox, high pressure pumps, reverse osmosis membrane assembly, and generator.	LI J	UNIV GUANGDONG OCEAN (UYOG-C)	2013E95707	NOVELTY - A bi-directional tidal energy driven seawater desalinating and power-generating device comprises an impounding water reservoir (102) having water inlet and outlet pipes, each having electromagnetic valve. First and second turbines are respectively set on the water inlet and outlet pipe of the water reservoir. A transmission box has two groups of input end of the driving gear, where each…	D15 (Chemical or biological treatment of water, industrial waste and sewage - including purification, sterilising or testing water, scale prevention, treatment of sewage sludge, regeneration of active carbon which has been used for water treatment and impregnating water with gas e.g. CO2, but excluding plant and anti-pollution devices (C02).); Q54 (Non-positive displacement fluid engines (i.e. dr…	D04-A01D; D04-A01E; D04-B07F; X15-C02	C02F-001/44; C02F-103/08; F03B-013/26	CN102840093-A 26 Dec 2012 F03B-013/26 201325 Pages: 24 Chinese	CN102840093-A CN10210394 04 Dec 2010	CN10210394 04 Dec 2010	DIIDW:2013E95707
337	P	IN202421023292-A	Tidal energy converter for harnessing tidal energy from ocean, has modified U-Tube provided with legs with different diameters, and float encased in concrete caisson to guide vertical up and down movement of piston rod, where caisson protects float from waves and ensures safety against drifting.	KALE A G	KALE A G (KALE-Individual)	2024442538	NOVELTY - The converter has a modified U-Tube provided with legs with different diameters connected with a converging circular tube. A piston rod is provided in a cylinder and attached to a heavy non-corrosive coated mild steel lever arm. The lever arm is asymmetrically/ eccentrically pivoted with a friction reducing arrangement. A floating container is made of metal with non-corrosive coat and a…	Q54 (Non-positive displacement fluid engines (i.e. driven by fluid); Miscellaneous motors and machines for producing mechanical power/thrust (F03B,D,G,H)); Q42 (Hydraulic engineering, soil shifting and sewerage (E02, 3)); X15 (Non-Fossil Fuel Power Generating Systems)	Q54-X; Q42-A03; Q42-A10; X15-C01; X15-C02	E02B-017/00; E02B-009/08; F03B-013/18; F03B-013/26; F03B-017/06	IN202421023292-A 19 Apr 2024 F03B-013/26 202438 English	IN202421023292-A IN21023292 25 Mar 2024	IN21023292 25 Mar 2024	DIIDW:2024442538
338	P	CN115566751-A	Friction nano-generating multi-energy coupling unmanned underwater charging pile with tidal current energy, has charging pile that wirelessly charges underwater robot through wireless charging seat.	DONG Y	UNIV NORTHEAST NORMAL (UYNO-C)	202305856J	NOVELTY - The pile has an offshore platform (1), a charging pile, a tide energy friction nano-generator (3), and a wave energy friction nano-generator (4). The tide energy friction nano-generator is set in the offshore platform. The wave energy friction nanogenerator and the charging pile is set around the offshore platform. The offshore platform is respectively connected with the charging pile t…	U24 (Amplifiers and Low Power Supplies); V06 (Electromechanical Transducers and Small Machines); W06 (Aviation, Marine and Radar Systems); X16 (Electrochemical Storage); X15 (Non-Fossil Fuel Power Generating Systems)	U24-H02; V06-M10; V06-U05; W06-A03A5R; W06-C09; X16-G03; X16-H; X15-C01B2; X15-C02; X15-C03	B63C-011/52; F03B-013/14; F03B-013/26; G01S-019/14; H02J-007/00; H02N-001/04	CN115566751-A 03 Jan 2023 H02J-007/00 202307 Chinese	CN115566751-A CN11040527 29 Aug 2022	CN11040527 29 Aug 2022	DIIDW:202305856J
339	P	WO2015060669-A2; KR2015048641-A; KR2015048645-A; WO2015060669-A3	Tidal energy utilized current generator, has stator equipped with support unit, where relation between diameter of rotational track of rotating airfoil part and diameter of rotator are expressed by using specific formula.	LEE S	LEE S (LEES-Individual)	2015275115	NOVELTY - The generator (100) has a rotator (120) rotated with a rotating airfoil part. A generation unit (130) produces electricity by using rotary power of the rotator. A support unit (140) supports the rotator and the generation unit. The generation unit is provided with a rotor that is equipped with an edge of the rotator. A stator is equipped with the support unit. Relation between diameter …	Q54 (Non-positive displacement fluid engines (i.e. driven by fluid); Miscellaneous motors and machines for producing mechanical power/thrust (F03B,D,G,H))		F03B-017/06; F03B-003/14; F03B-007/00	WO2015060669-A2 30 Apr 2015 F03B-017/06 201532 Pages: 14	WO2015060669-A2 WOKR010020 23 Oct 2014	KR128177 26 Oct 2013	DIIDW:2015275115
340	P	WO2013107724-A2; GB2499705-A; WO2013107724-A3; GB2499705-B	System for capturing tidal energy from e.g. inshore water, has energy capture component moored to off-shore docking component via docking station for drifting docking station according to direction of tidal flow.	ELPHINSTONE G	E & H BUILDING CONTRACTORS LTD (EHBU-Non-standard)	2013M45254	NOVELTY - The system (101) has an off-shore docking component anchored or tethered and positioned to inhibit drift with tide. A buoyant energy capture component (109) comprises a support structure i.e. floating platform (113), between two hulls (115) submergible by a tidal energy capture mechanism. The energy capture component is moored to the off-shore docking component via a docking station (10…	Q54 (Non-positive displacement fluid engines (i.e. driven by fluid); Miscellaneous motors and machines for producing mechanical power/thrust (F03B,D,G,H))		F03D-000/00; F03B-013/26	WO2013107724-A2 25 Jul 2013 F03D-000/00 201355 Pages: 40 English	WO2013107724-A2 WOEP050641 15 Jan 2013	GB000748 17 Jan 2012	DIIDW:2013M45254
341	P	CN106228468-A	Tidal energy generating farm output power probability simulation method, involves calculating tidal energy generating thrust coefficient value, and determining tidal energy power generating field each output power rate.	REN Z	UNIV CHONGQING (UYCQ-C)	201680109M	NOVELTY - The method involves determining tidal energy generating farm tide flow rate. Tidal energy generating set total number of an electric field is obtained. Time tide flow rate random probability density function of component codewords is obtained. Relative position information of a machine is obtained. Tidal energy generating daily electric field output power random sample testing process i…	T01 (Digital Computers); X15 (Non-Fossil Fuel Power Generating Systems)	T01-J04A; T01-J05A2A; T01-J05A2C; T01-J05A3; T01-J15H; X15-C02; X15-C03	G06F-017/50; G06Q-050/06	CN106228468-A 14 Dec 2016 G06Q-050/06 201704 Pages: 13 Chinese	CN106228468-A CN10647996 09 Aug 2016	CN10647996 09 Aug 2016	DIIDW:201680109M
342	P	CN103472325-A; CN103472325-B	Wave energy and tide energy power generation detection platform system, has detecting platform provided with load adjusting module, and electric energy quality monitoring module and platform connected with tide energy generating system.	JING P	CHINA ELECTRIC POWER RES INST (SGCC-C)	2014D43408	NOVELTY - The system has a detecting platform provided with a load adjusting module and a short circuit simulation module. An electric energy quality monitoring module and the detecting platform are connected with a tide energy generating system. The electric energy quality monitoring module is provided with a computer and a controller. The controller and the electric energy quality monitoring mo…	S01 (Electrical Instruments); T01 (Digital Computers); X15 (Non-Fossil Fuel Power Generating Systems)	S01-H09; T01-J08F; X15-C01; X15-C02; X15-C03	G01R-031/00	CN103472325-A 25 Dec 2013 G01R-031/00 201416 Pages: 11 Chinese	CN103472325-A CN10364655 20 Aug 2013	CN10364655 20 Aug 2013	DIIDW:2014D43408
343	P	IN202421001351-A	Tidal energy conversion system for producing electrical power from sea waves using floating body connected to seabed in diverse marine environments, has buoyant structure is configured to rise and fall with tidal movements, cause input shaft to rotate and generate rotational movement at output shaft.	VYAS H A	VIBHAKAR IND PRIVATE LTD (VIBH-Non-standard)	202418517Q	NOVELTY - The system has a buoyant structure (1) configured to float on a water surface (3). An increasing gear system is directly connected with the buoyant structure. The gear system is provided with an input shaft (8) and an output shaft. A Revolutions Per Minute (RPM) control system and a torque load meter are operatively connected with the output shaft of the gear system. A foundation elemen…	Q42 (Hydraulic engineering, soil shifting and sewerage (E02, 3)); W06 (Aviation, Marine and Radar Systems); X15 (Non-Fossil Fuel Power Generating Systems)	Q42-A03; Q42-A10; W06-C07C; X15-C01; X15-C02	B63B-022/22; E02B-009/08; F03B-013/26	IN202421001351-A 09 Feb 2024 B63B-022/22 202420 English	IN202421001351-A IN21001351 08 Jan 2024	IN21001351 08 Jan 2024	DIIDW:202418517Q
344	P	CN211343202-U	Tidal energy generating device, has supporting component provided with supporting platform and multiple supporting columns, and impeller located in impeller cover and connected to shaft end of transmission shaft that is connected to supporting cover.	WANG X	TIANJIN HR-CHR TECHNOLOGY CO LTD (TIAN-Non-standard)	202085630P	NOVELTY - The utility model claims a tidal energy generating device and generating system, belonging to the technical field of tidal energy generating. The tidal energy generating device comprises a supporting component, a water storage tank component and a power conversion device. the supporting component comprises a supporting platform and multiple supporting columns arranged at the bottom of t…	Q54 (Non-positive displacement fluid engines (i.e. driven by fluid); Miscellaneous motors and machines for producing mechanical power/thrust (F03B,D,G,H)); X15 (Non-Fossil Fuel Power Generating Systems)	Q54-A05; Q54-X; X15-C02	F03B-013/00; F03B-013/26; F03B-003/00; F03B-003/16	CN211343202-U 25 Aug 2020 F03B-013/26 202072 Pages: 12 Chinese	CN211343202-U CN21851968 30 Oct 2019	CN21851968 30 Oct 2019	DIIDW:202085630P
345	P	KR2445501-B1	Tidal energy conversion device for tidal power generation, has first connecting chain that connects first interlocking sprocket, first latch sprocket and first guide sprocket to rotate in same direction as rotational direction of first sprocket.	KIHWA K	KIHWA K (KIHW-Individual)	2022C1392X	NOVELTY - The device has a first interlocking rotation guide for guiding a support shaft (341) to rotate in one direction in association with the rise of a pivot link element. A first interlocking rotation guide (342) guides the support shaft to rotate in one direction in conjunction with the descent of the pivot link element. The first interlocking rotation guide portion includes a first interlo…	Q54 (Non-positive displacement fluid engines (i.e. driven by fluid); Miscellaneous motors and machines for producing mechanical power/thrust (F03B,D,G,H)); X11 (Power Generation and High Power Machines); X15 (Non-Fossil Fuel Power Generating Systems)	Q54-X; X11-B; X15-C02	F03B-013/26	KR2445501-B1 20 Sep 2022 F03B-013/26 202278 Pages: 14	KR2445501-B1 KR055651 04 May 2022	KR055651 04 May 2022	DIIDW:2022C1392X
346	P	CN212229787-U	Tide energy safety pre-warning device, has top plate whose inner part is provided with wire groove that is connected with two slots, where inner side of wire groove is inserted with wire and electrically connected with inner electrode plate.	ZHOU X	ZHOU X (ZHOU-Individual)	2021045754	NOVELTY - The utility model claims a tide energy safety pre-warning device, the utility model relates to the technical field of tide energy safety pre-warning, the tide energy safety pre-warning device comprises a measuring ruler, a floating plate one; a floating plate two and a top plate; the floating plate one is located below the outer wall of the measuring ruler; and the floating plate two is…	W05 (Alarms, Signalling, Telemetry and Telecontrol)	W05-B07J	G08B-021/08	CN212229787-U 25 Dec 2020 G08B-021/08 202105 Pages: 8 Chinese	CN212229787-U CN20640346 24 Apr 2020	CN20640346 24 Apr 2020	DIIDW:2021045754
347	P	US2018313322-A1; WO2018200005-A1; US10458385-B2; CA3059892-A1; EP3615790-A1	Tidal energy conversion assembly, has drag panel coupled to displacement vessel, where directional converter activates generator to generate electricity when displacement vessel changes vessel's position relative to stationary location.	BLODGETT L	BIG MOON POWER INC (BIGM-Non-standard)	201885423A	NOVELTY - The assembly (100) has a drag panel (121) coupled to a displacement vessel (102), where the drag panel is rotatable about a horizontal axis. A directional converter (109) is coupled to a generator, where the directional converter and the generator are positioned at a stationary location. An anchor cable (103) includes a first end, a second end, and length (L2) between the first end and …	Q54 (Non-positive displacement fluid engines (i.e. driven by fluid); Miscellaneous motors and machines for producing mechanical power/thrust (F03B,D,G,H)); V06 (Electromechanical Transducers and Small Machines); X11 (Power Generation and High Power Machines); X15 (Non-Fossil Fuel Power Generating Systems)	Q54-X; V06-M10; X11-B; X11-J05B; X15-C02	F03B-013/26; H02K-007/18	US2018313322-A1 01 Nov 2018 F03B-013/26 201874 Pages: 33 English	US2018313322-A1 US582416 28 Apr 2017	CA3059892 28 Apr 2017	DIIDW:201885423A
348	P	CN111852738-A; CN213088147-U; WO2021258830-A1	Suspension automatic opposite wheel rim-type tide energy generating device, has wheel rim type generating water turbine provided with disk structure and fixed in air guide sleeve, and flow guide cover provided with posture sensor.	YUAN P	UNIV CHINA OCEAN (UYOC-C)	2020A9456D	NOVELTY - The device has a sinking base immersed below a water surface. A buoy is floated on the water surface. An anchor cable is fixed between the buoy and the sinking base. An air guide sleeve is mounted on the anchor rope through a traction rope. A wheel rim type generating water turbine is provided with a disk structure and vertically fixed in an air guide sleeve. The air guide sleeve is pro…	W06 (Aviation, Marine and Radar Systems); X15 (Non-Fossil Fuel Power Generating Systems)	W06-C01; W06-C15G; X15-C01; X15-C02	B63B-035/44; F03B-013/18; F03B-011/02; F03B-013/26	CN111852738-A 30 Oct 2020 F03B-013/18 202095 Pages: 12 Chinese	CN111852738-A CN10572885 22 Jun 2020	CN10572885 22 Jun 2020	DIIDW:2020A9456D
349	P	KR1734076-B1	Tidal energy utilized hybrid pumping power generation system, has cylinder connected to arm and connecting rod for making flow of seawater and increasing and decreasing inner pressure through reciprocation of piston.	KIM J H	KOREA OCEAN SCI & TECHNOLOGY INST (KOOC-C)	201734762B	NOVELTY - The system (1) has a water supply system (10) installed at a sea coast for converting fluid energy into mechanical energy for pumping seawater. A culture apparatus (20) lifts fishes by using the seawater pumped by the water supply system. A power generator (30) converts potential energy of the seawater drained from the culture apparatus into mechanical energy. A cylinder is connected to…	Q54 (Non-positive displacement fluid engines (i.e. driven by fluid); Miscellaneous motors and machines for producing mechanical power/thrust (F03B,D,G,H)); X11 (Power Generation and High Power Machines); X15 (Non-Fossil Fuel Power Generating Systems)	Q54-X; X11-B; X11-D05; X15-C02	F03B-013/08; A01K-061/00; F03B-013/26	KR1734076-B1 12 May 2017 F03B-013/08 201739 Pages: 18	KR1734076-B1 KR048407 20 Apr 2016	KR048407 20 Apr 2016	DIIDW:201734762B
350	P	CN110657059-A; CN110657059-B	Fan blade useful for power generating devices in areas with rich tidal energy, has fan panel whose side is opened with drainage through groove and guide groove, and decompression hole formed on outer of movable chute.	LU J	XUZHOU DAJIAO MATERIALS TRADE CO LTD (XUZH-Non-standard)	202007548F	NOVELTY - Fan blade has a blade body (2) connected with a power input end of a generator main body (1). A fan panel (3) is opened with a movable chute and a movable cavity. The movable chute is inserted with an additional panel and connected with multi-connecting rods. An end of the additional panel is fixedly connected with a limiting plate. The limiting plate is formed with a side wall of the m…	Q54 (Non-positive displacement fluid engines (i.e. driven by fluid); Miscellaneous motors and machines for producing mechanical power/thrust (F03B,D,G,H)); X15 (Non-Fossil Fuel Power Generating Systems)	Q54-X; X15-C02	F03B-013/26	CN110657059-A 07 Jan 2020 F03B-013/26 202009 Pages: 16 Chinese	CN110657059-A CN11144725 20 Nov 2019	CN11144725 20 Nov 2019	DIIDW:202007548F
351	P	CN202531348-U	Device used for using tidal energy to generate electricity combined with sea water desalinization, comprises hydraulic machine, transmission unit, seawater desalting device and generator.	HUANG Z	XIAMEN RUISIDA ELECTRICAL&MECHANICAL (XIAM-Non-standard)	2013C34552	NOVELTY - The device comprises hydraulic machine, transmission unit, seawater desalting device and generator. The water wheel machine is set at the bottom of the dam, and wheels through the shaft joint are connected in series. The outer ring of the water wheel is provided with blades. The first transmission wheel is set on the output shaft. The other end is set on dam holder. Sea water desalting …	D15 (Chemical or biological treatment of water, industrial waste and sewage - including purification, sterilising or testing water, scale prevention, treatment of sewage sludge, regeneration of active carbon which has been used for water treatment and impregnating water with gas e.g. CO2, but excluding plant and anti-pollution devices (C02).); Q54 (Non-positive displacement fluid engines (i.e. dr…	D04-A01; D04-B07F; X15-C02	C02F-001/44; C02F-103/08; F03B-013/26	CN202531348-U 14 Nov 2012 F03B-013/26 201319 Pages: 6 Chinese	CN202531348-U CN20231450 22 May 2012	CN20231450 22 May 2012	DIIDW:2013C34552
352	P	CN106870270-A	Stack-type dielectric elastomer tidal energy generator, has impeller and center shaft joint fixed with each other, and upper box body mechanism and lower box body mechanism fixed with each other to ensure thimble sliding process.	BAO H	UNIV ZHEJIANG NORMAL (UYZN-C)	201747634E	NOVELTY - The generator has a generator main body provided with a guiding unit, an impeller, a base, a multi-stacked-dielectric elastomer, a thimble, a bearing, a plane cam, a lower box body, a center shaft and a key. Two ends of the multi-stacked-dielectric elastomer are connected with the base and the thimble. The plane cam is connected with the center shaft through the key. The impeller and th…	A88 (Mechanical engineering and tools e.g. valves, gears and conveyor belts.); Q54 (Non-positive displacement fluid engines (i.e. driven by fluid); Miscellaneous motors and machines for producing mechanical power/thrust (F03B,D,G,H)); X15 (Non-Fossil Fuel Power Generating Systems)	A12-H; Q54-X; X15-C02	F03B-013/26	CN106870270-A 20 Jun 2017 F03B-013/26 201756 Pages: 5 Chinese	CN106870270-A CN10227196 05 Apr 2017	CN10227196 05 Apr 2017	DIIDW:201747634E
[truncated: 854 more rows]
