# Supplementary material for: Wave and Tidal Energy: A Patent Landscape Study
Source: Preprints.org preprint supplement (doi:10.20944/preprints202409.0921.v1), 2024-09-11
Supplement: Supplementary file 2 [file wave-patent.xlsx]

## Sheet: Sheet1
Index	Patent Type	Patent Number	Title	Applicant	Assignee	Application Number	Abstract	Description Classification	Main Classification	International Patent Classification	Priority Date	Application Date	Publication Date	Unique Document Identifier	ER
1	P	WO2018023731-A1; EP3494302-A1; US2019271292-A1; EP3494302-A4; US10815960-B2; EP3494302-B1	Wave energy converter e.g. land-portable, marine-deployable device, has anchor portion that comprises transport support structure configured to carry floating portion.	NOYEK M	NOYEK M (NOYE-Individual)	201811170P	NOVELTY - The wave energy converter (101) has an anchor portion (105) that comprises a transport support structure (109) configured to carry a floating portion (103). The floating portion has a centre of buoyancy that is laterally offset from the centroid of the floating portion by a distance of 5 percent of a maximum lateral dimension of the floating portion when the floating portion is in water…	Q54 (Non-positive displacement fluid engines (i.e. driven by fluid); Miscellaneous motors and machines for producing mechanical power/thrust (F03B,D,G,H)); X15 (Non-Fossil Fuel Power Generating Systems)	Q54-X; X15-C01	F03B-013/14; F03B-013/20; F03B-013/18	WO2018023731-A1 08 Feb 2018 F03B-013/14 201812 Pages: 44 English	WO2018023731-A1 WOCN093622 05 Aug 2016	EP911326 05 Aug 2016	DIIDW:201811170P
2	P	US2014042749-A1; WO2014026027-A2; WO2014026027-A3; US8937395-B2	System for mounting set of wave energy converters in ocean, has slider mounted on pole in manner that permits slider to move vertically along pole and rotate about pole, and wave energy converters mounted on slider.	SIEGEL S G	SIEGEL S G (SIEG-Individual)	2014C91391	NOVELTY - The system (300) has a pole (220) attached to a floor of the ocean. A slider (310) is mounted on the pole in a manner that permits the slider to move vertically along the pole and rotate about the pole. First and second wave energy converters (102) are mounted on the slider. The slider comprises a top opening through which the pole extends between the first and second wave energy conver…	P56 (Machine tools (B23P,Q).); Q54 (Non-positive displacement fluid engines (i.e. driven by fluid); Miscellaneous motors and machines for producing mechanical power/thrust (F03B,D,G,H)); X15 (Non-Fossil Fuel Power Generating Systems)	X15-C01	B23P-017/04; F03B-013/14; F03B-013/00; F03B-013/10; F03B-013/12; H02P-009/04	US2014042749-A1 13 Feb 2014 F03B-013/14 201415 Pages: 13 English	US2014042749-A1 US570018 08 Aug 2012	US570018 08 Aug 2012	DIIDW:2014C91391
3	P	CN113153615-A; CN113153615-B	Method for controlling wave energy conversion device in marine environment, involves performing optimal solution to switching constraint model, and utilizing control force for controlling wave energy conversion device at current time.	WANG Z	UNIV YANSHAN (UYAN-C)	2021913020	NOVELTY - The method involves obtaining a basic parameter of a current time. A speed matrix and a position matrix are constructed based on the basic parameter of the current time. A switching constraint model is constructed according to the speed matrix and the position matrix. A constraint condition of the switching constraint model is determined by a buoy position of the current time. An optima…	Q54 (Non-positive displacement fluid engines (i.e. driven by fluid); Miscellaneous motors and machines for producing mechanical power/thrust (F03B,D,G,H)); X15 (Non-Fossil Fuel Power Generating Systems)	Q54-X; X15-C01; X15-C03	F03B-013/16; F03B-015/00	CN113153615-A 23 Jul 2021 F03B-015/00 202166 Pages: 17 Chinese	CN113153615-A CN10648934 10 Jun 2021	CN10648934 10 Jun 2021	DIIDW:2021913020
4	P	WO2016009647-A1; AU2015291050-A1; CN106489024-A; IN201717000921-A; EP3169892-A1; US2017167465-A1; JP2017521599-W; BR112016030729-A2; EP3169892-A4; AU2015291050-B2; JP6448153-B2; IN403473-B	Wave energy converter system for converting onshore wave energy to electric power, comprises multiple wave energy converter units that are installed adjacent to a shoreline to receive water.	SHINTAKE T	OKINAWA INST SCI & TECHNOLOGY (OKIN-Non-standard)	201605118L	NOVELTY - The wave energy converter system comprises multiple wave energy converter units (201) that are installed adjacent to a shoreline to receive water. The wave converter unit has a generator that contains a rotor shaft. The generator is configured to generate electricity in accordance with rotation of the rotor shaft. Multiple blades are attached to the rotor shaft and causes the rotor shaf…	A88 (Mechanical engineering and tools e.g. valves, gears and conveyor belts.); Q54 (Non-positive displacement fluid engines (i.e. driven by fluid); Miscellaneous motors and machines for producing mechanical power/thrust (F03B,D,G,H)); X11 (Power Generation and High Power Machines); X15 (Non-Fossil Fuel Power Generating Systems)	A12-H; Q54-X; X11-B; X15-C01B1	F03B-013/14; F03B-013/22; F03B-003/04; F03B-003/14	WO2016009647-A1 21 Jan 2016 F03B-013/14 201609 Pages: 34 English	WO2016009647-A1 WOJP003576 15 Jul 2015	US024790P 15 Jul 2014	DIIDW:201605118L
5	P	CN210178510-U	Multi-angle nodding duck type wave energy converting device, has nodding duck wave energy converting device fixed on side of polygon platform, and energy conversion device for converting wave energy into electrical energy.	ZENG Z	BEIJING INST TECHNOLOGY ZHUHAI COLLEGE (BTZH-C)	202024634X	NOVELTY - The utility model claims a multi-angle nodding duck type wave energy conversion device, comprising a polygonal platform and at least one nodding duck wave energy converting device. each side wherein each nodding duck wave energy conversion device is respectively fixed on the floating platform of polygon edges; each nodding duck wave energy conversion device comprises the duck and energy…	Q54 (Non-positive displacement fluid engines (i.e. driven by fluid); Miscellaneous motors and machines for producing mechanical power/thrust (F03B,D,G,H)); X15 (Non-Fossil Fuel Power Generating Systems)	Q54-X; X15-C01A1	F03B-011/00; F03B-013/20	CN210178510-U 24 Mar 2020 F03B-013/20 202029 Pages: 13 Chinese	CN210178510-U CN21086455 10 Jul 2019	CN21086455 10 Jul 2019	DIIDW:202024634X
6	P	DE102010025907-A1; WO2012000618-A2; WO2012000618-A3	Wave energy converter for conversion of kinetic energy of wave motion of fluid into another form of energy, has cylinder held in fluid in immersed condition, and is movable approximately perpendicular to longitudinal axis of cylinder.	HAGEMANN B	BOSCH GMBH ROBERT (BOSC-C)	2012A18083	NOVELTY - The wave energy converter (1) has a cylinder (7) which is held in a fluid (2) in an immersed condition. A body is partially disposed within the cylinder, and is movable approximately perpendicular to a longitudinal axis of the cylinder. An energy of a translational relative movement between the body and the cylinder transforms into another form of energy during the operation of the wave…	Q54 (Non-positive displacement fluid engines (i.e. driven by fluid); Miscellaneous motors and machines for producing mechanical power/thrust (F03B,D,G,H)); X15 (Non-Fossil Fuel Power Generating Systems)	X15-C01	F03B-013/18; F03B-013/20; F03B-013/14	DE102010025907-A1 05 Jan 2012 F03B-013/18 201205 Pages: 32 German	DE102010025907-A1 DE10025907 02 Jul 2010	DE10025907 02 Jul 2010	DIIDW:2012A18083
7	P	US2014042748-A1; WO2014026019-A2; WO2014026019-A3; US9297351-B2	System for operating cluster of cycloidal wave energy converters, includes each of mountings in form of active mounting for moving each wave energy converter along axis.	SIEGEL S G	SIEGEL S G (SIEG-Individual)	2014C91392	NOVELTY - The system has platforms (400) including mountings (351,353), each for mounting a respective cycloidal wave energy converter (311,313) on both sides of a central wave energy converter (312). Each mounting is an active mounting for moving the wave energy converter along an axis. A control system operates the mountings so that the distance between wave energy converters depends on the wav…	Q54 (Non-positive displacement fluid engines (i.e. driven by fluid); Miscellaneous motors and machines for producing mechanical power/thrust (F03B,D,G,H)); X15 (Non-Fossil Fuel Power Generating Systems)	X15-C01	F03B-013/20; F03B-013/18	US2014042748-A1 13 Feb 2014 F03B-013/20 201413 Pages: 16 English	US2014042748-A1 US569988 08 Aug 2012	US569988 08 Aug 2012	DIIDW:2014C91392
8	P	KR2010060059-A	Wave energy conversion device for changing wave energy to mechanical energy, has lever, drive shaft rotating in certain direction, and electric unit for transmitting rotation to master dynamic unit.	CHANG LOG J	CHANG L J (CHAN-Individual)	2010G91893	NOVELTY - The wave energy conversion device has a lever (15), a drive shaft (21) rotating in certain direction, an electric unit for transmitting rotation to a master dynamic unit. An inversion rotation tool (20) is provided, which has a driven unit and one way clutch (80) for delivering unidirectional rotation to lever of drive shaft.	Q54 (Non-positive displacement fluid engines (i.e. driven by fluid); Miscellaneous motors and machines for producing mechanical power/thrust (F03B,D,G,H)); X15 (Non-Fossil Fuel Power Generating Systems)	X15-C01	F03B-013/00; F03B-013/12; F03B-013/18	KR2010060059-A 07 Jun 2010 F03B-013/18 201042 Pages: 20	KR2010060059-A KR118486 27 Nov 2008	KR118486 27 Nov 2008	DIIDW:2010G91893
9	P	WO2014172686-A1; CA2909809-A1; AU2014253747-A1; EP2986496-A1; US2016075409-A1	Mooring system for array of wave energy converters, has secondary tethers coupled to primary tether at given distances along length of primary tether and each provided with coupling mechanism for retaining wave energy converter.	NICOLL R S	EPITOME PHARM LTD (EPIT-Non-standard)	2014T33181	NOVELTY - The mooring system (100) has two seabed anchors (112,114) coupled to a primary tether (110A,110B). Secondary tethers (116) are coupled to the primary tether at predetermined distances along the length of the primary tether. Each secondary tether has a coupling mechanism for retaining a wave energy converter (120).	W06 (Aviation, Marine and Radar Systems); X15 (Non-Fossil Fuel Power Generating Systems)	W06-C01; X15-C01	B63B-021/00; B63B-021/50; F03B-013/14	WO2014172686-A1 23 Oct 2014 B63B-021/00 201472 Pages: 30 English	WO2014172686-A1 WOUS034726 18 Apr 2014	US814108P 19 Apr 2013	DIIDW:2014T33181
10	P	WO2016159856-A1; SE201530044-A1; SE201530060-A1; EP3277949-A1; EP3277949-A4; US2018363621-A1; SE541139-C2; US10495052-B2; SE541894-C2; EP3277949-B1	Wave energy converter for harvesting and converting wave energy into electrical power, comprises energy conversion assembly with energy collecting device for collecting energy from movements of working piston relative to buoyant body.	ALM F	W4P WAVES4POWER AB (WFOU-Non-standard)	201662757M	NOVELTY - The wave energy converter (100) comprises a buoyant body (101), and an acceleration tube (102) attached to the buoyant body, where a portion of the acceleration tube defines a working cylinder (103) between the upper end and the lower end. An energy conversion assembly (106) is provided with an energy collecting device (107) for collecting energy from the movements of a working piston (…	A95 (Transport - including vehicle parts, tyres and armaments.); W06 (Aviation, Marine and Radar Systems); X15 (Non-Fossil Fuel Power Generating Systems)	A12-H; A12-T04D; W06-C01; X15-C01	B63B-021/50; F03B-013/20; B63B-021/04; B63B-022/02; F03B-013/18; B63B-035/44; F03B-013/14	WO2016159856-A1 06 Oct 2016 F03B-013/20 201669 Pages: 33 English	WO2016159856-A1 WOSE000016 31 Mar 2016	SE030044 02 Apr 2015	DIIDW:201662757M
11	P	WO2021068030-A1; AU2020223704-A1	Wave energy converter e.g. side-by- side coupled wave energy converters, has outlet shaft which extends to rear wall and outlet shaft is provided with turbine and multiple retractable feet are arranged to engage with seabed.	DE GEETER P J	DE GEETER P J (DGEE-Individual)	2021392630	NOVELTY - The wave energy converter (10) has a reservoir which is provided with an inlet side (20) and an outlet side (22). The inlet side including a screen (24) which is arranged to permit one-way water flow. The outlet side includes a rear wall (32). The screen extends vertically between a lowest level and a highest level. The height of the screen being 80 percentage of the height of the reser…	Q42 (Hydraulic engineering, soil shifting and sewerage (E02, 3)); Q54 (Non-positive displacement fluid engines (i.e. driven by fluid); Miscellaneous motors and machines for producing mechanical power/thrust (F03B,D,G,H)); X15 (Non-Fossil Fuel Power Generating Systems)	Q42-A03; Q54-X; X15-C01	F03B-013/14; F03B-013/22; E02B-009/08	WO2021068030-A1 15 Apr 2021 F03B-013/14 202133 Pages: 31 English	WO2021068030-A1 WOAU051074 06 Oct 2020	AU903764 06 Oct 2019	DIIDW:2021392630
12	P	WO2006079823-A1	Wave energy converter has compressing unit that compresses first container in response to separation of buoyancy material and resistance material.	PALMER B W	PALMER B W (PALM-Individual)	2006577727	NOVELTY - The wave energy converter (2) has a first container (4) for containing a volume of fluid, and a second container (6) provided at the first end of the first container. A turbine (7) is arranged in the first container. A plate member (8) is arranged adjacent the second end of the first container. A compressing unit compresses the first container in response to separation of the buoyancy m…	Q54 (Non-positive displacement fluid engines (i.e. driven by fluid); Miscellaneous motors and machines for producing mechanical power/thrust (F03B,D,G,H)); X15 (Non-Fossil Fuel Power Generating Systems)	X15-C01	F03B-013/18; F03B-013/22	WO2006079823-A1 03 Aug 2006 F03B-013/18 200659 Pages: 16 English	WO2006079823-A1 WOGB000278 27 Jan 2006	GB001873 29 Jan 2005	DIIDW:2006577727
13	P	CN209761619-U	Torsion bi-stable device for wave energy converter, has rotating shaft whose two ends are connected with two ends of sealed cylinder through cover plate, and spring device hinged between inner wall of turntable edge and sealed cylinder along radial direction.	XI R	UNIV HUNAN (UYHU-C)	2019A5380U	NOVELTY - The utility model claims a torsion bistable device for wave energy converter, comprising a support, a rotating shaft, a turntable and a spring device, a support comprising a packaging cylinder and its bracket, packing barrel horizontally arranged; the rotating shaft is connected to the axial centre of the turntable, two ends of the rotating shaft passes through the cover plate at two en…	Q54 (Non-positive displacement fluid engines (i.e. driven by fluid); Miscellaneous motors and machines for producing mechanical power/thrust (F03B,D,G,H)); X15 (Non-Fossil Fuel Power Generating Systems)	Q54-X; X15-C01	F03B-013/14; F03B-013/18	CN209761619-U 10 Dec 2019 F03B-013/14 201997 Pages: 14 Chinese	CN209761619-U CN20372323 22 Mar 2019	CN20372323 22 Mar 2019	DIIDW:2019A5380U
14	P	GB2535490-A	Pendulum wave energy converter comprises a ramp rail that propagates forward and the pendulum is set to reach the parametric resonance, and a pendulum is connected with the device to generate electricity.	YURCHENKO D	YURCHENKO D (YURC-Individual)	2016513481	NOVELTY - The pendulum wave energy converter comprises a ramp rail that propagates forward. The pendulum is set to reach the parametric resonance. The motion is transferred to the shaft. The pendulum is connected with the device to generate electricity.	Q54 (Non-positive displacement fluid engines (i.e. driven by fluid); Miscellaneous motors and machines for producing mechanical power/thrust (F03B,D,G,H)); X15 (Non-Fossil Fuel Power Generating Systems)	Q54-X; X15-C01	F03B-013/14	GB2535490-A 24 Aug 2016 F03B-013/14 201657 Pages: 10 English	GB2535490-A GB002664 17 Feb 2015	GB002664 17 Feb 2015	DIIDW:2016513481
15	P	WO2013011251-A1	Designing method for wave energy converter configured to float in water involves designing one or more converter properties resulting heave, roll or pitch resonances and anti-phase motion of converter bodies for given wave field.	STANSBY P K	MACE WAVE LTD (MACE-Non-standard)	2013B47870	NOVELTY - The designing method involves designing the properties of the wave energy converter such that the wave energy converter is tuned or tunable for use in a particular wave field. The wave energy converter heaves resonance of one or both of the primary body (2) and the second body (6), and/or roll or pitch resonance of one or both of the primary and secondary bodies, and substantially anti-…	Q54 (Non-positive displacement fluid engines (i.e. driven by fluid); Miscellaneous motors and machines for producing mechanical power/thrust (F03B,D,G,H)); X15 (Non-Fossil Fuel Power Generating Systems)	X15-C01	F03B-013/20	WO2013011251-A1 24 Jan 2013 F03B-013/20 201311 Pages: 30 English	WO2013011251-A1 WOGB000209 02 Mar 2012	GB012468 20 Jul 2011	DIIDW:2013B47870
16	P	WO2020209753-A1	Wave energy converter such as float-type wave energy converter has fork-shaped rods which are fixed in upper portion on each of shafts by counter-rotating ratchets, so as to ensure each free sliding of lower portion of one of rods.	BOGDANOVICH D M	BOGDANOVICH D M (BOGD-Individual)	2020A02895	NOVELTY - The converter has elongated float buoy (1), a permanently submerged lower reference buoy (6), a generator compartment (2) and a power take-off mechanism driven by rigid rods (4) made to slide in guides (5). A mechanism power take-off portion is located on a float buoy. Two identical coaxial shafts (3) are removed from the mechanism. Fork-shaped rods are fixed in the upper portion on eac…	Q54 (Non-positive displacement fluid engines (i.e. driven by fluid); Miscellaneous motors and machines for producing mechanical power/thrust (F03B,D,G,H)); X15 (Non-Fossil Fuel Power Generating Systems)	Q54-X; X15-C01A1	F03B-013/18	WO2020209753-A1 15 Oct 2020 F03B-013/18 202085 Pages: 15 Russian	WO2020209753-A1 WORU000113 04 Mar 2020	RU110808 11 Apr 2019	DIIDW:2020A02895
17	P	CN113417790-A	Wave energy conversion system has spiral shaft, whose end is connected with transmission shaft of generator and second end extends to wave collecting passage, and floating and sinking device is installed on sides of wave collecting device.	KUANG W	KUANG W (KUAN-Individual)	2021B2393C	NOVELTY - The wave energy conversion system has a wave collecting device (1) provided with a wave collecting flow passage (6). The wave collecting flow passage is provided with a wave collecting opening (7) and a wave collecting output port (8). A wave transmitting device (2) is provided with a wave flow passage (9). An end of the wave flow passage is connected with the wave collecting output por…	Q54 (Non-positive displacement fluid engines (i.e. driven by fluid); Miscellaneous motors and machines for producing mechanical power/thrust (F03B,D,G,H)); X15 (Non-Fossil Fuel Power Generating Systems)	Q54-X; X15-C01	F03B-013/14	CN113417790-A 21 Sep 2021 F03B-013/14 202181 Pages: 13 Chinese	CN113417790-A CN10907082 09 Aug 2021	CN10907082 09 Aug 2021	DIIDW:2021B2393C
18	P	CN107701359-A; CN107701359-B	Oscillating water column wave energy conversion function featured floating breakwater structure, has linkage shaft connected with floating contact and located in cylindrical passage of air chamber, and generator located in floating body.	HE F	UNIV ZHEJIANG (UYZH-C)	201815381U	NOVELTY - The component has a floating body provided with an internal structure that is provided with an air chamber, an air turbine, a turbine bracket, a linkage shaft, a generator, a cushion layer and an air chamber body. The air turbine is located in a cylindrical passage of the air chamber body. The generator is arranged with an outer side of the air chamber body. The cushion layer is located…	Q42 (Hydraulic engineering, soil shifting and sewerage (E02, 3)); Q54 (Non-positive displacement fluid engines (i.e. driven by fluid); Miscellaneous motors and machines for producing mechanical power/thrust (F03B,D,G,H)); X15 (Non-Fossil Fuel Power Generating Systems)	Q42-A03; Q54-X; X15-C01	E02B-003/06; E02B-009/08; F03B-013/24	CN107701359-A 16 Feb 2018 F03B-013/24 201817 Pages: 12 Chinese	CN107701359-A CN10835281 15 Sep 2017	CN10835281 15 Sep 2017	DIIDW:201815381U
19	P	GB2486279-A; WO2012076851-A1; EP2649304-A1; GB2486279-B	Wave energy converter used with marine platform or marine energy generation apparatus, has controller which operates generator in generation mode or damping mode in which wave motion is reduced more than in the generation mode.	PACKARD S J	TRIDENT ENERGY LTD (TRID-Non-standard)	2012G60896	NOVELTY - The wave energy converter (10) includes at least one float (1) which can be immersed in waves and connected to the armature (2) of a generator (3). A controller (30) operates the generator in a generation mode for converting wave energy into electricity, or a damping mode in which wave motion is reduced more than in the generation mode and the amount of wave energy converted into electr…	Q42 (Hydraulic engineering, soil shifting and sewerage (E02, 3)); W06 (Aviation, Marine and Radar Systems); X15 (Non-Fossil Fuel Power Generating Systems)	W06-C01; X15-B01B; X15-C01; X15-C03	B63B-039/10; E02B-003/06; F03B-013/18; F03D-009/00; F03B-013/20	GB2486279-A 13 Jun 2012 F03B-013/18 201241 Pages: 21 English	GB2486279-A GB021031 10 Dec 2010	GB021031 10 Dec 2010	DIIDW:2012G60896
20	P	IN201921037247-A	Crescent wave energy converter for generating electricity using reverse osmosis, has circular plate that is supported to surface-a and surface-b and is configured to reduce friction between water and wave energy converter device.	VERULKAR K H	VERULKAR K H (VERU-Individual)	201999266Y	NOVELTY - The converter has a wave energy converter device that is provided with a surface-a (1) and a surface-b (2) which are at 135 degrees apart from each other. The upper side of the surface-a and lower side of surface-b are connected by a circular plate provided with a surface-c (3). The circular plate is supported to surface-a and surface-b and is configured to reduce the friction between w…	A88 (Mechanical engineering and tools e.g. valves, gears and conveyor belts.); Q54 (Non-positive displacement fluid engines (i.e. driven by fluid); Miscellaneous motors and machines for producing mechanical power/thrust (F03B,D,G,H)); X15 (Non-Fossil Fuel Power Generating Systems)	A12-H; Q54-X; X15-C01	F03B-013/18	IN201921037247-A 15 Nov 2019 F03B-013/18 201993 Pages: 14 English	IN201921037247-A IN21037247 16 Sep 2019	IN21037247 16 Sep 2019	DIIDW:201999266Y
21	P	WO2017026934-A1; SE201530115-A1; SE539195-C2; EP3334926-A1; US2018238294-A1; EP3334926-A4; US10197039-B2; EP3334926-B1	Wave energy converter for harvesting and converting wave energy into electrical power, has piston rod which forms mechanical connection between buoyant structure and working piston in working cylinder.	ALM F	W4P WAVES4POWER AB (WFOU-Non-standard)	201712503V	NOVELTY - The converter (200) has energy collecting device (207) which comprises a hydraulic pump in form of hydraulic cylinder (212) having a jacket and an internal pump piston (213) connected to piston rod (215), which forms mechanical connection between buoyant structure (201) and working piston (205) in working cylinder (203). The float structure (216) has buoyancy in water where wave energy …	Q54 (Non-positive displacement fluid engines (i.e. driven by fluid); Miscellaneous motors and machines for producing mechanical power/thrust (F03B,D,G,H)); X15 (Non-Fossil Fuel Power Generating Systems)	Q54-X; X15-C01	F03B-013/20; F03B-013/18; B63B-035/44	WO2017026934-A1 16 Feb 2017 F03B-013/20 201716 Pages: 27 English	WO2017026934-A1 WOSE000041 30 Jul 2016	SE030115 10 Aug 2015	DIIDW:201712503V
22	P	CN112145336-A	Anti-inclination wave energy conversion device for enhancing hidden inrush potential energy has lifting support mechanism which is arranged at floating support pad, and dark surge potential energy conversion mechanism is arranged below pad.	JIANG W	SHAOXING YASUO NEW ENERGY TECHNOLOGY CO (SHAO-Non-standard)	202103175A	NOVELTY - The device has floating support pads (1) which are used for floating on the water surface. A lifting support mechanism (2) is used to stably support the equipment on the water. An under surge potential energy conversion mechanism (4) used to promote the equipment to move more quickly with the help of the under surge, and a wave energy conversion mechanism (3) used to generate electricit…	Q54 (Non-positive displacement fluid engines (i.e. driven by fluid); Miscellaneous motors and machines for producing mechanical power/thrust (F03B,D,G,H)); X15 (Non-Fossil Fuel Power Generating Systems)	Q54-X; X15-C01	F03B-011/00; F03B-013/00; F03B-013/18	CN112145336-A 29 Dec 2020 F03B-013/18 202106 Pages: 11 Chinese	CN112145336-A CN11036958 28 Sep 2020	CN11036958 28 Sep 2020	DIIDW:202103175A
23	P	DE102010020219-B3	Wave energy converter has two main components, floating body which lies under water and generator buoy which floats on water, where generator buoy is connected with floating body over retractable rope.	GIMSA A	ENERLYT TECH GMBH (ENER-Non-standard)	2011M17956	NOVELTY - The wave energy converter has two main components, a floating body (1) which lies under water and a generator buoy (2) which floats on the water. The generator buoy is connected with the floating body over a retractable rope (4). A pivotal connection is formed between the generator buoy and the floating body. Three pair of legs are fixed at the generator buoy and at floating body in a h…	Q54 (Non-positive displacement fluid engines (i.e. driven by fluid); Miscellaneous motors and machines for producing mechanical power/thrust (F03B,D,G,H)); X15 (Non-Fossil Fuel Power Generating Systems)	X15-C01	F03B-013/18; F03B-013/20	DE102010020219-B3 29 Sep 2011 F03B-013/18 201165 Pages: 8 German	DE102010020219-B3 DE10020219 11 May 2010	DE10020219 11 May 2010	DIIDW:2011M17956
24	P	GB2522251-A; WO2015107158-A1; CA2936013-A1; AU2015207492-A1; KR2016128312-A; US2016333846-A1; CN106170624-A; EP3102818-A1; JP2017503116-W; AU2015207492-B2; ZA201604796-A; ID201709906-A; US10082127-B2; US2018355836-A1; JP6572238-B2; GB2522251-B; EP3102818-B1; KR2143265-B1; ES2808848-T3; CN106170624-B; CA2936013-C	Wave energy converter for extracting energy from ocean waves, has negative spring device which is provided between buoy and reference point applies positive force or no force in direction of displacement or in oscillatory motion.	TODALSHAUG J H	UNIV NORWEGIAN SCI & TECHNOLOGY (UNNW-C)	201541230J	NOVELTY - The converter (1) has a buoy (2) that is provided oscillates relative to a reference point (3) about an equilibrium position (4). A negative spring device (10) is connected between the buoy and the reference point. The negative spring device applies a positive force in the direction of displacement during movement of buoy away from equilibrium position. The negative spring device provid…	Q54 (Non-positive displacement fluid engines (i.e. driven by fluid); Miscellaneous motors and machines for producing mechanical power/thrust (F03B,D,G,H)); X15 (Non-Fossil Fuel Power Generating Systems)	X15-C01A1	F03B-013/18; F03B-013/20; F03B-000/00; F03B-013/16	GB2522251-A 22 Jul 2015 F03B-013/18 201549 Pages: 22 English	GB2522251-A GB000906 20 Jan 2014	GB000906 20 Jan 2014	DIIDW:201541230J
25	P	US11725622-B1; US2023265822-A1	Power packet network for wave energy converter arrays, has wave energy converters which are physically spaced with respect to each other and incoming water wave such that electrical power injected into collection bus from each of wave energy converters is phased with respect to each other.	VEURINK M G	UNIV MICHIGAN TECHNOLOGICAL (UNMT-C)	2023842835	NOVELTY - The network has an array of two or more wave energy converters (WEC1-WEC3). Each wave energy converter converts incoming water wave motion to electrical power that is injected into a collection bus. An energy storage system injects or absorbs electrical power into or from the collection bus. Each of the wave energy converters is physically spaced with respect to each other and the incom…	Q54 (Non-positive displacement fluid engines (i.e. driven by fluid); Miscellaneous motors and machines for producing mechanical power/thrust (F03B,D,G,H)); W01 (Telephone and Data Transmission Systems); X15 (Non-Fossil Fuel Power Generating Systems); X12 (Power Distribution/Components/Converters)	Q54-X; W01-A03B; W01-A06G2; X15-B03; X15-C01; X12-H01B; X12-H01D; X12-J	F03B-013/18; H02J-001/10; H02J-003/38; H02J-003/48; H02J-007/34	US11725622-B1 15 Aug 2023 F03B-013/18 202368 English	US11725622-B1 US675064 18 Feb 2022	US675064 18 Feb 2022	DIIDW:2023842835
26	P	US2007228737-A1; US7385301-B2	Wave-energy converting method, involves positioning wave energy conversion devices in wave medium, where each of wave energy conversion devices includes axle passing through magnetic sleeve, and attaching axles to platform.	HIRSCH W W	HIRSCH W W (HIRS-Individual)	2007814758	NOVELTY - The method involves positioning a set of wave energy conversion devices in a wave medium, where each of the devices includes an axle passing through a magnetic sleeve. A float member is coupled to the magnetic sleeve such that a wave moving through the wave medium displaces the float member. The axles are attached to a tidal platform, and the tidal platform is connected to a base. The t…	L03 (Electro-(in)organic - chemical features of conductors, resistors, magnets, capacitors and switches, electric discharge lamps, semiconductor and other materials, batteries, accumulators and thermoelectric devices, including fuel cells, magnetic recording media, radiation emission devices, liquid crystals and basic electric elements. Growing of single crystals of semiconductors and their dopin…	L03-H01; X15-C01	F03B-013/16; F03B-013/00; F03B-013/10; F03B-013/12; H02P-009/04	US2007228737-A1 04 Oct 2007 F03B-013/16 200776 Pages: 23 English	US2007228737-A1 US758221 05 Jun 2007	US703952 07 Nov 2003	DIIDW:2007814758
27	P	WO2016149779-A1; BR102015006362-A2	Wave energy converter for converting the mechanical energy of a wave, such as a sea wave, into electrical energy, has a float, a shaft, a pivot, magnetized portions provided with magnets, rod, coils and mounting structure.	VIEIRA TAVARES M	VIEIRA TAVARES M (TAVA-Individual)	201661335Q	NOVELTY - The wave energy converter has a float (802), a shaft (803), a pivot (804), magnetized portions (807) provided with magnets, rod (806), coils and mounting structure (809). An axle connects an electrical power generator component.	Q54 (Non-positive displacement fluid engines (i.e. driven by fluid); Miscellaneous motors and machines for producing mechanical power/thrust (F03B,D,G,H)); V06 (Electromechanical Transducers and Small Machines); X11 (Power Generation and High Power Machines); X15 (Non-Fossil Fuel Power Generating Systems)	Q54-X; V06-M10; X11-B; X11-J05X; X15-C01	F03B-013/18; H02K-007/06	WO2016149779-A1 29 Sep 2016 H02K-007/06 201666 Pages: 25	WO2016149779-A1 WOBR000029 22 Mar 2016	BR10006362 23 Mar 2015	DIIDW:201661335Q
28	P	EP3923438-A1; WO2021251880-A1; EP3923438-A4; US2023213015-A1	Method for determining arrangement of wave energy converters in wave power park in sea- or lake area, involves measuring wavelength and wave direction over period of time.	FRANCISCO F G A	SEABASED AB (SEAB-Non-standard)	2021E3085K	NOVELTY - The method involves measuring wavelength and wave direction over a period of time. The values measured for the wavelength and the wave direction in a matrix are collected. A predominant wavelength (PWL) and a predominant wave direction is statistically determined from the matrix. An amount X of wave energy converters at regular intervals over a distance that corresponds are arranged to …	Q42 (Hydraulic engineering, soil shifting and sewerage (E02, 3)); S05 (Electrical Medical Equipment); X12 (Power Distribution/Components/Converters); X15 (Non-Fossil Fuel Power Generating Systems)	Q42-A03; S05-D01C5A; X12-H01B; X12-J01J; X15-C01	E02B-009/00; H02J-003/38; E02B-009/08; F03B-013/12; F03B-013/18; H02K-007/18	EP3923438-A1 15 Dec 2021 H02J-003/38 202207 Pages: 12 English	EP3923438-A1 EP178668 08 Jun 2020	EP178668 08 Jun 2020	DIIDW:2021E3085K
29	P	GB2545406-A	Wave energy converter comprises a wave operated element that has a buoyant body to support a reaction mass, where energy conversion device is operatively connected to the wave operated element.	ADKINS N J	ADKINS N J (ADKI-Individual)	201741088A	NOVELTY - The wave energy converter comprises a wave operated element that has a buoyant body to support a reaction mass. An energy conversion device (1) is operatively connected to the wave operated element. A hydraulic pump provides hydraulic energy. The wave operated element is controlled by the energy conversion device.	Q54 (Non-positive displacement fluid engines (i.e. driven by fluid); Miscellaneous motors and machines for producing mechanical power/thrust (F03B,D,G,H)); X15 (Non-Fossil Fuel Power Generating Systems)	Q54-X; X15-C01	F03B-013/20	GB2545406-A 21 Jun 2017 F03B-013/20 201744 Pages: 10 English	GB2545406-A GB021779 10 Dec 2015	GB021779 10 Dec 2015	DIIDW:201741088A
30	P	US2018030953-A1; WO2018023051-A1; WO2018023051-A4; AU2017301747-A1; EP3491235-A1; JP2019526014-W; EP3491235-A4; US10669982-B2; HK40009229-A0; AU2017301747-B2; JP6966545-B2; EP3491235-B1; ES2908181-T3; HK40009229-A1	Wave energy converter for providing power in local environment such as offshore floating vessel, has paravane that is coupled to support structure and energy collection device is operatively coupled to paravane.	STAPELMANN F H	STAPELMANN F H (STAP-Individual)	201809135M	NOVELTY - The wave energy converter (1000c) has a support structure (200c) that comprises a first section, a second section is telescopically engaged to first section and a third section is telescopically engaged to second section. A paravane (100c) is rotationally and pivotably coupled to the support structure. An energy collection device is operatively coupled to the paravane. The first section…	Q54 (Non-positive displacement fluid engines (i.e. driven by fluid); Miscellaneous motors and machines for producing mechanical power/thrust (F03B,D,G,H)); X15 (Non-Fossil Fuel Power Generating Systems)	Q54-X; X15-C01B2	F03B-013/18; F03B-013/10; F03B-013/12; F03B-013/22; H02K-007/18	US2018030953-A1 01 Feb 2018 F03B-013/18 201811 Pages: 17 English	US2018030953-A1 US663353 28 Jul 2017	US368040P 28 Jul 2016	DIIDW:201809135M
31	P	US2014252766-A1; WO2014138215-A1	Wave energy converter e.g. point absorber wave energy converter using virtual added mass type system, has shape change mechanism attached to float that is selectively and controllably actuatable to increase float area acted on by water.	CLARK R P	LOCKHEED MARTIN CORP (LOCK-C)	2014R02672	NOVELTY - The converter (10) has a float (12) with a float area. A shape change mechanism (20) is attached to the float that is selectively and controllably actuatable to increase the float area that is acted on by the water. The shape change mechanism has several pivoted flaps (22), such that the flaps are pivotally mounted to pivot between the fully open position and the fully closed position.	Q54 (Non-positive displacement fluid engines (i.e. driven by fluid); Miscellaneous motors and machines for producing mechanical power/thrust (F03B,D,G,H)); X15 (Non-Fossil Fuel Power Generating Systems)	X15-C01	F03B-013/14; F03B-013/16; F03B-013/18	US2014252766-A1 11 Sep 2014 F03B-013/14 201462 Pages: 9 English	US2014252766-A1 US196138 04 Mar 2014	US774701P 08 Mar 2013	DIIDW:2014R02672
32	P	US2011285128-A1; US8102065-B2	Wave energy converter has generator which is connected to motor for turning generator to produce electrical energy and pendulum adjusting unit that is connected to pendulum for changing position of center of gravity of pendulum.	HOBDY M	HOBDY M (HOBD-Individual)	2011P47834	NOVELTY - The energy converter (100) has a pendulum (15) which is pivotally positioned in the case (1). A link is pivotally connected to pendulum. The piston is pivotally connected to link. A hydraulic rectifier is connected to the actuator. A motor is connected to hydraulic rectifier, and is driven by hydraulic fluid pumped by actuator through hydraulic rectifier. A generator is connected to mot…	Q54 (Non-positive displacement fluid engines (i.e. driven by fluid); Miscellaneous motors and machines for producing mechanical power/thrust (F03B,D,G,H)); X13 (Switchgear, Protection, Electric Drives); X15 (Non-Fossil Fuel Power Generating Systems)	X13-F; X13-G; X15-C01	F03B-013/20; H02P-009/04; H02P-009/14	US2011285128-A1 24 Nov 2011 H02P-009/04 201178 Pages: 20 English	US2011285128-A1 US193973 29 Jul 2011	US271743 14 Nov 2008	DIIDW:2011P47834
33	P	WO2009076712-A1; TW200934954-A; AU2008338244-A1; EP2232055-A1; CA2709742-A1; KR2010102650-A; MX2010006725-A1; JP2011506828-W; CN101970855-A; ZA201004440-A; IN201004629-P1; AU2008338244-B2; US2012102938-A1; NZ586634-A; JP5475681-B2; CN101970855-B; IL206427-A; BR200819527-A2; EP2232055-B1; US9103315-B2; EP2232055-B8; ID201200457-A; EP2232055-A4	Buoyant actuator for wave-energy conversion system, has outer casing that is provided with several pentagonal and hexagonal facets.	BURNS A R	SEAPOWER PACIFIC PTY LTD (SEAP-Non-standard)	2009K64640	NOVELTY - The actuator (19) has outer casing that is provided with several pentagonal and hexagonal facets (101). An internal support structure comprises central core and struts extending radially from the central core.	Q54 (Non-positive displacement fluid engines (i.e. driven by fluid); Miscellaneous motors and machines for producing mechanical power/thrust (F03B,D,G,H)); Q66 (Valves, taps, cocks, vents (F16K)); X15 (Non-Fossil Fuel Power Generating Systems)	X15-C01	F03B-013/10; F03B-013/14; F16K-033/00; H02P-009/04; F03B-013/12; F03B-017/02; F03B-000/00; F16K-000/00; H02P-000/00; F03B-013/18; F04B-017/00	WO2009076712-A1 25 Jun 2009 F03B-013/14 200943 Pages: 60 English	WO2009076712-A1 WOAU001853 17 Dec 2008	AU906886 17 Dec 2007	DIIDW:2009K64640
34	P	EP3456956-A1	Method of controlling wave energy converter for extracting energy from ocean waves, involves adjusting amplitude of absorber oscillating movement towards desired amplitude by selectively connecting and disconnecting inertia device.	ASGEIRSSON G S	CORPOWER OCEAN AB (CORP-Non-standard)	2019257259	NOVELTY - The method involves converting the oscillating movement of the absorber into a rotational movement of the rotational shaft (8a,8b,8c) by means of the power-take-off device (4). The actual frequency and the actual amplitude of the incident ocean waves are detected. A desired resonance frequency of the wave energy converter and desired amplitude of the absorber's oscillating motion are ca…	Q54 (Non-positive displacement fluid engines (i.e. driven by fluid); Miscellaneous motors and machines for producing mechanical power/thrust (F03B,D,G,H)); X15 (Non-Fossil Fuel Power Generating Systems)	Q54-X; X15-C01; X15-C03	F03B-013/18; F03B-015/00	EP3456956-A1 20 Mar 2019 F03B-013/18 201923 Pages: 26 English	EP3456956-A1 EP191507 16 Sep 2017	EP191507 16 Sep 2017	DIIDW:2019257259
35	P	WO2017095347-A1; TR201515349-A	Power take-off system for transferring power from power sources to an electrical generator in floating or stationary platforms, comprises a modular wave energy converter provided in a hollow channel for converting the wave energy.	ARISOY Y	UNIV DOKUZ EYLUL REKTORLUGU (UYDO-Non-standard)	2017365799	NOVELTY - The power take-off system comprises a floating platform that is anchored by an anchor block and has restricted movement. A steel cable connects the floating platform and the anchor blocks. Another platform is installed to the off-shore wind turbine tower to provide additional energy capacity. A modular wave energy converter (5) is provided for converting the wave energy. A hollow channe…	A88 (Mechanical engineering and tools e.g. valves, gears and conveyor belts.); Q54 (Non-positive displacement fluid engines (i.e. driven by fluid); Miscellaneous motors and machines for producing mechanical power/thrust (F03B,D,G,H)); X15 (Non-Fossil Fuel Power Generating Systems)	A12-H; Q54-X; X15-C01A1; X15-C01B2; X15-C01C	F03B-013/18; F03B-001/00	WO2017095347-A1 08 Jun 2017 F03B-013/18 201740 Pages: 26 English	WO2017095347-A1 WOTR050414 01 Nov 2016	TR015349 03 Dec 2015	DIIDW:2017365799
36	P	WO2011098894-A2; WO2011098894-A3	Wave energy converter for extracting energy from water waves of e.g. sea to generate electricity has elongated inverted channel shaped chamber fixed relative to the land and occupies a part of the surf area of the sea.	SWART E C	SWART E C (SWAR-Individual)	2011K57593	NOVELTY - The wave energy converter (1) has an elongated horizontal inverted channel shaped chamber (2) extending from an outer end (5) to an inner end (7) in a general direction from which a succession of water waves (6) moves. The chamber has a water inlet at its outer end directed towards oncoming succession of waves, a top, a pair of opposite side walls and an outlet (14) for air under pressu…	Q54 (Non-positive displacement fluid engines (i.e. driven by fluid); Miscellaneous motors and machines for producing mechanical power/thrust (F03B,D,G,H)); X15 (Non-Fossil Fuel Power Generating Systems)	X15-C01	F03B-000/00; F03B-013/14; F03B-013/24; F03B-013/26	WO2011098894-A2 18 Aug 2011 201155 Pages: 18 English	WO2011098894-A2 WOIB000234 10 Feb 2011	ZA001001 11 Feb 2010	DIIDW:2011K57593
37	P	CN113309656-A; CN113309656-B	Micro wind wave energy conversion collecting device, comprises power transmission ball passage that arranged in regular polyhedron floating box and vertical to box wall of regular polyhedron floating box, and impact component is arranged.	LI Y	UNIV SHANDONG JIAOTONG (SDJT-C)	2021A2461F	NOVELTY - The micro wind wave energy conversion collecting device comprises a power transmission ball passage that arranged in a regular polyhedron floating box and vertical to a box wall of the regular polyhedron floating box. An impact component is arranged in the power transmission ball passage for reciprocating movement in the power transmission ball passage when the front polyhedral floating…	Q54 (Non-positive displacement fluid engines (i.e. driven by fluid); Miscellaneous motors and machines for producing mechanical power/thrust (F03B,D,G,H)); V06 (Electromechanical Transducers and Small Machines); X15 (Non-Fossil Fuel Power Generating Systems)	Q54-G; Q54-X; V06-M06D2; X15-B01; X15-B05; X15-C01	F03B-013/16; F03B-015/00; F03D-005/00; F03D-007/00; H02N-002/18; H02J-007/32	CN113309656-A 27 Aug 2021 F03B-013/16 202175 Pages: 14 Chinese	CN113309656-A CN10867494 30 Jul 2021	CN10867494 30 Jul 2021	DIIDW:2021A2461F
38	P	US2018230961-A1; US10352290-B2	Surface-riding cylinder for use in wave energy conversion farm, has center rod arranged along axis of outer cylinder, electrically-conductive windings arranged about inner circumference of outer cylinder, and magnet arranged on center rod.	KANG H	UNIV TEXAS A & M SYSTEM (UTAM-C)	201863423V	NOVELTY - The cylinder (100) has a center rod arranged along an axis of an outer cylinder. A set of electrically-conductive windings is arranged about an inner circumference of the outer cylinder. A magnet is slidably arranged on the center rod. A buoyancy shell is arranged outwardly of the outer cylinder. A first moveable ring weight is slidably arranged along an axis of the center rod. A second…	Q54 (Non-positive displacement fluid engines (i.e. driven by fluid); Miscellaneous motors and machines for producing mechanical power/thrust (F03B,D,G,H)); X15 (Non-Fossil Fuel Power Generating Systems)	Q54-X; X15-C01	F03B-011/06; F03B-013/18; F03B-015/00; F03B-013/20	US2018230961-A1 16 Aug 2018 F03B-013/18 201856 Pages: 10 English	US2018230961-A1 US896335 14 Feb 2018	US458884P 14 Feb 2017	DIIDW:201863423V
39	P	WO2012054152-A1; AU2011318469-A1; EP2630365-A1; US2013269333-A1	Full water column surge type wave energy converter for capture and conversion of wave energy, has power-takeoff (PTO) subsystem that exerts force on paddle such that amplitude of oscillation is reduced.	OLIVIER CEBERIO O	WILLIAMS A R (WILL-Individual)	2012E84518	NOVELTY - The wave energy converter has a substantially rectangular paddle (14,16,17) which is positioned to expose its two faces to local water motion caused by wave action near the surface of a body of water (20). The paddle oscillates in response to variations in the net pressure on the paddle caused by the wave action. The amplitude of the oscillation is reduced, relative to the amplitude of …	Q54 (Non-positive displacement fluid engines (i.e. driven by fluid); Miscellaneous motors and machines for producing mechanical power/thrust (F03B,D,G,H)); X15 (Non-Fossil Fuel Power Generating Systems)	X15-C01	F03B-013/18	WO2012054152-A1 26 Apr 2012 F03B-013/18 201230 Pages: 41 English	WO2012054152-A1 WOUS051642 14 Sep 2011	US405287P 21 Oct 2010	DIIDW:2012E84518
40	P	WO2018150387-A1; ZA201904854-A	Wave energy conversion device for use in wave energy conversion plant, has fluid pump connected between wave-absorbing vane and vane receiving formation to translate pivotal displacement of wave-absorbing vane into reciprocating pump action.	SWANA M S	SWANA M S (SWAN-Individual)	201865840M	NOVELTY - The device (11) has a support structure (13) includes a vane receiving formation (15), which is operatively raised from an ocean floor and to which a wave-absorbing vane (12) is pivotally connected in a configuration in which the wave-absorbing vane depends from the vane receiving formation and extends toward the ocean floor such that the wave-absorbing vane is partially submerged in wa…	Q54 (Non-positive displacement fluid engines (i.e. driven by fluid); Miscellaneous motors and machines for producing mechanical power/thrust (F03B,D,G,H)); X15 (Non-Fossil Fuel Power Generating Systems)	Q54-X; X15-C01	F03B-013/14; F03B-013/18; F03B-000/00	WO2018150387-A1 23 Aug 2018 F03B-013/18 201857 Pages: 17 English	WO2018150387-A1 WOIB051001 19 Feb 2018	ZA001236 20 Feb 2017	DIIDW:201865840M
41	P	WO2018053602-A1; CA3037057-A1; AU2017331811-A1; KR2019067796-A; CN109891087-A; SG11201902253-A1; IN201917014775-A; EP3516206-A1; JP2019529779-W; US2020018281-A1; EP3516206-A4	Wave energy converter for converting energy provided by wave in body of water into electrical energy, has body that is configured to float in water, where converting unit converts swinging of pendulum relative to body into electrical energy.	SINCOCK P	AMOG TECHNOLOGIES PTY LTD (AMOG-Non-standard)	201825692D	NOVELTY - The wave energy converter (10) comprises a body (12) that is configured to float in water. A pendulum (14) is supported by the body and configured to swing in response to rolling and pitching of the body. An energy converting unit (16) is associated with the pendulum and configured to convert swinging of the pendulum relative to the body into electrical energy. A pendulum adjusting unit…	Q54 (Non-positive displacement fluid engines (i.e. driven by fluid); Miscellaneous motors and machines for producing mechanical power/thrust (F03B,D,G,H)); X15 (Non-Fossil Fuel Power Generating Systems)	Q54-X; X15-C01	F03B-013/14; F03B-013/20; F03G-003/06; F03G-007/08; H02K-035/02	WO2018053602-A1 29 Mar 2018 F03B-013/20 201825 Pages: 35 English	WO2018053602-A1 WOAU051043 25 Sep 2017	AU903861 23 Sep 2016	DIIDW:201825692D
42	P	WO2017189455-A1; US2019145373-A1; US10767618-B2	Submerged wave energy converter apparatus for deep water operations for renewable electricity generation, comprises absorber body that has upper and bottom surface, where the ballast system is connected to the support base.	ALAM M	UNIV CALIFORNIA (REGC-C)	201774420C	NOVELTY - The submerged wave energy converter (10) comprises a planar horizontally oriented absorber body (12) that has the upper surface and bottom surface. A support base is disposed beneath the bottom surface of the absorber body. A damper compresses or expands the movement of the absorber body relative to the support base. A linear motion energy converter is connected to the damper. A restori…	Q54 (Non-positive displacement fluid engines (i.e. driven by fluid); Miscellaneous motors and machines for producing mechanical power/thrust (F03B,D,G,H)); X11 (Power Generation and High Power Machines); X15 (Non-Fossil Fuel Power Generating Systems); X26 (Lighting)	Q54-X; X11-B; X15-C01; X26-A	F03B-013/18; F03B-013/14; F03B-013/20	WO2017189455-A1 02 Nov 2017 F03B-013/18 201776 Pages: 50 English	WO2017189455-A1 WOUS029195 24 Apr 2017	US326814P 24 Apr 2016	DIIDW:201774420C
43	P	US10844830-B1	Wave energy converter for extracting energy from ocean waves, includes a pair of pistons to use a differential pressure to extract energy from a wave, where wave passing above wave energy converter is positioned below the surface on seabed.	WANNI A S	WANNI A S (WANN-Individual)	2020B5850X	NOVELTY - The wave energy converter (100) includes a pair of pistons configured to use a differential pressure to extract energy from a wave transiting on a surface of a body of water, where the wave passing above the wave energy converter is positioned below the surface on a seabed. A vessel (101) defines a water receiving port (106) configured to permit a flow of water into and out of the vesse…	Q42 (Hydraulic engineering, soil shifting and sewerage (E02, 3)); Q54 (Non-positive displacement fluid engines (i.e. driven by fluid); Miscellaneous motors and machines for producing mechanical power/thrust (F03B,D,G,H)); X15 (Non-Fossil Fuel Power Generating Systems)	Q42-A03; Q54-X; X15-C01	E02B-009/08; F03B-013/14	US10844830-B1 24 Nov 2020 F03B-013/14 202097 Pages: 21 English	US10844830-B1 US714715 14 Dec 2019	US714715 14 Dec 2019	DIIDW:2020B5850X
44	P	WO2016120599-A1; EP3250815-A1; US2017363058-A1; EP3250815-B1; US10344737-B2	Wave energy converter for converting energy from waves on water into electrical energy, has a buoyant structure, which floats on water, a generator drive mechanism on board the buoyant structure and having a rotational input drive shaft.	ETHERINGTON S D	AQUA POWER TECHNOLOGIES LTD (AQUA-Non-standard)	2016480378	NOVELTY - The wave energy converter has a buoyant structure (2), which floats on water, a generator, a generator drive mechanism on board the buoyant structure and having a rotational input drive shaft and a rotational output drive shaft. A drive element is operably connected to the input drive shaft. The drive element is moveable back and forth between a first position and a second position.	Q54 (Non-positive displacement fluid engines (i.e. driven by fluid); Miscellaneous motors and machines for producing mechanical power/thrust (F03B,D,G,H)); X15 (Non-Fossil Fuel Power Generating Systems)	Q54-X; X15-C01	F03B-013/20; B63B-001/10; B63B-035/44; B63B-039/03; H02K-007/075; H02K-007/18; F03B-013/00	WO2016120599-A1 04 Aug 2016 F03B-013/20 201653 Pages: 49 English	WO2016120599-A1 WOGB050154 26 Jan 2016	GB001356 27 Jan 2015	DIIDW:2016480378
45	P	US2021404436-A1	Method for operating wave energy converter for deep water operations, involves determining tension on mooring line of set of mooring lines to manage load exerted on wave energy converter, and adjusting tension of mooring line to tension determined by controller.	MURRAY B	UNIV CALIFORNIA (REGC-C)	202201275G	NOVELTY - The method involves receiving data from sensors integrated into a wave energy converter at a controller. Tension on a mooring line is determined by the controller to manage a load exerted on the wave energy converter based on the data from the sensors. Tension of the mooring line is adjusted to the tension determined by the controller, where adjusting the tension is performed by a winch…	Q54 (Non-positive displacement fluid engines (i.e. driven by fluid); Miscellaneous motors and machines for producing mechanical power/thrust (F03B,D,G,H)); T01 (Digital Computers); X15 (Non-Fossil Fuel Power Generating Systems)	Q54-X; T01-J08A; X15-C01	F03B-013/14; F03B-013/18; F03B-013/10	US2021404436-A1 30 Dec 2021 F03B-013/10 202203 English	US2021404436-A1 US219261 31 Mar 2021	US489386P 24 Apr 2017	DIIDW:202201275G
46	P	PT109985-A1	Wave energy conversion device for converting wave energy into mechanical energy, comprises main structure, wave energy utilization system and mooring system, where wave energy is captured in rising phase or in descending phase of wave.	DA ROCHA A B	AUGUSTO BARATA DA ROCHA (AUGU-Non-standard)	2018883815	NOVELTY - The wave energy conversion device comprises a main structure, a wave energy utilization system and a mooring system. The wave energy is captured in the rising phase or in the descending phase of the wave.	Q54 (Non-positive displacement fluid engines (i.e. driven by fluid); Miscellaneous motors and machines for producing mechanical power/thrust (F03B,D,G,H)); X15 (Non-Fossil Fuel Power Generating Systems)	Q54-X; X15-C01	F03B-013/14	PT109985-A1 21 Sep 2018 F03B-013/14 201878 Pages: 1	PT109985-A1 PT109985 21 Mar 2017	PT109985 21 Mar 2017	DIIDW:2018883815
47	P	US2002078687-A1	Ocean wave energy conversion apparatus includes helical structures which are wound around shaft-pipe axle, having blade impellers with impeller blades perpendicular to shaft-pipe axle.	DONNELLY F M	DONNELLY F M (DONN-Individual)	2003754991	NOVELTY - The ocean wave energy conversion apparatus has a shaft-pipe axle (70) supported on a catamaran-type pontoons (40) with the shaft-pipe held at the water surface. Helical structures (20) which are wound around the shaft-pipe axle, has several blade impellers (30) with impeller blades perpendicular to the shaft-pipe axle.	Q55 (Positive displacement fluid machines/pumps/compressors (i.e. for driving fluid) (F04B,C)); X15 (Non-Fossil Fuel Power Generating Systems)	X15-C01	F03C-031/02	US2002078687-A1 27 Jun 2002 F03C-031/02 200371 Pages: 14 English	US2002078687-A1 US745957 21 Dec 2000	US745957 21 Dec 2000	DIIDW:2003754991
48	P	KR1533090-B1	Attenuating hybrid photovoltaic (PV) wave energy converting device has influx hose whose upper end portion is connected with outflow hose, and turbine that is rotated with second fluid transferred from outflow hose.	CHA K H	KOREA ATOMIC ENERGY RES INST (KAER-C)	201538873X	NOVELTY - The device (1000) has an influx hose (500) whose upper end portion is connected with outflow hose (300). The density of second fluid is lower than density of first fluid. Second fluid taken in contraction state from multiple balloons is filled to the outflow hose. A turbine is rotated with second fluid transferred from the outflow hose, and electricity is generated by power generation m…	X15 (Non-Fossil Fuel Power Generating Systems)	X15-A02	H02S-010/00	KR1533090-B1 02 Jul 2015 H02S-010/00 201547 Pages: 13	KR1533090-B1 KR064925 29 May 2014	KR064925 29 May 2014	DIIDW:201538873X
49	P	CN102691610-A; CN102691610-B	Center float-type wave energy power generating device has connecting portion which is provided on outer side wall of central big floating main portion to which oscillating wave energy converting devices are uniformly distributed.	CAO S	UNIV SHANGHAI OCEAN (USHO-C)	2012Q35423	NOVELTY - The center float-type wave energy power generating device has a central big floating main portion (1), a connector (4) and several independent oscillating wave energy converting devices (5). The independent oscillating wave energy converting devices are arranged and uniformly distributed around the central big floating main portion. A connecting portion is provided on an outer side wall…	Q54 (Non-positive displacement fluid engines (i.e. driven by fluid); Miscellaneous motors and machines for producing mechanical power/thrust (F03B,D,G,H)); X15 (Non-Fossil Fuel Power Generating Systems)	X15-C01	F03B-013/16	CN102691610-A 26 Sep 2012 F03B-013/16 201312 Chinese	CN102691610-A CN10213721 26 Jun 2012	CN10213721 26 Jun 2012	DIIDW:2012Q35423
50	P	CN109274288-A; CN109274288-B	Piezoelectric wave energy converting device with slide rod floating mechanism, has wave energy conversion mechanical energy device that is located in floating tank and energy capturing structure that is located on floating tank.	LIU M	UNIV HARBIN ENGINEERING (UHEG-C)	2019117015	NOVELTY - The device has a floating tank, a wave energy converting mechanical energy device (5) and an energy capturing structure (4). The wave energy conversion mechanical energy device is located in the floating tank. The energy capturing structure is located on the inner surface of the floating tank. A floating box structure is provided with a base (2) and a box structure. The box structure is…	Q54 (Non-positive displacement fluid engines (i.e. driven by fluid); Miscellaneous motors and machines for producing mechanical power/thrust (F03B,D,G,H)); V06 (Electromechanical Transducers and Small Machines); X15 (Non-Fossil Fuel Power Generating Systems)	Q54-X; V06-M06D; V06-U04B; V06-V01E; X15-C01	F03B-013/14; H02N-002/18	CN109274288-A 25 Jan 2019 H02N-002/18 201925 Pages: 12 Chinese	CN109274288-A CN10966702 23 Aug 2018	CN10966702 23 Aug 2018	DIIDW:2019117015
51	P	CN103089530-A; CN103089530-B	Wave energy converting device for wave energy converting system, has floating body connected with piston pump and piston for realizing high pressure water flow discharging process along reciprocating movement.	XU Z	XU Z (XUZZ-Individual)	2013Q62881	NOVELTY - The device has a driving device unit connected with a floating body (100) that is connected with a piston pump (300). A heavy object underwater sunk unit (400) is provided with another floating body (200). A top end of the latter floating body is fixed with the piston pump. A bottom end of the piston pump is connected with the heavy object underwater sunk unit through a traction rope (6…	Q54 (Non-positive displacement fluid engines (i.e. driven by fluid); Miscellaneous motors and machines for producing mechanical power/thrust (F03B,D,G,H)); X15 (Non-Fossil Fuel Power Generating Systems)	X15-C01	F03B-013/16	CN103089530-A 08 May 2013 F03B-013/16 201366 Pages: 12 Chinese	CN103089530-A CN10339350 01 Nov 2011	CN10339350 01 Nov 2011	DIIDW:2013Q62881
52	P	GB2544724-A	Wave energy converter, has hull volume and module to vary that hull volume on command in response to prevailing wave conditions.	DICKENS E	QUOCEANT LTD (QUOC-Non-standard)	2017347001	NOVELTY - The converter has a hull volume and a module to vary that hull volume on command in response to prevailing wave conditions. The converter has a rigid, load-bearing core. The core has a first volume and the inflatable structures (2) collectively have a second maximum volume which is equal to the first volume. The inflatable structures are automatically stowable on command in response to …	Q54 (Non-positive displacement fluid engines (i.e. driven by fluid); Miscellaneous motors and machines for producing mechanical power/thrust (F03B,D,G,H)); X15 (Non-Fossil Fuel Power Generating Systems)	Q54-X; X15-C01	F03B-013/14; F03B-013/20	GB2544724-A 31 May 2017 F03B-013/20 201738 Pages: 18 English	GB2544724-A GB019151 30 Oct 2015	GB019151 30 Oct 2015	DIIDW:2017347001
53	P	CN101649802-A; CN101649802-B	Flexible wave energy converting device for flexible wave energy converting system, has main flow pipe connected with one-way output valve on each of flexible converting units to collect high pressure medium stream.	XU X	XU X (XUXX-Individual)	2010C43589	NOVELTY - The device has multiple flexible converting units provided below a rigid flat plate, where each converting unit is formed with an upper cavity and a lower cavity, which are isolated by a rigid separating layer. The upper cavity is provided with a flexible sidewall and a rigid top plate that is fixedly connected with the rigid flat plate. An inlet of the rigid top plate is connected with…	A88 (Mechanical engineering and tools e.g. valves, gears and conveyor belts.); Q54 (Non-positive displacement fluid engines (i.e. driven by fluid); Miscellaneous motors and machines for producing mechanical power/thrust (F03B,D,G,H)); X15 (Non-Fossil Fuel Power Generating Systems)	A12-H02; A12-H07; X15-C01	F03B-013/14	CN101649802-A 17 Feb 2010 F03B-013/14 201021 Pages: 16 Chinese	CN101649802-A CN10142439 15 Aug 2008	CN10142439 15 Aug 2008	DIIDW:2010C43589
54	P	US2023175470-A1; CN116241406-A; EP4206458-A2; TW202323659-A; US11719217-B2; EP4206458-A3	Multi-axial wave energy conversion device for converting wave energy into electricity, has driving component whose movement relative to arm drives permanent magnet generator and hydraulic generator to generate electricity.	WENG C	FLH ENERGY TECHNOLOGY LTD (FLHE-Non-standard)	202358776B	NOVELTY - The device has a main body coupled to a carrier, and a wave energy conversion assembly coupled to the main body. The assembly has an electricity generator with a permanent magnet generator disposed between an arm and a driving component. A hydraulic generator is disposed between the magnet generator and the arm. The driving component is driven to move by waves relative to the arm, where…	Q54 (Non-positive displacement fluid engines (i.e. driven by fluid); Miscellaneous motors and machines for producing mechanical power/thrust (F03B,D,G,H)); X15 (Non-Fossil Fuel Power Generating Systems)	Q54-X; X15-C01	F03B-013/16; F03B-015/00; F03B-013/18; F03B-013/14; F03B-013/20	US2023175470-A1 08 Jun 2023 F03B-013/16 202351 English	US2023175470-A1 US714133 05 Apr 2022	TW145640 07 Dec 2021	DIIDW:202358776B
55	P	CN201982237-U	Wave energy conversion device for use in wave energy conversion system, has air inlet provided with admission single valve, air outlet provided with exhaust single valve, and cylinder body fixed with floating box.	XIE L	CHINA INT CONTAINER SHIPPING CO LTD (CIMC-C)	2011N24207	NOVELTY - The device has a compressed air generator provided with a hollow cylinder body. The compressed air generator is connected to a floating box. A sealed air chamber is provided with an air inlet and an air outlet. The air inlet is provided with an admission single valve. The air outlet is provided with an exhaust single valve. The cylinder body is fixed with a floating box. The air inlet a…	Q54 (Non-positive displacement fluid engines (i.e. driven by fluid); Miscellaneous motors and machines for producing mechanical power/thrust (F03B,D,G,H)); X15 (Non-Fossil Fuel Power Generating Systems)	X15-C01	F03B-013/24	CN201982237-U 21 Sep 2011 F03B-013/24 201170 Pages: 16 Chinese	CN201982237-U CN20089006 30 Mar 2011	CN20089006 30 Mar 2011	DIIDW:2011N24207
56	P	US2014265339-A1; WO2014145404-A2; WO2014145404-A3; US9074577-B2; AU2014233070-A1; EP2971754-A2; AU2014233070-B2; AU2017200610-A1; EP2971754-A4; AU2017200610-B2	Wave energy converter system for converting wave energy into electricity, has pods that reacts against U-shaped structure through power converters, and displacement of pods drives converter to facilitate generation of electricity.	DEHLSEN J G P	DEHLSEN J G P (DEHL-Individual)	2014T42636	NOVELTY - The system (100) has a U-shaped structure (110) that is provided with a buoyancy chamber (112A,112B) at each end. Support frame (140A,140B) is coupled to each chamber. Several interconnected pods (120A-120N) are coupled to react against U-shaped structure through one of power converters (130A-130N). First cable (181) is provided to couple one end of pods to support frames. Second cable …	Q54 (Non-positive displacement fluid engines (i.e. driven by fluid); Miscellaneous motors and machines for producing mechanical power/thrust (F03B,D,G,H)); X15 (Non-Fossil Fuel Power Generating Systems)	X15-C01	F03B-013/18; F03B-013/10; F03B-013/14; F03B-013/12; H02P-009/04	US2014265339-A1 18 Sep 2014 F03B-013/18 201469 Pages: 16 English	US2014265339-A1 US841931 15 Mar 2013	US841931 15 Mar 2013	DIIDW:2014T42636
57	P	CN210738732-U; CN111852736-A	Piezoelectric-type electromagnetic wave energy converting device for bridge pier, has floating body sleeved on outer side of floating sleeve, and piezoelectric film connected with charging battery or illuminating lamp or warning device.	ZHANG H	UNIV ZHEJIANG OCEAN (UYZO-C)	202055216R	(CN210738732-U) NOVELTY - The utility model claims a pier of the piezoelectric-electromagnetic wave energy converting device, comprising a floating body sleeved serpentine wire of buoyancy sleeve outside the pier, sleeved outside the coiled wire is sleeved outside the floating sleeve, wherein, the outer surface of the buoyancy sleeve provided with a piezoelectric film, the convex floating sleeve …	Q54 (Non-positive displacement fluid engines (i.e. driven by fluid); Miscellaneous motors and machines for producing mechanical power/thrust (F03B,D,G,H)); V06 (Electromechanical Transducers and Small Machines); W05 (Alarms, Signalling, Telemetry and Telecontrol); X11 (Power Generation and High Power Machines); X15 (Non-Fossil Fuel Power Generating Systems)	Q54-X; V06-M04; V06-M06D; V06-U04B; V06-V01E; W05-A03A; X11-B01; X15-C01	F03B-011/00; F03B-013/18; H02K-035/02; H02N-002/18	CN210738732-U 12 Jun 2020 F03B-013/18 202051 Pages: 7 Chinese	CN210738732-U CN21658634 30 Sep 2019	CN10943088 30 Sep 2019	DIIDW:202055216R
58	P	WO2022093909-A1; US2022136481-A1; US2022275784-A1; US11448179-B2; AU2021368562-A1; US11692524-B2; EP4237682-A1; US2023349353-A1	Wave energy converter i.e. floating wave-energy-converter buoy, has wave reflecting barrier spaced from and encircling converter, and circumferentially spaced connectors rigidly attaching barrier to converter.	FILIP G P	LONE GULL HOLDINGS LTD (LONE-Non-standard)	202258793D	NOVELTY - The improved wave energy converter has a wave reflecting barrier spaced from and encircling the wave energy converter. The wave reflecting barrier has a height that is greater than a height of the upper component as measured from the upper component highest surface to its lowest surface and less than a height of the lower component as measured from the lower component highest surface to…	Q42 (Hydraulic engineering, soil shifting and sewerage (E02, 3)); Q54 (Non-positive displacement fluid engines (i.e. driven by fluid); Miscellaneous motors and machines for producing mechanical power/thrust (F03B,D,G,H)); X15 (Non-Fossil Fuel Power Generating Systems)	Q42-A03; Q54-X; X15-C01A1	E02B-003/06; E02B-009/00; E02B-009/08; F03B-013/12; F03B-013/14; F03B-013/16; F03B-013/20; F03B-013/22; B63B-035/44; F03B-013/10	WO2022093909-A1 05 May 2022 F03B-013/14 202239 Pages: 81 English	WO2022093909-A1 WOUS056773 27 Oct 2021	US107451P 30 Oct 2020	DIIDW:202258793D
59	P	CN110040230-A; CN110040230-B	Marine vehicle for converting wave energy into low frequency pitching movement propulsion, has wave energy conversion hydrofoil for converting wave energy into navigation power, and equipment compartment for loading marine monitoring tools.	SHEN H	UNIV HARBIN ENGINEERING (UHEG-C)	201966242G	NOVELTY - The vehicle has a wave energy absorption device and a wave energy storage device fixed in an equipment compartment. A wave energy conversion hydrofoil is fixed in the equipment compartment. The wave energy absorption device absorbs wave energy. The wave energy storage device stores wave energy absorbed by the wave energy absorption device. The wave energy conversion hydrofoil converts w…	W06 (Aviation, Marine and Radar Systems); X15 (Non-Fossil Fuel Power Generating Systems)	W06-C01B1; W06-C01C; W06-C07A; X15-C01	B63H-001/36; B63H-019/02; F03B-013/20	CN110040230-A 23 Jul 2019 B63H-001/36 201968 Pages: 11 Chinese	CN110040230-A CN10342812 26 Apr 2019	CN10342812 26 Apr 2019	DIIDW:201966242G
60	P	GB2491026-A; DE102011109877-A1	Wave energy machine for generating mechanical, chemical or electrical energy includes a damping device that converts energy of the pressure medium and which is controllable based on the volume flow of the pressure medium.	KAMIZURU Y	BOSCH GMBH ROBERT (BOSC-C)	2012Q06355	NOVELTY - The wave energy machine has wave energy converters (1a-1e) that convert wave energy into energy of a central volume flow of a pressure medium with a damping device. The damping device is controllable based on the volume flow. The wave energy converters are connected through connecting lines (2a-2e) to a common main line (12a-12d) which has the volume flow.	Q54 (Non-positive displacement fluid engines (i.e. driven by fluid); Miscellaneous motors and machines for producing mechanical power/thrust (F03B,D,G,H)); X15 (Non-Fossil Fuel Power Generating Systems)	X15-C01	F03B-013/18; F03B-013/14	GB2491026-A 21 Nov 2012 F03B-013/18 201278 Pages: 19 English	GB2491026-A GB008608 15 May 2012	DE10101649 16 May 2011	DIIDW:2012Q06355
61	P	GB2472093-A; WO2011010102-A2; WO2011010102-A3; GB2472093-B; CA2768539-A1; AU2010274817-A1; EP2456972-A2; US2012187689-A1; ZA201201260-A; JP2013500420-W; NZ598207-A; EP2456972-B1	Wave energy conversion apparatus for extracting energy from wave power, has fluid pressurization system which is arranged so that fluid in fluid pressurization system is pressurized in response to movement of flap portion.	CROWLEY M D	AQUAMARINE POWER LTD (AQUA-Non-standard)	2011B15782	NOVELTY - The wave energy conversion apparatus includes a flap portion (5) which is arranged in operation to move repeatedly in a cycle in response to wave motion. A power extraction unit is arranged to extract energy from the movement of the flap portion. The power extraction unit comprises a fluid pressurization system which is arranged so that fluid in fluid pressurization system is pressurize…	Q54 (Non-positive displacement fluid engines (i.e. driven by fluid); Miscellaneous motors and machines for producing mechanical power/thrust (F03B,D,G,H)); X15 (Non-Fossil Fuel Power Generating Systems)	X15-C01	F03B-013/18; F03B-013/16; F03B-013/22; F03B-000/00	GB2472093-A 26 Jan 2011 F03B-013/18 201110 Pages: 27 English	GB2472093-A GB012922 24 Jul 2009	GB012922 24 Jul 2009	DIIDW:2011B15782
62	P	WO2014094979-A1; DE102013005040-A1	Method for operating wave energy converter in water body, involves determining variable influencing cavitation at one movable element of wave energy converter, where minimum total pressure is determined at one point on movable element.	HAGEMANN B	BOSCH GMBH ROBERT (BOSC-C)	2014M18255	NOVELTY - The method involves determining a variable influencing the cavitation at one movable element of the wave energy converter. A total pressure, particularly a minimum total pressure is determined at one point on the movable element from the variable influencing the cavitation on the movable element. The total pressure determined is compared with a lower threshold value and a position, orie…	Q54 (Non-positive displacement fluid engines (i.e. driven by fluid); Miscellaneous motors and machines for producing mechanical power/thrust (F03B,D,G,H)); T01 (Digital Computers); X15 (Non-Fossil Fuel Power Generating Systems)	T01-S03; X15-C01	F03B-013/18; F03B-013/22; F03B-011/04; F03B-015/02; F03B-017/06; F03B-003/14	WO2014094979-A1 26 Jun 2014 F03B-013/18 201445 Pages: 30 German	WO2014094979-A1 WOEP003638 03 Dec 2013	DE10024592 17 Dec 2012	DIIDW:2014M18255
63	P	WO200257623-A1; US2003001392-A1; EP1364124-A1; AU2002245285-A1; US6765307-B2; CA2473689-C; EP1364124-A4	Wave energy converter for conserving energy from ocean surface waves comprises a tubular shell mounted about a piston which are responsive to wave in a body of water.	GERBER J	OCEAN POWER TECHNOLOGIES INC (OCAN-C)	2002538499	NOVELTY - A wave energy converter (WEC) includes a tubular structure and a piston (12) within the tubular structure where the relative motion between the piston (12) and the tubular structure is used to generate (42) electric power. The length (L) of the tubular structure may be selected to have a predetermined value based on several parameters.	Q55 (Positive displacement fluid machines/pumps/compressors (i.e. for driving fluid) (F04B,C)); X15 (Non-Fossil Fuel Power Generating Systems)	X15-C01	F03B-013/10; F03B-013/12; H02P-009/04; F03B-013/14; F03B-013/18; F03B-013/20; F03B-013/00	WO200257623-A1 25 Jul 2002 F03B-013/10 200257 Pages: 53 English	WO200257623-A1 WOUS01549 15 Jan 2002	US261941P 16 Jan 2001	DIIDW:2002538499
64	P	CN107269457-A; CN107269457-B	Ship oscillating and floating wave energy converting device, has top plate mounted on ship body and three-phase asynchronous generator provided with rotating shaft for rotating three-phase asynchronous generator to generate electricity.	CHEN S	UNIV JIANGSU SCI & TECHNOLOGY (UYJG-C)	201772557W	NOVELTY - The device has an energy capture system provided with a top plate, an elastic component and a floating plate. A top plate is mounted on a ship body. An end of an elastic element i.e. spring is fixed on the top plate. Another end of the elastic element is connected with a floating plate. An energy extraction system is provided with a three-phase asynchronous generator. A strip-shaped gea…	Q54 (Non-positive displacement fluid engines (i.e. driven by fluid); Miscellaneous motors and machines for producing mechanical power/thrust (F03B,D,G,H)); X15 (Non-Fossil Fuel Power Generating Systems)	Q54-X; X15-C01	F03B-013/16	CN107269457-A 20 Oct 2017 F03B-013/16 201776 Pages: 11 Chinese	CN107269457-A CN10645083 31 Jul 2017	CN10645083 31 Jul 2017	DIIDW:201772557W
65	P	US2022299004-A1; WO2022197353-A1; WO2022197353-A9; US11542911-B2	Wave energy converter apparatus for converting available wave energy to electricity, has supporting shaft oriented with axis perpendicular to direction of waves of liquid, and electrical rotary generator coupled to helical element and generating electricity responsive to rotation of element.	DOLENC T	DOLENC T (DOLE-Individual)	2022C1516Q	NOVELTY - The apparatus has a platform (5) configured to float below an upper liquid surface of liquid responsive to the apparatus being fixed in the liquid. The platform is provided with an upper platform surface that is fixed above a lower platform surface responsive to the wave energy converter apparatus fixed in the liquid. Support structures are mounted to the upper platform surface. A suppo…	Q54 (Non-positive displacement fluid engines (i.e. driven by fluid); Miscellaneous motors and machines for producing mechanical power/thrust (F03B,D,G,H)); X15 (Non-Fossil Fuel Power Generating Systems)	Q54-X; X15-C01A3	F03B-013/18; F03B-013/14; F03B-013/22; F03B-013/26	US2022299004-A1 22 Sep 2022 F03B-013/18 202282 English	US2022299004-A1 US249987 19 Mar 2021	US249987 19 Mar 2021	DIIDW:2022C1516Q
66	P	WO2014153618-A1; TW201447101-A; CA2908034-A1; AU2014245858-A1; SG11201507785-A1; EP2978965-A1; AR95945-A1; CN105247205-A; US2016053738-A1; KR2016021753-A; JP2016516156-W; EP2978965-A4; HK1220244-A0; BR112015024756-A2; US9726142-B2; ZA201507528-A; ID201605653-A; CN105247205-B; SG11201507785-B; AU2014245858-B2; TW620868-B1; HK1220244-A1; EP2978965-B1; JP6491190-B2; ES2711423-T3; MY183592-A	Wave energy conversion system for harnessing and converting wave energy in body of water into pressurized fluid, has unit which is deployed by moving tether into coupling engagement with fixture upon actuation of pump.	FIEVEZ J P	CETO IP PTY LTD (CETO-Non-standard)	2014S08739	NOVELTY - The wave energy conversion system (100) has a unit (110) providing a buoyant structure responsive to wave motion, a pump (132), and a tether (134) to be operably connected between the pump and a fixture below the unit. The unit is deployed by a moving a tether end into coupling engagement with the fixture upon actuation of the pump. Movement of the buoyant structure relative to the fixt…	Q42 (Hydraulic engineering, soil shifting and sewerage (E02, 3)); Q54 (Non-positive displacement fluid engines (i.e. driven by fluid); Miscellaneous motors and machines for producing mechanical power/thrust (F03B,D,G,H)); X15 (Non-Fossil Fuel Power Generating Systems)	X15-C01A1	E02B-009/08; F03B-013/18; F03B-013/14; F03B-013/22; B63B-021/22; B63B-021/56; B63B-043/06; B63H-025/42; E02B-000/00; F03B-000/00; F03B-013/20	WO2014153618-A1 02 Oct 2014 F03B-013/18 201466 Pages: 79 English	WO2014153618-A1 WOAU000340 28 Mar 2014	AU901163 28 Mar 2013	DIIDW:2014S08739
67	P	CN115095470-A; CN115095470-B	Index distribution-type large scale oscillating water column type wave energy conversion device, has air chamber structure whose bottom end is provided with water inlet, turbine located in air chamber structure, and power storage device connected with turbine.	WANG L	UNIV SOUTH CHINA TECHNOLOGY (UYSC-C)	2022C5232S	NOVELTY - The device has multiple device bodies that are fixed on a water bottom portion, where distance between the first and second device bodies is set as a0 along wave incidence direction, distance between adjacent two device bodies is in exponential relation with a0 and size parameters of the device bodies are same. Each device body comprises an air chamber structure, a turbine and a power s…	Q54 (Non-positive displacement fluid engines (i.e. driven by fluid); Miscellaneous motors and machines for producing mechanical power/thrust (F03B,D,G,H)); X15 (Non-Fossil Fuel Power Generating Systems)	Q54-X; X15-C01	F03B-013/14	CN115095470-A 23 Sep 2022 F03B-013/14 202282 Chinese	CN115095470-A CN10743390 28 Jun 2022	CN10743390 28 Jun 2022	DIIDW:2022C5232S
68	P	CN115419543-A	Micro-wave energy conversion device for directional frequency conversion in marine facility, has box cover connected with box body in sealing manner, and piezoelectric sheet set on vibrating portion for converting wave energy into electric energy, and outputting electric energy.	RAO W	UNIV QILU TECHNOLOGY (UYQQ-C)	2022F2603H	NOVELTY - The device has an outer waterproof system provided with a box cover, a box body (2) and a sealing sleeve (3). The box cover is connected with the box body in a sealing manner. A ratchet wheel-spring system and an energy conversion system are fixed in the box cover. A wave energy capturing system converts wave energy into electric energy and outputs electric energy. The energy conversion…	Q54 (Non-positive displacement fluid engines (i.e. driven by fluid); Miscellaneous motors and machines for producing mechanical power/thrust (F03B,D,G,H)); V06 (Electromechanical Transducers and Small Machines); X15 (Non-Fossil Fuel Power Generating Systems)	Q54-X; V06-M06D; V06-U04B; V06-V01E; X15-C01	F03B-011/00; F03B-013/16; H02N-002/18	CN115419543-A 02 Dec 2022 F03B-013/16 202202 Chinese	CN115419543-A CN11059366 31 Aug 2022	CN11059366 31 Aug 2022	DIIDW:2022F2603H
69	P	WO2013014682-A2; WO2013014682-A3; IN201102511-I4; AU2012288425-A1; CA2844023-A1; EP2734728-A2; US2014157767-A1; CN103814211-A; JP2014521017-W; ZA201401366-A; CN103814211-B; AU2012288425-B2; US9771921-B2; JP6306505-B2; CA2844023-C	Inlet system for free floating wave energy converter e.g. ocean wave energy converter has linear actuator mounted on suspension unit, and used to push inlet pipe fixedly attached to buoyancy tanks, in and out of water.	GHOUSE S M	GHOUSE S M (GHOU-Individual)	2013B64422	NOVELTY - The inlet system (800) has a pair of buoyancy tanks (502) supported and attached by suspension unit (801) to one side of an inlet pipe (803). The inlet pipe is coupled in fluid communication with a flexible pipe (204) extending between inlet end and outlet end. A linear actuator (804) is mounted on the suspension unit, and used to push the inlet pipe in and out of water. The inlet pipe …	Q54 (Non-positive displacement fluid engines (i.e. driven by fluid); Miscellaneous motors and machines for producing mechanical power/thrust (F03B,D,G,H)); X15 (Non-Fossil Fuel Power Generating Systems)	X15-C01	F03B-013/18; F03B-013/24; F03B-000/00; F03B-013/14	WO2013014682-A2 31 Jan 2013 F03B-013/18 201312 Pages: 32 English	WO2013014682-A2 WOIN000510 20 Jul 2012	INCH02511 22 Jul 2011	DIIDW:2013B64422
70	P	ZA201004376-A	Wave energy converter e.g. overtopping device has buoyant element that is moved in response to wave height by variation in chamber volume such that chamber is fixed with pump for draining water from reservoir.	ELLJAH R A	ELLJAH R A (ELLJ-Individual)	2011L84160	NOVELTY - The converter (1) has a buoyant element (4) which provides an inlet (6) through a passage to a reservoir (8) with a turbine (10). The reservoir is provided with an outlet (20) in flow communication with a stationary variable volume chamber (16) through a unidirectional valve. The variable volume chamber is provided with an outlet through a uni-directional valve. The buoyant element is m…	Q55 (Positive displacement fluid machines/pumps/compressors (i.e. for driving fluid) (F04B,C)); Q64 (Belts, chains, gearing (F16G,H)); X11 (Power Generation and High Power Machines); X15 (Non-Fossil Fuel Power Generating Systems)	X11-J05; X15-C01A1	F04B-000/00; F16H-000/00; H02K-000/00	ZA201004376-A 27 Jul 2011 F04B-000/00 201260 Pages: 16 English	ZA201004376-A ZA004376 18 Jun 2010	ZA001893 18 Mar 2009	DIIDW:2011L84160
71	P	CN102644537-A; CN102644537-B	Tidal current energy and wave energy converting coupled system has tide energy capture system which is provided to capture hydraulic energy stored in energy accumulator.	LIN Z	UNIV ZHEJIANG NINGBO TECHNOLOGY INST (NBLG-C)	2012P44389	NOVELTY - The system has flow energy capture system and wave energy capture system. The wave energy capture system is provided to capture the hydraulic energy in energy accumulator (8.1). A tide energy capture system is provided to capture the hydraulic energy stored in the energy accumulator (8.2). The energy accumulator (8.1) is provided with the hydraulic energy accumulator (8.2) that is coupl…	Q54 (Non-positive displacement fluid engines (i.e. driven by fluid); Miscellaneous motors and machines for producing mechanical power/thrust (F03B,D,G,H)); Q57 (Fluid-pressure actuators; hydraulic/pneumatics in general (F15)); X15 (Non-Fossil Fuel Power Generating Systems)	X15-C01; X15-C02	F03B-013/00; F03B-013/14; F15B-001/02	CN102644537-A 22 Aug 2012 F03B-013/00 201275 Pages: 7 Chinese	CN102644537-A CN10119819 10 May 2011	CN10119819 10 May 2011	DIIDW:2012P44389
72	P	WO2022260521-A1; NL2028428-B1; EP4352357-A1	Wave energy converter for converting wave energy into usable energy, has energy converting unit for converting movement of floating element into usable electrical energy, where connections allow floating element to move in vertical direction.	PAULIDES J J H	AEWH BV (AEWH-Non-standard)	2022F5243X	NOVELTY - The converter (1) has three connections (5) that are used for connecting a floating element (2) to a fixed or floating world (6). The first sides of the three connections engage at three separate locations on the floating element. The second sides of the three connections engage either directly or indirectly on the fixed or floating world. An energy converting unit (7) is used for conve…	Q54 (Non-positive displacement fluid engines (i.e. driven by fluid); Miscellaneous motors and machines for producing mechanical power/thrust (F03B,D,G,H)); X15 (Non-Fossil Fuel Power Generating Systems)	Q54-X; X15-C01	F03B-013/18	WO2022260521-A1 15 Dec 2022 F03B-013/18 202301 Pages: 33 English	WO2022260521-A1 WONL050322 09 Jun 2022	NL2028428 10 Jun 2021	DIIDW:2022F5243X
73	P	US2013069370-A1; US8810056-B2	Ocean wave energy converter for converting kinetic energy of ocean waves into electricity has drive rod freely movable between upstroke and downstroke positions to drive generator set within main body.	AMES P F	AMES P F (AMES-Individual)	2013E06281	NOVELTY - The ocean wave energy converter (10) has three generators set within the main body (12) to generate electricity. Three drive rods (22) each with buoy attached at one end are freely movable between upstroke and downstroke positions. The drive rods drive the generators by reciprocating between the upstroke and downstroke positions. The drive rods reciprocate between upstroke and downstrok…	Q54 (Non-positive displacement fluid engines (i.e. driven by fluid); Miscellaneous motors and machines for producing mechanical power/thrust (F03B,D,G,H)); X15 (Non-Fossil Fuel Power Generating Systems)	X15-C01	F03B-013/18; F03B-013/10	US2013069370-A1 21 Mar 2013 F03B-013/18 201322 Pages: 11 English	US2013069370-A1 US623616 20 Sep 2012	US536642P 20 Sep 2011	DIIDW:2013E06281
74	P	GB2475049-A; WO2011055111-A2; WO2011055111-A3; EP2496829-A2; US2012299303-A1; EP2496829-B1; US9297352-B2	Wave energy converter i.e. long attenuator type sea wave energy converter, for extracting energy from waves in sea, has floating flexible hose transferring energy from wave surface to spine, where strain energy is utilized to pump air.	BELLAMY N W	BELLAMY N W (BELL-Individual)	2011F00395	NOVELTY - The converter (10) has a floating flexible hose in surface contact with an incident wave surface (11) in a wave propagation direction (14). The flexible hose transfers wave energy from the incident wave surface to an internal elastic spine under bucking compression in a form of elastic strain energy. The elastic strain energy is utilized to drive a series of diaphragm inverting seals in…	Q54 (Non-positive displacement fluid engines (i.e. driven by fluid); Miscellaneous motors and machines for producing mechanical power/thrust (F03B,D,G,H)); X15 (Non-Fossil Fuel Power Generating Systems)	X15-C01	F03B-013/18; F03B-013/24; F03B-013/10	GB2475049-A 11 May 2011 F03B-013/18 201133 Pages: 15 English	GB2475049-A GB019233 03 Nov 2009	GB019233 03 Nov 2009	DIIDW:2011F00395
75	P	US2022224211-A1; EP4030051-A1; CN114763777-A; TW202227715-A; TW780570-B1; EP4030051-B1	Multi-axial wave energy conversion device for converting wave energy into electricity, has arm whose second end is capable of rotating or swinging relative to driving component around second axis parallel to first axis.	WENG C	FLH ENERGY TECHNOLOGY LTD (FLHE-Non-standard)	202292156J	NOVELTY - The conversion device (1) has a permanent magnet generating assembly (12) provided on its main body (11). The permanent magnet generating assembly includes a permanent magnet generator, an arm, and a driving component. The permanent magnet generator has a stator structure, and a rotor structure capable of rotating or swinging relative to the stator structure. The permanent magnet genera…	Q54 (Non-positive displacement fluid engines (i.e. driven by fluid); Miscellaneous motors and machines for producing mechanical power/thrust (F03B,D,G,H)); V06 (Electromechanical Transducers and Small Machines); X11 (Power Generation and High Power Machines); X15 (Non-Fossil Fuel Power Generating Systems)	Q54-X; V06-M10; X11-J05B; X11-G; X11-B; X15-C01	F03B-013/16; H02K-021/14; H02K-007/18; F03B-013/18; F03B-013/20; F03B-013/14; F03B-013/22; F03G-003/08	US2022224211-A1 14 Jul 2022 H02K-021/14 202259 English	US2022224211-A1 US496775 08 Oct 2021	TW101243 13 Jan 2021	DIIDW:202292156J
76	P	US2012091709-A1; US8836152-B2	Wave energy converter i.e. hydraulic wave energy converter, has generator connected to motor such that rotation of motor causes generator to produce energy, and pendulum adjuster connected to pendulum to change gravity of pendulum.	HOBDY M	HOBDY M (HOBD-Individual)	2012E54270	NOVELTY - The converter (10) has a pendulum (62) pivotally positioned in a shell (56), and a pump (31) operated by a movable pendulum so as to pump hydraulic fluid outwardly from the pump. A hydraulic motor (33) is interconnected to the pump such that the fluid from the pump causes rotation of the motor. An electrical generator (57) is connected to the motor such that the rotation of the motor ca…	Q54 (Non-positive displacement fluid engines (i.e. driven by fluid); Miscellaneous motors and machines for producing mechanical power/thrust (F03B,D,G,H)); X15 (Non-Fossil Fuel Power Generating Systems)	X15-C01	F03B-013/16; F03B-013/20; F03G-007/08; H02P-009/00	US2012091709-A1 19 Apr 2012 F03B-013/16 201228 Pages: 19 English	US2012091709-A1 US333450 21 Dec 2011	US271743 14 Nov 2008	DIIDW:2012E54270
77	P	GB2555845-A; WO2018087571-A2; WO2018087571-A3; EP3538756-A2; EP3538756-B1	Submerged heaving wave energy converter for converting wave energy into electrical, has drive unit urged towards position by biasing element, where back and forth movement of drive unit between positions causes drive mechanism to rotate.	ETHERINGTON S	AQUA POWER TECHNOLOGIES (AQUA-Non-standard)	2018379207	NOVELTY - The converter (3) has a submerged element comprising a biasing element acting on a drive unit and connected to a generator drive mechanism when a buoyant structure encounters a wave crest, where spacing between the buoyant structure, the submerged element and a distal end of the drive unit is increased. The drive unit is urged towards a first position by the biasing element, where back …	A88 (Mechanical engineering and tools e.g. valves, gears and conveyor belts.); Q54 (Non-positive displacement fluid engines (i.e. driven by fluid); Miscellaneous motors and machines for producing mechanical power/thrust (F03B,D,G,H)); X15 (Non-Fossil Fuel Power Generating Systems)	A12-H; Q54-X; X15-C01	F03B-013/18; F03B-013/20; F03B-000/00	GB2555845-A 16 May 2018 F03B-013/20 201835 Pages: 28 English	GB2555845-A GB019186 12 Nov 2016	GB019186 12 Nov 2016	DIIDW:2018379207
78	P	WO2016097464-A1; EP3280907-A1; EP3280907-A4; EP3772582-A1; EP3280907-B1; EP3901449-A4; EP3901449-A1	Wave energy conversion apparatus used in shallow water, has power-take-off assembly that is used for extracting energy from motion of fin.	JARVINEN A	AW-ENERGY OY (AWEN-Non-standard)	2016383078	NOVELTY - The apparatus has base (1). The fin (2) is pivotally connected to base. The fin has float unit (2b) that is buoyant in water tending to assist the fin to vertical. The power-take-off (PTO) assembly (5) is used for extracting energy from motion of fin. The conversion apparatus is formed and arranged so that when the base is anchored to the sea bed with the fin facing the wave motion, the…	Q42 (Hydraulic engineering, soil shifting and sewerage (E02, 3)); Q54 (Non-positive displacement fluid engines (i.e. driven by fluid); Miscellaneous motors and machines for producing mechanical power/thrust (F03B,D,G,H)); X15 (Non-Fossil Fuel Power Generating Systems)	Q42-A03; Q54-X; X15-C01	E02B-009/08; F03B-013/18	WO2016097464-A1 23 Jun 2016 F03B-013/18 201644 Pages: 31 English	WO2016097464-A1 WOFI051033 20 Dec 2014	EP174933 20 Dec 2014	DIIDW:2016383078
79	P	EP3343021-A1	Wave energy converter, has hull volume and comprising unit to vary that hull volume on command in response to wave conditions.	GIBSON C	QUOCEANT LTD (QUOC-Non-standard)	2018523248	NOVELTY - The wave energy converter has a hull volume and comprising unit to vary that hull volume on command in response to wave conditions. The inflatable section (104) is connected to an adjacent inflatable section by a web portion (107) including an elastic element which biases the inflatable section towards a stowed state. The inflatable sections are sandwiched between inner and outer layers…	Q54 (Non-positive displacement fluid engines (i.e. driven by fluid); Miscellaneous motors and machines for producing mechanical power/thrust (F03B,D,G,H)); X15 (Non-Fossil Fuel Power Generating Systems)	Q54-X; X15-C01	F03B-013/14; F03B-013/20	EP3343021-A1 04 Jul 2018 F03B-013/14 201846 Pages: 13 English	EP3343021-A1 EP207406 29 Dec 2016	EP207406 29 Dec 2016	DIIDW:2018523248
80	P	WO2014027295-A1	Wave energy converter for producing air under pressure from movement of water waves, has deflector walls which diverge from outside of sidewalls of channel-shaped chamber towards outer end of chamber to deflect waves.	SWART E C	SWART E C (SWAR-Individual)	2014D07949	NOVELTY - The wave energy converter (1) has deflector walls (14) diverging from outside of the sidewalls of a horizontal inverted channel-shaped chamber (2) towards the outer end (5) of the chamber. The deflector walls deflect the waves passing on outside the sidewalls towards communication apertures through the sidewall below the low tide water level and towards the position at which each deflec…	Q54 (Non-positive displacement fluid engines (i.e. driven by fluid); Miscellaneous motors and machines for producing mechanical power/thrust (F03B,D,G,H)); X15 (Non-Fossil Fuel Power Generating Systems)	X15-C01; X15-C02	F03B-013/14; F03B-013/24; F03B-013/26	WO2014027295-A1 20 Feb 2014 F03B-013/14 201415 Pages: 23 English	WO2014027295-A1 WOIB056574 12 Aug 2013	ZA006119 15 Aug 2012	DIIDW:2014D07949
81	P	CN210738729-U; CN111852732-A	Lateral supporting type piezoelectric type wave energy converting device for bridge pier, has fixing bracket and floating sleeve inner surface provided with multi-layer piezoelectric film that is connected with charging battery or warning device.	ZHANG H	UNIV ZHEJIANG OCEAN (UYZO-C)	202055216U	(CN210738729-U) NOVELTY - The utility model claims a lateral supporting piezoelectric type wave energy converting device for pier, comprising a floating body buoyancy sleeve out of the pier, sleeved outside the floating sleeve, the buoyancy sleeve set on the outer surface of the multi-layer piezoelectric film, convex buoyancy sleeve set on upper and lower pier radial, fixing bracket of the bump t…	Q54 (Non-positive displacement fluid engines (i.e. driven by fluid); Miscellaneous motors and machines for producing mechanical power/thrust (F03B,D,G,H)); V06 (Electromechanical Transducers and Small Machines); W05 (Alarms, Signalling, Telemetry and Telecontrol); X15 (Non-Fossil Fuel Power Generating Systems)	Q54-X; V06-M06D; V06-U04B; V06-V01B1; V06-V01E; W05-A03A; X15-C01	F03B-011/00; F03B-013/14; H02N-002/18	CN210738729-U 12 Jun 2020 F03B-013/14 202051 Pages: 6 Chinese	CN210738729-U CN21662427 30 Sep 2019	CN10945038 30 Sep 2019	DIIDW:202055216U
82	P	WO2010042358-A2; WO2010042358-A3; US2011068578-A1; AU2009302629-A1; EP2313648-A2; CA2734543-A1; US8049356-B2; CN102257266-A; JP2012505349-W; EP2313648-A4	Wave energy conversion device, has two different members, and damping unit(s) capable of damping relative motion under conditions of extreme waves, where damping unit(s) is cylindrical bellowed elastomeric member.	CHERVIN C	DU PONT DE NEMOURS & CO E I (DUPO-C)	2010E33982	NOVELTY - A wave energy conversion device (1) has a member (3) capable of moving in response to a wave, and another member (4) mechanically coupled to the former member and capable of relatively moving with respect to the former member under the influence of the wave, where the relative motion is converted into electrical energy. A damping unit(s) (7a, 7b) is capable of damping the relative motio…	A88 (Mechanical engineering and tools e.g. valves, gears and conveyor belts.); A23 (Polyamides; polyesters. (including polycarbonates, polyesteramides); alkyds; other unsaturated polymers.); A25 (Polyurethanes; polyethers.); Q54 (Non-positive displacement fluid engines (i.e. driven by fluid); Miscellaneous motors and machines for producing mechanical power/thrust (F03B,D,G,H)); X15 (Non-Fossil Fu…	A12-H09; A12-W16; X15-C01	F03B-013/14; F03B-013/20; F03B-013/22; F03B-017/06; F03B-015/18; F03B-013/10; F03B-013/12; H02P-009/04; F03B-013/16	WO2010042358-A2 15 Apr 2010 F03B-013/20 201029 Pages: 33 English	WO2010042358-A2 WOUS058930 30 Sep 2009	US195673P 09 Oct 2008	DIIDW:2010E33982
83	P	US2015233340-A1; IL235452-A	Seashore wave energy converting facility e.g. hydropower facility, has turbine that is located under of lower edge of descending ramp, and pillars to place facility at seashore line to enable installation of facility at seashore.	LEVI Y	LEVI Y (LEVI-Individual)	2015476234	NOVELTY - The facility (10) has ascending ramp (12) that is a sloped ramp which is installed at seashore line such that lowered end is immersed in sea while elevated end is located above sea level. Descending ramp (14) is a sloped ramp having an opposite slope with regard to ascending ramp. Descending ramp is connected continuously to elevated end of ascending ramp. Turbine (20) is located under …	Q42 (Hydraulic engineering, soil shifting and sewerage (E02, 3)); Q54 (Non-positive displacement fluid engines (i.e. driven by fluid); Miscellaneous motors and machines for producing mechanical power/thrust (F03B,D,G,H)); X15 (Non-Fossil Fuel Power Generating Systems)	Q42-A02C; X15-C01	E02B-003/00; F03B-013/14; F03B-013/22; E02B-001/00	US2015233340-A1 20 Aug 2015 F03B-013/14 201557 Pages: 13 English	US2015233340-A1 US507853 07 Oct 2014	US940434P 16 Feb 2014	DIIDW:2015476234
84	P	WO2010077158-A1; WO2010077158-A4	Wave energy converter for generating electricity from sea waves has mechanical springs and power take-off systems that work in phase and in parallel but not necessarily parallel.	ALBUQUERQUE J M B	ALBUQUERQUE J M B G (ALBU-Individual)	2010H90089	NOVELTY - The wave energy converter has three mechanical springs (5,6,7) individually connected on two legs (12,13,14) and each leg is connected by two springs such that the entire spring system assumes a triangular form. Each power take-off damper (8,9,10) is connected to two legs exactly like the spring connection. The spring and the power take-off systems work in phase and in parallel but not …	A88 (Mechanical engineering and tools e.g. valves, gears and conveyor belts.); Q54 (Non-positive displacement fluid engines (i.e. driven by fluid); Miscellaneous motors and machines for producing mechanical power/thrust (F03B,D,G,H)); X15 (Non-Fossil Fuel Power Generating Systems)	A12-E08B; A12-H; A12-W16; X15-C01C	F03B-013/18; F03B-013/20	WO2010077158-A1 08 Jul 2010 F03B-013/18 201046 Pages: 53 English	WO2010077158-A1 WOPT000058 29 Dec 2008	WOPT000058 29 Dec 2008	DIIDW:2010H90089
85	P	CN207377704-U	Oscillating buoy type wave energy converting device, has damping generator connected with cavity inner wall of oscillating buoy, and piston whose lower part is fixedly connected with pile foundation structure through air cylinder.	ZHANG C	UNIV DALIAN TECHNOLOGY (UYDA-C)	201840695N	NOVELTY - The utility model claims an oscillating water column and oscillating buoy type wave energy converting device, belonging to the technical field of new energy utilization. the device comprises oscillating water column system and oscillating buoy system. The utility model combines the advantages of the oscillating water column and oscillating buoy device, an oscillating water column wave e…	Q54 (Non-positive displacement fluid engines (i.e. driven by fluid); Miscellaneous motors and machines for producing mechanical power/thrust (F03B,D,G,H)); X15 (Non-Fossil Fuel Power Generating Systems)	Q54-X; X15-C01A1	F03B-013/18; F03B-013/24	CN207377704-U 18 May 2018 F03B-013/24 201837 Pages: 7 Chinese	CN207377704-U CN21481249 08 Nov 2017	CN21481249 08 Nov 2017	DIIDW:201840695N
86	P	US2019040839-A1; US10662918-B2	Wave energy conversion system, has actuated geometry component that is connected to body and actuated geometry component operable to modify size of opening or shape of opening.	THRESHER R	ALLIANCE SUSTAINABLE ENERGY LLC (ALLU-C)	201913809R	NOVELTY - The system (2) has a body (4) comprising a planar frame having a front surface (4A) and an opening extending through the body. The body is configured to connect to a power take off device (6). The transfer wave energy provided to the power take off device through movement of the body relative to the power take off device during operation. An actuated geometry component (8A) is connected…	Q54 (Non-positive displacement fluid engines (i.e. driven by fluid); Miscellaneous motors and machines for producing mechanical power/thrust (F03B,D,G,H)); X15 (Non-Fossil Fuel Power Generating Systems)	Q54-X; X15-C01	F03B-013/14; F03B-013/16; F03B-013/18; F03B-013/20	US2019040839-A1 07 Feb 2019 F03B-013/16 201912 Pages: 33 English	US2019040839-A1 US053327 02 Aug 2018	US142113P 02 Apr 2015	DIIDW:201913809R
87	P	DE102012011287-A1; WO2013182678-A2; DE102012011287-B4; WO2013182678-A3	Wave energy converter for use as mechanical system for using potential wave energy, has universal joint of hub parallelogram, which is articulately fastened on stand having lifting bodies.	GIMSA A	GIMSA A (GIMS-Individual)	2013W78247	NOVELTY - The wave energy converter has a universal joint of a hub parallelogram, which is articulately fastened on a stand having lifting bodies (21). A traction element is present in another joint of the hub parallelogram that lies below the universal joint. A hoisting rope (25) is fixed to the traction element, which is anchored to the sea floor or other fixing point in the sea and a generator…	Q54 (Non-positive displacement fluid engines (i.e. driven by fluid); Miscellaneous motors and machines for producing mechanical power/thrust (F03B,D,G,H)); X15 (Non-Fossil Fuel Power Generating Systems)	X15-C01	F03B-013/18; F03D-000/00	DE102012011287-A1 12 Dec 2013 F03B-013/18 201401 Pages: 11 German	DE102012011287-A1 DE10011287 08 Jun 2012	DE10011287 08 Jun 2012	DIIDW:2013W78247
88	P	AU2023219862-B1	Sphere shaped wave energy system for generating wave energy from extreme waves, has floating platform for floating on surface of body of water using set of floats secured to platform, and wave energy converters attached to floating platform.	LAM T T	LAM T T (LAMT-Individual)	2024020122	NOVELTY - The system has a floating platform (17) for floating on a surface of a body of water using a set of floats (4) secured to the platform. A set of circular motion-based wave energy converters (7a,7b,8a,8b) is attached to the floating platform. The wave energy converter is provided with a pivot arm. The float is attached to an end of the pivot arm, where the floating platform and the wave …	Q54 (Non-positive displacement fluid engines (i.e. driven by fluid); Miscellaneous motors and machines for producing mechanical power/thrust (F03B,D,G,H)); X15 (Non-Fossil Fuel Power Generating Systems)	Q54-X; X15-C01A1	F03B-013/20	AU2023219862-B1 04 Jan 2024 F03B-013/20 202403 English	AU2023219862-B1 AU219862 23 Aug 2023	AU900669 13 Mar 2023	DIIDW:2024020122
89	P	WO2015130181-A1; CA2939335-A1; AU2014384765-A1; CN105980698-A; IN201627030576-A; JP2017507274-W; US2017074231-A1; EP3149324-A1; BR112016019204-A2; JP6388140-B2; AU2014384765-B2; NZ724132-A; US10221829-B2; CN105980698-B; EP3149324-B1	Wave energy conversion arrangement for absorbing and converting energy of intermutual movements of floats, has modules whose elementary energy conversion arrangements are energetically coupled with each other.	STAMIRSKI M	STAMIRSKI M (STAM-Individual)	2015516337	NOVELTY - The arrangement (13) has elementary energy conversion arrangements using reciprocating movement of first float (P1) of first module (M1) relative to second float (P2) of second module (M2). Connecting units (16) are alternatively connected with each other. The first float is joined with the second float. The elementary energy conversion arrangements of the adjoining module are energetic…	Q54 (Non-positive displacement fluid engines (i.e. driven by fluid); Miscellaneous motors and machines for producing mechanical power/thrust (F03B,D,G,H)); X15 (Non-Fossil Fuel Power Generating Systems)	X15-C01	F03B-013/14; F03B-013/20; F03B-013/16; F03B-013/12; F16H-019/04; F16H-031/00	WO2015130181-A1 03 Sep 2015 F03B-013/14 201561 Pages: 28 English	WO2015130181-A1 WOPL000016 27 Feb 2014	AU384765 27 Feb 2014	DIIDW:2015516337
90	P	WO2022167792-A1; AU2022216873-A1; KR2023137922-A; US2023374965-A1; EP4288657-A1; CN117178114-A; BR112023015256-A2; JP2024505925-W	Rotating absorber for use in wave energy converter device, has cylindrical or spherical shape, where rotation of absorber about axis aligns absorber to desired orientation relative to water flow.	FOSTER G	MARINE POWER SYSTEMS LTD (MARI-Non-standard)	2022A0908Y	NOVELTY - The wave energy absorber (112) has a body portions (114) that is arranged to engage hydrodynamically with a water flow from waves of a body of water. The body portions comprising a rotational axis about which the body portion is arranged to rotate. The body portion is asymmetrical about said rotational axis. A linkage is arranged to couple the body portions to a wave energy converter (W…	Q54 (Non-positive displacement fluid engines (i.e. driven by fluid); Miscellaneous motors and machines for producing mechanical power/thrust (F03B,D,G,H)); X15 (Non-Fossil Fuel Power Generating Systems)	Q54-X; X15-C01	F03B-013/18; F03B-013/16	WO2022167792-A1 11 Aug 2022 F03B-013/18 202266 Pages: 33 English	WO2022167792-A1 WOGB050273 02 Feb 2022	GB001430 02 Feb 2021	DIIDW:2022A0908Y
91	P	RU120722-U1	Wave power plant has water turbine which is provided with generator, and wave energy converters which are installed on bottom of pipelines and converters are installed on bottom of pipelines.	CHADIN I F	KOMI BIOLOGY INST (KOMI-Soviet Institute)	2013B79352	NOVELTY - The wave power plant has water turbine which is provided with a generator. The wave energy converters are installed on the bottom of the pipelines. The wave energy converter is in the form of water pumps, and has a long cylinder with a rod and the piston at the top of the cylinder is made as the intake and exhaust valves. The piston rod is attached to float with adjustable height settin…	Q54 (Non-positive displacement fluid engines (i.e. driven by fluid); Miscellaneous motors and machines for producing mechanical power/thrust (F03B,D,G,H)); X15 (Non-Fossil Fuel Power Generating Systems)	X15-C01	F03B-013/18	RU120722-U1 27 Sep 2012 201312 Pages: 1 Russian	RU120722-U1 RU149588 03 Dec 2010	RU149588 03 Dec 2010	DIIDW:2013B79352
92	P	WO2017025544-A1; EP3334925-A1; US2018238295-A1; US10408187-B2; EP3334925-B1	Wave energy converter for a floating vessel, comprises a support frame supporting a blade at a fixed angular orientation corresponding to the frame, and a pivot joint pivotally mounting the support frame to the structure around a pivot axis.	DUFFY P J	JOSPA LTD (JOSP-Non-standard)	201712389H	NOVELTY - The wave energy converter (10) comprises a support frame (3) supporting a blade (1,2) at a fixed angular orientation corresponding to the frame, a structure (4), a pivot joint (5) pivotally mounting the support frame to the structure around a pivot axis, and a power take off mechanism for transferring reciprocating rotary motion of the frame corresponding to the structure to an output p…	Q54 (Non-positive displacement fluid engines (i.e. driven by fluid); Miscellaneous motors and machines for producing mechanical power/thrust (F03B,D,G,H)); X15 (Non-Fossil Fuel Power Generating Systems)	Q54-X; X15-C01	F03B-013/18; F03B-013/22; F03B-013/20	WO2017025544-A1 16 Feb 2017 F03B-013/18 201716 Pages: 40 English	WO2017025544-A1 WOEP068990 09 Aug 2016	EP180722 12 Aug 2015	DIIDW:201712389H
93	P	WO2023026141-A1	Mooring device for wave energy converter system or floating system, has coupling elements for allowing rotation of conversion apparatus, and anchoring unit fixed to three-dimensional structure for connection of mooring lines.	GAROFALO L	ENI SPA (ENIE-C)	202323742R	NOVELTY - The device (100) has a three-dimensional beam structure (120) which houses a wave energy conversion apparatus (110) and which comprises two elements for rotational coupling to the energy conversion apparatus which are spaced apart from each other for defining a rotation axis (A) for the energy conversion apparatus. The rotational coupling elements allow for the rotation of the energy co…	A85 (Electrical applications.); Q24 (Ships; waterborne vessels; related equipment (B63)); Q54 (Non-positive displacement fluid engines (i.e. driven by fluid); Miscellaneous motors and machines for producing mechanical power/thrust (F03B,D,G,H)); X15 (Non-Fossil Fuel Power Generating Systems)	A12-H; A12-T04D; Q24-C02; Q54-X; X15-C01A3	B63B-021/50; F03B-013/20; F03G-007/08	WO2023026141-A1 02 Mar 2023 F03B-013/20 202329 Pages: 14 English	WO2023026141-A1 WOIB057700 17 Aug 2022	IT00022421 27 Aug 2021	DIIDW:202323742R
94	P	CN203476597-U; WO2015014241-A1; US2016138557-A1; US9702335-B2	High pressure water energy and hydraulic wave energy converter, has water inlet tube connected to drain valve room, and hanging rod connected with hook that is connected with bottom anchor pile, where valve room is provided with drain valve.	CHEN J	CHEN J (CHEN-Individual)	2014H53465	NOVELTY - A one for the wave of energy convert is high pressure water energy of hydraulic wave energy converter, comprising a floating on the water surface of the upper floating body of rectangle (1), of the cylindrical shell of the lower floating body (2) and first cable (3), the second cable (4) hanging rod (5), a ball hinge hook (6). anchor pile (7) and mooring facility. Upper floating body (1…	Q54 (Non-positive displacement fluid engines (i.e. driven by fluid); Miscellaneous motors and machines for producing mechanical power/thrust (F03B,D,G,H)); X15 (Non-Fossil Fuel Power Generating Systems)	X15-C01	F03B-013/14; F03B-013/18	CN203476597-U 12 Mar 2014 F03B-013/14 201429 Pages: 12 Chinese	CN203476597-U CN20453884 29 Jul 2013	CN20453884 29 Jul 2013	DIIDW:2014H53465
95	P	WO2013079585-A1; EP2786012-A1; EP2786012-B1	Wave energy converter for capturing energy from waves, includes fins to enhance tilting motion of fore end of each floating body upward with wave crest and aft end of floating body with wave trough.	DUFFY P J	JOSPA LTD (JOSP-Non-standard)	2013K29851	NOVELTY - A wave energy converter (100) comprises floating bodies (101), each having a buoyancy to pitch up and down with wave movement. Couplers (102) link the floating bodies to a prime mover. A tilt mechanism includes fins (103) mounted at different fore-aft positions on each floating body. Each fin extends downwardly towards the aft end of the floating body from the fore end of the body. The …	Q54 (Non-positive displacement fluid engines (i.e. driven by fluid); Miscellaneous motors and machines for producing mechanical power/thrust (F03B,D,G,H)); X15 (Non-Fossil Fuel Power Generating Systems)	X15-C01	F03B-013/20; F03B-013/22	WO2013079585-A1 06 Jun 2013 F03B-013/20 201340 Pages: 24 English	WO2013079585-A1 WOEP073943 29 Nov 2012	IE000529 30 Nov 2011	DIIDW:2013K29851
96	P	CN203717226-U	Moving ship wave power generating device has main shaft whose two sides are connected with power box that outputs mechanical energy for driving electric generator so as to generate electricity.	ZHENG Z	XIAMEN ZHONGTAI WIND ENERGY CO LTD (XIAM-Non-standard)	2014S43450	NOVELTY - This new type utility claims one a moving ship wave generating device, a wave energy conversion device by moving the upper hull and, wherein the wave energy conversion device are symmetrically set on the two side, wave energy conversion device of each one side include one multi-main shaft and a floating body, the floating body effect of low wave up and down, the wave energy through trip…	Q54 (Non-positive displacement fluid engines (i.e. driven by fluid); Miscellaneous motors and machines for producing mechanical power/thrust (F03B,D,G,H)); X15 (Non-Fossil Fuel Power Generating Systems)	X15-C01	F03B-013/14	CN203717226-U 16 Jul 2014 F03B-013/14 201467 Pages: 8 Chinese	CN203717226-U CN20088809 28 Feb 2014	CN20088809 28 Feb 2014	DIIDW:2014S43450
97	P	CN108953046-A; CN108953046-B	Three-dimensional wave energy generating device, has low pressure oil pipe fixed with oil outlet, hydraulic motor connected with electric generator, and accumulator and high pressure oil pipe are connected with each other.	JIN Z	UNIV YANSHAN (UYAN-C)	2018A04085	NOVELTY - The device has an ocean platform whose bottom part is fixed with a sea bed that is connected with a platform part, a mounting ocean wave energy converting device and a generator. The ocean wave energy converting device and the generator are mounted on the ocean platform. The ocean wave energy converting device is provided with a moving connecting branch and a hook hinge. An oil inlet ho…	Q54 (Non-positive displacement fluid engines (i.e. driven by fluid); Miscellaneous motors and machines for producing mechanical power/thrust (F03B,D,G,H)); X15 (Non-Fossil Fuel Power Generating Systems)	Q54-X; X15-C01	F03B-013/18	CN108953046-A 07 Dec 2018 F03B-013/18 201905 Pages: 12 Chinese	CN108953046-A CN10557739 01 Jun 2018	CN10557739 01 Jun 2018	DIIDW:2018A04085
98	P	GB2547443-A; US2017241398-A1; AU2017201147-A1	Power take-off arrangement for wave energy converter, has units which applies torque that can be varied in operation to alter relative rotational velocities and accelerations of second and third shafts.	SHIELD D	ROMAX TECHNOLOGY LTD (ROMA-Non-standard)	201757400P	NOVELTY - The power take-off arrangement has a gearbox comprising a first shaft (20) connected to the wave energy converter and adapted to receive, in use, rotational motion from the wave energy converter. A second shaft is connected to a generator. A third shaft (38) is connected to units of applying torque. The torque applied by units can be varied in operation so as to alter the relative rotat…	Q54 (Non-positive displacement fluid engines (i.e. driven by fluid); Miscellaneous motors and machines for producing mechanical power/thrust (F03B,D,G,H)); Q64 (Belts, chains, gearing (F16G,H)); X15 (Non-Fossil Fuel Power Generating Systems)	Q54-X; Q64-C01; X15-C01C	F03B-013/18; F16H-003/72; F03B-013/20; F16H-019/08; F03B-013/14	GB2547443-A 23 Aug 2017 F03B-013/18 201758 Pages: 24 English	GB2547443-A GB002827 18 Feb 2016	GB002827 18 Feb 2016	DIIDW:201757400P
99	P	WO2022093013-A1; NL2026767-B1; CA3196225-A1; AU2021370162-A1; EP4232704-A1; US2024018933-A1	Wave energy converter for generating electrical power from wave energy, has shaft that is completely arranged inside float and air chamber shields shaft and generator off from water structure.	SWANENBERG S	DUTCH WAVE POWER BV (DUWA-Non-standard)	2022587586	NOVELTY - The wave energy converter has an elongate spacer (3) that is configured to connect the float (2) to an anchoring at, on or to a floor of a water structure. The float is configured to rotate as it moves along the elongate spacer due to waves and/or tidal movement of the water structure. A shaft is rotatably suspended inside the float and having a holder (9) to arrest the shaft against ro…	Q54 (Non-positive displacement fluid engines (i.e. driven by fluid); Miscellaneous motors and machines for producing mechanical power/thrust (F03B,D,G,H)); X15 (Non-Fossil Fuel Power Generating Systems)	Q54-X; X15-C01	F03B-013/18	WO2022093013-A1 05 May 2022 202244 Pages: 27 English	WO2022093013-A1 WONL050632 19 Oct 2021	NL2026767 26 Oct 2020	DIIDW:2022587586
100	P	GB2540615-A	Floating self-reacting wave energy converter i.e. marine wave energy converter, for extracting useful energy, has pair of surface floats that are approximately similar, and heave plate is rapidly returned to initial condition of arrangement.	SARGENT H C	SARGENT H C (SARG-Individual)	201707192D	NOVELTY - The converter has a pair of surface floats (8) that are approximately similar and axisymmetric and cylindrical about a longitudinal internal axis of the float, and with hemispherical ends such that high volume to surface ratio and short levers of the floats permits a generation of a high hydrostatic force. A heave plate (24) is rapidly returned to an initial condition of an arrangement …	Q54 (Non-positive displacement fluid engines (i.e. driven by fluid); Miscellaneous motors and machines for producing mechanical power/thrust (F03B,D,G,H)); X15 (Non-Fossil Fuel Power Generating Systems)	Q54-X; X15-C01	F03B-013/18	GB2540615-A 25 Jan 2017 F03B-013/18 201709 Pages: 39 English	GB2540615-A GB013059 24 Jul 2015	GB013059 24 Jul 2015	DIIDW:201707192D
101	P	US2013043682-A1; US8508063-B2	Wave energy converter for power generation, has two floats, rotational about respective central longitudinal axes, coupled individually with power take-offs via respective drive shafts oriented along longitudinal axes.	RHINEFRANK K E	COLUMBIA POWER TECHNOLOGIES INC (COLU-Non-standard)	2013C55078	NOVELTY - The wave energy converter (10) has two floats (11,12) and a spar (13) mated with a motor housing. Each float is rotational about a central longitudinal axis, and is coupled with each power take-off via drive shaft oriented along the central longitudinal axis. The power take-offs, preferably low-speed, high-torque direct driven rotary generators, are mounted within the motor housing. The…	Q54 (Non-positive displacement fluid engines (i.e. driven by fluid); Miscellaneous motors and machines for producing mechanical power/thrust (F03B,D,G,H)); X11 (Power Generation and High Power Machines); X15 (Non-Fossil Fuel Power Generating Systems)	X11-B; X15-C01	F03B-013/12; F03B-013/10; H02P-009/04	US2013043682-A1 21 Feb 2013 F03B-013/12 201316 Pages: 17 English	US2013043682-A1 US657145 22 Oct 2012	US202351P 20 Feb 2009	DIIDW:2013C55078
102	P	US2022018325-A1	Dynamic and adaptive mooring system for wave energy converters (WEC), has feedback loop between sensors and processing station to adjust and finetune optimum placements for WEC to optimize energy transfer from ocean waves to WECs.	PISHON N N	PISHON N N (PISH-Individual)	202214513P	NOVELTY - The dynamic and adaptive mooring system (100) comprises a moor configuration anchored to a seafloor (120). A set of fixed WECs is held by the set of movable mooring lines. The sensors are provided to collect data related to wave characteristics of incident waves approaching the set. A moving mechanism is provided to move the movable WEC. A processing station has an optimization algorith…	Q54 (Non-positive displacement fluid engines (i.e. driven by fluid); Miscellaneous motors and machines for producing mechanical power/thrust (F03B,D,G,H)); X15 (Non-Fossil Fuel Power Generating Systems)	Q54-X; X15-C01	F03B-013/18	US2022018325-A1 20 Jan 2022 F03B-013/18 202208 English	US2022018325-A1 US931583 17 Jul 2020	US931583 17 Jul 2020	DIIDW:202214513P
103	P	CN107104616-A; CN107104616-B	Method for controlling hierarchical robustness of direct drive type wave power generation system, involves calculating difference between reference current and output current of wave energy conversion device.	LIN Q	UNIV GUANGDONG TECHNOLOGY (UGTE-C)	201760703A	NOVELTY - The method involves realizing (S1) the frequency and displacement of the wave in real time by a wave energy capturing device. The reference current of a wave energy conversion device is determined (S2). The difference between the reference current and output current of the wave energy conversion device is calculated (S3) to perform sliding mode control on the wave energy conversion devi…	Q54 (Non-positive displacement fluid engines (i.e. driven by fluid); Miscellaneous motors and machines for producing mechanical power/thrust (F03B,D,G,H)); T01 (Digital Computers); X11 (Power Generation and High Power Machines); X13 (Switchgear, Protection, Electric Drives); X15 (Non-Fossil Fuel Power Generating Systems)	Q54-X; T01-J04A; X11-B; X13-H01D1C; X15-C01; X15-C03	F03B-013/16; H02P-101/10; H02P-021/00; H02P-021/22; H02P-025/032; H02P-027/12	CN107104616-A 29 Aug 2017 H02P-021/00 201772 Pages: 14 Chinese	CN107104616-A CN10555953 10 Jul 2017	CN10555953 10 Jul 2017	DIIDW:201760703A
104	P	WO2024069550-A1	Wave energy converter for converting wave energy from waves traveling in body of water to electrical energy or pressure energy e.g. hydraulic pressure, has power-take-off (PTO) mechanism that is able to apply variable resistance to oscillatory rotation between active and reactive element.	SHOTBOLT D	AZURA WAVE POWER NZ LTD (AZUR-Non-standard)	202435516B	NOVELTY - The converter (1) has a variable resistance power-take-off (PTO) mechanism (4) that is operational between the reactive element (B) and the active element (2) to convert angular momentum of the active element during its oscillatory rotation into electrical energy or pressure energy. The PTO mechanism is able to apply a variable resistance to the oscillatory rotation between the active e…	Q54 (Non-positive displacement fluid engines (i.e. driven by fluid); Miscellaneous motors and machines for producing mechanical power/thrust (F03B,D,G,H)); X15 (Non-Fossil Fuel Power Generating Systems)	Q54-X; X15-C01	F03B-013/18; F03B-013/20	WO2024069550-A1 04 Apr 2024 F03B-013/18 202431 Pages: 63 English	WO2024069550-A1 WOIB059739 29 Sep 2023	AU902833 30 Sep 2022	DIIDW:202435516B
105	P	RU2549006-C2; RU2013133471-A	Sea wave energy conversion unit, has pressurised water collector which is positioned in centre of torus and is attached to torus by bracing wires.	ZOTOV A N	HYDRODYNAMICS SCI & PRODN ASSOC STOCK CO (HYDR-Non-standard)	201525635J	NOVELTY - Invention refers to devices converting sea wave energy to potential water energy and finally to electric energy, and can be used as a main or additional electric power source for offshore facilities or onshore consumers. Device for sea wave energy conversion to electric power includes sea wave energy converter with an arm mounted on a joint, pump linked to the arm and connected to colle…	Q54 (Non-positive displacement fluid engines (i.e. driven by fluid); Miscellaneous motors and machines for producing mechanical power/thrust (F03B,D,G,H)); X11 (Power Generation and High Power Machines); X15 (Non-Fossil Fuel Power Generating Systems)	X11-B; X15-C01B1; X15-C01B2	F03B-013/22	RU2549006-C2 20 Apr 2015 F03B-013/22 201535 Russian	RU2549006-C2 RU133471 19 Jul 2013	RU133471 19 Jul 2013	DIIDW:201525635J
106	P	CN113565671-A; US11536242-B1; US2023015439-A1	Adjustable multifunctional bottom hinge swinging wave energy utilization device, has hydraulic oil cylinder located on back surface of wave energy plate, and wave monitor set on mounting bottom plate for monitoring wave direction angle.	CUI J	UNIV JIANGSU SCI & TECHNOLOGY (UYJG-C)	2021C5342J	NOVELTY - The device has three wave energy conversion devices that are arranged in a parallel manner. Each wave energy conversion device comprises a wave energy conversion component for converting wave kinetic energy into electric energy, a direction adjusting component for adjusting wave energy conversion component wave facing direction and a height adjusting component for adjusting height of th…	Q54 (Non-positive displacement fluid engines (i.e. driven by fluid); Miscellaneous motors and machines for producing mechanical power/thrust (F03B,D,G,H)); X15 (Non-Fossil Fuel Power Generating Systems)	Q54-X; X15-C03; X15-C01	F03B-011/00; F03B-011/02; F03B-013/18; F03B-013/20	CN113565671-A 29 Oct 2021 F03B-013/18 202196 Chinese	CN113565671-A CN10805146 16 Jul 2021	CN10805146 16 Jul 2021	DIIDW:2021C5342J
107	P	WO2010061199-A2; WO2010061199-A3; CA2744457-A1; EP2356334-A2; MX2011005510-A1; AU2009321364-A1; US2011258997-A1; CN102227555-A; ZA201103720-A; IN201102144-P2	Wave energy converter for conversion of sea wave energy to electricity has permanent magnets or electrical coils of armature which are sufficiently sized in terms of deadweight to ensure that float descends to trough of passing wave.	KELLY H G	TRIDENT ENERGY LTD (TRID-Non-standard)	2010G04645	NOVELTY - The wave energy converter (10) has combined weight float (23), linkage, and the armatures (16,17) which are arranged to cause the armature to fall. The electricity is generated upon upstroke and downstroke. The stack of permanent magnets or electrical coils of armature are sufficiently sized in terms of deadweight, to procure combined weight of armature, linkage, and float and other tra…	Q54 (Non-positive displacement fluid engines (i.e. driven by fluid); Miscellaneous motors and machines for producing mechanical power/thrust (F03B,D,G,H)); X15 (Non-Fossil Fuel Power Generating Systems)	X15-C01	F03B-013/18; F03B-000/00	WO2010061199-A2 03 Jun 2010 F03B-013/18 201038 Pages: 27 English	WO2010061199-A2 WOGB002776 27 Nov 2009	GB021835 28 Nov 2008	DIIDW:2010G04645
108	P	CN108533445-A; CN207879507-U; CN108533445-B	Dual-floater resonance-type far-sea wave generating device, has box body whose lower part is provided with lower floater, where box body is provided with wave energy converter that is connected with upper floater and lower floater.	YIN X	UNIV FOSHAN (UYFS-C)	2018747704	NOVELTY - The device has a box body (1) whose upper end is provided with an upper floater (2). A lower part of the box body is provided with a lower floater (3). The box body is provided with a wave energy converter that is connected with the upper floater and the lower floater. The wave energy converter comprises an upper screw, a lower screw rod and a generator. The upper screw rod is rotatably…	Q54 (Non-positive displacement fluid engines (i.e. driven by fluid); Miscellaneous motors and machines for producing mechanical power/thrust (F03B,D,G,H)); X15 (Non-Fossil Fuel Power Generating Systems)	Q54-X; X15-C01	F03B-013/20	CN108533445-A 14 Sep 2018 F03B-013/20 201865 Pages: 9 Chinese	CN108533445-A CN10112447 05 Feb 2018	CN10112447 05 Feb 2018	DIIDW:2018747704
109	P	WO2016009447-A1; IN201403458-I4; CA2954955-A1; US2017159636-A1; EP3194761-A1; CN107076104-A; JP2017524869-W; EP3194761-B1; ES2719731-T3; CN107076104-B; US10428787-B2; JP6618998-B2	Free floating wave energy converter for extracting wave energy, has flexible pipe is raised and lowered relative to surface of portion of water by respectively inflating and deflating inflatable and deflatable tubes with gas.	SYED M G	SYED M G (SYED-Individual)	201605123A	NOVELTY - The free floating wave energy converter has a supports attached to the one flexible pipe (204) at spaced apart locations. Each of the supports extends traverse to a longitudinal axis of the one flexible pipe and outwardly in opposite directions from the flexible pipe. The inflatable tubes (1300) attached to the supports on opposite sides of the one flexible pipe. The flexible pipe is ra…	Q54 (Non-positive displacement fluid engines (i.e. driven by fluid); Miscellaneous motors and machines for producing mechanical power/thrust (F03B,D,G,H)); X15 (Non-Fossil Fuel Power Generating Systems)	Q54-X; X15-C01	F03B-013/18; F03B-013/22; F03B-013/24; F28D-000/00; F03B-013/14; F03B-013/20	WO2016009447-A1 21 Jan 2016 F03B-013/18 201609 English	WO2016009447-A1 WOIN000282 13 Jul 2015	INCH03458 14 Jul 2014	DIIDW:201605123A
110	P	CN202645833-U	Centre float-type wave energy generating device, has connecting body connected with wave energy converting device through connecting rod, transmission shaft whose lower end is connected with impeller, and sleeve provided with water inlet.	FU S	UNIV SHANGHAI OCEAN (USHO-C)	2013F27892	NOVELTY - The device has a connecting body connected with a wave energy converting device through a connecting rod. The wave energy converting device is provided with a hollow floating cylinder body, a sleeve, a transmission shaft, a speed increaser, an impeller and a motor. The transmission shaft is connected with a generator through a speed increaser. A lower end of the transmission shaft is co…	Q54 (Non-positive displacement fluid engines (i.e. driven by fluid); Miscellaneous motors and machines for producing mechanical power/thrust (F03B,D,G,H)); X15 (Non-Fossil Fuel Power Generating Systems)	X15-C01	F03B-013/16	CN202645833-U 02 Jan 2013 F03B-013/16 201330 Chinese	CN202645833-U CN20303084 26 Jun 2012	CN20303084 26 Jun 2012	DIIDW:2013F27892
111	P	WO2022172167-A1; HK30056671-A2; GB2612282-A; CN116615604-A; AU2022219631-A1; HK40084675-A0; GB2612282-B; US2024011457-A1; GB2621275-A; AU2022219631-B2	Power extracting apparatus i.e. wave energy converter, for use in e.g. ocean, has drive shaft rotating about axis of rotation upon rotation of rotatable shafts and activation of gear system to drive electric generator.	BORIGAS E L	BUOGRA LTD (BUOG-Non-standard)	2022A6412K	NOVELTY - The apparatus has a element is pivotally connectable to an adjacent element about an axis of rotation for relative movement between the elements when the apparatus is subjected to kinetic energy of a water wave. The two pairs of coaxial bevel gears are arranged to rotate about the axis. A set of two rotatable shafts is arranged to extend in a direction substantially perpendicularly to t…	Q54 (Non-positive displacement fluid engines (i.e. driven by fluid); Miscellaneous motors and machines for producing mechanical power/thrust (F03B,D,G,H)); X15 (Non-Fossil Fuel Power Generating Systems)	Q54-X; X15-C01	F03B-013/14; F03B-013/16; F03B-013/18; F03B-013/20	WO2022172167-A1 18 Aug 2022 F03B-013/14 202269 Pages: 45 English	WO2022172167-A1 WOIB051153 09 Feb 2022	HK3025691 10 Feb 2021	DIIDW:2022A6412K
112	P	CN111075631-A; CN211924369-U	Elastic film-box type wave energy converting device, has box bodies connected together through pipeline, and power generation equipment arranged on pipeline, where size and weight of box bodies are same.	LI B	UNIV JIANGSU SCI & TECHNOLOGY (UYJG-C)	2020379634	NOVELTY - The elastic film-box type wave energy converting device has two elastic films respectively covered on wave-facing surface and wave-backing surface of box bodies. The box bodies are connected together through a pipeline, where size and weight of the box bodies are same. A power generation equipment is arranged on the pipeline. Side wall surface of the box bodies are respectively formed w…	Q54 (Non-positive displacement fluid engines (i.e. driven by fluid); Miscellaneous motors and machines for producing mechanical power/thrust (F03B,D,G,H)); X11 (Power Generation and High Power Machines); X15 (Non-Fossil Fuel Power Generating Systems)	Q54-X; X11-B; X15-C01	F03B-013/14	CN111075631-A 28 Apr 2020 F03B-013/14 202040 Pages: 8 Chinese	CN111075631-A CN10122442 27 Feb 2020	CN10122442 27 Feb 2020	DIIDW:2020379634
113	P	CN204283719-U	Sea wave energy conversion device, has telescopic cylinder whose end is connected with support phase and another end connected with rocker phase, and another telescopic cylinder whose end is connected with bracket phase.	WEI J	ZHEJIANG INT MARITIME COLLEGE (ZJIM-C)	201536704G	NOVELTY - The utility model is relates to one of sea wave energy conversion using device. Mainly solving the wave energy conversion device not using active and can absorb transmission of wave energy, conversion efficiency low, and can not automatically suitable for damp-proof position and falling the technology problem. Comprising a buoy, support frame, 2 telescopic group, rocker and support, fix…	Q54 (Non-positive displacement fluid engines (i.e. driven by fluid); Miscellaneous motors and machines for producing mechanical power/thrust (F03B,D,G,H)); X15 (Non-Fossil Fuel Power Generating Systems)	X15-C01	F03B-013/14	CN204283719-U 22 Apr 2015 F03B-013/14 201543 Pages: 8 Chinese	CN204283719-U CN20743332 03 Dec 2014	CN20743332 03 Dec 2014	DIIDW:201536704G
114	P	CN202690315-U	Wave energy converting device, has flow-guiding device for collecting wave energy to form larger kinetic energy to push impeller device to rotate and store output mechanical energy into energy conversion output unit.	PENG Z	PENG Z (PENG-Individual)	2013G31021	NOVELTY - The device has a floating device main body floating on a water surface wave energy converting device. A guide device main body is utilized for collecting wave flow and return impact energy to form larger kinetic energy. A flow-guiding device is utilized for collecting wave energy to form the larger kinetic energy to push an impeller device to rotate and store output mechanical energy in…	Q54 (Non-positive displacement fluid engines (i.e. driven by fluid); Miscellaneous motors and machines for producing mechanical power/thrust (F03B,D,G,H)); X15 (Non-Fossil Fuel Power Generating Systems)	X15-C01	F03B-013/22; F03B-003/14; F03B-003/18	CN202690315-U 23 Jan 2013 F03B-013/22 201335 Pages: 7 Chinese	CN202690315-U CN20259593 04 Jun 2012	CN20259593 04 Jun 2012	DIIDW:2013G31021
115	P	WO200238951-A1; JP2002147329-A; AU200212724-A	Movable object type wave energy converter for converting wave energy into mechanical energy.	HADANO K	HADANO K (HADA-Individual)	2002547533	NOVELTY - A wave energy converter grouped into a primary converter for converting a wave energy into the other mechanical energy, wherein a frame body for partitioning an area of sea is disposed around movable objects and guide side plates (4) are installed at the opening parts allowing seawater to be accessed, the depth (a) of the frame body being formed shorter than 1/6 of the length of the wav…	Q42 (Hydraulic engineering, soil shifting and sewerage (E02, 3)); Q55 (Positive displacement fluid machines/pumps/compressors (i.e. for driving fluid) (F04B,C)); X15 (Non-Fossil Fuel Power Generating Systems)	X15-C01	F03B-013/14; E02B-009/08	WO200238951-A1 16 May 2002 F03B-013/14 200258 Pages: 20 Japanese	WO200238951-A1 WOJP09753 07 Nov 2001	JP339774 08 Nov 2000	DIIDW:2002547533
116	P	WO2007020365-A1; AU2005335643-A1; EP1924576-A1; US2008211231-A1; CA2614864-A1; US7728453-B2; CA2614864-C	Wave energy converter e.g. ocean wave energy converter comprises buoyant or mounted container in seabed having pipes to exterior from base to receive wave peak and allow out flow of wave trough, and use water force to generate electricity.	EVANS A C	EVANS A C (EVAN-Individual)	2007373483	NOVELTY - A wave energy converter partially submerged in open sea, at constant distance to seabed, and is buoyant or mounted on platform, comprises: container (1) having interior connected to exterior via pipes (8, 9) in base; so that in response to rise and drop in water level relative to container due to passing of a wave peak and retaining of water inside container, and flow of wave trough out…	X15 (Non-Fossil Fuel Power Generating Systems)	X15-C01	A61K-031/44; A61K-031/505; C07D-401/14; F03B-013/10; F03B-013/00; F03B-013/14; F03B-013/22	WO2007020365-A1 22 Feb 2007 C07D-401/14 200735 Pages: 23 English	WO2007020365-A1 WOGB003205 15 Aug 2005	AU335643 15 Aug 2005	DIIDW:2007373483
117	P	WO2018147753-A1; PT109903-A1	Wave energy conversion device has two oscillating water columns, and a rear buoyancy module in conjunction with the rear turbine and the rear chamber limited by the intermediate dividing wall, by the lower plate and by the upper plate.	REZANEJAD K	INST SUPERIOR TECNICO (SUEP-C)	2018637462	NOVELTY - The wave energy conversion device has two oscillating water columns, and a rear buoyancy module (4) in conjunction with the rear turbine (10) and the rear chamber (2) limited by the intermediate dividing wall (6), by the lower plate (7) and by the upper plate (8). The anterior buoyancy module (3), the anterior turbine (9) and the anterior chamber (1) limited by the intermediate dividing…	Q54 (Non-positive displacement fluid engines (i.e. driven by fluid); Miscellaneous motors and machines for producing mechanical power/thrust (F03B,D,G,H)); X15 (Non-Fossil Fuel Power Generating Systems)	Q54-X; X15-C01	F03B-013/14; F03B-013/24	WO2018147753-A1 16 Aug 2018 F03B-013/14 201857 Pages: 25	WO2018147753-A1 WOPT000002 09 Feb 2018	PT109903 09 Feb 2017	DIIDW:2018637462
118	P	US2011057448-A1	Wave energy converter for converting ocean surface waves into electricity has two float members coupled through one rigid link to convert relative motion between rigid link and float members into electrical energy.	PAGE J	PAGE J (PAGE-Individual)	2011C45239	NOVELTY - The wave energy converter has two float members coupled through one rigid link (6) to convert the relative motion between the rigid link and float members into electrical energy. An induction generator comprises a mover and a stator mechanically coupled to either the rigid link or the float member to produce an electrical current based on the motion between the rigid link and the float …	Q54 (Non-positive displacement fluid engines (i.e. driven by fluid); Miscellaneous motors and machines for producing mechanical power/thrust (F03B,D,G,H)); X11 (Power Generation and High Power Machines); X15 (Non-Fossil Fuel Power Generating Systems)	X11-B; X15-C01	F03B-013/18	US2011057448-A1 10 Mar 2011 F03B-013/18 201120 Pages: 31 English	US2011057448-A1 US584561 08 Sep 2009	US584561 08 Sep 2009	DIIDW:2011C45239
119	P	IN202223005245-A	Wave energy converter, has power take off system allowing passage of liquid for converting reciprocating motion of piston into rotary motion of fixed turbine, and control mechanism engaging or disengaging connecting arms with piston.	DEVARAPALLI A	GOA SHIPYARD LTD (GOAS-Non-standard)	202389705P	NOVELTY - The converter (100) has an oscillating body (102a) exposed to a surface of a water body. A stationary body (104) is provided with a mooring arrangement to restrict motion of the stationary body, and a piston moves to and fro inside the body to oscillate a liquid in the body. Connecting arms (108a) are mounted on the body and convert movement of the body into reciprocating movement of pi…	Q54 (Non-positive displacement fluid engines (i.e. driven by fluid); Miscellaneous motors and machines for producing mechanical power/thrust (F03B,D,G,H)); V06 (Electromechanical Transducers and Small Machines); X15 (Non-Fossil Fuel Power Generating Systems); X11 (Power Generation and High Power Machines)	Q54-X; V06-M06; V06-M10; X15-C01C; X11-B01; X11-H03; X11-J05B	F03B-013/18; F03B-013/20; F03B-013/24; H02K-053/00; H02K-007/18	IN202223005245-A 04 Aug 2023 F03B-013/18 202369 English	IN202223005245-A IN23005245 31 Jan 2022	IN23005245 31 Jan 2022	DIIDW:202389705P
120	P	IN202141008403-A	Sea wave energy conversion device for holding and supporting sea wave energy conversion devices near surface of sea water, has electrical or hydraulic power generation equipment that is connected to sea waves energy conversion devices.	VOORADI R P	VOORADI R P (VOOR-Individual)	2021260562	NOVELTY - The energy conversion device has a long beam that holds sea-waves energy conversion devices. An unit is configured to hold and support long beam as always submerged below and adjacent to surface of sea-water, and anchor tie wires connected to unit to hold and support long beam supporting unit either to bed level of sea, or to nearby elevated objects. The device is supported by long beam…	Q54 (Non-positive displacement fluid engines (i.e. driven by fluid); Miscellaneous motors and machines for producing mechanical power/thrust (F03B,D,G,H)); X11 (Power Generation and High Power Machines); X15 (Non-Fossil Fuel Power Generating Systems)	Q54-X; X11-B; X11-J06A; X15-C01A	F03B-013/18; F03B-013/14; F03B-013/22; F03B-013/20; H02K-009/19	IN202141008403-A 05 Mar 2021 F03B-013/18 202128 Pages: 59 English	IN202141008403-A IN41008403 28 Feb 2021	IN41008403 28 Feb 2021	DIIDW:2021260562
121	P	CN203584674-U	Ocean wave-energy conversion device used in power generation field, has generator, reset mechanism and guide tube that are installed in upper mounting plate.	KUANG Z	FENIMA INNOVATION CO LTD (FENI-Non-standard)	2014M53659	NOVELTY - This utility new type claims a one wave energy convert device, comprise mounting platform on the upper of. and wherein the set of wave energy convert device, wave energy convert device comprise buoy rope, a generator, a catheter, and the one end for reciprocating movement of the rope of the reset mechanism, generator, a reset mechanism and one end of pipe are fixed mounted on the mounti…	Q54 (Non-positive displacement fluid engines (i.e. driven by fluid); Miscellaneous motors and machines for producing mechanical power/thrust (F03B,D,G,H)); X11 (Power Generation and High Power Machines); X15 (Non-Fossil Fuel Power Generating Systems)	X11-B; X11-J05; X15-C01A1	F03B-013/16	CN203584674-U 07 May 2014 F03B-013/16 201444 Pages: 9 Chinese	CN203584674-U CN20596000 25 Sep 2013	CN20596000 25 Sep 2013	DIIDW:2014M53659
122	P	WO2015082754-A1; EP3084208-A1; US2016369766-A1; EP3084208-A4	Wave energy conversion apparatus used in connection with panel, has actuating mechanism that converts power of circumferential speed of reciprocating panel at distance point to rotational movement of rotor of power-take-off machinery.	JAERVINEN A	AW-ENERGY OY (AWEN-Non-standard)	201533756P	NOVELTY - The apparatus has an actuating mechanism (8) that is configured to convert the power of the circumferential speed of a reciprocating panel (2) at a distance point being situated at the area of the upper half of the panel mechanically to a rotational movement of the rotor of the generator of a power-take-off machinery (11). The distance point is situated at the area of the upper fourth a…	Q54 (Non-positive displacement fluid engines (i.e. driven by fluid); Miscellaneous motors and machines for producing mechanical power/thrust (F03B,D,G,H)); X15 (Non-Fossil Fuel Power Generating Systems)	X15-C01; X15-C02	F03B-013/18; F03B-013/10; F03B-013/26; H02K-007/06; H02K-007/18	WO2015082754-A1 11 Jun 2015 F03B-013/18 201540 Pages: 25 English	WO2015082754-A1 WOFI051146 05 Dec 2013	EP898840 05 Dec 2013	DIIDW:201533756P
123	P	CN202483789-U	Wave energy conversion system, has wave collector collecting wave energy generated by potential energy conversion device, where potential energy conversion device converts kinetic energy into mechanical energy.	LI Q	LI Q (LIQQ-Individual)	2013A16666	NOVELTY - The system has a wave collector collecting wave energy generated by a potential energy conversion device. The potential energy conversion device converts kinetic energy into mechanical energy.	Q54 (Non-positive displacement fluid engines (i.e. driven by fluid); Miscellaneous motors and machines for producing mechanical power/thrust (F03B,D,G,H)); X15 (Non-Fossil Fuel Power Generating Systems)	X15-C01	F03B-013/22	CN202483789-U 10 Oct 2012 F03B-013/22 201303 Pages: 11 Chinese	CN202483789-U CN20412526 26 Oct 2011	CN20412526 26 Oct 2011	DIIDW:2013A16666
124	P	WO2021236422-A1	Adaptive wave energy harnessing system, has wave energy converter unit adaptable to characteristics of ocean waves, ocean shoreline, and ocean's floor to maximize energy harvested by adaptive wave energy converters unit.	LYMAN W R	IMPERIUM TERRA SOLUTIONS INC (IMPE-Non-standard)	2021D8431K	NOVELTY - The system has an adaptive wave energy converter unit, where the converter unit is positioned at or in a vicinity of a shoreline, and/or at or near a natural barrier to receive water flows caused by ocean waves approaching the shoreline. The converter unit adapts to characteristics of the ocean waves, the ocean shoreline and the ocean's floor to maximize energy harvested by the converte…	Q54 (Non-positive displacement fluid engines (i.e. driven by fluid); Miscellaneous motors and machines for producing mechanical power/thrust (F03B,D,G,H)); X15 (Non-Fossil Fuel Power Generating Systems)	Q54-D; Q54-X; X15-C01	F03B-013/10; F03B-013/14; F03B-013/18; F03B-013/22; F03B-009/00	WO2021236422-A1 25 Nov 2021 F03B-013/18 202198 Pages: 44 English	WO2021236422-A1 WOUS032327 13 May 2021	US026027P 16 May 2020	DIIDW:2021D8431K
125	P	US2008157532-A1; US7459802-B2	Marine wave energy conversion system has a rotary electric power generator and a subtransmission that produce electricity during the downward motion of weights secured over a clutch assembly engaged between pulley/sprockets of the system.	LOUI S	LOUI S (LOUI-Individual)	2008H30900	NOVELTY - Weights are secured over a clutch assembly engaged between two pairs of pulley/sprockets of the marine wave conversion system (10) to drive the weight-lifting belt/chain in one vertical direction to move the weights over the top most of a central support tube. The weight-lifting belt/chain is also driven in the same direction under the influence of gravity to allow the weights to free f…	Q54 (Non-positive displacement fluid engines (i.e. driven by fluid); Miscellaneous motors and machines for producing mechanical power/thrust (F03B,D,G,H)); W04 (Audio/Video Recording and Systems); X11 (Power Generation and High Power Machines); X15 (Non-Fossil Fuel Power Generating Systems)	W04-W07; X11-J05A; X11-J05B; X11-U01; X15-C01	F03B-013/14; F03B-013/10	US2008157532-A1 03 Jul 2008 F03B-013/14 200846 Pages: 14 English	US2008157532-A1 US955469 13 Dec 2007	US874956P 15 Dec 2006	DIIDW:2008H30900
126	P	GB2472625-A; GB2472625-B	Wave energy device e.g. flap type wave energy converter for power station, has buoyant flaps for extraction of energy from moving water when water causes oscillation of buoyant flaps.	CHAPLIN R V	UNIV LANCASTER (UYLA-Non-standard)	2011B73000	NOVELTY - The wave energy device has the buoyant flaps (121) for the extraction of energy from moving water when the water causes oscillation of the buoyant flaps. The buoyant flaps are hinged at the hinge axes (107). The hinge axes are inclined. The generators are driven by the movement of the buoyant flaps.	Q54 (Non-positive displacement fluid engines (i.e. driven by fluid); Miscellaneous motors and machines for producing mechanical power/thrust (F03B,D,G,H)); X15 (Non-Fossil Fuel Power Generating Systems)	X15-C01	F03B-013/18	GB2472625-A 16 Feb 2011 F03B-013/18 201114 Pages: 13 English	GB2472625-A GB014137 13 Aug 2009	GB014137 13 Aug 2009	DIIDW:2011B73000
127	P	BR102017026058-A2	Wave energy converter for converting mechanical energy of sea waves into electrical energy, has shaft connected to rod, and pivot structure connected to linear electrical generator, where end of pivot structure is connected to pivot.	TAVARES M V	TAVARES M V (TAVA-Individual)	201962398X	NOVELTY - The converter has a float (2) directly connected to a first rod (3) or pivot structure that is connected to a shaft (5). The shaft is connected to a second rod (6). The pivot structure is connected to a linear electrical generator (8). An end of the pivot structure is connected to a pivot (9).	Q54 (Non-positive displacement fluid engines (i.e. driven by fluid); Miscellaneous motors and machines for producing mechanical power/thrust (F03B,D,G,H)); X15 (Non-Fossil Fuel Power Generating Systems)	Q54-X; X15-C01	F03B-013/18	BR102017026058-A2 25 Jun 2019 F03B-013/18 201957 Pages: 10 English	BR102017026058-A2 BR10026058 04 Dec 2017	BR10026058 04 Dec 2017	DIIDW:201962398X
128	P	TW201042140-A; TW374220-B1	Wave energy converting device includes buoy,electrical generator, and linking portion,buoy has first space and second space.	CHIU C	UNIV CHAOYANG TECHNOLOGY (UVYT-C)	2011G52403	NOVELTY - This invention relates to a wave energy converting device. It includes a buoy, an electrical generator, and a linking portion. The buoy has a first space and a second space. The electrical generator is disposed on the buoy and connected with first and second electrical generating elements. Two linking elements of the linking portion are movably disposed in the first and the second space…	Q54 (Non-positive displacement fluid engines (i.e. driven by fluid); Miscellaneous motors and machines for producing mechanical power/thrust (F03B,D,G,H)); X11 (Power Generation and High Power Machines); X15 (Non-Fossil Fuel Power Generating Systems)	X11-B; X15-C01	F03B-013/14; H02K-035/02	TW201042140-A 01 Dec 2010 F03B-013/14 201139 Pages: 0 Chinese	TW201042140-A TW117283 25 May 2009	TW117283 25 May 2009	DIIDW:2011G52403
129	P	WO2021107849-A1; SE202051052-A1; EP4065458-A1; US2022403809-A1; EP4065458-A4	Buoy for wave energy converter system, has multiple buoyancy blocks that are connected directly or indirectly to central portion, which comprises bell mouth opening and attachment unit for wire or rope.	SIDENMARK M	OCEAN HARVESTING TECHNOLOGIES AB (OCEA-Non-standard)	202159816P	NOVELTY - The buoy (100) has multiple buoyancy blocks (130) that are connected directly or indirectly to the central portion (110), which comprises a bell mouth opening (112) and attachment unit (114) for a wire or rope. The bell mouth is a channel with a gradually increasing diameter towards an open end. A bell of the bell mouth opening is encapsulated in a cylinder. The central portion is made …	A88 (Mechanical engineering and tools e.g. valves, gears and conveyor belts.); Q24 (Ships; waterborne vessels; related equipment (B63)); Q54 (Non-positive displacement fluid engines (i.e. driven by fluid); Miscellaneous motors and machines for producing mechanical power/thrust (F03B,D,G,H)); Q63 (Couplings; clutches; brakes; springs; dampers (F16D,F)); X15 (Non-Fossil Fuel Power Generating System…	A12-H09; A12-T; Q24-P18; Q54-X; Q63-E02A; X15-C01	B63B-022/00; F03B-013/18; F16F-009/02; B63B-022/04; B63B-035/44; F16F-009/32; F16F-009/58	WO2021107849-A1 03 Jun 2021 B63B-022/00 202153 Pages: 47 English	WO2021107849-A1 WOSE051129 25 Nov 2020	SE051347 25 Nov 2019	DIIDW:202159816P
130	P	PH12021050399-A1	Wave energy converter buoy, has linear generator connected to buoy, where control system is used to regulate output voltage of linear generator, and power source is arranged inside buoy.	BAGALAY E S L	CAMARINES SUR POLYTECHNIC COLLEGES (CAMA-Non-standard)	202374176R	NOVELTY - The buoy has a linear generator connected to the buoy. A control system is used to regulate the output voltage of the linear generator. A power source is arranged inside the buoy, where a set of light emitting elements is arranged on the base of the buoy and a mooring system attached to the buoy.	Q54 (Non-positive displacement fluid engines (i.e. driven by fluid); Miscellaneous motors and machines for producing mechanical power/thrust (F03B,D,G,H)); W04 (Audio/Video Recording and Systems); X15 (Non-Fossil Fuel Power Generating Systems)	Q54-X; W04-X01K7A; X15-C01A1; X15-C03	F03B-013/18	PH12021050399-A1 06 Feb 2023 F03B-013/18 202358 Pages: 1 English	PH12021050399-A1 PH050399 28 Jul 2021	PH050399 28 Jul 2021	DIIDW:202374176R
131	P	WO2023034132-A1	Device for converting wave action to electrical energy in wave energy converters system, has tether with power takeoff component and connecting rigid body to another rigid body, where device includes two positions.	OGDEN D	ALLIANCE SUSTAINABLE ENERGY LLC (ALLU-C)	202326118W	NOVELTY - The device has two bodies comprising two rigid bodies (110, 130) and two variable geometry components (120, 140), respectively. A tether comprises a power takeoff component and connects the rigid bodies, where the device is operated in two positions. One of the variable geometry component includes a volume that is greater than another volume of other variable geometry component, where f…	Q54 (Non-positive displacement fluid engines (i.e. driven by fluid); Miscellaneous motors and machines for producing mechanical power/thrust (F03B,D,G,H)); X13 (Switchgear, Protection, Electric Drives); X15 (Non-Fossil Fuel Power Generating Systems)	Q54-X; X13-H02X; X15-C01	F03B-013/10; F03B-013/12; F03B-013/14; F03B-013/18; F03B-013/20; F03B-015/02; H02P-009/04	WO2023034132-A1 09 Mar 2023 F03B-013/14 202322 Pages: 40 English	WO2023034132-A1 WOUS041630 26 Aug 2022	US239070P 31 Aug 2021	DIIDW:202326118W
132	P	CN106223264-A; CN106223264-B	Wave energy generating function featured floating-type see-saw breakwater structure, has wave-proof plate fixed with power generating device that is provided with wave energy conversion unit group, and shell formed with inner cavity.	ZHAO X	UNIV ZHEJIANG (UYZH-C)	201680216X	NOVELTY - The structure has a rotating dam body connected with a floating body (3). The rotating dam body is fixed with a wave-proof plate (1) that is fixed with a power generating device. The power generating device is provided with a wave energy conversion unit group (2) that is fixed with a shell. The shell is formed with an inner cavity that is fixed with a guide rod. The wave energy conversi…	Q42 (Hydraulic engineering, soil shifting and sewerage (E02, 3)); Q54 (Non-positive displacement fluid engines (i.e. driven by fluid); Miscellaneous motors and machines for producing mechanical power/thrust (F03B,D,G,H)); X15 (Non-Fossil Fuel Power Generating Systems)	Q42-A02B; Q54-X; X15-C02	E02B-003/06; F03B-013/26; F03B-013/14; F03B-013/16	CN106223264-A 14 Dec 2016 E02B-003/06 201704 Pages: 10 Chinese	CN106223264-A CN10699035 22 Aug 2016	CN10699035 22 Aug 2016	DIIDW:201680216X
133	P	CN207750172-U; CN109931205-A	Free floating wave energy converting device, has independent floating body connected with connecting rod on movable connection of linear generator, and main body connected with cross shaft universal joint.	ZHOU W	ZHOU W (ZHOU-Individual)	201867138B	(CN207750172-U) NOVELTY - free floating wave energy conversion device to wave energy conversion device manufacturing field, independent floating on the sea surface connected by a connecting rod, the connecting rod comprises a telescopic and non-scalable, connecting at least one end set with a conversion element. one end at least is equipped with two groups of conversion element, a connecting rod,…	W06 (Aviation, Marine and Radar Systems); X15 (Non-Fossil Fuel Power Generating Systems); Q24 (Ships; waterborne vessels; related equipment (B63));	W06-C01; W06-C15G; X15-C01; Q24-P08; Q54-X; X15-C01C	B63B-035/44; F03B-011/00; F03B-013/14	CN207750172-U 21 Aug 2018 F03B-013/14 201865 Pages: 7 Chinese	CN207750172-U CN21838071 17 Dec 2017	CN11414743 17 Dec 2017	DIIDW:201867138B
134	P	WO2017143214-A1; US2019040841-A1	Wave energy conversion system for converting energy from wave patterns of body of water into electrical energy, has platform structure that includes horizontal stabilizing beam arranged in spaced relation to pod.	MARAMARA R	BRIMES ENERGY INC (BRIM-Non-standard)	201757919E	NOVELTY - The wave energy conversion system (100) has a pod (120) rotatably supported by a platform structure (110). The platform structure includes a horizontal stabilizing beam (116) arranged in spaced relation to the pod. Multiple vertical stabilizing beams (112) are configured to rotatably support the pod. A facet of the horizontal stabilizing beam facing the pod intersects each of the outer …	Q54 (Non-positive displacement fluid engines (i.e. driven by fluid); Miscellaneous motors and machines for producing mechanical power/thrust (F03B,D,G,H)); X15 (Non-Fossil Fuel Power Generating Systems)	Q54-X; X15-C01	F03B-013/12; F03B-013/18	WO2017143214-A1 24 Aug 2017 F03B-013/18 201759 Pages: 41 English	WO2017143214-A1 WOUS018409 17 Feb 2017	US296461P 17 Feb 2016	DIIDW:201757919E
135	P	US2018306164-A1; WO2018200502-A1; EP3615789-A1; EP3615789-A4; US11002243-B2	Submergible wave energy converter apparatus used in deep water operations, for converting wave energy to usable power, has power take-off unit that returns absorber housing from displaced to predefined equilibrium position.	LEHMANN M	LEHMANN M (LEHM-Individual)	201883207M	NOVELTY - The wave energy converter apparatus has an absorber which is provided with housing (101) with an upper surface and a bottom surface. A power take-off (PTO) unit is coupled to the absorber and is configured to displace movement of the absorber housing that is relative to a reference. The power take-off unit operable to perform motion energy conversion based on displacement of the absorbe…	Q54 (Non-positive displacement fluid engines (i.e. driven by fluid); Miscellaneous motors and machines for producing mechanical power/thrust (F03B,D,G,H)); X15 (Non-Fossil Fuel Power Generating Systems)	Q54-X; X15-C01C	F03B-013/10; F03B-013/18; F03B-013/14; F03B-013/20; F03B-015/00; F03B-013/00	US2018306164-A1 25 Oct 2018 F03B-013/10 201872 Pages: 34 English	US2018306164-A1 US960336 23 Apr 2018	US489386P 24 Apr 2017	DIIDW:201883207M
136	P	CN103850866-A	Double-toggle plate integrated wave energy conversion device, has rotating shaft driving generator producing electric power, and gear cylinder installed with buoyancy swinging plate and gravity swinging plate.	PENG W	UNIV CHANGSHA SCI & TECHNOLOGY (UYSG-C)	2014P83262	NOVELTY - The device has a generator fixed with a truss and a gear cylinder. The generator and the gear cylinder are connected with front and back ends of a swinging plate through the truss. A chain is fixed with the truss in specific angle. A rotating shaft driving generator produces an electric power. The gear cylinder is installed with buoyancy swinging plate and a gravity swinging plate.	Q54 (Non-positive displacement fluid engines (i.e. driven by fluid); Miscellaneous motors and machines for producing mechanical power/thrust (F03B,D,G,H)); X11 (Power Generation and High Power Machines); X15 (Non-Fossil Fuel Power Generating Systems)	X11-B; X11-J05; X15-C01	F03B-013/18	CN103850866-A 11 Jun 2014 F03B-013/18 201455 Pages: 8 Chinese	CN103850866-A CN10110618 24 Mar 2014	CN10110618 24 Mar 2014	DIIDW:2014P83262
137	P	US9140231-B1	Wave energy converter (WEC) used in resonant WEC e.g. one-portion resonant WEC, has controller that reactively controls operation of power take off based upon sensed condition pertaining to WEC and nonlinear model of WEC.	WILSON D G	SANDIA CORP (HONE-C)	201556834B	NOVELTY - The WEC (100) has a float (102), a spar (104), and waves that are configured to impact the float cause relative motion between the float and the spar. A power take off (PTO) is configured to convert the relative motion between the float and the spar to electrical energy. A controller (114) reactively controls operation of the PTO based upon a sensed condition pertaining to the WEC and a…	Q54 (Non-positive displacement fluid engines (i.e. driven by fluid); Miscellaneous motors and machines for producing mechanical power/thrust (F03B,D,G,H)); X13 (Switchgear, Protection, Electric Drives); X15 (Non-Fossil Fuel Power Generating Systems)	X13-H02X; X15-C01C	F03B-013/10; F03B-013/12; F03B-013/16; F03B-015/00; H02P-009/04	US9140231-B1 22 Sep 2015 F03B-013/10 201565 Pages: 14 English	US9140231-B1 US047700 07 Oct 2013	US047700 07 Oct 2013	DIIDW:201556834B
138	P	MY171979-A	Wave energy converter for converting wave energy into electricity, has electric generator and pulley that are provided on top of vessels, float that is pivoted on edge of vessels and belt that connects float and gear through pulley.	IBRAHIM M Z	UNIV MALAYSIA TERENGGANU (UYMA-Non-standard)	202097775C	NOVELTY - The converter (10) has an electric generator (22), a gear to drive the electric generator, a float (14), a pulley (18), a belt (20) and the two joined vessels (12). The electric generator and the pulley are provided on top of the vessels. The float is pivoted on an edge of the vessels. The belt connects the float and the gear through the pulley. The wave provides the relative oscillator…	Q54 (Non-positive displacement fluid engines (i.e. driven by fluid); Miscellaneous motors and machines for producing mechanical power/thrust (F03B,D,G,H)); X15 (Non-Fossil Fuel Power Generating Systems)	Q54-X; X15-C01	F03B-013/18	MY171979-A 11 Nov 2019 F03B-013/18 202084 Pages: 11 English	MY171979-A MY701726 20 Sep 2013	MY701726 20 Sep 2013	DIIDW:202097775C
139	P	JP2003206845-A	Wave energy converter has revolving double ratchet mechanism that converts swinging movement of floating type shock plate into rotary motion of electric power generation shaft.		KAJIMA CORP (KAJI-C)	2003736492	NOVELTY - A revolving double ratchet mechanism (15) converts the swinging movement of a floating type shock plate (3) due to wave energy, into rotary motion of a electric power generation shaft (19).	Q55 (Positive displacement fluid machines/pumps/compressors (i.e. for driving fluid) (F04B,C)); X15 (Non-Fossil Fuel Power Generating Systems)	X15-C01	F03B-013/14	JP2003206845-A 25 Jul 2003 F03B-013/14 200370 Pages: 12	JP2003206845-A JP005789 15 Jan 2002	JP005789 15 Jan 2002	DIIDW:2003736492
140	P	JP2013036363-A; JP5896640-B2	Wave energy converter for converting wave energy into air energy for wave-powered-electricity-generation system using air turbine, has closed part arranged in water channel, where projecting wall divides water channel.	KIHARA K	MITSUBISHI HEAVY IND BRIDGE & STEEL STRU (MITO-C)	2013C60015	NOVELTY - The converter (1) has a caisson (2) provided with an air chamber (R) for converting wave energy into water-column vibration. A projecting wall (3) divides a water channel (W) for deriving a wave into the caisson. A closed part (4) is arranged in the water channel. A bottom raising part (5) performs bottom raising of the water channel. A rectification part rectifies fluid in the air cham…	Q54 (Non-positive displacement fluid engines (i.e. driven by fluid); Miscellaneous motors and machines for producing mechanical power/thrust (F03B,D,G,H)); X15 (Non-Fossil Fuel Power Generating Systems)	X15-C01	F03B-013/24	JP2013036363-A 21 Feb 2013 F03B-013/24 201318 Pages: 15 Japanese	JP2013036363-A JP171376 04 Aug 2011	JP171376 04 Aug 2011	DIIDW:2013C60015
141	P	CN202117834-U	Ocean wave energy conversion type power generation system has main shaft connected between water turbine and speed increasing gear box and double fed asynchronous generator connected to gear box.	GUO J	GUODIAN UNITED POWER TECHNOLOGY CO LTD (CGUO-C)	2012B75733	NOVELTY - The ocean wave energy conversion type power generation system has a main shaft (2) connected between water turbine (1) and speed increasing gear box (3) and a double fed asynchronous generator (4) connected between gear box and an excitation converter. The excitation converter has generator side converter and network side converter connected through a direct current (DC) capacitor. The …	Q54 (Non-positive displacement fluid engines (i.e. driven by fluid); Miscellaneous motors and machines for producing mechanical power/thrust (F03B,D,G,H)); U24 (Amplifiers and Low Power Supplies); X11 (Power Generation and High Power Machines); X12 (Power Distribution/Components/Converters); X13 (Switchgear, Protection, Electric Drives); X15 (Non-Fossil Fuel Power Generating Systems)	U24-D; U24-H; X11-B01; X11-H02C; X12-H01B; X12-J; X13-G02A; X15-C01	F03B-013/12; F03B-003/12; H02J-003/38; H02P-009/30	CN202117834-U 18 Jan 2012 F03B-013/12 201212 Pages: 6 Chinese	CN202117834-U CN20210492 21 Jun 2011	CN20210492 21 Jun 2011	DIIDW:2012B75733
142	P	WO2023039268-A1; US2023094604-A1; US11933262-B2	Wave energy converter (WEC) system has power dissipation system that manages peak loads in WEC system by dissipating peak energy spikes caused by relative movement of reaction structure and float.	MUNDON T R	OSCILLA POWER INC (OSCI-Non-standard)	202328752N	NOVELTY - The system (100) has a float and a drivetrain (110). A reaction structure is coupled to the drivetrain by tendon (106). A power dissipation system is coupled to the drivetrain. The power dissipation system is configured to manage peak loads in the WEC system by dissipating peak energy spikes caused by relative movement of the reaction structure and the float. The power dissipation syste…	Q54 (Non-positive displacement fluid engines (i.e. driven by fluid); Miscellaneous motors and machines for producing mechanical power/thrust (F03B,D,G,H)); V06 (Electromechanical Transducers and Small Machines); X11 (Power Generation and High Power Machines); X15 (Non-Fossil Fuel Power Generating Systems)	Q54-X; V06-M10; X11-B; X11-J05B; X15-C01	F03B-013/10; F03B-013/12; F03B-013/20; H02K-007/18; F03B-013/14; F15B-021/0423	WO2023039268-A1 16 Mar 2023 F03B-013/20 202325 Pages: 44 English	WO2023039268-A1 WOUS043265 12 Sep 2022	US242612P 10 Sep 2021	DIIDW:202328752N
143	P	CN213358489-U	Ocean environment monitoring platform, has rotating rod whose side wall is rotatably connected with side wall of wave energy converting box through bearing, where top side wall of wave energy conversion box is provided with detecting component.	ZHANG J	HAINAN CSSC LANTAI OCEAN ENG CO LTD (CHSB-C)	202168496W	NOVELTY - The utility model claims a marine environment monitoring platform using wave energy, comprising a concrete bottom column, the concrete bottom column is located on the coast base, the top end of the concrete bottom column is provided with a wave energy conversion tank, the bottom end of the wave energy conversion tank is fixedly connected with the side wall of the concrete bottom column …	Q42 (Hydraulic engineering, soil shifting and sewerage (E02, 3)); Q54 (Non-positive displacement fluid engines (i.e. driven by fluid); Miscellaneous motors and machines for producing mechanical power/thrust (F03B,D,G,H)); X15 (Non-Fossil Fuel Power Generating Systems)	Q42-A03; Q54-A05; Q54-X; X15-C01	E02B-001/00; E02B-009/08; F03B-013/22; F03B-003/12; F21V-033/00; F21Y-115/10	CN213358489-U 04 Jun 2021 E02B-001/00 202151 Pages: 8 Chinese	CN213358489-U CN21482533 24 Jul 2020	CN21482533 24 Jul 2020	DIIDW:202168496W
144	P	CN201972838-U	Storm impact resistant large wave generating device, has hydraulic oil cylinder whose piston rod is connected with wave energy conversion floating cylinder by penetrating through supporting platform.	WANG W	UNIV ZHEJIANG OCEAN (UYZO-C)	2011M78886	NOVELTY - The device has a hydraulic oil cylinder (5), a large hydraulic motor driving generating device (4) and a small hydraulic motor driving generating device (6) that are provided in a wave generating chamber (7). A piston rod of the oil cylinder is fixed with a wave energy conversion floating cylinder (1) by penetrating via a supporting platform (3). A top end of a guide pole (2) is connect…	Q54 (Non-positive displacement fluid engines (i.e. driven by fluid); Miscellaneous motors and machines for producing mechanical power/thrust (F03B,D,G,H)); X15 (Non-Fossil Fuel Power Generating Systems)	X15-C01	F03B-013/22	CN201972838-U 14 Sep 2011 F03B-013/22 201170 Pages: 5 Chinese	CN201972838-U CN20125924 14 Apr 2011	CN20125924 14 Apr 2011	DIIDW:2011M78886
145	P	GB2509201-A	Wave energy conversion device for extracting energy from waves, has each energy absorber or its working surface displaceable in response to change in pressure or force on working surface so as to drive working fluid in chamber.	GREY S	AWS OCEAN ENERGY LTD (AWSO-Non-standard)	2014M09810	NOVELTY - The wave energy conversion device (5) has each energy absorber (25) with a working surface (35) supported by each of parallel support structures (10,15). A chamber for receiving working fluid such as air is defined in the absorber or working surface. The energy absorber or working surface is displaceable relative to change in pressure or force exerted on the working surface, driving the…	Q54 (Non-positive displacement fluid engines (i.e. driven by fluid); Miscellaneous motors and machines for producing mechanical power/thrust (F03B,D,G,H)); X15 (Non-Fossil Fuel Power Generating Systems)	X15-C01	F03B-013/14; F03B-013/18; F03B-013/24	GB2509201-A 25 Jun 2014 F03B-013/18 201446 Pages: 52 English	GB2509201-A GB015306 28 Aug 2013	GB018357 12 Oct 2012	DIIDW:2014M09810
146	P	GB2480337-A; GB2480337-B	Wave energy converter for use in wave energy conversion system, has orientating mechanism adjusting orientation of power take off in response to changes in orientation of wave energy absorber.	DICK W	WAVEBOB LTD (WAVE-Non-standard)	2011P07137	NOVELTY - The converter (400) has a wave energy absorber (105) for absorbing wave energy. A power take off (PTO) (405) is coupled to the wave absorber for harnessing wave energy. An orientating mechanism i.e. gimbal, adjusts orientation of the PTO in response to changes in the orientation of the wave energy absorber. The PTO comprises pinions (425a, 425b) engage a rack (422) such that reciprocal …	Q54 (Non-positive displacement fluid engines (i.e. driven by fluid); Miscellaneous motors and machines for producing mechanical power/thrust (F03B,D,G,H)); X15 (Non-Fossil Fuel Power Generating Systems)	X15-C01C	F03B-013/20	GB2480337-A 16 Nov 2011 F03B-013/20 201176 Pages: 20 English	GB2480337-A GB012162 20 Jul 2010	IE000305 13 May 2010	DIIDW:2011P07137
147	P	CN117685159-A	Wave energy conversion device applied to marine monitoring system, has resonator array that is provided with multiple resonators for converting vibrations of waves, and energy collector is arranged at appointed position and used for collecting energy of in-plane vibration.	CHEN L	UNIV SHANGHAI (USHN-C)	202428637V	NOVELTY - The device has a resonator array (1) and an energy collector (3). The resonator array is provided with multiple resonators (2) for converting the vibrations of the waves from out-of-plane vibrations to in-plane vibrations and concentrating them to a designated position. The energy collector is arranged at the appointed position and used for collecting the energy of the in-plane vibratio…	Q54 (Non-positive displacement fluid engines (i.e. driven by fluid); Miscellaneous motors and machines for producing mechanical power/thrust (F03B,D,G,H)); X15 (Non-Fossil Fuel Power Generating Systems)	Q54-X; X15-C01; X15-C03	F03B-011/00; F03B-013/14	CN117685159-A 12 Mar 2024 F03B-013/14 202426 Chinese	CN117685159-A CN11803989 25 Dec 2023	CN11803989 25 Dec 2023	DIIDW:202428637V
148	P	CN111255619-A	Ocean wave energy conversion device, has first deforming component, power generating device and second deforming component sequentially connected with each other.	CAI X	CAI X (CAIX-Individual)	202053617U	NOVELTY - The device has a first deforming component (10), a power generating device (30) and a second deforming component (20) sequentially connected with each other. The first deforming component and the second deforming component are alternately arranged along direction from far sea to a coast area. The first deforming component and the second deforming component are respectively formed with d…	Q54 (Non-positive displacement fluid engines (i.e. driven by fluid); Miscellaneous motors and machines for producing mechanical power/thrust (F03B,D,G,H)); X15 (Non-Fossil Fuel Power Generating Systems)	Q54-X; X15-C01	F03B-013/22	CN111255619-A 09 Jun 2020 F03B-013/22 202052 Pages: 11 Chinese	CN111255619-A CN10078451 03 Feb 2020	CN10078451 03 Feb 2020	DIIDW:202053617U
149	P	WO2009064237-A1; SE200702508-A; SE532254-C2	Wave e.g. ocean wave, energy conversion system, has buoyant working member connected to support member to allow energy, to be transferred to support member, caused by influence of waves on buoyant working member in relation to liquid level.	NORDLANDER P	FRAME ENERGY AB (FRAM-Non-standard)	2009J57164	NOVELTY - The system (100) has a buoyant support member (101) including a hollow cylinder made of steel, and elongated so as to establish a reference liquid level. A buoyant working member (108) is connected to the support member by a mechanical linkage e.g. arm (110), so as to allow energy, to be transferred to the support member, caused by influence of waves on the buoyant working member in rel…	Q54 (Non-positive displacement fluid engines (i.e. driven by fluid); Miscellaneous motors and machines for producing mechanical power/thrust (F03B,D,G,H)); X15 (Non-Fossil Fuel Power Generating Systems)	X15-C01	F03B-013/18	WO2009064237-A1 22 May 2009 F03B-013/18 200935 Pages: 31 English	WO2009064237-A1 WOSE000642 14 Nov 2008	SE002508 14 Nov 2007	DIIDW:2009J57164
150	P	EP4148266-A1; WO2023036392-A1	Bottom-hinged wave energy converter (WEC) for use in gravity or anchored floating WEC system, has flap whose cross-section is constant between or varies between or increases between flap bottom and flap top to define flap buoyancy.	WIGANT L	PATENTSELSKABET AF 30 NOVEMBER 2014 APS (PATE-Non-standard)	202327588G	NOVELTY - The bottom-hinged wave energy converter (WEC) comprises a foundation (10) defining an apparent foundation weight. A power converter (20) connected to the foundation, comprises a crank (22). A flap arm (30) comprises a crank end (34) connected to the crank and a flap end (36) along an arm axis (32). A cone-shaped flap comprises a flap bottom (42) connected to the flap end, and a flap top…	Q54 (Non-positive displacement fluid engines (i.e. driven by fluid); Miscellaneous motors and machines for producing mechanical power/thrust (F03B,D,G,H)); X15 (Non-Fossil Fuel Power Generating Systems)	Q54-X; X15-C01	F03B-013/18; F03B-013/20	EP4148266-A1 15 Mar 2023 F03B-013/18 202329 Pages: 22 English	EP4148266-A1 EP196097 10 Sep 2021	EP196097 10 Sep 2021	DIIDW:202327588G
151	P	CN107559131-A; CN107559131-B	Suspension swinging and oscillating water column wave energy-coupling power generation device, has first rotary vane pump connected with second rotary vane pump to form hydraulic loop that is connected with hydraulic motor.	LING C	UNIV GUANGDONG OCEAN (UYOG-C)	2018047449	NOVELTY - The device has a hydraulic motor (31) connected with a generator (33) by a transmission part (32). A hanging pendulum type wave energy converting mechanism (1) is provided with a first rotary vane pump (6). An oscillating water column wave energy conversion mechanism (7) is provided with a second rotary vane pump (15). The first rotary vane pump is connected with the second rotary vane …	Q54 (Non-positive displacement fluid engines (i.e. driven by fluid); Miscellaneous motors and machines for producing mechanical power/thrust (F03B,D,G,H)); X11 (Power Generation and High Power Machines); X15 (Non-Fossil Fuel Power Generating Systems)	Q54-X; X11-B01; X11-B10; X15-C01C	F03B-013/14; F03B-015/00	CN107559131-A 09 Jan 2018 F03B-013/14 201808 Pages: 9 Chinese	CN107559131-A CN10741763 25 Aug 2017	CN10741763 25 Aug 2017	DIIDW:2018047449
152	P	US2007126239-A1; WO2007064827-A2; WO2007064827-A3; EP1954941-A2; AU2006320515-A1; US7443046-B2; JP2009518568-W; WO2010047677-A1; AU2006320515-B2; AU2006320515-C1; JP2013083267-A; JP5295777-B2; CA2632158-C; JP5689485-B2; EP1954941-A4; EP1954941-B1; ES2874758-T3	Wave energy converter system has a spring that enables a reaction mass to undergo a given replacement while having a lesser movement and a power take-off device that converts the motion of the shell and the mass into electric energy.	STEWART D B	STEWART D B (STEW-Individual)	2007635211	NOVELTY - A shell (10) and an internal oscillator are constructed so that there is a relative motion between the shell and a reaction mass in response to waves in the body of water. A power take-off device is coupled between the internal oscillator and the shell to convert their relative motion into electric energy. A spring being connected between the shell and the reaction mass is designed so t…	Q54 (Non-positive displacement fluid engines (i.e. driven by fluid); Miscellaneous motors and machines for producing mechanical power/thrust (F03B,D,G,H)); X11 (Power Generation and High Power Machines); X15 (Non-Fossil Fuel Power Generating Systems)	X11-J05X; X11-U01B; X15-C01	F03B-013/10; F03B-013/12; H02P-009/04; F03B-013/20; F03B-013/16; H02K-035/00; F03B-013/18	US2007126239-A1 07 Jun 2007 F03B-013/12 200760 Pages: 22 English	US2007126239-A1 US607386 01 Dec 2006	US741108P 01 Dec 2005	DIIDW:2007635211
153	P	CN110273809-A; CN110273809-B	Wave energy conversion device, has shell fixedly connected with fixing bracket, and single-way ratchet wheel connected with rotating pole to generate rotary motion and convert rotary motion into unidirectional motion.	FANG H	UNIV TIANJIN (UTIJ-C)	2019825273	NOVELTY - The device has a shell (2) fixedly connected with a fixing bracket (1). A transmission shaft (10) is connected with a generator and a floater. The floater is provided with a floating part (3) to generate sea surface wave absorbing energy and deep sea water wave absorption energy. The floater is formed with a spiral through-hole that is matched with a rotating rod. The rotating rod is lo…	Q54 (Non-positive displacement fluid engines (i.e. driven by fluid); Miscellaneous motors and machines for producing mechanical power/thrust (F03B,D,G,H)); X15 (Non-Fossil Fuel Power Generating Systems)	Q54-X; X15-C01	F03B-013/18	CN110273809-A 24 Sep 2019 F03B-013/18 201979 Pages: 7 Chinese	CN110273809-A CN10528364 18 Jun 2019	CN10528364 18 Jun 2019	DIIDW:2019825273
154	P	CN202117838-U	Ocean wave energy conversion type power generation device has ratchet lever hinged with floating connection rod connected with float and engaged with ratchet wheel sleeved on main shaft.	ZHENG J	ZHENG J (ZHEN-Individual)	2012B75730	NOVELTY - The ocean wave energy conversion type power generation device has generator set in a main box (1). A ratchet lever (4) has a middle support point set on the main box and hinged with a floating connection rod (3) connected with a float (2). The ratchet lever is engaged with a ratchet wheel (5) sleeved on a main shaft (8) linked with an input shaft. The ratchet lever is connected to a paw…	Q54 (Non-positive displacement fluid engines (i.e. driven by fluid); Miscellaneous motors and machines for producing mechanical power/thrust (F03B,D,G,H)); X11 (Power Generation and High Power Machines); X15 (Non-Fossil Fuel Power Generating Systems)	X11-B; X11-J05A; X11-J05B; X15-C01	F03B-013/16; H02K-007/10; H02K-007/18	CN202117838-U 18 Jan 2012 F03B-013/16 201212 Pages: 8 Chinese	CN202117838-U CN20236624 04 Jul 2011	CN20236624 04 Jul 2011	DIIDW:2012B75730
155	P	IN202241062463-A	System for facilitating double-row floating breakwater integrated power generation from wave-energy using wave energy converting device, has horizontal axis oscillating water column for converting surge and pitch motion of incoming ocean waves into electrical energy.	PATIL S B	NAT TECHNOLOGY KARNATAKA SURATHKAL INST (NATE-Non-standard)	202331489N	NOVELTY - The system (101) has attenuators (13) for interconnecting a set of wave-energy converting devices (14) to form an array of wave-energy converting devices. A Maxwell wheel generator (1) converts pitch motion of an incoming ocean wave (17) into mechanical energy. A U-shaped oscillating water column (UOWC) (7) converts lateral and vertical movement of a liquid (15a) into mechanical energy.…	Q54 (Non-positive displacement fluid engines (i.e. driven by fluid); Miscellaneous motors and machines for producing mechanical power/thrust (F03B,D,G,H)); Q42 (Hydraulic engineering, soil shifting and sewerage (E02, 3)); X15 (Non-Fossil Fuel Power Generating Systems); X11 (Power Generation and High Power Machines)	Q54-X; Q42-A; X15-C01; X11-B	E02B-003/06; F03B-013/14; F03B-013/18; F03B-013/20; F03B-013/24	IN202241062463-A 17 Mar 2023 E02B-003/06 202326 English	IN202241062463-A IN41062463 02 Nov 2022	IN41062463 02 Nov 2022	DIIDW:202331489N
156	P	WO2023283407-A1; US2023010245-A1	Linear module for wave energy conversion, has direct drive linear machine for converting linear mechanical motion into electrical energy.	MCCALL A L	DEHLSEN ASSOC LLC (DEHL-Non-standard)	2023070055	NOVELTY - The linear module (101) has an actuated subassembly (102) having an actuated shell (201) and a passive translator (202) supported by the actuated shell. A reference subassembly (103) has a reference shell (301) concentrically received in the actuated shell and an active stator (302). The actuated subassembly and the reference subassembly configured to telescopically reciprocate longitud…	Q54 (Non-positive displacement fluid engines (i.e. driven by fluid); Miscellaneous motors and machines for producing mechanical power/thrust (F03B,D,G,H)); V06 (Electromechanical Transducers and Small Machines); X11 (Power Generation and High Power Machines); X15 (Non-Fossil Fuel Power Generating Systems)	Q54-X; V06-M10; X11-B; X11-J05B; X15-C01	F03B-013/00; F03B-013/12; F03B-013/18; H02K-007/18; F03B-013/10	WO2023283407-A1 12 Jan 2023 F03B-013/18 202308 Pages: 37 English	WO2023283407-A1 WOUS036462 08 Jul 2022	US220009P 09 Jul 2021	DIIDW:2023070055
157	P	CN206206062-U	Mushroom oscillating water column wave energy conversion device, has water column for forcing air inside air chamber to compress and expand, and air pipeline propelled turbine whose top part rotates generating device through air chamber.	ZHANG C	UNIV DALIAN TECHNOLOGY (UYDA-C)	2017372854	NOVELTY - The utility model claims a "mushroom" oscillating water column wave energy converting device, belonging to the technical field of new energy utilization. the "mushroom" oscillating water column wave energy conversion device comprises air chamber, base structure and turbine generating device, air chamber is composed of a cylindrical ring body and a hemispherical, hemispherical ring locat…	Q54 (Non-positive displacement fluid engines (i.e. driven by fluid); Miscellaneous motors and machines for producing mechanical power/thrust (F03B,D,G,H)); X11 (Power Generation and High Power Machines); X15 (Non-Fossil Fuel Power Generating Systems)	Q54-X; X11-B01; X15-C01B2	F03B-013/14	CN206206062-U 31 May 2017 F03B-013/14 201740 Pages: 5 Chinese	CN206206062-U CN21305579 01 Dec 2016	CN21305579 01 Dec 2016	DIIDW:2017372854
158	P	US2010122529-A1	Kinetically balanced wave energy converter for extracting mechanical energy of e.g. waves, from sea into useful mechanical energy, has two movable elements moving buoyant body along length of flexible member.	KROLL W S	KROLL W S (KROL-Individual)	2010F35058	NOVELTY - The converter has a mooring system attached a flexible member (3) i.e. tether. The flexible member attaches rotating mechanical elements together. Two movable elements move a buoyant body i.e. buoyant shell (2), along a length of the flexible member. A reactionary free moving weight (7) is attached to a free end of the flexible member, and is provided to a wave energy converter's shell.…	Q54 (Non-positive displacement fluid engines (i.e. driven by fluid); Miscellaneous motors and machines for producing mechanical power/thrust (F03B,D,G,H)); X15 (Non-Fossil Fuel Power Generating Systems)	X15-C01	F03B-013/18	US2010122529-A1 20 May 2010 F03B-013/18 201034 Pages: 9 English	US2010122529-A1 US313043 17 Nov 2008	US313043 17 Nov 2008	DIIDW:2010F35058
159	P	WO2013188397-A1	Linear array of component wave-energy converters, has component oscillating wave surge converters that are arranged in configuration, vertical region separating vertical edges of adjacent component oscillating wave surge converters.	WILLIAMS A R	RESOLUTE MARINE ENERGY INC (RESO-Non-standard)	2013X24032	NOVELTY - The linear array of component wave-energy converters has two component oscillating wave surge converters (100). Each component oscillating wave surge converter includes a paddle (101) and a hinge (103) configured to attach the paddle to a stationary surface (102). The component oscillating wave surge converters are arranged in an end-to-end configuration with a narrow, vertical region (…	Q54 (Non-positive displacement fluid engines (i.e. driven by fluid); Miscellaneous motors and machines for producing mechanical power/thrust (F03B,D,G,H)); X15 (Non-Fossil Fuel Power Generating Systems)	X15-C01	F03B-013/14	WO2013188397-A1 19 Dec 2013 F03B-013/14 201401 Pages: 23 English	WO2013188397-A1 WOUS045170 11 Jun 2013	US658718P 12 Jun 2012	DIIDW:2013X24032
160	P	CN107542619-A; CN107542619-B	Hydraulic wave energy converter, has piston rod whose end is fixed on end of hydraulic cylinder, where another end of hydraulic cylinder is connected with hydraulic motor that is connected with generator to drive generator.	WANG Y	UNIV SHANGHAI JIAOTONG (USJT-C)	2018037573	NOVELTY - The converter has a rotating wheel fixed on a floating body. The rotating wheel is connected with a driving gear to drive the driving gear to rotate. A driven gear is engaged with the driving gear. An end of a piston rod is fixed on a side surface of the driven gear. Another end of the piston rod is fixed on an end of a hydraulic cylinder. Another end of the hydraulic cylinder is connec…	Q54 (Non-positive displacement fluid engines (i.e. driven by fluid); Miscellaneous motors and machines for producing mechanical power/thrust (F03B,D,G,H)); X15 (Non-Fossil Fuel Power Generating Systems)	Q54-X; X15-C01	F03B-013/14	CN107542619-A 05 Jan 2018 F03B-013/14 201808 Pages: 5 Chinese	CN107542619-A CN10760177 30 Aug 2017	CN10760177 30 Aug 2017	DIIDW:2018037573
161	P	AU9940105-A; AU751252-B	Wane energy conversion apparatus has structure submerged below sea level placed side on to sea wave front, with crests of waves flowing through superstructure to power turbines.	STEIN J	STEIN J (STEI-Individual)	2000224918	NOVELTY - Apparatus for wave energy conversion has a structure cross-shaped in cross-section. Most of the structure (28) is submerged below the sea level (22) and placed side on to the sea wave front. A superstructure protrudes above sea level, open to the sea waves, housing turbines (56) driving electric generators (42). The crests of the waves flow through the superstructure (64) powering the t…	W06 (Aviation, Marine and Radar Systems); X11 (Power Generation and High Power Machines); X15 (Non-Fossil Fuel Power Generating Systems); Q55 (Positive displacement fluid machines/pumps/compressors (i.e. for driving fluid) (F04B,C))	W06-C01C3; X11-U05; X15-C01	H02N-011/00; F03B-013/22	AU9940105-A 24 Feb 2000 H02N-011/00 200020 Pages: 19 English	AU9940105-A AU040105 14 Jul 1999	AU004901 29 Jul 1998	DIIDW:2000224918
162	P	US8359855-B1	Wave energy converter mounted on vessel floating in ocean, has ball and socket to create gap between floating base and containing enclosure, to allow containing enclosure to pivot and rotate around ball and socket.	FAGAN M	FAGAN M (FAGA-Individual)	2013B48278	NOVELTY - The converter has a floating base (104) positioned on a body of water. A containing enclosure (102) features an unobstructed internal cavity which contains a fluid. A series of energy collectors is positioned on the floating base at points of contact between the floating base and containing enclosure. A ball and a socket create a gap between the floating base and containing enclosure to…	A88 (Mechanical engineering and tools e.g. valves, gears and conveyor belts.); Q54 (Non-positive displacement fluid engines (i.e. driven by fluid); Miscellaneous motors and machines for producing mechanical power/thrust (F03B,D,G,H)); X15 (Non-Fossil Fuel Power Generating Systems)	A12-H; X15-C01	F03B-013/10; F03B-013/12; F03B-013/18	US8359855-B1 29 Jan 2013 F03B-013/18 201310 Pages: 14 English	US8359855-B1 US387999 12 May 2009	US127295P 12 May 2008	DIIDW:2013B48278
163	P	US2003155774-A1; WO2003071128-A2; AU2003213077-A1; US6768217-B2; EP1516118-A2; NO200500496-A; JP2005530075-W; NZ534725-A; AU2003213077-B2; JP4436684-B2; CA2476627-C; WO2003071128-A3; EP1516118-B1; ES2383678-T3; EP1516118-A4	Wave energy converter has elongated hollow tube with buffer assembly or spring that limits movement of tube in response to excessively heavy surface wave.	CHALMERS P D	CHALMERS P D (CHAL-Individual)	2003811220	NOVELTY - An elongated hollow tube (10) submerged within the ocean, has a buffer assembly such as spring that limits the movement of the hollow tube in response to excessively heavy surface wave. A hydraulic cylinder (46) connected to the hollow tube, converts the kinetic energy of the hollow tube of electrical energy.	Q55 (Positive displacement fluid machines/pumps/compressors (i.e. for driving fluid) (F04B,C)); X13 (Switchgear, Protection, Electric Drives); X15 (Non-Fossil Fuel Power Generating Systems)	X13-G02X; X15-C01	H02P-009/04; F03B-013/10; F03B-013/12; F03B-000/00; F03B-013/18; F03B-013/14	US2003155774-A1 21 Aug 2003 H02P-009/04 200376 Pages: 10 English	US2003155774-A1 US080181 20 Feb 2002	US080181 20 Feb 2002	DIIDW:2003811220
164	P	CN116624315-A	Novel point-absorbing wave energy conversion device for wave energy power generation technology, has energy conversion system that is located in floating body, where energy leading-in shaft is connected with energy input portion of energy conversion system.	LI B	PLA ACAD MILITARY SCI SYSTEM ENG INST (JSYX-C)	202391393T	NOVELTY - The novel point-absorbing wave energy conversion device comprises a floating system and a damping system, where the floating system is provided with a floating body (1) and a central guide shaft (4). The floating body floats on a water surface, where the central guide shaft is fixed at a central position of a bottom of the floating body. A horizontal cross section area of the floating b…	Q54 (Non-positive displacement fluid engines (i.e. driven by fluid); Miscellaneous motors and machines for producing mechanical power/thrust (F03B,D,G,H)); X15 (Non-Fossil Fuel Power Generating Systems); X11 (Power Generation and High Power Machines)	Q54-X; X15-C01; X11-B01	F03B-011/00; F03B-011/04; F03B-013/16	CN116624315-A 22 Aug 2023 F03B-013/16 202372 Chinese	CN116624315-A CN10634470 31 May 2023	CN10634470 31 May 2023	DIIDW:202391393T
165	P	CN205744268-U	Mixed wave energy generating device, has hydraulic energy output system provided with lifting and sinking cylinder, rectifying valve group and swinging hydraulic cylinder, and hydraulic motor connected with generator.	LENG J	UNIV ZHEJIANG (UYZH-C)	201676179P	NOVELTY - The utility model claims a mixed wave energy generating device, comprising a wave energy converting device capable of absorbing float multiple degrees of freedom motion energy and arranged to wave energy into the hydraulic energy output system inside the device, belonging to the wave energy power generation device. Wave energy conversion device converts the energy of the wave is capture…	Q54 (Non-positive displacement fluid engines (i.e. driven by fluid); Miscellaneous motors and machines for producing mechanical power/thrust (F03B,D,G,H)); X11 (Power Generation and High Power Machines); X15 (Non-Fossil Fuel Power Generating Systems)	Q54-X; X11-B01; X15-C01	F03B-011/00; F03B-013/18	CN205744268-U 30 Nov 2016 F03B-013/18 201683 Pages: 7 Chinese	CN205744268-U CN20428186 11 May 2016	CN20428186 11 May 2016	DIIDW:201676179P
166	P	CN102705147-A; CN102705147-B	Wave energy converting device, has flow-guiding device for collecting wave energy to produce larger kinetic energy, impeller device pushed to be rotated by output mechanical energy, and transmission device provided with gear set.	GUAN T	GUAN T (GUAN-Individual)	2013A72722	NOVELTY - The device has a flow-guiding device for collecting wave energy to produce larger kinetic energy. An impeller device is pushed to be rotated by output mechanical energy. The flow-guiding device is provided with four flow-guiding units. An energy converting output unit is provided with a generating unit that is provided with a gearbox device, a generator and a mechanical transmission dev…	Q54 (Non-positive displacement fluid engines (i.e. driven by fluid); Miscellaneous motors and machines for producing mechanical power/thrust (F03B,D,G,H)); X15 (Non-Fossil Fuel Power Generating Systems)	Q54-X; X15-C01A9	B63B-035/00; F03B-013/22; F03B-003/00; F03B-003/18	CN102705147-A 03 Oct 2012 F03B-013/22 201315 Pages: 7 Chinese	CN102705147-A CN10180827 04 Jun 2012	CN10180827 04 Jun 2012	DIIDW:2013A72722
167	P	US4333311-A	Wave energy converting device - comprises rotary shaft, hollow sleeve and several partition walls to produce number of compartments.	KITABAYASH S	KITABAYASHI S (KITA-Individual)	1982H5361E	The wave energy converting device is disposed on the wave in the sea comprises a rotary shaft. A rotary hollow sleeve containing the rotary shaft of several partition walls for partitioning the hollow sleeve into compartments, several radial plates each secured to the rotary shaft and rotary sleeve to form water chambers.	Q55 (Positive displacement fluid machines/pumps/compressors (i.e. for driving fluid) (F04B,C)); X15 (Non-Fossil Fuel Power Generating Systems)	X15-C	F03B-013/12	US4333311-A 08 Jun 1982 F03B-013/12 198225 Pages: 7 English	US4333311-A US083793 11 Oct 1979	JP079849 25 Jun 1979	DIIDW:1982H5361E
168	P	FR2436070-A	Sea wave energy converter - uses semi-submerged hollow toroidal vessel contg. e.g. rotatable wheel driving electric generator.		RINALDI V (RINA-Individual)	1980F6460C	The sea wave energy converter comprises a large, hollow toroidal vessel which is semi-submerged, and either anchored directly to the sea bed, or attached to an arm. Various methods are used to convert the kinetic energy to electrical energy, one employing a hydrodynamic magneto.	Q24 (Ships; waterborne vessels; related equipment (B63)); Q55 (Positive displacement fluid machines/pumps/compressors (i.e. for driving fluid) (F04B,C)); X15 (Non-Fossil Fuel Power Generating Systems)	X15-C	B63B-035/44; B63B-021/50; F03B-013/12	FR2436070-A 16 May 1980 B63B-035/44 198026 French		FR019856 30 Jun 1976	DIIDW:1980F6460C
169	P	CN102562422-A	Sea wave energy converting method, involves generating mechanical energy by driving water turbine, and arranging wave energy conversion device with water outlet of water pipe in parallel to convert mechanical energy.	SUN Y	SUN Y (SUNY-Individual)	2012K68255	NOVELTY - The method involves generating pressure by a press cover (2) due to water flow. A water turbine (3), a blade (4) and a driven rotating shaft (5) are rotated by generated pressure of the press cover. Mechanical energy is generated by driving the water turbine. A water pipe (6) is utilized to release water from the water turbine after driven process. The press cover and the water pipe are…	Q54 (Non-positive displacement fluid engines (i.e. driven by fluid); Miscellaneous motors and machines for producing mechanical power/thrust (F03B,D,G,H)); X15 (Non-Fossil Fuel Power Generating Systems)	X15-C01	F03B-013/14	CN102562422-A 11 Jul 2012 F03B-013/14 201279 Pages: 5 Chinese	CN102562422-A CN10612459 24 Dec 2010	CN10612459 24 Dec 2010	DIIDW:2012K68255
170	P	US2020284237-A1; US11204014-B2	Wave energy converter for powering devices e.g. aids to navigation for aquaculture, has power generator which is configured to tilt in horizontal axis perpendicular to longitudinal axis where tilt results in conversion of kinetic energy.	FOUQUET J E	FOUQUET J E (FOUQ-Individual)	2020879417	NOVELTY - The wave energy converter (200) has power generator characterized by an axial length along longitudinal axis. The power generator is configured to tilt about horizontal axis perpendicular to the longitudinal axis in which tilt results in a conversion of kinetic energy present in a group of water waves causes the tilt to electrical energy. The axial length is less than approximately one …	Q54 (Non-positive displacement fluid engines (i.e. driven by fluid); Miscellaneous motors and machines for producing mechanical power/thrust (F03B,D,G,H)); X15 (Non-Fossil Fuel Power Generating Systems)	Q54-X; X15-C01	F03B-013/20	US2020284237-A1 10 Sep 2020 F03B-013/20 202076 Pages: 38 English	US2020284237-A1 US806099 02 Mar 2020	US813873P 05 Mar 2019	DIIDW:2020879417
171	P	NO330490-B1; NO200903313-A	Wave energy converting method.	NESHEIM A	NESHEIM A (NESH-Individual)	2011E83687		Q54 (Non-positive displacement fluid engines (i.e. driven by fluid); Miscellaneous motors and machines for producing mechanical power/thrust (F03B,D,G,H)); X15 (Non-Fossil Fuel Power Generating Systems)	X15-C01	F03B-013/18	NO330490-B1 02 May 2011 F03B-013/18 201135 Pages: 1 Portuguese	NO330490-B1 NO003313 10 Nov 2009	NO003313 10 Nov 2009	DIIDW:2011E83687
172	P	WO2021186177-A1	Hinged raft for wave energy conversion device (WEC), has first and second bodies that are folded back to form elongate object having hinge joint at one end when raft is in folded configuration.	MCNATT J C	MOCEAN ENERGY LTD (MOCE-Non-standard)	2021B5854E	NOVELTY - The raft (1) has two elongate buoyant bodies connected by a hinge joint for rotation of the bodies relative to each other about an axis, where the raft has a folded configuration and an open configuration. The bodies are folded back to form an elongate object having the hinge (6) joint at one end, when the raft is in the folded configuration. A range of rotation of bodies via the joint …	Q54 (Non-positive displacement fluid engines (i.e. driven by fluid); Miscellaneous motors and machines for producing mechanical power/thrust (F03B,D,G,H)); X15 (Non-Fossil Fuel Power Generating Systems)	Q54-X; X15-C01	F03B-013/20	WO2021186177-A1 23 Sep 2021 202184 Pages: 38 English	WO2021186177-A1 WOGB050670 17 Mar 2021	GB003937 18 Mar 2020	DIIDW:2021B5854E
173	P	WO2016195600-A1; SG11201708101-A1; SG11201708101-B	Wave energy converter for converting wave energy to electricity across high and low wave height conditions for small scale power generation in e.g. jetties, has generator for converting rotational motion of roller into electricity.	ABUNDO M L S	UNIV NANYANG TECHNOLOGICAL (UYTU-C)	2016765460	NOVELTY - The converter (10) has a roller (30) connected to a floating structure (100) on water having surface waves. The roller rolls against a guide (200) to which the floating structure is coupled, where relative motion between the guide and the floating structure caused by the surface waves results in rotational motion of the roller. A generator converts the rotational motion of the roller in…	Q54 (Non-positive displacement fluid engines (i.e. driven by fluid); Miscellaneous motors and machines for producing mechanical power/thrust (F03B,D,G,H)); X11 (Power Generation and High Power Machines); X15 (Non-Fossil Fuel Power Generating Systems)	Q54-X; X11-B; X11-U05; X15-C01	F03B-013/18	WO2016195600-A1 08 Dec 2016 F03B-013/18 201683 Pages: 31 English	WO2016195600-A1 WOSG050261 03 Jun 2016	SG10004426 05 Jun 2015	DIIDW:2016765460
174	P	US2018073482-A1; WO2018125318-A2; WO2018125318-A9; AU2017385006-A1; WO2018125318-A3; US10473083-B2; ZA201902186-A; AU2022209252-A1; AU2017385006-B2; NZ752276-A2	Inertial wave energy converter for a hydraulic motor of vessel, comprises a positively buoyant flotation module that floats on the surface of the water, where the first pulley is positioned with the positively buoyant flotation module.	SHELDON-COULSON G A	SHELDON-COULSON G A (SHEL-Individual)	2018211430	NOVELTY - The inertial wave energy converter comprises a positively buoyant flotation module that floats on the surface of the water. A pulley (132) is positioned with the positively buoyant flotation module. A power-take-off system resists the rotation of the pulley. A submerged negatively buoyant mass is coupled to he positively buoyant flotation module at the pulley using a flexible connector.…	Q54 (Non-positive displacement fluid engines (i.e. driven by fluid); Miscellaneous motors and machines for producing mechanical power/thrust (F03B,D,G,H)); X11 (Power Generation and High Power Machines); X15 (Non-Fossil Fuel Power Generating Systems)	Q54-X; X11-B01; X11-J05B; X15-C01	F03B-013/14; F03B-013/22; H02K-007/18; F03B-013/20; F16H-019/06; F03B-013/00; F03B-013/10; F03B-013/12; F03B-013/16; F03B-013/18; F03B-013/26; F16H-039/00; F16H-041/00; H02K-003/52; F03B-000/00; F16H-000/00; G05D-001/00; H02J-004/00	US2018073482-A1 15 Mar 2018 F03B-013/14 201820 Pages: 246 English	US2018073482-A1 US700118 09 Sep 2017	US393056P 11 Sep 2016	DIIDW:2018211430
175	P	CN106194562-A	Mechanical raft-type wave energy converting device, has one-way bearing fixed on shaft, speed increasing planetary gear train and generator, and clockwork spring box whose output end is connected with input end of generator.	YAO L	UNIV FUZHOU (UFZU-C)	2016788186	NOVELTY - The device has multiple cylindrical floating bodies connected together by a movable hinge. The movable hinge is equipped with a power take-off (PTO) module. The PTO module is provided with an energy conversion unit that is fixed with a shaft. The shaft is mounted on a cylindrical body. A one-way bearing is fixed with the shaft, a speed increasing planetary gear train and a generator. An…	Q54 (Non-positive displacement fluid engines (i.e. driven by fluid); Miscellaneous motors and machines for producing mechanical power/thrust (F03B,D,G,H)); X15 (Non-Fossil Fuel Power Generating Systems)	Q54-X; X15-C01	F03B-011/00; F03B-013/14	CN106194562-A 07 Dec 2016 F03B-013/14 201703 Pages: 7 Chinese	CN106194562-A CN10819263 13 Sep 2016	CN10819263 13 Sep 2016	DIIDW:2016788186
176	P	CN107435614-A	Ocean wave energy conversion device, has annular guide rail connected with tide level converting component through locating column, and floating platform main body whose wave facing surface is provided with wave energy converter.	MENG F	MENG F (MENG-Individual)	201785451P	NOVELTY - The device has multiple floating combination modules connected together to form a floating platform main body (1). A front end of the floating platform main body is provided with a locating column (3) and fixed on an offshore base. A tide energy converter (8) is provided with a wave energy converter (9) and uniformly distributed locating teeth (6). An annular guide rail (4) is connected…	Q54 (Non-positive displacement fluid engines (i.e. driven by fluid); Miscellaneous motors and machines for producing mechanical power/thrust (F03B,D,G,H)); X15 (Non-Fossil Fuel Power Generating Systems)	Q54-X; X15-C01A1; X15-C01B2; X15-C02	F03B-013/20; F03B-013/26	CN107435614-A 05 Dec 2017 F03B-013/26 201802 Pages: 11 Chinese	CN107435614-A CN11011102 17 Nov 2016	CN11011102 17 Nov 2016	DIIDW:201785451P
177	P	CN114087112-A; CN114087112-B	Auxiliary stable conversion mechanism integrated floating wave energy conversion device, has vertical mounting bracket respectively connected with transverse mounting bracket and angle steel ring at same side.	DING S	UNIV DALIAN MARITIME (UYDM-C)	202236294Y	NOVELTY - The device has a cone-shaped cylinder cover (8) fixed on two ends of a floating cylinder. An upper gear conversion mechanism (13) is fixed on an upper portion of a side of a buoy body. A lower gear conversion mechanism (14) is fixed on a lower portion of another side of the buoy body. Three auxiliary mechanisms (15-17) at same side are connected by a belt seat fastening ring (10) and a …	Q54 (Non-positive displacement fluid engines (i.e. driven by fluid); Miscellaneous motors and machines for producing mechanical power/thrust (F03B,D,G,H)); X15 (Non-Fossil Fuel Power Generating Systems)	Q54-X; X15-C01	F03B-013/18	CN114087112-A 25 Feb 2022 F03B-013/18 202226 Chinese	CN114087112-A CN11416050 25 Nov 2021	CN11416050 25 Nov 2021	DIIDW:202236294Y
178	P	GB2530011-A; GB2530011-B	Wave energy conversion device to convert energy to produce useful work, has adjustable buoyancy device which contains mixture of gas and liquid and has roof with concave interior profile located below waterline of device.	PAWSEY C J	PAWSEY C J (PAWS-Individual)	2016160776	NOVELTY - The device (2) has an adjustable buoyancy device (22) arranged to provide an adjustable centre of gravity for activating an antiphase pitching of the device. A flow channel defined by side walls (4) and bottom wall has a sloped portion (6). The adjustable buoyancy device has a roof located below waterline (12) of the device. The roof has concave interior profile and the adjustable buoya…	Q54 (Non-positive displacement fluid engines (i.e. driven by fluid); Miscellaneous motors and machines for producing mechanical power/thrust (F03B,D,G,H)); X15 (Non-Fossil Fuel Power Generating Systems)	Q54-X; X15-C01	F03B-013/14	GB2530011-A 16 Mar 2016 F03B-013/14 201620 Pages: 21 English	GB2530011-A GB013654 01 Aug 2014	GB013654 01 Aug 2014	DIIDW:2016160776
179	P	CN110118150-A; CN210049985-U	Buoyancy pendulum and oscillating buoy type wave energy conversion device, has hydraulic cylinder hinged on hanging floating body, columnar cylinder provided with stator iron core, and winding coil for generating induction current.	WANG J	UNIV EAST CHINA JIAOTONG (UYEJ-C)	201971554R	NOVELTY - The device has a hydraulic system orderly connected with a hydraulic cylinder, a hydraulic control system. An electricity generating system is provided with a columnar cylinder and a transmission rod. The columnar cylinder is made of non-magnetic metal material. A hydraulic motor is connected with a hydraulic generator. The hydraulic cylinder is hinged on an upper surface of a hanging f…	Q54 (Non-positive displacement fluid engines (i.e. driven by fluid); Miscellaneous motors and machines for producing mechanical power/thrust (F03B,D,G,H)); V06 (Electromechanical Transducers and Small Machines); X11 (Power Generation and High Power Machines); X15 (Non-Fossil Fuel Power Generating Systems)	Q54-X; V06-M07A; V06-M10; X11-B01; X11-J01A; X11-J02; X11-J05B; X15-C01A1	F03B-013/18; H02K-007/18	CN110118150-A 13 Aug 2019 F03B-013/18 201971 Pages: 10 Chinese	CN110118150-A CN10470879 31 May 2019	CN10470879 31 May 2019	DIIDW:201971554R
180	P	KR1395912-B1	Marine wave energy converter, has elevating shaft equipped with elastic unit, first delivered pulley arranged in support panel, motive pulley connected with transmission gear, and second delivered pulley equipped with belt.	SEOK K G	POWER ENG CO LTD (POWE-Non-standard)	2014K84303	NOVELTY - The converter has a guide rail fixed in a cabinet. A rack portion is installed between a closing-panel and the cabinet. An elevating shaft is equipped with an elastic unit. The elevating shaft is arranged in an inner side of a case. A driving pulley delivers rotary motion of a sliding gear to a power transmission part. A first delivered pulley is arranged in a support panel. A motive pu…	Q54 (Non-positive displacement fluid engines (i.e. driven by fluid); Miscellaneous motors and machines for producing mechanical power/thrust (F03B,D,G,H)); X15 (Non-Fossil Fuel Power Generating Systems)	X15-C01	F03B-013/10; F03B-013/14; F03B-013/16	KR1395912-B1 27 May 2014 F03B-013/14 201444 Pages: 10	KR1395912-B1 KR138635 14 Nov 2013	KR138635 14 Nov 2013	DIIDW:2014K84303
181	P	US2005099010-A1; US7199481-B2	Wave-energy converter for submarine, has inductive coil connected to axle that is inserted into opening of magnetic sleeve and connected to base contacting sea-water level, and buoyant collar float.	HIRSCH W W	HIRSCH W W (HIRS-Individual)	2005402091	NOVELTY - The converter (100) has an inductive coil (114) connected to axle (102) that is inserted into opening of magnetic sleeve (112) and connected to base contacting sea-water level (104), such that the coil axis is parallel to the axle. Buoyant collar float (106) is attached to the axle and to magnetic sleeve. Displacement of the float due to wave, causes the sleeve to move relative to coil …	Q55 (Positive displacement fluid machines/pumps/compressors (i.e. for driving fluid) (F04B,C)); W06 (Aviation, Marine and Radar Systems); X13 (Switchgear, Protection, Electric Drives); X15 (Non-Fossil Fuel Power Generating Systems)	W06-C01C3; X13-C04D; X13-G02X; X15-C01	H02P-009/04; F03B-013/10; F03B-013/12	US2005099010-A1 12 May 2005 H02P-009/04 200541 Pages: 23 English	US2005099010-A1 US703952 07 Nov 2003	US703952 07 Nov 2003	DIIDW:2005402091
182	P	AU2021103827-A4	Ocean wave energy converter has attainable power take-off systems that are followed by thought of number of management methods to reinforce potency of absorber-type WECs so as to extract the energy from waves.	SAHOO S	SAHOO S (SAHO-Individual)	202247265P	NOVELTY - The converter extends the extraction of energy from waves. The analysis during space is driven by the necessity to satisfy renewable energy targets. The overall standing of wave energy is introduced, and the device varieties that represent current wave energy device (WEC) technology is evaluated. The attainable power take-off systems are followed by a thought of a number of the manageme…	Q54 (Non-positive displacement fluid engines (i.e. driven by fluid); Miscellaneous motors and machines for producing mechanical power/thrust (F03B,D,G,H)); X15 (Non-Fossil Fuel Power Generating Systems)	Q54-X; X15-C01C	F03B-013/18	AU2021103827-A4 31 Mar 2022 F03B-013/18 202230 Pages: 12 English	AU2021103827-A4 AU103827 02 Jul 2021	AU103827 02 Jul 2021	DIIDW:202247265P
183	P	CN104929856-A; CN104929856-B	Link energy storage operating wave energy conversion system, has hydraulic cylinder filled with hydraulic oil, input shaft and output shaft connected with hydraulic pressure motor, and back oil part whose lower end is provided with oil tank.	SHENG S	GUANGZHOU ENERGY INST CONVERSION CHINESE (CAEC-C)	201566672C	NOVELTY - The system has a hydraulic cylinder filled with hydraulic oil. A main body is provided with a pre-charging high pressure gas energy accumulator, an autonomous hydraulic pressure controller, a hydraulic motor and a hydraulic pressure device. An upper end of a sealing oil tank is connected with an air bottle through a gas pipe. A lower end of the sealing oil tank is provided with a pressu…	Q54 (Non-positive displacement fluid engines (i.e. driven by fluid); Miscellaneous motors and machines for producing mechanical power/thrust (F03B,D,G,H)); X15 (Non-Fossil Fuel Power Generating Systems)	X15-C01	F03B-013/22	CN104929856-A 23 Sep 2015 F03B-013/22 201573 Pages: 9 Chinese	CN104929856-A CN10198464 23 Apr 2015	CN10198464 23 Apr 2015	DIIDW:201566672C
184	P	GB2488185-A; GB2488185-B	Free floating bellows wave energy converter has connection unit that is furnished with energy conversion unit driven by gas flowing between vessels.	FARLEY F J M	FARLEY F J M (FARL-Individual)	2012K98450	NOVELTY - The converter has multiple air tight vessels that are interconnected by connection unit and are filled with air or gas under pressure. A main vessel (1) is included with flexible walls and is ballasted to float freely in sea without other support. The auxiliary vessels (10) are located above sea level. A connection unit (8) is furnished with energy conversion unit driven by gas flowing …	Q54 (Non-positive displacement fluid engines (i.e. driven by fluid); Miscellaneous motors and machines for producing mechanical power/thrust (F03B,D,G,H)); X15 (Non-Fossil Fuel Power Generating Systems)	X15-C01	F03B-013/18; F03B-013/24	GB2488185-A 22 Aug 2012 F03B-013/24 201256 Pages: 10 English	GB2488185-A GB007631 09 May 2011	GB002910 21 Feb 2011	DIIDW:2012K98450
185	P	BR8205435-A	Sea wave energy conversion system.		BRUCH H (BRUC-Individual)	1984152465		Q55 (Positive displacement fluid machines/pumps/compressors (i.e. for driving fluid) (F04B,C)); X15 (Non-Fossil Fuel Power Generating Systems)	X15-C01	F03G-007/00	BR8205435-A 02 May 1984 198425 Pages: 8		BR005435 16 Sep 1982	DIIDW:1984152465
186	P	CN115303459-A	Self-powered underwater bionic robot i.e. bionic ray fish underwater robot, has control module, wave energy conversion device and gravity adjusting device that are installed in machine body cabin body, where control module controls pectoral fin movement.	ZHAO X	UNIV SHANGHAI JIAOTONG (USJT-C)	2022E2353N	NOVELTY - The robot has a pectoral fin fluctuation mechanism, a pectoral fin folding mechanism, a machine body, a wave energy conversion device, a gravity adjusting device, a storage battery and a control module. A pectoral fin is hinged with the machine body through a pectoral fin rotating shaft. The control module controls the movement of the pectoral fin. The wave energy converting device gene…	W06 (Aviation, Marine and Radar Systems); X15 (Non-Fossil Fuel Power Generating Systems)	W06-C15B; W06-C09; X15-C01; X15-C03	B63C-011/52; B63G-008/00; B63G-008/08; B63G-008/14; B63H-001/37; F03B-013/20	CN115303459-A 08 Nov 2022 B63H-001/37 202201 Chinese	CN115303459-A CN11099125 07 Sep 2022	CN11099125 07 Sep 2022	DIIDW:2022E2353N
187	P	WO2017100582-A1; CA3008148-A1; US2019010915-A1; US11156200-B2; CA3008148-C	System for performing wave energy conversion to drive turbine for producing electricity, has flexible component and ballast combination providing weak drag force when flexible component and ballast combination sinks in water column.	MACDONALD D G	UNIV MASSACHUSETTS (UMAC-C)	2017399501	NOVELTY - The system has a flexible component and ballast combination (25) comprising a ballast subsystem (45). A flexible linear component (35) is extended from a point absorber wave energy converter (15) to the ballast subsystem and operatively connected at an end to the ballast subsystem and at another end to the point absorber wave energy converter. The flexible component and ballast combinat…	Q54 (Non-positive displacement fluid engines (i.e. driven by fluid); Miscellaneous motors and machines for producing mechanical power/thrust (F03B,D,G,H)); X15 (Non-Fossil Fuel Power Generating Systems)	Q54-X; X15-C01A1	F03B-013/10; F03B-013/12; F03B-013/14; F03B-013/16; F03B-013/20	WO2017100582-A1 15 Jun 2017 F03B-013/10 201742 Pages: 48 English	WO2017100582-A1 WOUS065840 09 Dec 2016	US266217P 11 Dec 2015	DIIDW:2017399501
188	P	US2021246863-A1; US11448180-B2	Positively buoyant wave energy converter for utilizing flotation module to rise and fall with passage of waves, includes water conducting tube that has constriction for accelerating water, and generator is arranging in interior.	SHELDON-COULSON G A	LONE GULL HOLDINGS LTD (LONE-Non-standard)	202193167Y	NOVELTY - The positively buoyant wave energy converter includes a water conducting tube that has constriction for accelerating water. A flotation module is rigidly connected to the water conducting tube and a horizontal cross-sectional area larger than a largest cross-sectional area of the water conducting tube. A submerged pod defining an interior volume with a non-corrosive environment. A water…	Q54 (Non-positive displacement fluid engines (i.e. driven by fluid); Miscellaneous motors and machines for producing mechanical power/thrust (F03B,D,G,H)); X15 (Non-Fossil Fuel Power Generating Systems)	Q54-X; X15-C01A1	F03B-011/02; F03B-013/10; F03B-013/18; F03B-013/22	US2021246863-A1 12 Aug 2021 F03B-013/22 202168 English	US2021246863-A1 US231776 15 Apr 2021	US377679P 22 Aug 2016	DIIDW:202193167Y
189	P	CN111535986-A; CN111535986-B	Wave energy converter control system, has high pressure energy accumulator corrugated with pipe type energy accumulators, main hydraulic cylinder and auxiliary hydraulic cylinder connected to double-cavity direct-acting hydraulic cylinders.	WEN H	UNIV XIHUA (UYXH-C)	202080662Q	NOVELTY - The system has an auxiliary hydraulic cylinder (1b) whose upper oil cavity is connected with a first oil path. A lower oil cavity of the auxiliary hydraulic cylinder is connected with a second oil path. A first oil path is connected with a liquid control one-way valve (8b). The second oil path is connected with a liquid control one-way valve (9b). A pair of overflow flushing valves (3b)…	Q54 (Non-positive displacement fluid engines (i.e. driven by fluid); Miscellaneous motors and machines for producing mechanical power/thrust (F03B,D,G,H)); X15 (Non-Fossil Fuel Power Generating Systems)	Q54-X; X15-C01; X15-C03	F03B-013/16; F03B-015/00	CN111535986-A 14 Aug 2020 F03B-015/00 202069 Pages: 10 Chinese	CN111535986-A CN10395717 12 May 2020	CN10395717 12 May 2020	DIIDW:202080662Q
190	P	US2019195188-A1; US10337488-B1	Wave energy converter deep sea mounting system, has stationary input pulley torsionally and mechanically coupled to generator output pulley through pulley system, where generator output pulley is rotatably coupled to electrical generator.	HEIM J J	HEIM J J (HEIM-Individual)	201953576J	NOVELTY - The system has a wave energy converter (WEC) mechanism and an electrical generator (8) positioned within an enclosure (3), where the wave energy converter mechanism comprises a stationary input pulley, a pulley system and a generator output pulley, and each of the pulley system comprises a large input pulley (74) and a small output pulley (75). The large input pulley is torsionally coup…	W06 (Aviation, Marine and Radar Systems); X15 (Non-Fossil Fuel Power Generating Systems)	W06-C01; W06-C15G; X15-C01	B63B-035/44; F03B-013/18; F16H-031/00; B63B-021/50; B63B-039/06; F16F-015/30	US2019195188-A1 27 Jun 2019 F03B-013/18 201949 Pages: 16 English	US2019195188-A1 US851400 21 Dec 2017	US851400 21 Dec 2017	DIIDW:201953576J
191	P	GB2465642-A; GB2465642-B; WO2010130518-A2; WO2010130821-A2; IE85792-B; WO2010130518-A3; WO2010130821-A3; EP2430729-A2; US2012139261-A1	Wave energy conversion system for use in off-shore distributed electrical network, has control unit co-operable with sensor for controlling mode of mechanical energy converter in response to sensed operating characteristic of absorber.	DICK W	WAVEBOB LTD (WAVE-Non-standard)	2010G01847	NOVELTY - The system (100) has a wave energy absorber (105) for absorbing wave energy. A mechanical energy converter (102) e.g. linear switch reluctance generator, is driven by the absorber for converting mechanical energy to electrical energy. The converter provides a generating mode for providing power to an electrical grid e.g. on-shore grid, and a motoring mode for extracting power from the e…	Q54 (Non-positive displacement fluid engines (i.e. driven by fluid); Miscellaneous motors and machines for producing mechanical power/thrust (F03B,D,G,H)); X15 (Non-Fossil Fuel Power Generating Systems)	X15-C01B1; X15-C01B2; X15-C03	F03B-013/20; H02K-007/18; F03B-013/00; H02J-003/38; H02K-035/00; F03B-013/16; H02K-007/116	GB2465642-A 02 Jun 2010 F03B-013/20 201037 Pages: 34 English	GB2465642-A GB008197 13 May 2009	GB008197 13 May 2009	DIIDW:2010G01847
192	P	CN102678431-A; CN102678431-B	Wave energy conversion system, has switch device provided with hydraulic cylinder that is connected with hydraulic motor and multiple floating plates, where hydraulic motor drives generating unit for generating electricity.	PAN E	LANGNENG ELECTRICTY RES CO LTD (LANG-Non-standard)	2012Q59292	NOVELTY - The system has a collecting device connected with a switch device for collecting wave energy. The switch device is connected with a generating unit. The collecting device is provided with multiple floating plates and a machine frame. Each floating plate is hinged with an end of the machine frame and connected with the switch device. The switch device is provided with a hydraulic cylinde…	Q54 (Non-positive displacement fluid engines (i.e. driven by fluid); Miscellaneous motors and machines for producing mechanical power/thrust (F03B,D,G,H)); Q57 (Fluid-pressure actuators; hydraulic/pneumatics in general (F15)); X15 (Non-Fossil Fuel Power Generating Systems)	X15-C01	F03B-013/14; F03B-013/22; F15B-003/00	CN102678431-A 19 Sep 2012 F03B-013/14 201309 Pages: 21 Chinese	CN102678431-A CN10185736 06 Jun 2012	CN10185736 06 Jun 2012	DIIDW:2012Q59292
193	P	ES2429593-A2	Wave energy converter for use with oscillating water column-different pressure storage tanks, has air turbine working with constant pressure drop and determining difference between pressure in chamber of column and atmospheric pressure.	BORRAS FORMOSO R	UNIV CORUNA (UYCO-Non-standard)	2013X18126	NOVELTY - The converter has an electric generator (10) coupled to an air turbine (8). The generator generates air pressure in a chamber of an oscillating water column during upward/downward stroke of a water level. The air turbine works with constant pressure drop and determines selected pressure difference between pressure in the chamber of the water column and atmospheric pressure. An air outle…	X15 (Non-Fossil Fuel Power Generating Systems)	X15-C01A9	F01B-023/10	ES2429593-A2 15 Nov 2013 F01B-023/10 201404 Pages: 18 Spanish	ES2429593-A2 ES030530 10 Apr 2012	ES030530 10 Apr 2012	DIIDW:2013X18126
194	P	US2018163690-A1; US10344736-B2	Multi-resonant multiple degree-of-freedom wave energy converter, has predictor that is configured to predict excitation force of wave impacting buoy in surge and pitch directions in future time horizon.	ABDELKHALIK O	ABDELKHALIK O (ABDE-Individual)	2018466821	NOVELTY - The converter (100) has a heave controller (114) that causes the power take-off (110) to apply a force to the buoy (102). A predictor (120) is configured to predict the excitation force of the wave impacting the buoy in the surge and pitch directions in a future time horizon in which the control forces in the surge and pitch directions are optimized using a pseudo-spectral control metho…	Q54 (Non-positive displacement fluid engines (i.e. driven by fluid); Miscellaneous motors and machines for producing mechanical power/thrust (F03B,D,G,H)); T01 (Digital Computers); X15 (Non-Fossil Fuel Power Generating Systems)	Q54-X; T01-J04B2; T01-J17; X15-C01; X15-C03	F03B-013/18; F03B-015/20; G02F-001/39; G06F-001/02; H01J-049/42; F03B-013/10; F03B-013/12; F03B-013/16; F03B-015/00	US2018163690-A1 14 Jun 2018 F03B-013/18 201842 Pages: 30 English	US2018163690-A1 US837853 11 Dec 2017	US432427P 09 Dec 2016	DIIDW:2018466821
195	P	CN110185572-A	Wheat spike-shaped roller-type ocean wave energy conversion device, has main frame for loading other devices, and float that transmits wave energy through liquid piston to multi-claw ratchet wheel in form of piston push rod motion.	YU Z	YU Z (YUZZ-Individual)	201977993Q	NOVELTY - The device has a main frame for loading other devices. A float transmits wave energy through a liquid piston to a multi-claw ratchet wheel in a form of piston push rod motion.	Q54 (Non-positive displacement fluid engines (i.e. driven by fluid); Miscellaneous motors and machines for producing mechanical power/thrust (F03B,D,G,H)); X15 (Non-Fossil Fuel Power Generating Systems)	Q54-X; X15-C01	F03B-013/18	CN110185572-A 30 Aug 2019 F03B-013/18 201975 Pages: 5 Chinese	CN110185572-A CN10173692 03 Mar 2019	CN10173692 03 Mar 2019	DIIDW:201977993Q
196	P	WO2024043785-A1	Wave energy converter power plant for extracting energy from waves to renewable electricity generation, has adjustment system is provide for the submerged wing profile to position submerged wing profile in set position relative to still water line.	NYGARD J V	WAVE ADAPT AS (WAVE-Non-standard)	202423909J	NOVELTY - The plant (P) has a submerged wing profile (2) that is directly or indirectly connected to the stationary structure, where the profile is configured for moving relative to the stationary structure. A generator system, a control and elevation adjustment system is provided for the stationary structure to position the structure in a set position. An adjustment system is provide for the sub…	Q54 (Non-positive displacement fluid engines (i.e. driven by fluid); Miscellaneous motors and machines for producing mechanical power/thrust (F03B,D,G,H)); X11 (Power Generation and High Power Machines); X15 (Non-Fossil Fuel Power Generating Systems)	Q54-X; X11-B; X15-C01	F03B-013/18	WO2024043785-A1 29 Feb 2024 F03B-013/18 202421 Pages: 50 English	WO2024043785-A1 WONO060033 18 Aug 2023	NO000892 22 Aug 2022	DIIDW:202423909J
197	P	US2018163691-A1; US10415537-B2	Multi-resonant multi-degree-of-freedom wave energy converter, has heave controller for causing power take-off unit to apply force to buoy to put buoy heave motion in resonance with wave excitation force in heave direction.	ABDELKHALIK O	ABDELKHALIK O (ABDE-Individual)	2018466820	NOVELTY - The converter (100) has a power take-off unit (110) applying control forces in heave, surge, and pitch directions to a buoy (102) and harvesting mechanical energy of a buoy motion. A heave controller causes the power take-off unit to apply force to the buoy to put buoy heave motion in resonance with wave excitation force in heave direction. A predictor (120) predicts the excitation forc…	Q54 (Non-positive displacement fluid engines (i.e. driven by fluid); Miscellaneous motors and machines for producing mechanical power/thrust (F03B,D,G,H)); T01 (Digital Computers); X15 (Non-Fossil Fuel Power Generating Systems)	Q54-X; T01-J17; X15-C01C; X15-C03	F03B-013/18; F03B-015/00; G06F-001/02; F03B-013/10; F03B-013/12; F03B-013/16	US2018163691-A1 14 Jun 2018 F03B-013/18 201840 Pages: 34 English	US2018163691-A1 US837885 11 Dec 2017	US432417P 09 Dec 2016	DIIDW:2018466820
198	P	US2015013325-A1	Pod i.e. flotation device, for use in wave energy converter system in shallow water area of sea, has sliding track that varies from engaged and disengaged states, where disengaged state allows ball connector on track to shift forward.	DEHLSEN J G P	DEHLSEN ASSOC LLC (DEHL-Non-standard)	201505911X	NOVELTY - The pod (120A) has a ball connector and a sliding track mounted on two opposite ends of the pod. The ball connector and the sliding track permit the pod to pitch within a predetermined arc that is ninety degree. The sliding track varies from an engaged state and a disengaged state, where the disengaged state allows the ball connector on the sliding track to shift forward and allow the p…	Q54 (Non-positive displacement fluid engines (i.e. driven by fluid); Miscellaneous motors and machines for producing mechanical power/thrust (F03B,D,G,H)); X15 (Non-Fossil Fuel Power Generating Systems)	X15-C01	F03B-013/18	US2015013325-A1 15 Jan 2015 F03B-013/18 201507 Pages: 16 English	US2015013325-A1 US316513 26 Jun 2014	US841931 15 Mar 2013	DIIDW:201505911X
199	P	WO2009137884-A1; AU2009246060-A1; US2011068579-A1; EP2313646-A1; US8536724-B2; BR200912623-A2; EP2313646-A4	Ocean-wave energy converter for generating electric power from ocean waves, has float attached to two guidance arms spaced apart at interval different for each float, such that arms of one float cannot interfere with arms of another float.	GLEN D	PERPETUWAVE POWER PTY LTD (PERP-Non-standard)	2009R44062	NOVELTY - The converter includes a structure (5) supported above the water and having a stabilizing unit e.g. pontoons (6). An array of independently-guided long floats (1) are suspended from the structure through guidance arms (2) that pivot when a wave (11) acts on the long floats. The length of the floats is more than 250% of the width of the floats. Each float is attached to two guidance arms…	Q54 (Non-positive displacement fluid engines (i.e. driven by fluid); Miscellaneous motors and machines for producing mechanical power/thrust (F03B,D,G,H)); X11 (Power Generation and High Power Machines); X15 (Non-Fossil Fuel Power Generating Systems)	X11-B; X15-C01	F03B-013/14; F03B-013/18; F03B-013/10; F03B-013/12; H02P-009/04; F03B-013/20	WO2009137884-A1 19 Nov 2009 F03B-013/14 200978 Pages: 26 English	WO2009137884-A1 WOAU000611 15 May 2009	AU902409 15 May 2008	DIIDW:2009R44062
200	P	CN102734052-A; CN102734052-B	Anti-storm shock wave power device, has hydraulic oil cylinder and piston rod connected with support platform and wave energy conversion cylinder, and guide post whose top part is fixedly connected with column body.	BAI X	UNIV ZHEJIANG OCEAN (UYZO-C)	2012R60739	NOVELTY - The device has a small hydraulic motor generating device (6) generating power generation wave. A hydraulic oil cylinder (5) and a piston rod are respectively connected with a support platform (3) and a wave energy conversion cylinder (1). Top part of a guide post (2) and the supporting platform are fixedly connected with a column body. A large hydraulic motor (4) is connected with a rod…	Q54 (Non-positive displacement fluid engines (i.e. driven by fluid); Miscellaneous motors and machines for producing mechanical power/thrust (F03B,D,G,H)); X11 (Power Generation and High Power Machines); X15 (Non-Fossil Fuel Power Generating Systems)	X11-B; X15-C01	F03B-013/22	CN102734052-A 17 Oct 2012 F03B-013/22 201316 Pages: 5 Chinese	CN102734052-A CN10098567 14 Apr 2011	CN10098567 14 Apr 2011	DIIDW:2012R60739
201	P	WO2009153329-A2; WO2009153329-A3; EP2315936-A2; US2012096846-A1	Wave energy conversion system, has control unit for selectively activating actuators to provide desired power take off damping characteristic in response to sensed parameter of wave absorber.	KALININ V	WAVEBOB LTD (WAVE-Non-standard)	2009S67139	NOVELTY - The system (100) has a power take off (PTO) comprising individually selectable actuators i.e. hydraulic pumps (120A-120C), where a wave absorber is coupled to the actuators for driving the actuators. A control unit (147) determines a desired PTO damping characteristic in response to a sensed parameter e.g. velocity, of the wave absorber. The control unit selectively activates the actuat…	Q54 (Non-positive displacement fluid engines (i.e. driven by fluid); Miscellaneous motors and machines for producing mechanical power/thrust (F03B,D,G,H)); X15 (Non-Fossil Fuel Power Generating Systems)	X15-C01C	F03B-013/18; F03B-013/20	WO2009153329-A2 23 Dec 2009 F03B-013/18 201002 Pages: 21 English	WO2009153329-A2 WOEP057638 18 Jun 2009	GB011280 19 Jun 2008	DIIDW:2009S67139
202	P	US2014265338-A1	Wave energy converter for use in water structure, has floating structure with cross section that has front panel connected at top edge to front end of top panel and is connected at bottom edge to front end of bottom panel.	BRETL J G	BRETL J G (BRET-Individual)	2014T41485	NOVELTY - The converter has a floating structure (10) that moves differentially relative to spar structure and has quadrilateral-like cross section with a front panel that has top and bottom edges for facing incoming waves, a top panel with front and back ends and is arranged parallel to still water surface, a bottom panel with front and back ends, and a back panel. The front panel is connected a…	Q54 (Non-positive displacement fluid engines (i.e. driven by fluid); Miscellaneous motors and machines for producing mechanical power/thrust (F03B,D,G,H)); X15 (Non-Fossil Fuel Power Generating Systems)	X15-C01	F03B-013/12	US2014265338-A1 18 Sep 2014 F03B-013/12 201469 Pages: 9 English	US2014265338-A1 US798022 12 Mar 2013	US798022 12 Mar 2013	DIIDW:2014T41485
203	P	US2007132246-A1; US7298054-B2	Wave energy conversion device for harnessing ocean wave energy has a floating doughnut-like wave-follower and a magnetic slider on a pole with integral induction coil to create electricity.	HIRSCH W W	HIRSCH W W (HIRS-Individual)	2007672631	NOVELTY - Central wave displacement axle (102) is welded vertically to a horizontal stabilization tidal platform base (206) which can be a pipe or grid of pipes. The axle has a hollow core with an inductive coil (114) that is electrically connected to transmission wires (118). Externally, this pole has a hollow doughnut-like buoyant collar (106) and a sliding hollow magnetic sleeve (112) tethered…	Q54 (Non-positive displacement fluid engines (i.e. driven by fluid); Miscellaneous motors and machines for producing mechanical power/thrust (F03B,D,G,H)); X15 (Non-Fossil Fuel Power Generating Systems); Q55 (Positive displacement fluid machines/pumps/compressors (i.e. for driving fluid) (F04B,C))	X15-C01	F03B-013/10; F03B-013/12; H02P-009/04	US2007132246-A1 14 Jun 2007 F03B-013/12 200763 Pages: 23 English	US2007132246-A1 US673631 12 Feb 2007	US703952 07 Nov 2003	DIIDW:2007672631
204	P	WO2016022315-A1; US2016252070-A1; US9458819-B2; EP3177825-A1; IN201717007491-A; ZA201701557-A	Wave energy converter for extracting energy from ocean wave, has upstream hydraulic cylinder configured to supply pressurized fluid to high-pressure manifold when upstream face of first piston moves toward upstream hydraulic cylinder.	WANNI A S	WANNI A S (WANN-Individual)	2016105889	NOVELTY - The wave energy converter has a first vessel (140) defining upstream opening (148U) and downstream opening (148D) on top surface of first vessel along longitudinal axis (143). An upstream opening sits below the crest of wave. A first piston (150) slidably secured and slides within first vessel parallel to longitudinal axis in reaction to differential water pressure acting between upstre…	Q54 (Non-positive displacement fluid engines (i.e. driven by fluid); Miscellaneous motors and machines for producing mechanical power/thrust (F03B,D,G,H)); X15 (Non-Fossil Fuel Power Generating Systems)	Q54-X; X15-C01	F03B-013/14; F03B-013/18; F03B-000/00	WO2016022315-A1 11 Feb 2016 F03B-013/14 201613 Pages: 41 English	WO2016022315-A1 WOUS042176 27 Jul 2015	US034241P 07 Aug 2014	DIIDW:2016105889
205	P	US9151268-B1; EP3051122-A1; EP3051122-B1	Wave energy convertor for use in floating power generating plant, has power assembly including pendulum assembly, where undulating motion of base from passing water waves causes pendulum assembly to oscillate such that rotor rolls.	FOULI H R	UNIV KING SAUD (UKSA-C)	201560216V	NOVELTY - The converter (10) has a power generating assembly (40) coupled to a support frame (30) and including a pendulum assembly rotatably mounted on a central axle (39). A dynamo is mounted on the pendulum assembly. A rotor of the dynamo frictionally engages an inner surface of an annular rail (36) to roll and generate current. Undulating motion of a buoyant base (20) from passing water waves…	A88 (Mechanical engineering and tools e.g. valves, gears and conveyor belts.); Q54 (Non-positive displacement fluid engines (i.e. driven by fluid); Miscellaneous motors and machines for producing mechanical power/thrust (F03B,D,G,H)); X11 (Power Generation and High Power Machines); X15 (Non-Fossil Fuel Power Generating Systems)	A12-H; X11-B01; X15-C01A1	F03B-013/10; F03B-013/12; F03B-013/20	US9151268-B1 06 Oct 2015 F03B-013/10 201569 Pages: 10 English	US9151268-B1 US607691 28 Jan 2015	US607691 28 Jan 2015	DIIDW:201560216V
206	P	EP2466118-A1; CN102705144-A	Power take off device for use in wave energy converters to extract power from ocean waves, has two fixation systems changing position of hydraulic cylinder that is connected to output mechanical transmission unit.	LASA AGUIRREBENGOA J	FUNDACION INASMET (INAS-Non-standard)	2012G83825	NOVELTY - The device (PTO) has two fixation systems changing a position of a hydraulic cylinder connected to an output mechanical transmission unit of an energy capture device (ECD) of a wave energy converter (WEC) by varying two distances, where one of the distances is a minimum distance between a pivoting axis of the unit and an end of the cylinder, and the other distance is the minimum distanc…	Q54 (Non-positive displacement fluid engines (i.e. driven by fluid); Miscellaneous motors and machines for producing mechanical power/thrust (F03B,D,G,H)); X15 (Non-Fossil Fuel Power Generating Systems)	X15-C01C	F03B-013/16; F03B-013/18; F03B-013/20	EP2466118-A1 20 Jun 2012 F03B-013/16 201241 Pages: 31 English	EP2466118-A1 EP382336 15 Dec 2010	EP382336 15 Dec 2010	DIIDW:2012G83825
207	P	GE201305779-B	Wave energy converter, has pistons arranged in cylinder and fixed to blade along float axis, and operative nodes allocated together along wave spread direction, where blade is rigidly placed onto hollow shaft.	MERAB C	MERAB C (MERA-Individual)	201931341P	NOVELTY - The converter has operative nodes tied together and located along a float axis, and pistons arranged in a cylinder. The pistons are fixed to a blade along the float axis. The blade is rigidly placed onto a hollow shaft. The operative nodes are allocated together along wave spread direction.	Q54 (Non-positive displacement fluid engines (i.e. driven by fluid); Miscellaneous motors and machines for producing mechanical power/thrust (F03B,D,G,H)); X15 (Non-Fossil Fuel Power Generating Systems)	Q54-X; X15-C01	F03B-013/12	GE201305779-B 25 Feb 2013 F03B-013/12 201930 Pages: 1 Russian	GE201305779-B GE012069 24 Jan 2011	GE012069 24 Jan 2011	DIIDW:201931341P
208	P	US2016290311-A1; US10066595-B2	Wave energy conversion system for use in nearshore location for marine application, has actuated geometry component connected to body portion, where actuated geometry component modifies geometric profile of system.	THRESHER R	ALLIANCE SUSTAINABLE ENERGY LLC (ALLU-C)	201662362R	NOVELTY - The system has a body portion for transferring wave energy to a power take off device. An actuated geometry component is connected to the body portion, where the actuated geometry component modifies a geometric profile of the system by modifying an area of a surface of the body portion. A processor is communicatively coupled to the actuated geometry component. The processor receives an …	Q54 (Non-positive displacement fluid engines (i.e. driven by fluid); Miscellaneous motors and machines for producing mechanical power/thrust (F03B,D,G,H)); X15 (Non-Fossil Fuel Power Generating Systems)	Q54-X; X15-C01B2	F03B-013/16; F03B-013/14; F03B-013/18; F03B-013/20	US2016290311-A1 06 Oct 2016 F03B-013/16 201669 Pages: 34 English	US2016290311-A1 US088818 01 Apr 2016	US142113P 02 Apr 2015	DIIDW:201662362R
209	P	CN102588199-A	Offshore wave energy conversion device for capturing gravity waves of sea, has hydraulic cylinder connected with piston rod to move up and down direction, and energy conversion mechanism connected with hydraulic cylinder through pipeline.	TAN J	TAN J (TANJ-Individual)	2012L81241	NOVELTY - The device has a wave vibration coupling mechanism connected with a suspension frame. The wave vibration coupling mechanism is provided with a hydraulic cylinder. The hydraulic cylinder is connected with a piston rod to move up and down direction. An energy conversion mechanism is connected with the hydraulic cylinder through a pipeline. An inner side of the suspension frame is provided…	Q54 (Non-positive displacement fluid engines (i.e. driven by fluid); Miscellaneous motors and machines for producing mechanical power/thrust (F03B,D,G,H)); X15 (Non-Fossil Fuel Power Generating Systems)	X15-C01B2	F03B-013/22	CN102588199-A 18 Jul 2012 F03B-013/22 201263 Pages: 9 Chinese	CN102588199-A CN10028908 09 Feb 2012	CN10028908 09 Feb 2012	DIIDW:2012L81241
210	P	CN113027667-A; CN113027667-B	Variable windward angle wave energy conversion device, has first rotating rod whose side is connected with supporting plates far away from second rotating rod, and linkage mechanism for changing angle between first and second rotating rods.	XU P	UNIV ZHEJIANG OCEAN (UYZO-C)	202176926E	NOVELTY - The device has a floating cylinder whose lower end is fixedly connected with an anchor (12) through a steel wire rope (11). An upper side surface of the floating cylinder is vertically connected with an upright post (13). Ends of first and second rotating rods (2, 3) are fixedly connected with an outer side of the upright post. A side of the first rotating rod is connected with two supp…	Q54 (Non-positive displacement fluid engines (i.e. driven by fluid); Miscellaneous motors and machines for producing mechanical power/thrust (F03B,D,G,H)); X15 (Non-Fossil Fuel Power Generating Systems)	Q54-X; X15-C01	F03B-013/20	CN113027667-A 25 Jun 2021 F03B-013/20 202161 Pages: 18 Chinese	CN113027667-A CN10300764 22 Mar 2021	CN10300764 22 Mar 2021	DIIDW:202176926E
211	P	IN202041054633-A	Non-submerged sea-waves energy converter for converting sea-waves into dynamic energy, has long beams/shafts that holds and supports sea wave energy conversion components of device while radial arms are connected all around shaft.	VOORADI R P	VOORADI R P (VOOR-Individual)	2021019881	NOVELTY - The energy converter has one or more long beams, or shafts to hold and support sea wave energy conversion components of the device. The radial arms are connected to shaft at equal angular intervals all around shaft, and blades are connected to shaft through radial arms, and buoyant objects for holding and supporting at predefined elevation above surface of sea water. The unit for holdin…	Q54 (Non-positive displacement fluid engines (i.e. driven by fluid); Miscellaneous motors and machines for producing mechanical power/thrust (F03B,D,G,H)); X11 (Power Generation and High Power Machines); X15 (Non-Fossil Fuel Power Generating Systems)	Q54-X; X11-B; X15-C01A	F03B-013/18	IN202041054633-A 25 Dec 2020 F03B-013/18 202106 Pages: 54 English	IN202041054633-A IN41054633 15 Dec 2020	IN41054633 15 Dec 2020	DIIDW:2021019881
212	P	US2017298899-A1; US10197040-B2	Method for extracting energy from water waves, involves providing a wave energy converter including a buoy in water with heave wave motion, and applying the computed control force to the buoy to extract energy from the heave wave motion.	ABDELKHALIK O	KORDE U (KORD-Individual)	201770900W	NOVELTY - The method involves providing a wave energy converter including a buoy in water with heave wave motion. An excitation force of the heave wave motion is estimated on the buoy. A control force is computed from the estimated excitation force using a dynamic model. A Hamiltonian is constructed as a function of buoy states. The partial derivatives of the Hamiltonian is computed with respect …	Q54 (Non-positive displacement fluid engines (i.e. driven by fluid); Miscellaneous motors and machines for producing mechanical power/thrust (F03B,D,G,H)); T06 (Process and Machine Control); X15 (Non-Fossil Fuel Power Generating Systems)	Q54-X; T06-A04A6; T06-A08; X15-C01	F03B-013/16; F03B-015/00; G05B-019/406	US2017298899-A1 19 Oct 2017 F03B-015/00 201772 Pages: 45 English	US2017298899-A1 US466605 22 Mar 2017	US322712P 14 Apr 2016	DIIDW:201770900W
213	P	CN103527394-A	Wave energy converter has hydraulic pump whose output end is divided into first path connected with safety protection overflow valve and second path passed through one-way valve.	JIN T	UNIV ZHEJIANG ZHOUSHAN OCEAN RES CENT (UYZH-C)	2014E99214	NOVELTY - The wave energy converter has water chamber wall (3) which is vertically installed on piston rod through guide rail. The hydraulic cylinder (4) and back water chamber wall are fixedly connected together. The water chamber wall is moved along chamber base (1). The input end of hydraulic pump (8) is connected to oil tank (9). The output end of hydraulic pump is divided into first path con…	Q54 (Non-positive displacement fluid engines (i.e. driven by fluid); Miscellaneous motors and machines for producing mechanical power/thrust (F03B,D,G,H)); X15 (Non-Fossil Fuel Power Generating Systems)	X15-C01C	F03B-013/16	CN103527394-A 22 Jan 2014 F03B-013/16 201422 Pages: 5 Chinese	CN103527394-A CN10509259 25 Oct 2013	CN10509259 25 Oct 2013	DIIDW:2014E99214
214	P	GB2451879-A; WO2009022186-A2; WO2009022186-A3	Wave energy converter for generating electricity from wave energy, has hydraulic rams which couple float to stationary resistance or drag plate, and coupled to lateral hydraulic rams to conditionally compress flexible container.	PALMER B W	WORLDWAVEPOWER LTD (WORL-Non-standard)	2009F05976	NOVELTY - The converter (1) includes a flexible container (2) installed with a buoyant float (3) at its one end. The float includes a buoyant chamber (13) and a header tank (4) which receive water pumped from within the flexible container. Water is drained from the header tank through a channel (7), and drives a turbine (8). Hydraulic rams (17) couple the float to a stationary resistance or drag …	Q54 (Non-positive displacement fluid engines (i.e. driven by fluid); Miscellaneous motors and machines for producing mechanical power/thrust (F03B,D,G,H)); X15 (Non-Fossil Fuel Power Generating Systems)	X15-C01	F03B-013/18; F24J-000/00; F03B-013/20	GB2451879-A 18 Feb 2009 F03B-013/18 200914 Pages: 12 English	GB2451879-A GB015961 16 Aug 2007	GB015961 16 Aug 2007	DIIDW:2009F05976
215	P	CN111535977-A; CN212337523-U; ZA202007635-A	Wave energy generating structure, has gas channel is provided with a turbine generator set. The turbine generator set is provided with an air turbine. A generator set is connected with the air turbine in transmission manner.	YU T	UNIV CHINA OCEAN (UYOC-C)	202080662Y	NOVELTY - The structure has two ship bodies whose unit are respectively provided with a guide hole. Two suspension chains are respectively fixed in two guide holes. The ship bodies is respectively provided with an oscillating water column type wave energy conversion device with a same number. An air chamber openings of each oscillation water column type wave energy conversion device is located on…	Q24 (Ships; waterborne vessels; related equipment (B63)); Q54 (Non-positive displacement fluid engines (i.e. driven by fluid); Miscellaneous motors and machines for producing mechanical power/thrust (F03B,D,G,H)); X15 (Non-Fossil Fuel Power Generating Systems)	Q24-C02; Q24-P; Q54-X; X15-C01	B63B-021/50; B63B-035/00; F03B-013/14; B63B-000/00; F03B-000/00	CN111535977-A 14 Aug 2020 F03B-013/14 202070 Pages: 8 Chinese	CN111535977-A CN10302452 17 Apr 2020	CN10302452 17 Apr 2020	DIIDW:202080662Y
216	P	CN109340031-A	Double-floating hinge platform stabilization marine power generation wave energy conversion device, has supporting seat welded to bottom part to hinged platform, and linking part stabilization device fixed to supporting seat hinge platform.	LIU M	UNIV HARBIN ENGINEERING (UHEG-C)	201917671S	NOVELTY - The device has a double floating bodies hinged through bolt and a hinge platform. The hinge platform is connected with a fixing supporting seat through a hinge. The fixing supporting seat is welded to a bottom part of the hinged platform. A linking part of the stabilization device is fixed to the fixing supporting seat the hinge platform by bolts. A vibration power generation device is …	Q24 (Ships; waterborne vessels; related equipment (B63)); Q54 (Non-positive displacement fluid engines (i.e. driven by fluid); Miscellaneous motors and machines for producing mechanical power/thrust (F03B,D,G,H)); X11 (Power Generation and High Power Machines); X15 (Non-Fossil Fuel Power Generating Systems)	Q24-P08; Q54-X; X11-B; X11-J07; X11-U05; X15-C01	B63B-035/44; F03B-013/20	CN109340031-A 15 Feb 2019 F03B-013/20 201929 Pages: 7 Chinese	CN109340031-A CN10965877 23 Aug 2018	CN10965877 23 Aug 2018	DIIDW:201917671S
217	P	CN106762361-A	Mushroom oscillating water column wave energy conversion device, has water column for generating upper and lower vibrating force inside air chamber to realize gas compression and expansion process for rotating turbine generating device.	ZHANG C	UNIV DALIAN TECHNOLOGY (UYDA-C)	201737980V	NOVELTY - The device has an air chamber provided with a cylindrical ring body and a hemispherical body. The hemispherical body is located on the cylindrical ring body with same radius. The hemispherical ring body is provided with an air pipe that is connected with a turbine generating device for realizing rotation under action of bidirectional airflow of a pile foundation structure. A water colum…	Q54 (Non-positive displacement fluid engines (i.e. driven by fluid); Miscellaneous motors and machines for producing mechanical power/thrust (F03B,D,G,H)); X15 (Non-Fossil Fuel Power Generating Systems)	Q54-X; X15-C01	F03B-013/14	CN106762361-A 31 May 2017 F03B-013/14 201747 Pages: 5 Chinese	CN106762361-A CN11086659 01 Dec 2016	CN11086659 01 Dec 2016	DIIDW:201737980V
218	P	WO2009139644-A2; WO2009139644-A3; NZ567380-A	Wave energy converter mounted under sea, has ramped wave board which is set at specific degree, so that sea water enters through lower end of wave board and passes to wave box through the upper end.	WARDROP P V	WARDROP P V (WARD-Individual)	2009R37479	NOVELTY - The converting apparatus comprises a ramped wave board (1), wave box (2), turbine and set of wheels (3) and tracks (4) for transportation. The housing of converting apparatus is transported through wheels and tracks during usage. The wave board is set at specific degree, so that the sea water is made to enter through the lower end (5) of wave board and passed to the wave box through the…	Q54 (Non-positive displacement fluid engines (i.e. driven by fluid); Miscellaneous motors and machines for producing mechanical power/thrust (F03B,D,G,H)); X15 (Non-Fossil Fuel Power Generating Systems)	X15-C01	F03B-013/12; F03B-013/22; F03B-017/00; E02B-009/08; F03B-013/14; F03B-013/16	WO2009139644-A2 19 Nov 2009 F03B-013/12 200977 Pages: 12 English	WO2009139644-A2 WONZ000001 09 Jan 2009	NZ567380 14 Apr 2008	DIIDW:2009R37479
219	P	WO2009098514-A2; WO2009098514-A3; AU2009211156-A1; EP2245299-A2; US2011012358-A1; CA2713853-A1; EP2245299-B1; ES2538222-T3	Floating, self-reacting wave energy conversion apparatus for converting wave energy into useful electrical power, has converters for converting kinetic energy of relative movement between buoyant members and reaction masses into power.	BREWSTER P	PURE MARINE GEN LTD (PURE-Non-standard)	2009M53295	NOVELTY - The apparatus (10) has movable reaction masses suspended beneath buoyant members e.g. floating buoy (12), by a set of linkages. Each linkage comprises an elongate non-rigid member which allows each buoyant member or each reaction mass to move relative to one another. Each linkage is associated with an extensible member that provides a restoring force for biasing the linkage to a non-ext…	Q54 (Non-positive displacement fluid engines (i.e. driven by fluid); Miscellaneous motors and machines for producing mechanical power/thrust (F03B,D,G,H)); X15 (Non-Fossil Fuel Power Generating Systems)	X15-C01	F03B-013/18; F03B-013/20; H02K-044/08	WO2009098514-A2 13 Aug 2009 F03B-013/18 200955 Pages: 42 English	WO2009098514-A2 WOGB050116 06 Feb 2009	GB002291 07 Feb 2008	DIIDW:2009M53295
220	P	CN105298728-A; CN105298728-B	Raw fish fin wave energy conversion device, has rotary absorber fixed with positive rotation wheel along heaving movement direction, where rotary absorber and electric generator are fixedly connected with shell along rotary axis direction.	LUO Z	UNIV NAT DEFENSE TECHNOLOGY (UNDT-C)	201609803L	NOVELTY - The device has a heaving floating body (1) connected with a switching mechanism that is connected with an electric generator (8). The heaving floating body is connected with a rotary absorber (2) that is connected with a positive rotation wheel (21) along heaving movement direction. The rotary absorber and the electric generator are fixedly connected with a shell along rotary axis direc…	Q54 (Non-positive displacement fluid engines (i.e. driven by fluid); Miscellaneous motors and machines for producing mechanical power/thrust (F03B,D,G,H)); X15 (Non-Fossil Fuel Power Generating Systems)	Q54-X; X15-C01	F03B-013/14	CN105298728-A 03 Feb 2016 F03B-013/14 201614 Pages: 13 English	CN105298728-A CN10739158 04 Nov 2015	CN10739158 04 Nov 2015	DIIDW:201609803L
221	P	CN104832363-A	Wave-energy conversion and utilization device, has fixing plate arranged with protecting cover, piston whose bottom part is provided with compression mechanism, and compression device arranged at upper part of water inlet and water outlet.	GAO Y	UNIV ZHEJIANG OCEAN (UYZO-C)	201559102A	NOVELTY - The device has a fixing plate (2) arranged with a protecting cover (6). A balance weight box (1), a compressing device (3) and the protecting cover are arranged in an equilateral triangle manner. The compression device is provided with a compression cylinder. The compression cylinder is arranged with a compressing rod and a piston. A bottom part of the piston is provided with a compress…	Q54 (Non-positive displacement fluid engines (i.e. driven by fluid); Miscellaneous motors and machines for producing mechanical power/thrust (F03B,D,G,H)); X15 (Non-Fossil Fuel Power Generating Systems)	X15-C01	F03B-013/22	CN104832363-A 12 Aug 2015 F03B-013/22 201570 Pages: 7 Chinese	CN104832363-A CN10262937 21 May 2015	CN10262937 21 May 2015	DIIDW:201559102A
222	P	CN103669303-A; CN103669303-B	Wave energy based power generation device, has mounting bracket connected with mounting platform that is connected with multi-wave energy conversion device, and power generation module connected with pressure conveying pipeline.	LIU A	SHANGHAI LICE TECHNOLOGY CO LTD (SHAN-Non-standard)	2014J78298	NOVELTY - The device has a mounting bracket (12) connected with a sub-mount bracket (13) that is provided with a mounting platform (8). The mounting bracket is connected with the mounting platform. The mounting platform is connected with a multi-wave energy conversion device (4). A power generation module is connected with a pressure conveying pipeline (3). The power generation module is connecte…	Q42 (Hydraulic engineering, soil shifting and sewerage (E02, 3)); Q54 (Non-positive displacement fluid engines (i.e. driven by fluid); Miscellaneous motors and machines for producing mechanical power/thrust (F03B,D,G,H)); X11 (Power Generation and High Power Machines); X15 (Non-Fossil Fuel Power Generating Systems)	X11-B; X11-J07; X15-C01	E02B-009/08; F03B-013/22; F03B-013/24	CN103669303-A 26 Mar 2014 E02B-009/08 201433 Pages: 12 Chinese	CN103669303-A CN10552812 08 Nov 2013	CN10552812 08 Nov 2013	DIIDW:2014J78298
223	P	GB2496856-A; GB2496856-B	Device forming unit of wave energy converter, has inclined dome surface that alters movement of impinging waves to provide resistance to applied forces, and water holding portion that is enclosed within device main portion.	MANN D F	MANN D F (MANN-Individual)	2013J50474	NOVELTY - The unit has an inclined dome surface that alters the movement of impinging waves to provide resistance to applied forces by wave operated elements, and a water holding portion is enclosed within a device main portion. The vertical and horizontal plates (3,6) are provided within the device and lying within the water holding portion to enable the device main portion to resist forces acti…	Q54 (Non-positive displacement fluid engines (i.e. driven by fluid); Miscellaneous motors and machines for producing mechanical power/thrust (F03B,D,G,H)); X15 (Non-Fossil Fuel Power Generating Systems)	X15-C01	F03B-013/20; F03B-013/24	GB2496856-A 29 May 2013 F03B-013/20 201337 Pages: 9 English	GB2496856-A GB020101 22 Nov 2011	GB020101 22 Nov 2011	DIIDW:2013J50474
224	P	CN106593755-A; CN106593755-B	Universal swing-type wave energy converting device, has floater whose lower end is provided with universal bearing that is sleeved with bearing sleeve, and first base connected with second base by multiple vertical rods.	CHEN C	UNIV QINGDAO TECHNOLOGY (UQDT-C)	201728227E	NOVELTY - The device has a floater (1) whose lower end is provided with a universal bearing (2) that is fixed with a bearing sleeve (21). The sleeve is connected with a first base (6). An end of the universal bearing is connected with an end of a first universal coupling (3). Another end of the first universal coupling is connected with a rotor (41) of a linear generator (4). A stator (42) is fix…	Q54 (Non-positive displacement fluid engines (i.e. driven by fluid); Miscellaneous motors and machines for producing mechanical power/thrust (F03B,D,G,H)); X15 (Non-Fossil Fuel Power Generating Systems)	Q54-X; X15-C01	F03B-011/00; F03B-011/06; F03B-013/14	CN106593755-A 26 Apr 2017 F03B-013/14 201731 Pages: 9 Chinese	CN106593755-A CN10053413 24 Jan 2017	CN10053413 24 Jan 2017	DIIDW:201728227E
225	P	CN117145685-A; CN117145685-B	Electromagnetic tuning wave energy conversion device for floating fan platform, has fan upright post whose side wall is provided with upper supporting beam and lower supporting beam along length direction, and driving cylinder is set on upper supporting beam.	LI S	UNIV WUHAN TECHNOLOGY SANYA SCI & EDUCA (UYWL-C)	2023D08592	NOVELTY - The electromagnetic tuning wave energy conversion device has a fan upright post (1) whose side wall is provided with an upper supporting beam (11) and a lower supporting beam (12) along the length direction. The oscillation body (2) can be movably coaxially sleeved on the fan upright post and located between the upper supporting beam and the lower supporting beam. The lower end face of …	Q63 (Couplings; clutches; brakes; springs; dampers (F16D,F)); ; V06 (Electromechanical Transducers and Small Machines); X15 (Non-Fossil Fuel Power Generating Systems); X11 (Power Generation and High Power Machines)	Q63-E01A; Q63-E02E; Q54-G; Q54-X; V06-M04; X15-B01; X15-C01; X11-B; X11-G	F03B-013/14; F03B-013/16; F03D-013/25; F16F-015/03; F16F-015/067; H02K-035/02	CN117145685-A 01 Dec 2023 F03B-013/14 202302 Chinese	CN117145685-A CN11377988 24 Oct 2023	CN11377988 24 Oct 2023	DIIDW:2023D08592
226	P	GB2510928-A; WO2015001115-A1; GB2510928-B; AU2014286064-A1; EP3017188-A1; US2016169188-A1; AU2014286064-B2; JP2017505394-W; EP3017188-B1; ES2683328-T3; JP6502933-B2; US10557453-B2	Wave energy converter has power take off portion responsive to vented air resultant from reaction of point absorber against surface of enclosed column of sea water and adjustable reference mass that is five times displacement of buoy.	DICK W	DICK W (DICK-Individual)	2014P65397	NOVELTY - The converter (100) has chamber (105) in fluid communication with sea water to effect trapping of volume of air between top surface of column of sea water and top surface of chamber. Point absorber (122) is adapted to expand and compress trapped volume of air to expand and compress column of sea water. Power take off portion is provided in communication with and responsive to air vented…	Q54 (Non-positive displacement fluid engines (i.e. driven by fluid); Miscellaneous motors and machines for producing mechanical power/thrust (F03B,D,G,H)); X15 (Non-Fossil Fuel Power Generating Systems)	X15-C01C	F03B-013/20; F03B-013/24; H02K-007/18	GB2510928-A 20 Aug 2014 F03B-013/20 201458 Pages: 34 English	GB2510928-A GB012094 05 Jul 2013	GB012094 05 Jul 2013	DIIDW:2014P65397
227	P	CN104454320-A	Wave energy conversion device, has device body provided with buoy, cable, electric generator and conduit, where generator is driven by loosening cable for rotating to generate electric energy when buoy is moved downward direction.	KUANG Z	FENIMA INNOVATION CO LTD (FENI-Non-standard)	2015296304	NOVELTY - The device has a device body (2) mounted in a mounting table (1). The device body is provided with a buoy, a tying cable, an electric generator and a conduit. The cable is wound on a rotor of the generator. An end of the cable is connected with the buoy. Another end of the cable is connected with a reset mechanism. The generator is driven by loosening the cable for rotating to generate …	Q54 (Non-positive displacement fluid engines (i.e. driven by fluid); Miscellaneous motors and machines for producing mechanical power/thrust (F03B,D,G,H)); X15 (Non-Fossil Fuel Power Generating Systems)	X15-C01A1	F03B-013/16	CN104454320-A 25 Mar 2015 F03B-013/16 201535 Pages: 9 Chinese	CN104454320-A CN10443113 25 Sep 2013	CN10443113 25 Sep 2013	DIIDW:2015296304
228	P	WO2017221262-A1; IN201641021029-A	Wave energy conversion system for converting energy available in water bodies, has body for generating reciprocating motion from passing waves with power takeoff mechanism, where rotary motion is engaged to electricity generating systems.	KANNAN V T	KANNAN V T (KANN-Individual)	201800040V	NOVELTY - The system has a wave energy activated body for generating reciprocating motion from passing waves with a power takeoff mechanism being driven by the wave energy activated body, which converts the reciprocating motion to rotary motion, where the rotary motion is engaged to electricity generating systems or energy conversion systems. The wave activated body is a floating body with adequa…	Q54 (Non-positive displacement fluid engines (i.e. driven by fluid); Miscellaneous motors and machines for producing mechanical power/thrust (F03B,D,G,H)); X15 (Non-Fossil Fuel Power Generating Systems)	Q54-X; X15-C01	F03B-013/14; F03B-013/00	WO2017221262-A1 28 Dec 2017 F03B-013/14 201804 Pages: 10 English	WO2017221262-A1 WOIN000107 16 Jun 2017	IN41021029 20 Jun 2016	DIIDW:201800040V
229	P	GB2487819-A; GB2487819-B	Wave energy conversion device for absorbing energy from sea waves, has power converter that is extended and compressed repeatedly due to movement of buoyant portion.	PITCHFORD J	PITCHFORD J (PITC-Individual)	2012K19990	NOVELTY - The device has a mooring cable (7) that attaches between sea bed and end of beam. The beam (4) is provided to overlap leading side of buoyant portion (1). The beam is supported on one side of buoyant portion by spring (5) and power converter (6) and on another side of buoyant portion by pivot (3). The weight (2) is attached to either end of beam or to cantilever. The series of waves pas…	Q54 (Non-positive displacement fluid engines (i.e. driven by fluid); Miscellaneous motors and machines for producing mechanical power/thrust (F03B,D,G,H)); X15 (Non-Fossil Fuel Power Generating Systems)	X15-C01	F03B-013/18	GB2487819-A 08 Aug 2012 F03B-013/18 201253 Pages: 11 English	GB2487819-A GB022396 23 Dec 2011	GB001825 03 Feb 2011	DIIDW:2012K19990
230	P	CN210738731-U; CN111852737-A	Axial supporting piezoelectric-type wave energy converting device for bridge pier, has floating body fixed on surface of piezoelectric film that is connected with charging battery, illuminating lamp or warning device.	ZHANG H	UNIV ZHEJIANG OCEAN (UYZO-C)	202055216S	(CN210738731-U) NOVELTY - The utility model claims an axial supporting piezoelectric type wave energy converting device for pier, comprising a floating body buoyancy sleeve out of the pier, sleeved outside the floating sleeve, wherein, buoyancy sleeve inner surface and outer surface are provided with a piezoelectric film, the convex floating sleeve set on upper and lower pier radially, the projec…	Q54 (Non-positive displacement fluid engines (i.e. driven by fluid); Miscellaneous motors and machines for producing mechanical power/thrust (F03B,D,G,H)); V06 (Electromechanical Transducers and Small Machines); W05 (Alarms, Signalling, Telemetry and Telecontrol); X15 (Non-Fossil Fuel Power Generating Systems); X16 (Electrochemical Storage)	Q54-X; V06-M06D; V06-U04B; V06-V01E; W05-A03A; X15-C01; X16-G02	F03B-011/00; F03B-013/18; H02J-007/32; H02N-002/18	CN210738731-U 12 Jun 2020 F03B-013/18 202051 Pages: 6 Chinese	CN210738731-U CN21656986 30 Sep 2019	CN10943133 30 Sep 2019	DIIDW:202055216S
231	P	WO2021222221-A1; US2023220824-A1; US11920551-B2	Point absorber wave energy converter for use in tethered or moored type installation, has buoy secured at upper end of pull cord, where relative distancing movement of buoy provides oscillating linear motion.	BROWN G	UNIV MASSACHUSETTS (UMAC-C)	2021C2287J	NOVELTY - The point absorber wave energy converter has a stabilizing system that is connected to a lower end of housing (24). A generator (46) is provided within the housing and the first and second drive shafts (22, 38) are mounted within the housing for bi-directional and single directional rotations. The second drive shaft is rotationally coupled to generator and a one-way coupler is provided …	Q54 (Non-positive displacement fluid engines (i.e. driven by fluid); Miscellaneous motors and machines for producing mechanical power/thrust (F03B,D,G,H)); X15 (Non-Fossil Fuel Power Generating Systems)	Q54-X; X15-C01	F03B-013/16; F03B-013/18	WO2021222221-A1 04 Nov 2021 F03B-013/16 202191 Pages: 33 English	WO2021222221-A1 WOUS029364 27 Apr 2021	US016795P 28 Apr 2020	DIIDW:2021C2287J
232	P	WO2012095669-A1	Wave energy converter for extracting energy from waves in e.g. ocean, has pneumatic absorbers defining group of pneumatic absorbers connected in series by non-return valves to direct fluid along uni-directional flow pathway.	BELLAMY N W	BELLAMY N W (BELL-Individual)	2012J27009	NOVELTY - The converter (100) has an endless circular spine (102) supporting a set of pneumatic absorbers (106) spaced about the spine. Each pneumatic absorber includes an oscillator displaceable cyclically on contact with incident wave to pump fluid contained within the pneumatic absorbers. The pneumatic absorbers define a group of pneumatic absorbers connected in series by non-return valves (11…	Q54 (Non-positive displacement fluid engines (i.e. driven by fluid); Miscellaneous motors and machines for producing mechanical power/thrust (F03B,D,G,H)); X15 (Non-Fossil Fuel Power Generating Systems)	X15-C01	F03B-013/18; F03B-013/24	WO2012095669-A1 19 Jul 2012 F03B-013/18 201249 Pages: 39 English	WO2012095669-A1 WOGB050061 12 Jan 2012	GB000446 12 Jan 2011	DIIDW:2012J27009
233	P	WO2009148296-A2; WO2009148296-A3; AU2009255823-A1; GB2472753-A; KR2011025660-A; IN201004971-P2; US2011074160-A1; CN102057156-A; DE112009001343-T5; JP2011522169-W; MY143137-A; GB2472753-B; KR1270462-B1; AU2009255823-B2; SG166907-A1; JP5541465-B2; SG166907-B; US9018785-B2; ID512853-A	Structure placed on body of water such as sea or ocean for converting wave energy into electricity, has floating body, including bottom and side hulls, which provide structure support and define maw.	CHUA S K	CHUA S K (CHUA-Individual)	2009S14416	NOVELTY - The structure has a floating body, including a bottom hull (109) and side hulls (107), supporting the structure and forming a maw (113), wave energy conversion mechanisms (105) to transfer wave motion into a continuous reciprocal motion, energy conversion systems cooperating with wave energy conversion mechanisms to generate electricity, and a platform (101) to house the wave energy con…	Q54 (Non-positive displacement fluid engines (i.e. driven by fluid); Miscellaneous motors and machines for producing mechanical power/thrust (F03B,D,G,H)); X15 (Non-Fossil Fuel Power Generating Systems)	X15-C01	F03B-013/12; F03B-013/14; F03B-013/16; F03B-017/02; F03B-013/20; F03B-013/18; F03B-013/10	WO2009148296-A2 10 Dec 2009 F03B-013/16 200982 Pages: 26 English	WO2009148296-A2 WOMY000066 01 Jun 2009	MY001889 02 Jun 2008	DIIDW:2009S14416
234	P	RU2390652-C1	Wave electric power station, comprises turbine with generator, wave energy converters working medium influencing turbine blades by means of pipelines.	DEMIDOV L N	MILITARY ACAD ROCKET FORCES (MILI-Non-standard)	2010F62406	NOVELTY - Wave electric power station includes turbine with generator, wave energy converters the working medium of which influences turbine blades by means of pipelines. Converters are submerged to the bottom and made in the form of flattened cone or prism with cutouts providing water supply to create excess pressure of working medium in upper narrower part of converters.	Q54 (Non-positive displacement fluid engines (i.e. driven by fluid); Miscellaneous motors and machines for producing mechanical power/thrust (F03B,D,G,H)); X11 (Power Generation and High Power Machines); X15 (Non-Fossil Fuel Power Generating Systems)	X11-B; X15-C01	F03B-013/22	RU2390652-C1 27 May 2010 201036 Pages: 0 Russian	RU2390652-C1 RU149382 16 Dec 2008	RU149382 16 Dec 2008	DIIDW:2010F62406
235	P	US2015069761-A1; US9212649-B2	Wave energy convertor for use in energy generation, has ratchet gear in which forward direction is being angularly opposite to angular upstroke direction.	HEIM J J	HEIM J J (HEIM-Individual)	201518065D	NOVELTY - The wave energy convertor has float arm (4) being restricted to a specified angular upstroke direction, in which an upstroke is caused by a buoyant force applied to the float by a wave. The output axle is being rotationally connected to the electrical generator. An input axle is torsionally and mechanically coupled to the output axle through one pulley system. A ratchet gear (6) is rota…	Q54 (Non-positive displacement fluid engines (i.e. driven by fluid); Miscellaneous motors and machines for producing mechanical power/thrust (F03B,D,G,H)); V06 (Electromechanical Transducers and Small Machines); X11 (Power Generation and High Power Machines); X15 (Non-Fossil Fuel Power Generating Systems)	V06-M10; X11-B; X11-J05B; X11-J05X; X15-C01A1	F03B-013/18; H02K-007/02; H02K-007/07; H02K-007/18	US2015069761-A1 12 Mar 2015 F03B-013/18 201520 Pages: 11 English	US2015069761-A1 US480997 09 Sep 2014	US875331P 09 Sep 2013	DIIDW:201518065D
236	P	WO2017074237-A1; SE201530168-A1; SE539439-C2; EP3368406-A1; US2018312224-A1; EP3368406-A4; US10328996-B2; EP3368406-B1	Connection substation for set of wave energy converters of wave power station, has connecting device for electrically connecting set of power cables that are run, so that portion of cable extends up to level above waterline.	ALM F	W4P WAVES4POWER AB (WFOU-Non-standard)	201729100R	NOVELTY - The substation (100) has a connecting device (103) for electrically connecting a set of input power cables (C1, C2) for transmission of generated electric power from wave energy converters (WEC1, WEC2) to a common output cable (C3) and for transmission of electric power from a wave power station (101) to an electrical grid. A fastening device (105) is arranged in vicinity of a bottom en…	A88 (Mechanical engineering and tools e.g. valves, gears and conveyor belts.); A95 (Transport - including vehicle parts, tyres and armaments.); W06 (Aviation, Marine and Radar Systems); X11 (Power Generation and High Power Machines); X15 (Non-Fossil Fuel Power Generating Systems)	A12-H; A12-T02; A12-T04; W06-C01; W06-C15G; X11-B; X15-C01	B63B-035/44; F03B-013/14; B63B-021/50; F03B-013/26	WO2017074237-A1 04 May 2017 B63B-035/44 201733 Pages: 24 English	WO2017074237-A1 WOSE000061 24 Oct 2016	SE030168 26 Oct 2015	DIIDW:201729100R
237	P	WO2024003077-A1	Wave energy converter e.g. submerged pressure differential wave energy converter, has energy transmitting device for presenting energy recovery configuration allowing deformation of flexible envelope towards inflatable element.	BOURDIN O	WAVE MINING SOLUTIONS LTD (WAVE-Non-standard)	202403015J	NOVELTY - The converter has an energy transmitting device (1) configured to be placed within a granular medium (2) e.g. sand or sediment.The energy transmitting device comprises a flexible envelope (11) forming an internal volume (110). A inflatable element (12) contains a fluid and housed in the internal volume so as to be interposed between an upper surface (11a) and a lower surface. An energy …	A88 (Mechanical engineering and tools e.g. valves, gears and conveyor belts.); Q54 (Non-positive displacement fluid engines (i.e. driven by fluid); Miscellaneous motors and machines for producing mechanical power/thrust (F03B,D,G,H)); X15 (Non-Fossil Fuel Power Generating Systems)	A12-H; Q54-X; X15-C01	F03B-013/14; F03B-013/18	WO2024003077-A1 04 Jan 2024 F03B-013/14 202404 Pages: 56 English	WO2024003077-A1 WOEP067516 27 Jun 2023	EP181618 28 Jun 2022	DIIDW:202403015J
238	P	GB2483270-A	Buoyant wave energy converter for converting energy from ocean waves into electricity, has compartments, located around centrally-located rotor, which are in fluid communication so to permit fluid passage which causes rotor to rotate.	THAXTER I	THAXTER I (THAX-Individual)	2012C90065	NOVELTY - The buoyant wave energy converter has compartments (26,28,30,32,34,36) for receiving fluid disposed around a centrally-located rotor (20). The compartments are in fluid communication such that fluid can pass from one compartment to another in response to wave motion so as to rotate the rotor into producing electricity. Preferably, each compartment is configured to channel fluid towards …	Q54 (Non-positive displacement fluid engines (i.e. driven by fluid); Miscellaneous motors and machines for producing mechanical power/thrust (F03B,D,G,H)); X15 (Non-Fossil Fuel Power Generating Systems)	X15-C01	F03B-013/22	GB2483270-A 07 Mar 2012 F03B-013/22 201218 Pages: 26 English	GB2483270-A GB014573 02 Sep 2010	GB014573 02 Sep 2010	DIIDW:2012C90065
239	P	US2010123313-A1; WO2010056956-A2; WO2010056956-A3; EP2356332-A2; US8026620-B2; EP2356332-B1; EP2356332-A4	Wave energy converter for converting energy provided by waves in body of water into electricity has pendulum adjusting unit that is operatively connected to pendulum for changing center of gravity of pendulum.	HOBDY M	HOBDY M (HOBD-Individual)	2010F34136	NOVELTY - A wave energy converter (100) comprises a pendulum (15) that is pivotally positioned in a shell (1) while having a magnet (18). A variable inductance unit (12) varies an inductive capacity while positioned in the shell and having at least one wire coil (20). The magnet of pendulum oscillates relative to the wire coil. A pendulum adjusting unit (9) is operatively connected to the pendulu…	Q54 (Non-positive displacement fluid engines (i.e. driven by fluid); Miscellaneous motors and machines for producing mechanical power/thrust (F03B,D,G,H)); X13 (Switchgear, Protection, Electric Drives); X15 (Non-Fossil Fuel Power Generating Systems)	X13-G02A; X15-C01	F03B-013/14; H02P-009/14; F03B-013/00; F03B-013/20; F03G-007/08; H02K-035/02; H02K-007/18	US2010123313-A1 20 May 2010 H02P-009/14 201035 Pages: 20 English	US2010123313-A1 US271743 14 Nov 2008	US271743 14 Nov 2008	DIIDW:2010F34136
240	P	US2013068629-A1; US9151266-B2	Ocean wave energy conversion unit such as aqua-tamer for converting kinetic energy from oceanic waves into useable form of energy, has continuously variable transmission which is connected to power generating unit.	BULACLAC A L	BULACLAC A L (BULA-Individual)	2013E08387	NOVELTY - The ocean wave energy conversion unit has an energy conversion unit formed with vertical holes (51,52) being provided with traction beams (53,54) that linearly translate through the vertical hole. The drive wheels are engaged on traction beam, and are connected to transmission that changes bi-directional rotation into unidirectional rotational motion. A transmission is connected to cont…	E36 (Non-metallic elements, semi-metals (Se, Te, B, Si) and their compounds (except for E35).); J03 (Electrochemical processes and electrophoresis - including ozone production, brine electrolysis, water electrolysis, production of chemical compounds and non-metallic elements, but excluding batteries or other means of producing power and the treatment of metals (C25B).); Q54 (Non-positive displace…	E11-N; E31-A02A; E31-D01; J03-B; X15-C01; X25-R01	C25B-001/04; F03B-013/18; H02P-009/04	US2013068629-A1 21 Mar 2013 C25B-001/04 201322 Pages: 13 English	US2013068629-A1 US412366 05 Mar 2012	US537400P 21 Sep 2011	DIIDW:2013E08387
241	P	WO2023199048-A1; GB2621103-A	Wave energy converter for capturing energy from waves in body of water, has cylindrical moving body moved with passing waves, and coupler mechanism connected between moving body and force application mechanism or component.	MAUGHAN H J J	MAUGHAN H J J (MAUG-Individual)	2023B0382A	NOVELTY - The converter has a cylindrical moving body (1) moved with passing waves. A coupler mechanism is connected between the moving body and a force application mechanism or component (6). The force application mechanism or component applies force to the moving body. The coupler mechanisms are connected to the force application mechanism or component. The coupler mechanisms connect and discon…	Q54 (Non-positive displacement fluid engines (i.e. driven by fluid); Miscellaneous motors and machines for producing mechanical power/thrust (F03B,D,G,H)); X15 (Non-Fossil Fuel Power Generating Systems)	Q54-X; X15-C01	F03B-013/16; F03B-013/18	WO2023199048-A1 19 Oct 2023 F03B-013/16 202386 Pages: 484 English	WO2023199048-A1 WOGB050973 11 Apr 2023	GB005453 12 Apr 2022	DIIDW:2023B0382A
242	P	CN105332851-A; CN105332851-B	Self-adapting limiting wing plate wave energy conversion device, has floating body provided with positive rotating absorber and reverse rotating absorber, and rotating shaft connected with reverse rotating wheel and electric generator.	LUO Z	UNIV NAT DEFENSE TECHNOLOGY (UNDT-C)	2016130582	NOVELTY - The device has a floating body (1) fixed with a wave absorbing switching mechanism. The wave absorbing switching mechanism is provided with an electric generator (8). The floating body is provided with a positive rotating absorber (2) and a reverse rotating absorber (3). The positive rotating absorber is provided with a positive rotation wheel (21), a positive limiting wing plate (22) a…	Q54 (Non-positive displacement fluid engines (i.e. driven by fluid); Miscellaneous motors and machines for producing mechanical power/thrust (F03B,D,G,H)); X15 (Non-Fossil Fuel Power Generating Systems)	Q54-X; X15-C01	F03B-013/22	CN105332851-A 17 Feb 2016 F03B-013/22 201616 Pages: 11 English	CN105332851-A CN10739094 04 Nov 2015	CN10739094 04 Nov 2015	DIIDW:2016130582
243	P	WO2008097116-A2; WO2008097116-A3	Gyroscopic power take off for submerged wave energy converter includes a crankshaft like structure mounted on a semicircular structure is symmetric and has a shaft supported also by the bearings.	ALBUQUERQUE J M B	ALBUQUERQUE J M B G (ALBU-Individual)	2008J71970	NOVELTY - The power take-off includes a crankshaft like structure (30) mounted on a semicircular structure (32) that rotates around the main symmetry axis (33) through bearings (16,17). The semicircular structure is symmetric and has a shaft (26) supported also by the bearings. The shaft drives the rotor of a rotary electrical generator, supported by the bearings. The electrical generator rotatio…	Q54 (Non-positive displacement fluid engines (i.e. driven by fluid); Miscellaneous motors and machines for producing mechanical power/thrust (F03B,D,G,H)); X15 (Non-Fossil Fuel Power Generating Systems)	X15-C01	F03B-013/18; F03B-013/20	WO2008097116-A2 14 Aug 2008 F03B-013/18 200856 Pages: 65 English	WO2008097116-A2 WOPT000007 05 Feb 2007	WOPT000007 05 Feb 2007	DIIDW:2008J71970
244	P	MD4446-B1	Wave energy conversion system, has blades arranged with each other through props in parallel manner, and common circuit fixed with pressure pipeline, supply pipeline, hydraulic turbine and electric generator.	PANCENCO V	PANCENCO V (PANC-Individual)	201925980A	NOVELTY - The system has two blades arranged with each other through props in parallel manner. The props are fixed with each other in parallel manner. An adjusting mechanism adjusts angle of the blades. Hydraulic cylinders are hinged with the blades and connected to a common circuit. The common circuit is fixed with a pressure pipeline, a supply pipeline, a hydraulic turbine and an electric gener…	Q54 (Non-positive displacement fluid engines (i.e. driven by fluid); Miscellaneous motors and machines for producing mechanical power/thrust (F03B,D,G,H)); X15 (Non-Fossil Fuel Power Generating Systems)	Q54-X; X15-C01	F03B-013/18; F03B-013/20	MD4446-B1 30 Nov 2016 F03B-013/18 201928 Pages: 1 Russian	MD4446-B1 MD000013 10 Feb 2016	MD000013 10 Feb 2016	DIIDW:201925980A
245	P	CN117287335-A	Wave energy collecting device for realizing multi-dimensional wave energy conversion, has main shaft hydraulic rod driven by floater to swing, and gear generator connected by gear-crank connecting rod mechanism to convert into electric energy.	GAO P	UNIV CHINA PETROLEUM (UYPE-C)	202405337A	NOVELTY - The device has a bracket (500) provided with an inner bracket and an outer bracket that are rotatably connected together. A gear-crank connecting rod mechanism (200) is fixed on the inner bracket. A gear-crank connecting rod mechanism and a main shaft hydraulic rod (300) are connected with a floater (400) in turn. The main shaft hydraulic rod is driven by the floater to swing, where hyd…	Q54 (Non-positive displacement fluid engines (i.e. driven by fluid); Miscellaneous motors and machines for producing mechanical power/thrust (F03B,D,G,H)); X15 (Non-Fossil Fuel Power Generating Systems)	Q54-X; X15-C01	F03B-013/20; F03B-015/00	CN117287335-A 26 Dec 2023 F03B-013/20 202406 Chinese	CN117287335-A CN11354662 18 Oct 2023	CN11354662 18 Oct 2023	DIIDW:202405337A
246	P	CN204663752-U	Oscillating type piezoelectric wave energy conversion energy saving device has double rectangular piezoelectric ceramic wafer vertical clamp whose end is fixed on upper bracket on which electric energy saving rectification unit is set.	CHAI M	UNIV NANCHANG HANGKONG (UYNH-C)	201566915M	NOVELTY - This new utility model claims of oscillating type piezoelectric wave energy conversion energy saving device, the structure character is: baffle plate and the connecting shaft rod connected with lower end floating body, a floating body upper end connected with push-pull rod, push-pull rod left and right second end installed with several rectangular magnet, a push-pull rod left and right …	Q54 (Non-positive displacement fluid engines (i.e. driven by fluid); Miscellaneous motors and machines for producing mechanical power/thrust (F03B,D,G,H)); X11 (Power Generation and High Power Machines); X15 (Non-Fossil Fuel Power Generating Systems)	X11-B; X15-C01	F03B-013/14	CN204663752-U 23 Sep 2015 F03B-013/14 201573 Pages: 6 Chinese	CN204663752-U CN20214271 11 Apr 2015	CN20214271 11 Apr 2015	DIIDW:201566915M
247	P	US8723353-B1; US2014138953-A1; WO2014078954-A1; CA2880233-A1	Wave energy converter used for damped vibration absorber application, whose mass, and dimensions of buoy are set during use condition, such that buoy floats in partially submerged position.	FRANKLIN B	FRANKLIN B (FRAN-Individual)	2014J72477	NOVELTY - The converter has a pneumatic spring that is provided between a spar (714) and a buoy (700) to provide restoring forces when spar is departed from a quiescent position relative to the buoy. A damping element is in a form of an induction generator having an armature and stator (712) that are fixed to spar and buoy to generate power, when the spar is moved relative to the buoy in the pres…	Q54 (Non-positive displacement fluid engines (i.e. driven by fluid); Miscellaneous motors and machines for producing mechanical power/thrust (F03B,D,G,H)); X11 (Power Generation and High Power Machines); X13 (Switchgear, Protection, Electric Drives); X15 (Non-Fossil Fuel Power Generating Systems)	X11-B; X13-A03; X13-A04A; X13-H02T7B; X13-H02X; X15-C01A1	F03B-013/10; F03B-013/12; H02P-009/04; F03B-013/20; F03B-013/16	US8723353-B1 13 May 2014 F03B-013/10 201438 Pages: 21 English	US8723353-B1 US683677 21 Nov 2012	US683677 21 Nov 2012	DIIDW:2014J72477
248	P	WO2012098357-A1; GB2505766-A	Wave energy conversion device for generating power by extracting energy from sea water waves, has support mast coupled to power extraction unit for extracting energy from movement of flap portion and support mast.	THOMSON A R	AQUAMARINE POWER LTD (AQUA-Non-standard)	2012J61981	NOVELTY - The device (14) has support masts (16,18) pivotally connected at a bottom end of a base portion (20), where the support mast anchors to bed of water body. The support masts and a flap portion (26) are biased, and move backward and forward in response to wave motion (28) acting on faces of the flap portion. The support mast is coupled to a power extraction unit for extracting energy from…	A88 (Mechanical engineering and tools e.g. valves, gears and conveyor belts.); Q54 (Non-positive displacement fluid engines (i.e. driven by fluid); Miscellaneous motors and machines for producing mechanical power/thrust (F03B,D,G,H)); X15 (Non-Fossil Fuel Power Generating Systems)	A12-H; X15-C01	F03B-013/18	WO2012098357-A1 26 Jul 2012 F03B-013/18 201250 Pages: 39 English	WO2012098357-A1 WOGB000050 20 Jan 2012	GB001068 21 Jan 2011	DIIDW:2012J61981
249	P	WO2024079377-A1	Power transmission arrangement for use in wave energy converter, has chain drive system equipped with cylindrical power transmission drum, which is arranged to rotate along with reciprocating panel and with chain for power unit.	KORTELAINEN V	AW-ENERGY OY (AWEN-Non-standard)	2024397219	NOVELTY - The arrangement has a chain drive system (5) equipped with a cylindrical power transmission drum, which is arranged to rotate along with a reciprocating panel (2) and with a chain for each power unit (4). The chain is arranged for transferring the rotational motion of the power drum to linear motion in the power unit. The drive system includes a motion element arranged to make a guided …	Q54 (Non-positive displacement fluid engines (i.e. driven by fluid); Miscellaneous motors and machines for producing mechanical power/thrust (F03B,D,G,H)); Q64 (Belts, chains, gearing (F16G,H)); X15 (Non-Fossil Fuel Power Generating Systems)	Q54-X; Q64-B01; Q64-C01; X15-C01	F03B-013/12; F03B-013/14; F03B-013/18; F16H-019/02	WO2024079377-A1 18 Apr 2024 F03B-013/12 202433 Pages: 19 English	WO2024079377-A1 WOFI050673 10 Oct 2022	WOFI050673 10 Oct 2022	DIIDW:2024397219
250	P	US2023160362-A1	Wave energy converter for converting energy of ocean waves into electricity, has two bodies that are attached to each other, buoyant body is moored to seabed, and fully submerged body is suspended from buoyant body by vertical suspender cables.	MADATOV A	BADO R (BADO-Individual)	202356834F	NOVELTY - The wave energy converter (1) for converting energy of ocean waves into electricity has two bodies that are attached to each other. The buoyant body (2) is moored to the seabed, and the fully submerged body (4) is suspended from the buoyant body by vertical suspender cables, chains, ropes, other flexible lines (3), or a rigid frame. The submerged body is placed at a depth, where the wat…	Q54 (Non-positive displacement fluid engines (i.e. driven by fluid); Miscellaneous motors and machines for producing mechanical power/thrust (F03B,D,G,H)); X15 (Non-Fossil Fuel Power Generating Systems)	Q54-X; X15-C01	F03B-013/14; F03B-013/18	US2023160362-A1 25 May 2023 F03B-013/18 202348 English	US2023160362-A1 US093934 06 Jan 2023	US093934 06 Jan 2023	DIIDW:202356834F
251	P	WO2023272861-A1; CN115539285-A; AU2021453295-A1	Wave energy conversion device, has shell provided with water inlet cavity and water outlet cavity, where shell is provided with inlet and outlet at V-shaped opening, and upper part of water turbine is connected with main shaft of generator.	HAN L	HANN-OCEAN ENERGY TECHNOLOGY & EQUIP NAN (HANN-Non-standard)	202302913Y	NOVELTY - The device has a housing. A water inlet cavity and a water outlet cavity are provided in the housing, and a one-way flow guide grille is mounted on an opening of each of the two cavities. A water turbine is mounted between the two cavities. An upper portion of the water turbine is connected to a main shaft of a permanent magnet generator. The one-way flow guide grilles of the water inle…	Q54 (Non-positive displacement fluid engines (i.e. driven by fluid); Miscellaneous motors and machines for producing mechanical power/thrust (F03B,D,G,H)); X11 (Power Generation and High Power Machines); X15 (Non-Fossil Fuel Power Generating Systems)	Q54-A05; Q54-X; X11-B01; X15-C01	F03B-013/22; F03B-003/16; F03B-003/18	WO2023272861-A1 05 Jan 2023 F03B-013/22 202306 Pages: 24 Chinese	WO2023272861-A1 WOCN109454 30 Jul 2021	CN10733209 29 Jun 2021	DIIDW:202302913Y
252	P	US2019040840-A1; WO2019217475-A1; WO2019217485-A1; US10788010-B2; EP3790793-A1; EP3790793-A4; EP3790793-B1	Wave energy converting device for converting the energy of water waves into electrical power, comprises a float that has a buoyant float body with a center of buoyancy, where a base has a frame with a base pivot point.	ROHRER J W	ROHRER TECHNOLOGIES INC (ROHR-Non-standard)	201913809T	NOVELTY - The wave energy converting device comprises a float (4) that has a buoyant float body with a center of buoyancy, where a base has a frame with a base pivot point, to which the float is movably connected by a drive arm (51). The elongated mooring beam (107) is rigidly connected to the frame, which extends and pivotably connected in a horizontal or vertical plane. The power take-off appar…	Q54 (Non-positive displacement fluid engines (i.e. driven by fluid); Miscellaneous motors and machines for producing mechanical power/thrust (F03B,D,G,H)); X15 (Non-Fossil Fuel Power Generating Systems)	Q54-X; X15-C01	F03B-013/10; F03B-013/18; B63B-039/00; F03B-013/12; F03B-013/14; H02K-007/00; F03B-013/20; B63B-035/44; H02K-007/18	US2019040840-A1 07 Feb 2019 F03B-013/18 201913 Pages: 21 English	US2019040840-A1 US153688 05 Oct 2018	US506680 08 May 2012	DIIDW:201913809T
253	P	GB2504682-A; GB2504682-B	Wave energy converter of wave energy system, has ports which are provided with corresponding port angels that are progressively larger or smaller as ports of progressively greater depth, relative to first direction.	SOLHEIM G A	HAVKRAFT AS (HAVK-Non-standard)	2014C85026	NOVELTY - The wave energy converter (10) has columns (20a-20d) which are provided in fluidic communication through corresponding ports (50a-50d) to ocean waves received at converter main portion. The ports are arranged in series along wave propagation direction (40). The columns are arranged so that elongate axes of column are aligned along first direction. The ports are provided with correspondi…	Q54 (Non-positive displacement fluid engines (i.e. driven by fluid); Miscellaneous motors and machines for producing mechanical power/thrust (F03B,D,G,H)); X15 (Non-Fossil Fuel Power Generating Systems)	X15-B01A; X15-B03; X15-C01	F03B-013/14	GB2504682-A 12 Feb 2014 F03B-013/14 201412 Pages: 45 English	GB2504682-A GB013884 04 Aug 2012	GB013884 04 Aug 2012	DIIDW:2014C85026
254	P	IN202041055322-A	Beams for supporting sea wave energy conversion devices, has electrical or hydraulic power generation device that is connected to sea waves energy conversion devices for converting energy of sea waves into electrical or hydraulic energy.	VOORADI R P	VOORADI R P (VOOR-Individual)	202101988J	NOVELTY - The beams has long beams (10) that is provided for holding sea-wave energy conversion devices. An anchoring tie wires is connected to unit for holding and supporting long beam's supporting unit to bed level of sea, or to nearby elevated objects (20). The sea waves energy conversion devices are held and supported by long beam for conversion of energy of sea waves into dynamic energy or i…	Q54 (Non-positive displacement fluid engines (i.e. driven by fluid); Miscellaneous motors and machines for producing mechanical power/thrust (F03B,D,G,H)); X11 (Power Generation and High Power Machines); X15 (Non-Fossil Fuel Power Generating Systems)	Q54-X; X11-B; X11-J07; X15-C01A	F03B-013/18	IN202041055322-A 25 Dec 2020 F03B-013/18 202105 Pages: 63 English	IN202041055322-A IN41055322 18 Dec 2020	IN41055322 18 Dec 2020	DIIDW:202101988J
255	P	CN106894943-A	Hydraulic matching system wave energy generating device, has wave energy generating platform arranged on gear box, and single-way valve whose oil port is connected with hydraulic power generating module through high pressure oil out pipe.	FENG H	UNIV WUHAN TECHNOLOGY (UYWL-C)	2017454345	NOVELTY - The device has a hydraulic power generating module (1) for generating electric energy to a power grid system of a grid-connected module (2). A wave energy conversion module (3) is provided with a wave power generating platform that is arranged on a floater. The floater is hinged with a rack that is connected with the wave energy generating platform. The wave energy generating platform i…	Q54 (Non-positive displacement fluid engines (i.e. driven by fluid); Miscellaneous motors and machines for producing mechanical power/thrust (F03B,D,G,H)); Q57 (Fluid-pressure actuators; hydraulic/pneumatics in general (F15)); X15 (Non-Fossil Fuel Power Generating Systems)	Q54-X; Q57-B; X15-C01	F03B-013/16; F15B-021/08	CN106894943-A 27 Jun 2017 F03B-013/16 201758 Pages: 10 Chinese	CN106894943-A CN10271001 24 Apr 2017	CN10271001 24 Apr 2017	DIIDW:2017454345
256	P	CN102287313-A; CN102287313-B	Transition wave impeller type wave energy conversion device for different terrains and sea condition, has impeller shell wall embedded to prevent rotation of impeller at reverse direction check device under outlet of wedge contraction.	LI D	UNIV TIANJIN (UTIJ-C)	2012A51130	NOVELTY - The device has a base fixed on an impeller shell at a shore base. The impeller shell is installed on a wheel shaft. The impeller shell is connected with a wedge-shaped shrinking channel facing to one side of an inclined part. An inclined lower part of the impeller shell is connected with a water outlet pipeline of the shrinking channel. A water discharging pipeline is connected with an …	Q54 (Non-positive displacement fluid engines (i.e. driven by fluid); Miscellaneous motors and machines for producing mechanical power/thrust (F03B,D,G,H)); X15 (Non-Fossil Fuel Power Generating Systems)	X15-C01	F03B-013/18; F03B-003/12	CN102287313-A 21 Dec 2011 F03B-013/18 201207 Pages: 8 Chinese	CN102287313-A CN10215221 29 Jul 2011	CN10215221 29 Jul 2011	DIIDW:2012A51130
257	P	CN117803516-A	Energy capturing device for wave energy conversion, has conversion device that converts movement of wave in vertical direction into mechanical one-way rotary movement, and generating device converts mechanical energy into electric energy.	LI Z	UNIV SHANGHAI (USHN-C)	202438172F	NOVELTY - The device has a conversion device (3) whose bottom part is provided with a power generation device The conversion device and the power generating device are sleeved with a shell. A top part of the shell is formed with an opening (5), where the top of the conversion device is passed through the opening and is connected with a floater (1). A conversion device is converted movement of a w…	Q54 (Non-positive displacement fluid engines (i.e. driven by fluid); Miscellaneous motors and machines for producing mechanical power/thrust (F03B,D,G,H)); V06 (Electromechanical Transducers and Small Machines); X15 (Non-Fossil Fuel Power Generating Systems); X11 (Power Generation and High Power Machines)	Q54-X; V06-M10; X15-C01; X11-B01; X11-J05B; X11-J05X	F03B-011/02; F03B-013/18; H02K-007/06; H02K-007/18	CN117803516-A 02 Apr 2024 F03B-013/18 202433 Chinese	CN117803516-A CN10015140 04 Jan 2024	CN10015140 04 Jan 2024	DIIDW:202438172F
258	P	CN109256983-A	Wave type piezoelectric wave energy conversion device, has damping plate connected with compression spring, base matched with rectangular groove, linkage device and generating device arranged on floating damping plate.	LIU M	UNIV HARBIN ENGINEERING (UHEG-C)	2019103151	NOVELTY - The device has a floating device provided with a wave energy capturing device, a coupling device and a generating device, where the wave energy capturing device is fixed with a swash plate (1). The swash plate is provided with a shaft seat (2), where the floating device comprises a floating damping plate (11) and a shaft (13) and a compression spring (14). The damping plate is connected…	Q54 (Non-positive displacement fluid engines (i.e. driven by fluid); Miscellaneous motors and machines for producing mechanical power/thrust (F03B,D,G,H)); V06 (Electromechanical Transducers and Small Machines); X15 (Non-Fossil Fuel Power Generating Systems)	Q54-X; V06-M06D; V06-U04B; V06-V01E; X15-C01	F03B-013/16; H02N-002/18	CN109256983-A 22 Jan 2019 H02N-002/18 201925 Pages: 8 Chinese	CN109256983-A CN10966655 23 Aug 2018	CN10966655 23 Aug 2018	DIIDW:2019103151
259	P	CN106545458-A; CN106545458-B	Bottom array hinged swing-type wave energy conversion device, has generator whose two sides are respectively fixed with two sides of rack, and cover plate provided with chute part that is fixed with lower end of stop device.	LIU H	UNIV HARBIN ENGINEERING (UHEG-C)	201722888J	NOVELTY - The device has an annular floating part installed on a guide rail that is fixed on an end of a guide rail. The guide rail is connected with a cover plate that is installed on the annular floating part and an end of an inverted U-shaped connecting rod. The inverted U-shaped connecting rod is fixedly connected with an upper end of a rack. A generator is installed on the cover plate. A gea…	Q54 (Non-positive displacement fluid engines (i.e. driven by fluid); Miscellaneous motors and machines for producing mechanical power/thrust (F03B,D,G,H)); X15 (Non-Fossil Fuel Power Generating Systems)	Q54-X; X15-C01	F03B-013/14	CN106545458-A 29 Mar 2017 F03B-013/14 201726 Pages: 9 Chinese	CN106545458-A CN11055659 25 Nov 2016	CN11055659 25 Nov 2016	DIIDW:201722888J
260	P	WO2013029012-A1	Wave-energy-conversion device has power-takeoff (PTO) subsystems which provide data describing performance of individual PTO subsystem to controller controlling damping force applied by PTO subsystems to oscillating substructure.	STABY P W	RESOLUTE MARINE ENERGY INC (RESO-Non-standard)	2013C73017	NOVELTY - The wave-energy-conversion device (100) has a primary oscillating substructure (101) which oscillates in response to motion of water internal to waves propagating on surface of portion of water. The primary oscillating substructure is attached to PTO subsystems which provide data describing the performance of individual PTO subsystem to a common controller (106) which controls a damping…	Q54 (Non-positive displacement fluid engines (i.e. driven by fluid); Miscellaneous motors and machines for producing mechanical power/thrust (F03B,D,G,H)); T01 (Digital Computers); X15 (Non-Fossil Fuel Power Generating Systems)	T01-J04; X15-C02; X15-C03	F03B-013/26	WO2013029012-A1 28 Feb 2013 F03B-013/26 201318 Pages: 36 English	WO2013029012-A1 WOUS052357 24 Aug 2012	US527219P 25 Aug 2011	DIIDW:2013C73017
261	P	WO2010067177-A2; WO2010067177-A3; EP2358993-A2; AU2009326019-B2; US2011225965-A1; AU2009326019-A1; ZA201103472-A; EP2358993-A4	Wave energy convertor, has elongate construction extending from bed of body of water to above high water level with openings of chambers being located below low water level of body of water.	RETIEF G D F	UNIV STELLENBOSCH (USTL-C)	2010G84618	NOVELTY - The convertor (1) has an elongate construction (2) located in a body of water having wave action. A set of equally spaced chambers (20) extends along a length of the construction. Each chamber communicates through unidirectional valves (40, 42) to a high pressure conduit (44) and a low pressure conduit (46) that communicates with an outlet from a turbine. The construction extends from a…	Q54 (Non-positive displacement fluid engines (i.e. driven by fluid); Miscellaneous motors and machines for producing mechanical power/thrust (F03B,D,G,H)); X15 (Non-Fossil Fuel Power Generating Systems)	X15-C01	F03B-013/14; F03B-013/12; F03B-013/18; F03B-000/00	WO2010067177-A2 17 Jun 2010 F03B-013/14 201041 Pages: 16 English	WO2010067177-A2 WOIB007682 09 Dec 2009	ZA010446 10 Dec 2008	DIIDW:2010G84618
262	P	CN8705209-A	Wave energy converting device - has wave guide ring, and floating cylinder with spring blades.	SUN Y	SUN YANMING (SUNY-Individual)	1989340377		Q55 (Positive displacement fluid machines/pumps/compressors (i.e. for driving fluid) (F04B,C)); X15 (Non-Fossil Fuel Power Generating Systems)	X15-C01	F03B-013/14	CN8705209-A 07 Dec 1988 198947 Pages: 4	CN8705209-A CN105209 27 Jul 1987	CN105209 27 Jul 1987	DIIDW:1989340377
263	P	CN103921902-A; CN103921902-B	Wrecker wave energy conversion power supply device, has floating device connected with ship body by transmission pole, swinging arm formed with front opening, and seal box connected with transmission belt.	HAN Y	STATE GRID CORP CHINA (SGCC-C)	2014S25202	NOVELTY - The device has a floating device connected with a ship body by a transmission pole. The floating device is fixed with a gear transmission device that is fixed with the ship body. An output end of the gear transmission device is equipped with an energy storage device. A swinging arm is formed with a front opening that is matched with the ship body. A seal box is connected with a transmis…	Q24 (Ships; waterborne vessels; related equipment (B63)); Q54 (Non-positive displacement fluid engines (i.e. driven by fluid); Miscellaneous motors and machines for producing mechanical power/thrust (F03B,D,G,H)); X15 (Non-Fossil Fuel Power Generating Systems)	Q24-A; Q24-E03A; Q24-P06; X15-C01	B63B-035/32; F03B-013/14	CN103921902-A 16 Jul 2014 B63B-035/32 201467 Chinese	CN103921902-A CN10171852 25 Apr 2014	CN10171852 25 Apr 2014	DIIDW:2014S25202
264	P	CN201650570-U	Sea wave energy conversion device, has main floating box and auxiliary floating box connected via two connecting rods, and multiple drawing hydraulic pumps arranged on connection parts of main and auxiliary floating boxes and rods.	WU S	WU S (WUSS-Individual)	2010Q71769	NOVELTY - The device has a main floating box and an auxiliary floating box connected via two connecting rods. Connection parts of the boxes are movably connected via a hinge or bearing. Drawing hydraulic pumps are arranged on the connection parts of the boxes and the connecting rods, where each connection rod is Z-shaped or L-shaped metal cylinder or a quadrate metal body. A mast is vertically fi…	Q54 (Non-positive displacement fluid engines (i.e. driven by fluid); Miscellaneous motors and machines for producing mechanical power/thrust (F03B,D,G,H)); X15 (Non-Fossil Fuel Power Generating Systems)	X15-C01C	F03B-013/00; F03B-013/16	CN201650570-U 24 Nov 2010 F03B-013/16 201110 Pages: 5 Chinese	CN201650570-U CN20032904 11 Jan 2010	CN20032904 11 Jan 2010	DIIDW:2010Q71769
265	P	CN215719200-U	Deformable multifunctional wave energy conversion device for use in sea, has control system for transmitting data of point absorption type wave energy generating device, main power system, auxiliary power system and weight adjusting system.	ZHOU X	ZHOU X (ZHOU-Individual)	2022257488	NOVELTY - The utility model belongs to the technical field of sea wave energy generating device, specifically claims a deformable multifunctional wave energy conversion device, comprising a point absorption type wave energy generating device; a main power system, for driving the point absorption wave energy generating device to move; an auxiliary power system, when the point absorption type wave …	Q54 (Non-positive displacement fluid engines (i.e. driven by fluid); Miscellaneous motors and machines for producing mechanical power/thrust (F03B,D,G,H)); X15 (Non-Fossil Fuel Power Generating Systems)	Q54-X; X15-C03; X15-C01A1	F03B-013/14	CN215719200-U 01 Feb 2022 F03B-013/14 202220 Chinese	CN215719200-U CN22245692 16 Sep 2021	CN22245692 16 Sep 2021	DIIDW:2022257488
266	P	RU2689713-C1	DEVICE FOR EVALUATION OF WAVE FORCES ACTING ON WAVE POWER CONVERTER OF COASTAL WAVE-ENERGY COMPLEX, AND EVALUATION OF EFFICIENCY OF WAVE ENERGY CONVERSION INTO USEFUL WORK.	EGURNOV V E	GIDROENERGOSPETSSTROY SCI PROD ASSOC CO (GIDR-Non-standard)	2019591617	NOVELTY - Invention relates to means of testing hydraulic structures intended for power generation, which enables to estimate wave forces and efficiency of wave energy conversion into useful operation. Device comprises support 1 on posts, connected to frame 2 installed inclined relative to support posts, and connected to it by means of main strain gauges 3. On frame 2 with possibility of movement…	Q42 (Hydraulic engineering, soil shifting and sewerage (E02, 3)); Q54 (Non-positive displacement fluid engines (i.e. driven by fluid); Miscellaneous motors and machines for producing mechanical power/thrust (F03B,D,G,H)); X11 (Power Generation and High Power Machines); X15 (Non-Fossil Fuel Power Generating Systems)	Q42-A03; Q54-X; X11-B; X15-C01; X15-C03	E02B-009/00; F03B-013/14	RU2689713-C1 28 May 2019 E02B-009/00 201954 Pages: 1 Russian	RU2689713-C1 RU125033 09 Jul 2018	RU125033 09 Jul 2018	DIIDW:2019591617
267	P	CN108412680-A; CN207920767-U	Wave energy conversion device installed on seabed for converting kinetic energy generated by motions of ocean into electrical energy, has turbine whose output is connected to input of generator through connecting shaft.	ZHANG H	UNIV ZHEJIANG OCEAN (UYZO-C)	2018664878	NOVELTY - The device has a cavity that is arranged in a main housing (4) whose lower portion is provided with a water inlet communicating with the cavity. The top of the main housing is provided with a water outlet communicating with the cavity. The diameter of the water inlet is smaller than the diameter of the water outlet. A turbine (3) and a generator (6) are arranged in the cavity. The outpu…	Q54 (Non-positive displacement fluid engines (i.e. driven by fluid); Miscellaneous motors and machines for producing mechanical power/thrust (F03B,D,G,H)); X15 (Non-Fossil Fuel Power Generating Systems)	Q54-X; X15-C01	F03B-013/22	CN108412680-A 17 Aug 2018 F03B-013/22 201859 Pages: 7 Chinese	CN108412680-A CN10203444 13 Mar 2018	CN10203444 13 Mar 2018	DIIDW:2018664878
268	P	WO2013019214-A1	Submerged wave energy converter apparatus for use on floor of e.g. ocean for harvesting fluid waves energy to produce electricity, has energy-conversion device activated by movement of oscillating fluid column.	DELOS-REYES M	OREGON ENERGY INNOVATIONS LLC (OREG-Non-standard)	2013B91450	NOVELTY - The apparatus (13) has an oscillating fluid column located under water and discrete from wave fluid. An energy-conversion device (3) i.e. turbine, is activated by movement of the fluid column, where separate ends of the apparatus contain prime movers (1) i.e. deformable devices, which convert underwater pressure gradients into pressure gradients within the fluid column. The prime movers…	Q54 (Non-positive displacement fluid engines (i.e. driven by fluid); Miscellaneous motors and machines for producing mechanical power/thrust (F03B,D,G,H)); X15 (Non-Fossil Fuel Power Generating Systems)	X15-C01	F03B-013/12	WO2013019214-A1 07 Feb 2013 F03B-013/12 201313 Pages: 13 English	WO2013019214-A1 WOUS046222 02 Aug 2011	WOUS046222 02 Aug 2011	DIIDW:2013B91450
269	P	WO2010049708-A2; WO2010049708-A3; GB2476778-A	Wave energy conversion device for use in relatively shallow water, has biasing mass, provided in lower portion of flap, which is located below pivot axis to provide restoring force that biases flap to vertical when flap oscillates.	WHITTAKER T J	AQUAMARINE POWER LTD (AQUA-Non-standard)	2010E89520	NOVELTY - A wave energy conversion device (1) includes a base (2) to be anchored to the bed (5) of a body of water and a generally rectangular flap (6) pivotally connected to the base and biased to the vertical. The flap includes an upper portion (8) upstanding above a pivot axis (7) to extract energy from wave motion and a lower portion (10) with a biasing mass located below the pivot axis. The …	Q54 (Non-positive displacement fluid engines (i.e. driven by fluid); Miscellaneous motors and machines for producing mechanical power/thrust (F03B,D,G,H)); X15 (Non-Fossil Fuel Power Generating Systems)	X15-C01	F03B-013/18	WO2010049708-A2 06 May 2010 F03B-013/18 201031 Pages: 47 English	WO2010049708-A2 WOGB002594 30 Oct 2009	GB020021 31 Oct 2008	DIIDW:2010E89520
270	P	NO202001375-A; NO346358-B1; GB2603042-A	Floating housing energy converter unit.	HASLE O M	HASLE O M (HASL-Individual)	202284072D	NOVELTY - The floating wave energy converter has buoys with buoyancy elements (1) which move up and down along a pipe column (2) which is fastened to a common submerged base construction (3). A generator force transmission strut is fastened to an electromagnetic device locked to the electromagnetic force field provided by an electromagnetic device on the buoyancy element such that the movement fr…	Q54 (Non-positive displacement fluid engines (i.e. driven by fluid); Miscellaneous motors and machines for producing mechanical power/thrust (F03B,D,G,H)); V06 (Electromechanical Transducers and Small Machines); X11 (Power Generation and High Power Machines); X15 (Non-Fossil Fuel Power Generating Systems)	Q54-X; V06-M10; X11-B; X11-J05B; X15-C01	F03B-013/18; H02K-007/18; F03B-013/14; F03B-013/16	NO202001375-A 30 May 2022 F03B-013/18 202265 Pages: 1 Portuguese	NO202001375-A NO001375 15 Dec 2020	NO001375 15 Dec 2020	DIIDW:202284072D
271	P	CN112343756-A; CN213743815-U; US2022162986-A1; US11585315-B2	External hollow structure integrated off-shore oscillating water column wave energy conversion device, has air hole channel connected with turbine generating system, where generating system is provided with air turbine and generating unit.	NING D	UNIV DALIAN TECHNOLOGY (UYDA-C)	2021175813	NOVELTY - The device has an oscillating water column provided with an air chamber (6), an inner cylinder (1) and a turbine generating system (4). The air chamber is provided with an outer cylindrical ring body (2) and a hemispherical ring body (3). The hemispherical ring body is inverted on the outer cylindrical ring body. A central position of a top end of the hemispherical ring body is provided…	Q24 (Ships; waterborne vessels; related equipment (B63)); Q52 (Reaction engines: external combustion; gas turbines; rockets (F01D, F02C, F02K, F02M)); Q54 (Non-positive displacement fluid engines (i.e. driven by fluid); Miscellaneous motors and machines for producing mechanical power/thrust (F03B,D,G,H)); X15 (Non-Fossil Fuel Power Generating Systems)	Q24-C05; Q52-A; Q54-X; X15-C01B2	B63B-021/20; F01D-015/10; F03B-013/14; F03B-013/24; F02C-001/02; F03B-017/00	CN112343756-A 09 Feb 2021 F03B-013/14 202118 Pages: 7 Chinese	CN112343756-A CN11316682 20 Nov 2020	CN11316682 20 Nov 2020	DIIDW:2021175813
272	P	CN110469450-A; CN210769129-U	Wave energy conversion device has point absorption device system which is placed in oscillating water column system, and connected to main power generation mechanism through top end of upper traction rope.	JIANG S	UNIV DALIAN TECHNOLOGY (UYDA-C)	201998982S	NOVELTY - The wave energy conversion device has a point absorption device which is provided with an oscillating water column system and a point absorption device system. The point absorption device system includes a submarine spring, a lower traction rope (6a), a floater (5), and an upper traction rope (6b) which is connected in order from bottom to top. An end of the oscillating water column sys…	Q54 (Non-positive displacement fluid engines (i.e. driven by fluid); Miscellaneous motors and machines for producing mechanical power/thrust (F03B,D,G,H)); X11 (Power Generation and High Power Machines); X15 (Non-Fossil Fuel Power Generating Systems)	Q54-X; X11-B; X15-C01	F03B-013/18; F03B-013/24	CN110469450-A 19 Nov 2019 F03B-013/24 201996 Pages: 7 Chinese	CN110469450-A CN10851336 10 Sep 2019	CN10851336 10 Sep 2019	DIIDW:201998982S
273	P	GB2522695-A; WO2015113777-A1; AU2015213123-A1; US2016333847-A1; EP3102819-A1; AU2015213123-B2; AU2015213123-C1; US10400741-B2; EP3102819-B1	Dynamic tuning device for wave energy converter, has submerged vessel, to which buoyant body is rigidly attached, having geometry which is dynamically varied such that volume enclosed by vessel is dynamically varied.	GREGORY B	GREGORY B (GREG-Individual)	201544103W	NOVELTY - The dynamic tuning device has a buoyant body (10) arranged to oscillate under the influence of ocean swell. The buoyant body is rigidly attached to a submerged vessel in form of an open-ended vertical cylinder (17) or tetrahedral inertial trap. The vessel encloses a volume that is arranged to be always full of water, and has a geometry that is dynamically varied such that the volume is …	Q54 (Non-positive displacement fluid engines (i.e. driven by fluid); Miscellaneous motors and machines for producing mechanical power/thrust (F03B,D,G,H)); X15 (Non-Fossil Fuel Power Generating Systems)	X15-C01	F03B-013/18; F03B-013/20; F03B-015/00	GB2522695-A 05 Aug 2015 F03B-013/18 201553 Pages: 37 English	GB2522695-A GB001820 03 Feb 2014	GB001820 03 Feb 2014	DIIDW:201544103W
274	P	US2022099064-A1; US11879421-B2	Energy farm for buoyant wave energy converters, has electrical cables configured to interconnect motion-to-energy converters to communicate electrical energy generated at motion-to-energy converters to power consumer.	SHELDON-COULSON G A	LONE GULL HOLDINGS LTD (LONE-Non-standard)	202246022S	NOVELTY - The farm has a set of motion-to-energy converters adapted to float at an upper surface of a body of water. A set of flexible mooring connectors is configured to interconnect the motion-to-energy converters, and to a power consumer e.g. floating computer data center, floating chemical-fuel-production apparatus, autonomous vessel, manned vessel, chemical-processing apparatus. A set of ele…	Q54 (Non-positive displacement fluid engines (i.e. driven by fluid); Miscellaneous motors and machines for producing mechanical power/thrust (F03B,D,G,H)); T01 (Digital Computers); X15 (Non-Fossil Fuel Power Generating Systems)	Q54-X; T01-L03; X15-C01A1; X15-B06; X15-B01A	F03B-013/18	US2022099064-A1 31 Mar 2022 F03B-013/18 202229 English	US2022099064-A1 US548462 10 Dec 2021	US473361P 18 Mar 2017	DIIDW:202246022S
275	P	CN217926139-U	Wave energy ocean current energy generating device, has connecting piece whose end is fixedly connected with floating platform, and another end is rotatably connected with generating device such that generating device rotates relative to piece.	FANG X	GUANGZHOU MARINE GEOLOGICAL SURVEY (CGSU-C)	2022F1184V	NOVELTY - The utility model claims a wave energy ocean current energy generating device, comprising a floating platform, a connecting piece, ocean current energy generating device and at least one duck-type wave energy conversion device, each duck-type wave energy conversion device is fixed around the edge of the floating platform, the duck-type wave energy conversion device is used for convertin…	Q54 (Non-positive displacement fluid engines (i.e. driven by fluid); Miscellaneous motors and machines for producing mechanical power/thrust (F03B,D,G,H)); X15 (Non-Fossil Fuel Power Generating Systems)	Q54-X; X15-C01A1	F03B-013/16; F03B-013/22	CN217926139-U 29 Nov 2022 F03B-013/22 202299 Chinese	CN217926139-U CN21796644 13 Jul 2022	CN21796644 13 Jul 2022	DIIDW:2022F1184V
276	P	CN109812375-A	Oscillating float-type wave energy converting device, has floater located in air pump chamber, air channel connected with upper cavity, air inlet pipe valve fixed with inner side of lower cavity, and valves fixed with cavity.	CHEN M	UNIV WUHAN TECHNOLOGY (UYWL-C)	201948753T	NOVELTY - The device has a power take-off (PTO) device fixed with a single energy conversion device and a power device. The single energy conversion device is fixed with an air pump chamber and a piston that is fixed with the air pump chamber. The air pump chamber is divided into a lower cavity and an upper cavity. A floater is located in the air pump chamber and connected with the piston through…	Q54 (Non-positive displacement fluid engines (i.e. driven by fluid); Miscellaneous motors and machines for producing mechanical power/thrust (F03B,D,G,H)); X15 (Non-Fossil Fuel Power Generating Systems)	Q54-X; X15-C01	F03B-013/16; F03B-013/18; F03B-013/24	CN109812375-A 28 May 2019 F03B-013/16 201943 Pages: 8 Chinese	CN109812375-A CN10138828 25 Feb 2019	CN10138828 25 Feb 2019	DIIDW:201948753T
277	P	US2010308589-A1	Wave energy converting device for extracting energy from water body, has depth and location fixing unit for holding containers in fixed surfaces at relatively fixed depth relative to sea bed or wave trough average level.	ROHRER J W	ROHRER TECHNOLOGIES INC (ROHR-Non-standard)	2010Q10320	NOVELTY - The device has submerged gas tight containers (4) under hydrostatic pressure holding a gas under atmospheric or moderate pressure or partial vacuum. A hydraulic, pneumatic, mechanical or electrical return unit returns the containers from a decreased volume compressed position to an increased volume expanded position. A depth and location fixing unit holds the containers in fixed surface…	A88 (Mechanical engineering and tools e.g. valves, gears and conveyor belts.); Q54 (Non-positive displacement fluid engines (i.e. driven by fluid); Miscellaneous motors and machines for producing mechanical power/thrust (F03B,D,G,H)); X15 (Non-Fossil Fuel Power Generating Systems)	A12-H; X15-C01	F03B-013/18	US2010308589-A1 09 Dec 2010 F03B-013/18 201082 Pages: 21 English	US2010308589-A1 US800981 27 May 2010	US454984 27 May 2009	DIIDW:2010Q10320
278	P	CN116104680-A	Wave energy converter based on swinging and linear generating device, has shock absorbing device that is fixedly arranged on swing type power generating device, and top of swing type generating device is provided with safety transmission device.	LI D	UNIV ZHEJIANG OCEAN (UYZO-C)	202353499G	NOVELTY - The converter has a mooring anchor chain (11) that is used for mooring a floating platform (1) on the seabed. The floating platform is provided with a power generation assembly. The power generating device comprises a linear power generating assembly, a sealing device (22), a swinging power generating device (23) and a shock absorbing device. The number of linear power generation compon…	Q54 (Non-positive displacement fluid engines (i.e. driven by fluid); Miscellaneous motors and machines for producing mechanical power/thrust (F03B,D,G,H)); X15 (Non-Fossil Fuel Power Generating Systems); X11 (Power Generation and High Power Machines)	Q54-X; X15-C01A1; X11-B	F03B-013/20	CN116104680-A 12 May 2023 F03B-013/20 202347 Chinese	CN116104680-A CN11534543 01 Dec 2022	CN11534543 01 Dec 2022	DIIDW:202353499G
279	P	WO2022200514-A1; EP4314542-A1	Power take-off device for use in wave energy converter unit, has first fluid cylinder whose first end is connected to first end of second fluid cylinder, where second ends of fluid cylinders are connected to buoy and mooring device.	SIDENMARK M	OCEAN HARVESTING TECHNOLOGIES AB (OCEA-Non-standard)	2022C4402A	NOVELTY - The device has a power take-off hull connected to a first mooring device. A power extracting device is connected to the power take off hull and adapted to extract power as a buoy moves with waves by applying predetermined maximum control force. An end-stop cushioning system is provided with a first stage end-stop cushioning device (40) that is provided with a first fluid cylinder, and a…	A88 (Mechanical engineering and tools e.g. valves, gears and conveyor belts.); Q54 (Non-positive displacement fluid engines (i.e. driven by fluid); Miscellaneous motors and machines for producing mechanical power/thrust (F03B,D,G,H)); X15 (Non-Fossil Fuel Power Generating Systems)	A12-H; Q54-X; X15-C01C	F03B-013/18	WO2022200514-A1 29 Sep 2022 F03B-013/18 202281 Pages: 46 English	WO2022200514-A1 WOEP057797 24 Mar 2022	SE050343 24 Mar 2021	DIIDW:2022C4402A
280	P	EP2314864-A2; US2011095534-A1; EP2314864-A3	Wave energy conversion device for generating electricity has turbine and generator arranged at the outlet of the duct for converting energy of water flowing in the duct to electricity such that device is anchored obliquely to wave travel.	HILLMANN M F	WAVE ENERGY DEV LTD (WAVE-Non-standard)	2011E36883	NOVELTY - The wave energy conversion device includes non-return valves and air release valves provided at the delivery ends to allow flow from each wave collector and into a duct without backflow into nearby collectors. A turbine and a generator (4) are arranged at the outlet of the duct for converting energy of water flowing in the duct to electricity such that the device is anchored obliquely t…	Q54 (Non-positive displacement fluid engines (i.e. driven by fluid); Miscellaneous motors and machines for producing mechanical power/thrust (F03B,D,G,H)); X15 (Non-Fossil Fuel Power Generating Systems)	X15-C01	F03B-013/22	EP2314864-A2 27 Apr 2011 F03B-013/22 201129 Pages: 14 English	EP2314864-A2 EP013934 25 Oct 2010	GB018764 26 Oct 2009	DIIDW:2011E36883
281	P	US2010308590-A1; US8581432-B2	Wave energy converting device for producing electrical power from surface waves on water body, has fixing unit including drag plates on spar which in combination with container buoyancy holds containers in fixed surface and at fixed depth.	ROHRER J W	ROHRER J W (ROHR-Individual)	2010Q10421	NOVELTY - The device has submerged gas tight containers set under hydrostatic pressure and holding a gas under atmospheric or moderate pressure or partial vacuum. Hydraulic, pneumatic, mechanical or electrical return unit returns the containers from a decreased volume compressed position to an increased volume expanded position. A depth and location fixing unit includes horizontal drag plates or …	A88 (Mechanical engineering and tools e.g. valves, gears and conveyor belts.); Q54 (Non-positive displacement fluid engines (i.e. driven by fluid); Miscellaneous motors and machines for producing mechanical power/thrust (F03B,D,G,H)); X15 (Non-Fossil Fuel Power Generating Systems)	A12-H; X15-C01	F03B-013/18; F03B-013/10; F03B-013/12	US2010308590-A1 09 Dec 2010 F03B-013/18 201082 Pages: 18 English	US2010308590-A1 US802018 27 May 2010	US454984 27 May 2009	DIIDW:2010Q10421
282	P	CN1036423-A	Wave energy conversion device - has hinge-type water turbine and power generator.	HE X	HE XUESHU (HEXX-Individual)	1990239385		Q42 (Hydraulic engineering, soil shifting and sewerage (E02, 3)); X15 (Non-Fossil Fuel Power Generating Systems)	X15-C01	E02B-009/00	CN1036423-A 18 Oct 1989 E02B-009/00 199032 Chinese	CN1036423-A CN104917 02 Aug 1988	CN104917 02 Aug 1988	DIIDW:1990239385
283	P	RU2540525-C1	Wave energy conversion unit.	CHIZHIUMOV S D	UNIV KOMSOMOLSK ON AMUR TECH (UYKO-Non-standard)	201512137L	NOVELTY - Wave energy conversion unit includes flap 4 swung with waves and having positive buoyancy, horizontal hinges 3, fixed foundation 1, power takeoff device connected to foundation 1. The unit is equipped with vertical frame 2 connected along the lower edge to foundation 1 through horizontal hinges 3, which is also connected to foundation 1 by means of the power takeoff device made in the f…	Q54 (Non-positive displacement fluid engines (i.e. driven by fluid); Miscellaneous motors and machines for producing mechanical power/thrust (F03B,D,G,H)); X15 (Non-Fossil Fuel Power Generating Systems)	X15-C01	F03B-013/18	RU2540525-C1 10 Feb 2015 F03B-013/18 201520 Russian	RU2540525-C1 RU147959 28 Oct 2013	RU147959 28 Oct 2013	DIIDW:201512137L
284	P	PH12009501054-B1	Wave energy converter apparatus has non-floating submerged elements mutually spaced by connection unit so as to assume respective positions affected differently by water motion induced by waves.	GRASSI M	40SOUTH ENERGY LTD (FOUR-Non-standard)	2014M10011	NOVELTY - The apparatus has an energy conversion unit for converting the motion of the connection unit into electric energy. A neutrally buoyant unit is provided for keeping the position of non-floating submerged elements substantially at rest with respect to the surrounding water. The non-floating submerged elements are mutually spaced by the connection unit so as to assume respective positions …	Q54 (Non-positive displacement fluid engines (i.e. driven by fluid); Miscellaneous motors and machines for producing mechanical power/thrust (F03B,D,G,H)); X15 (Non-Fossil Fuel Power Generating Systems)	X15-C01	F03B-013/20	PH12009501054-B1 29 Jan 2013 F03B-013/20 201446 Pages: 1 English	PH12009501054-B1 PH501054 27 May 2009	PH501054 27 May 2009	DIIDW:2014M10011
285	P	RU2016128654-A; RU2661974-C2	Wave energy conversion device, has water-filled tanks rigidly fixed to pendulum, and water supply unit operable for supplying water to tanks and attached with control valves and pipelines that connect water pump to each tank.	CHEBOKSAROV V V	UNIV SEVASTOPOL (UYSE-Non-standard)	201812875F	NOVELTY - The device has a pendulum adapted to swing relative to a floating base along a horizontal axis of the base. An adjusting unit is adapted for adjusting pendulum oscillation period. A pendulum power take-off device interacts with an electric generator, where pendulum oscillation period settings are determined relative to multiple water-filled tanks that are rigidly fixed to the pendulum a…	Q54 (Non-positive displacement fluid engines (i.e. driven by fluid); Miscellaneous motors and machines for producing mechanical power/thrust (F03B,D,G,H)); X15 (Non-Fossil Fuel Power Generating Systems)	Q54-X; X15-C01	F03B-013/20	RU2016128654-A 18 Jan 2018 F03B-013/20 201814 Pages: 1 Russian	RU2016128654-A RU128654 13 Jul 2016	RU128654 13 Jul 2016	DIIDW:201812875F
286	P	CN216788597-U	Sea wave transduction device, has one-way gear for driving output shaft to rotate under driving of input gear and driving rotating direction of output shaft, where output gear and flywheel rotate together with output shaft.	CHEN J	CHEN J (CHEN-Individual)	202285688F	NOVELTY - The utility model model relates to energy utilization technology field, claims a sea wave energy converter, comprising a working platform and a transduction assembly set on the working platform, a transmission assembly and a conversion assembly, the energy conversion assembly converts the unstable sea wave energy into the lever mechanical energy capable of swinging up and down, the tran…	Q54 (Non-positive displacement fluid engines (i.e. driven by fluid); Miscellaneous motors and machines for producing mechanical power/thrust (F03B,D,G,H)); X11 (Power Generation and High Power Machines); X15 (Non-Fossil Fuel Power Generating Systems)	Q54-X; X11-J05; X11-B01; X15-C01	F03B-011/00; F03B-013/14	CN216788597-U 21 Jun 2022 F03B-013/14 202253 Chinese	CN216788597-U CN20076207 12 Jan 2022	CN20076207 12 Jan 2022	DIIDW:202285688F
287	P	CN208057306-U	Swing type wave energy converting device, has main body fixed between first and second swing rods via rotating pair connection, hydraulic rod hinged with piston, and generating device connected with hydraulic device by pipeline.	LI Y	UNIV SHANDONG SCI & TECHNOLOGY (SDST-C)	2018890845	NOVELTY - The utility model claims a swing type wave energy converting device, which solves the problem of tidal and wave energy and other energy into electrical energy, the device comprises a machine frame, a swinging plate, a swinging rod connecting device, a hydraulic device and a generating device, a frame for fixing the device and support rod connection device. the swing connecting device co…	Q54 (Non-positive displacement fluid engines (i.e. driven by fluid); Miscellaneous motors and machines for producing mechanical power/thrust (F03B,D,G,H)); X15 (Non-Fossil Fuel Power Generating Systems)	Q54-X; X15-C01	F03B-013/22	CN208057306-U 06 Nov 2018 F03B-013/22 201877 Pages: 8 Chinese	CN208057306-U CN20376759 20 Mar 2018	CN20376759 20 Mar 2018	DIIDW:2018890845
288	P	CN108590942-A; CN208267997-U; WO2019223771-A1	Marine structure hydraulic control wave energy converting device, has check valve fixed with transverse oil passage, and generator whose rotor for driving rotating center of rotating nozzle to rotate.	YAO X	UNIV JIANGSU SCI & TECHNOLOGY (UYJG-C)	201879431A	NOVELTY - The device has an oil tank connected with a lower part of a transverse oil passage. The transverse oil passage and the oil tank are connected with an oil suction passage. Two sides of a vertical oil channel are formed with a backflow groove. The backflow groove and the oil tank are connected with a reflux channel. An end of a piston rod is vertically connected with a back part of a wave…	Q54 (Non-positive displacement fluid engines (i.e. driven by fluid); Miscellaneous motors and machines for producing mechanical power/thrust (F03B,D,G,H)); X15 (Non-Fossil Fuel Power Generating Systems)	Q54-X; X15-C01; X15-C03	F03B-013/22	CN108590942-A 28 Sep 2018 F03B-013/22 201871 Pages: 10 Chinese	CN108590942-A CN10508149 24 May 2018	CN10508149 24 May 2018	DIIDW:201879431A
289	P	CN108442311-A; CN108442311-B	Movable oscillating water column-type wave energy conversion device for floating wave protection embankment, has anchoring system having anchor chain set at chest portion of bottom plate corner for suction anchoring on bed.	WEI Z	UNIV DALIAN TECHNOLOGY (UYDA-C)	2018685912	NOVELTY - The device comprises floating breakwater modules which are set in elastic connection with each other for realizing independent motion of each module and generate floating breakwater generating pasture, and a single floating breakwater module having a box (1), a power generating device, a connection device and an anchoring system. The position of upper portion of a circular hole is provi…	Q42 (Hydraulic engineering, soil shifting and sewerage (E02, 3)); Q54 (Non-positive displacement fluid engines (i.e. driven by fluid); Miscellaneous motors and machines for producing mechanical power/thrust (F03B,D,G,H)); X15 (Non-Fossil Fuel Power Generating Systems)	Q42-A02D; Q42-D01; Q54-X; X15-C01	E02B-003/06; F03B-011/04; F03B-013/24	CN108442311-A 24 Aug 2018 E02B-003/06 201861 Pages: 8 Chinese	CN108442311-A CN10235431 21 Mar 2018	CN10235431 21 Mar 2018	DIIDW:2018685912
290	P	CN203098134-U	Wave energy converting and collecting working platform, has collecting work platform body provided with hollow rectangular metal welding rod frame, switch connected with wave energy device, and rod bracket provided with transverse rod.	HU Y	HU Y (HUYY-Individual)	2013U01554	NOVELTY - This utility model claims a kind of wave energy converting and collecting working platform, wherein the wave energy converting and collecting work platform (1) comprises a hollow rectangular metal welding rod frame (2), a rod bracket comprises a transverse rod (11) and the lower cross rod (12), a lower transverse rod (12) is provided with a sliding hole, the upper cross rod and the lowe…	Q54 (Non-positive displacement fluid engines (i.e. driven by fluid); Miscellaneous motors and machines for producing mechanical power/thrust (F03B,D,G,H)); X15 (Non-Fossil Fuel Power Generating Systems)	X15-C01	F03B-013/14	CN203098134-U 31 Jul 2013 F03B-013/14 201373 Pages: 5 Chinese	CN203098134-U CN20743146 31 Dec 2012	CN20743146 31 Dec 2012	DIIDW:2013U01554
291	P	RU2447317-C2; RU2010115399-A	Device for electric power generation due to water surface sloshing contains mechanical wave energy converter connected kinematically with electric generator in floated hull.	KUKANKOV S N	STRATEGIC ROCKET FORCES MILITARY ACAD (STRA-Non-standard)	2012E44600	NOVELTY - Device for electric power generation due to water surface sloshing contains mechanical wave energy converter 3 connected kinematically with electric generator 6 in floated hull 2. Device is equipped with potential energy storage unit 4, self-oscillating unit 5 with escapement and gear systems. Mechanical wave energy converter 3 is connected through one gear system to potential energy st…	Q54 (Non-positive displacement fluid engines (i.e. driven by fluid); Miscellaneous motors and machines for producing mechanical power/thrust (F03B,D,G,H)); X11 (Power Generation and High Power Machines); X15 (Non-Fossil Fuel Power Generating Systems)	X11-B; X15-C01	F03B-013/16	RU2447317-C2 10 Apr 2012 201232 Russian	RU2447317-C2 RU115399 20 Apr 2010	RU115399 20 Apr 2010	DIIDW:2012E44600
292	P	US2022307459-A1	Geographically reconfigurable wave-powered computing network for deploying farms of buoyant wave energy converters on surface of e.g. ocean, has automated system for controlling location of converters.	MOFFAT B L	LONE GULL HOLDINGS LTD (LONE-Non-standard)	2022C44717	NOVELTY - The geographically reconfigurable wave-powered computing network has a set of buoyant wave energy converters, and an automated system for controlling a location of the converters (130,137,141,144). A set of propulsion units is in communication with the automated system, where the propulsion units move the network of converters in response to commands from the system. The converters are …	Q54 (Non-positive displacement fluid engines (i.e. driven by fluid); Miscellaneous motors and machines for producing mechanical power/thrust (F03B,D,G,H)); T01 (Digital Computers); X11 (Power Generation and High Power Machines); X15 (Non-Fossil Fuel Power Generating Systems)	Q54-X; Q54-G; T01-J07B; X11-J05X; X11-B; X15-C03; X15-C01A1; X15-B01	F03B-013/14; F03B-013/18; F03B-013/20; F03D-013/10; F03D-013/25; F03D-003/00; F03D-003/06; H02K-007/075	US2022307459-A1 29 Sep 2022 F03B-013/18 202283 English	US2022307459-A1 US841171 15 Jun 2022	US463629P 25 Feb 2017	DIIDW:2022C44717
293	P	CN105736223-A; CN105736223-B	Wave energy converter, has electric generator fixed to sides of ball and connected with rotating shaft through shaft joint, where right side of rotating shaft is fixed with blade and end of rotating shaft is connected with another blade.	TANG Z	UNIV ZHEJIANG OCEAN (UYZO-C)	201643469Q	NOVELTY - The converter has a first hydraulic cylinder (2) mounted on a floating plate (4). A second hydraulic cylinder (6) is installed on a machine base (7). A third hydraulic cylinder (10) is connected with a piston rod that is fixed with a floating ball (17). A pin shaft (11) is installed with a supporting rod (18). Left and right sides of the floating ball are connected with an electric gene…	Q54 (Non-positive displacement fluid engines (i.e. driven by fluid); Miscellaneous motors and machines for producing mechanical power/thrust (F03B,D,G,H)); X15 (Non-Fossil Fuel Power Generating Systems)	Q54-X; X15-C01	F03B-013/16	CN105736223-A 06 Jul 2016 F03B-013/16 201650 Pages: 5 Chinese	CN105736223-A CN10157426 21 Mar 2016	CN10157426 21 Mar 2016	DIIDW:201643469Q
294	P	WO2012143708-A2; GB2490314-A; WO2012143708-A3; EP2699795-A2; CN103492707-A; US2014090365-A1; KR2014040718-A; JP2014511974-W; ZA201308471-A; GB2490314-B; BR112013026673-A2	Apparatus for converting movement of buoyant frame into energy, used in wave energy converter, has energy take-off line which is separated from connecting line to convert movement of buoyant frame into energy.	GRASSI M	MATHCLICK LTD (MATH-Non-standard)	2012N89730	NOVELTY - The apparatus has buoyant (1) which is fully submerged in fluid medium. Buoyant frame is supported in fluid by buoyancy force which is acted in primary direction. A connecting line is configured to connect buoyant frame to a pivot point which is displaced from buoyant frame in the direction in which buoyancy force is acted on buoyant frame. The connecting line connects buoyant frame to …	X15 (Non-Fossil Fuel Power Generating Systems)	X15-C01A1; X15-C01C	H02K-000/00; F03B-013/18; F03D-005/06; F03B-013/14; F03B-013/16; F03B-013/20; F03B-000/00	WO2012143708-A2 26 Oct 2012 201274 Pages: 23 English	WO2012143708-A2 WOGB050845 17 Apr 2012	GB006554 18 Apr 2011	DIIDW:2012N89730
295	P	WO2010140113-A1; EP2438293-A1; IT1394899-B; EP2438293-B1	Wave energy converter system for generating electric energy from wave motion of sea, has electric generating unit having magnets and windings movable around rotor in first and second planes intersecting rotor.	BRACCO G	POLITECNICO DI TORINO (PLOI-C)	2010Q08187	NOVELTY - One between first magnet (14) and first winding (11) of electric generating unit is brought by second frame (12) to rotate around second axis, while other is brought by first frame (7) so that first magnet and first winding are movable with respect to each other around rotor (16) in first plane intersecting rotor. One between second magnet (10) and second winding (17) is brought by firs…	Q54 (Non-positive displacement fluid engines (i.e. driven by fluid); Miscellaneous motors and machines for producing mechanical power/thrust (F03B,D,G,H)); S02 (Engineering Instrumentation); X15 (Non-Fossil Fuel Power Generating Systems)	S02-B07; X15-C01; X15-C03	F03B-013/20; F03G-007/08; G01C-019/02; F03B-000/00	WO2010140113-A1 09 Dec 2010 F03B-013/20 201082 Pages: 28 English	WO2010140113-A1 WOIB052433 01 Jun 2010	ITTO0422 04 Jun 2009	DIIDW:2010Q08187
296	P	CN103266982-A; CN103266982-B	Wave energy conversion gas power generating method, involves generating kinetic energy, driving motor by steam turbine impeller, fixing water inlet with V-shaped shrinking ramp, and providing water inlet with fence.	DONG X	CHINA WATER RESOURCES & HYDRAULIC POWER (IWHR-C)	2013V22887	NOVELTY - The method involves generating kinetic energy. A motor is driven by a steam turbine impeller. Lateral force is generated using an air stream. An air outlet is connected with a water inlet of a vertical tower. A top end part of the vertical tower is provided with an air flow passage that is arranged in the impeller. The water inlet is fixed with a V-shaped shrinking ramp. A top part of a…	Q54 (Non-positive displacement fluid engines (i.e. driven by fluid); Miscellaneous motors and machines for producing mechanical power/thrust (F03B,D,G,H)); X15 (Non-Fossil Fuel Power Generating Systems)	X15-C01	F03B-011/08; F03B-013/24; F03B-003/12	CN103266982-A 28 Aug 2013 F03B-013/24 201377 Pages: 9 Chinese	CN103266982-A CN10202227 28 May 2013	CN10202227 28 May 2013	DIIDW:2013V22887
297	P	US2012080883-A1; US8907513-B2	Wave energy converter of wave energy connector, has variable inductance unit that is provided with secondary magnet to oscillate pendulum relative to primary magnet of variable inductance unit.	HOBDY M	HOBDY M (HOBD-Individual)	2012D95796	NOVELTY - The converter has a pendulum (14) that is positioned in a shell (12). The pendulum is provided with a primary magnet. A variable inductance unit (18) is provided to vary an inductive capacity and is positioned in the shell. The variable inductance unit is provided with secondary magnet to oscillate pendulum relative to the primary magnet of variable inductance unit.	Q54 (Non-positive displacement fluid engines (i.e. driven by fluid); Miscellaneous motors and machines for producing mechanical power/thrust (F03B,D,G,H)); X15 (Non-Fossil Fuel Power Generating Systems)	X15-C01	F03B-013/20; F03G-007/08; H02K-035/02; H02K-007/18	US2012080883-A1 05 Apr 2012 F03B-013/20 201225 Pages: 29 English	US2012080883-A1 US238984 21 Sep 2011	US271743 14 Nov 2008	DIIDW:2012D95796
298	P	RO106281-B1	Wave energy converter producing electricity - has turbogenerator resonator and guide channel, and two curved mobile carriages.	NANU P	NANU P (NANU-Individual)	1994246835		Q55 (Positive displacement fluid machines/pumps/compressors (i.e. for driving fluid) (F04B,C)); X15 (Non-Fossil Fuel Power Generating Systems)		F03B-013/12	RO106281-B1 31 Mar 1993 F03B-013/12 199430	RO106281-B1 RO142043 18 Oct 1989	RO142043 18 Oct 1989	DIIDW:1994246835
299	P	US2019368462-A1; US11009000-B2	Positively buoyant wave energy converter for converting mechanical or hydraulic energy into electrical power, comprises a submerged pod that is rigidly mounted to one of the flotation module and water-conducting tube.	MOFFAT B L	LONE GULL HOLDINGS LTD (LONE-Non-standard)	2019A1642M	NOVELTY - The positively buoyant wave energy converter comprises a water-conducting tube having at least one constriction for accelerating water. A flotation module is rigidly connected to the water-conducting tube having a horizontal cross-sectional area larger than the largest cross-sectional area of the water-conducting tube. A submerged pod is rigidly mounted to one of the flotation module an…	Q54 (Non-positive displacement fluid engines (i.e. driven by fluid); Miscellaneous motors and machines for producing mechanical power/thrust (F03B,D,G,H)); X15 (Non-Fossil Fuel Power Generating Systems)	Q54-X; X15-C01A1	F03B-011/02; F03B-013/10; F03B-013/18; F03B-013/22	US2019368462-A1 05 Dec 2019 F03B-013/22 201995 Pages: 112 English	US2019368462-A1 US544726 19 Aug 2019	US377679P 22 Aug 2016	DIIDW:2019A1642M
300	P	CN111894787-A; CN111894787-B	Full-submersible oscillating water column wave energy conversion machine, has protective tube that is penetrated up and down, and wave power generation assembly which is installed at lower portion of protective tube.	MENG Q	MNR OCEANOGRAPHY SECOND INST (GJHY-C)	2020B2750K	NOVELTY - The machine has a protective pipe (1) that is configured for setting up below a water surface. A protective tube penetrates up and down, and a wave power generation assembly (2) is installed at the lower portion of the protective tube. The wave power assembly is provided with a wells turbine. A fixed column (3) is provided with a vertical anti-falling chute (4). A sliding block is slida…	Q54 (Non-positive displacement fluid engines (i.e. driven by fluid); Miscellaneous motors and machines for producing mechanical power/thrust (F03B,D,G,H)); X11 (Power Generation and High Power Machines); X15 (Non-Fossil Fuel Power Generating Systems)	Q54-X; X11-B01; X15-C01	F03B-011/00; F03B-013/22	CN111894787-A 06 Nov 2020 F03B-013/22 202095 Pages: 14 Chinese	CN111894787-A CN10777463 05 Aug 2020	CN10777463 05 Aug 2020	DIIDW:2020B2750K
301	P	RO106441-B1	Wave energy converter with flywheel - has adjustable rake single rotation direction bladed impeller improving hydrodynamics.	GUTANU M	GUTANU M (GUTA-Individual)	1994261577		Q42 (Hydraulic engineering, soil shifting and sewerage (E02, 3)); Q55 (Positive displacement fluid machines/pumps/compressors (i.e. for driving fluid) (F04B,C)); X15 (Non-Fossil Fuel Power Generating Systems)		E02B-009/08; F03B-013/12	RO106441-B1 30 Apr 1993 F03B-013/12 199432 Pages: 1	RO106441-B1 RO001500 30 Nov 1992	RO001500 30 Nov 1992	DIIDW:1994261577
302	P	IN201841000206-A; IN430483-B	Wave energy converter (WEC) device for extract energy from ocean waves, has rigid rod that connects third magnet to buoy, and rod is configured to transmit wave motion from buoy to chamber for generating electrical output.	SRIVASTAVA A	INDIAN INST TECHNOLOGY MADRAS (IITM-C)	201961523V	NOVELTY - The device has a chamber (120) comprises a first magnet (112) affixed to top portion of the chamber, a second magnet (116) affixed to the bottom portion of the chamber and a third magnet (114). The third magnet is connected to the sides of the chamber via two springs (113, 115) and oscillates between the first and the second magnets to maintain equilibrium. A buoy (110) configured to fl…	Q54 (Non-positive displacement fluid engines (i.e. driven by fluid); Miscellaneous motors and machines for producing mechanical power/thrust (F03B,D,G,H)); X15 (Non-Fossil Fuel Power Generating Systems)	Q54-X; X15-C01	F03B-013/12	IN201841000206-A 05 Jul 2019 F03B-013/12 201956 Pages: 33 English	IN201841000206-A IN41000206 02 Jan 2018	IN41000206 02 Jan 2018	DIIDW:201961523V
303	P	CN109595119-A; CN209818199-U	Vertical floating anti-wave bank based oscillating type wave energy generating device, has oscillating buoy system for passing through rotor floating breakwater, and mooring system connected with lower end of floating breakwater.	ZHOU B	UNIV HARBIN ENGINEERING (UHEG-C)	2019349560	NOVELTY - The device has a generating set located on a floating breakwater. An oscillating buoy system passes through a rotor floating breakwater. A mooring system is connected with a lower end of a floating breakwater. The upper end of the floating breakwater is connected with a working platform. A power device is located on the working platform. A shaft part is located on the oscillating buoy t…	Q42 (Hydraulic engineering, soil shifting and sewerage (E02, 3)); ; V06 (Electromechanical Transducers and Small Machines); X11 (Power Generation and High Power Machines); X15 (Non-Fossil Fuel Power Generating Systems)	Q42-A; Q54-X; V06-M10; X11-B01; X11-J05B; X15-C01A1	E02B-003/06; F03B-013/18; H02K-007/18	CN109595119-A 09 Apr 2019 F03B-013/18 201944 Pages: 9 Chinese	CN109595119-A CN10026648 11 Jan 2019	CN10026648 11 Jan 2019	DIIDW:2019349560
304	P	WO2018158612-A1	Wave energy convertor for converting kinetic energy of ocean wave into electricity, has linear electric generators installed in anchor rods to generate electricity, and guard box or frame acting as support structure for key elements.	MOROVATI SHARIF ABADI M	MOROVATI SHARIF ABADI M (ABAD-Individual)	201870563Q	NOVELTY - The convertor has paddles (1) for capturing incoming waves. A set of chains (2) transmit paddles motion to gears. A drive system or a crankshaft converts horizontal motion of the paddles to reciprocating motion for generating electricity through a linear electric generator. A set of linear electric generators is installed in anchor rods (13) to generate electricity through perpendicular…	Q54 (Non-positive displacement fluid engines (i.e. driven by fluid); Miscellaneous motors and machines for producing mechanical power/thrust (F03B,D,G,H)); X15 (Non-Fossil Fuel Power Generating Systems)	Q54-X; X15-C01	F03B-013/12; F03B-013/18	WO2018158612-A1 07 Sep 2018 F03B-013/18 201862 Pages: 23 English	WO2018158612-A1 WOIB051187 01 Mar 2017	WOIB051187 01 Mar 2017	DIIDW:201870563Q
305	P	CN106050543-A	Floating magnetic liquid wave energy conversion device, has hydraulic cylinder connected to end of ultra-conducting magnet generating passage by first and second one-way valves, and electrode fixed to inner wall of power generating passage.	AN Q	UNIV TIANJIN (UTIJ-C)	201668700Y	NOVELTY - The device has a wave energy capturing floating body whose lower end is connected with a connecting rod. An upper end of the connecting rod is connected with a circular turntable by a rolling bearing. Upper and lower parts of the rolling bearing are respectively connected with a first support plate and a second support plate. A hydraulic cylinder is connected to an end of an ultra-condu…	Q54 (Non-positive displacement fluid engines (i.e. driven by fluid); Miscellaneous motors and machines for producing mechanical power/thrust (F03B,D,G,H)); V06 (Electromechanical Transducers and Small Machines); X11 (Power Generation and High Power Machines); X15 (Non-Fossil Fuel Power Generating Systems)	Q54-X; V06-M06Q; X11-B; X11-H03B1; X15-C01	F03B-013/18; H02K-044/08	CN106050543-A 26 Oct 2016 F03B-013/18 201677 Pages: 10 Chinese	CN106050543-A CN10318483 13 May 2016	CN10318483 13 May 2016	DIIDW:201668700Y
306	P	US11939945-B1	Method for facilitating adaptive control of wave energy converters mounted on structures, involves taking wave condition data as input and to output control parameter values, and implementing selected value of control parameter on wave energy capture system by controller.	BELL N	OCEAN MOTION TECHNOLOGIES INC (OCEA-Non-standard)	202431299H	NOVELTY - The method involves receiving input regarding real-time wave conditions in a vicinity of a wave energy capture system (220) at a controller of the wave energy capture system deployed in a water body. An adjustable-length arm (214) is coupled to the water body by a pivot at a first end of the arm. A floatation device is coupled to a second end of the arm configured to float on water. A m…	Q54 (Non-positive displacement fluid engines (i.e. driven by fluid); Miscellaneous motors and machines for producing mechanical power/thrust (F03B,D,G,H)); T01 (Digital Computers); X15 (Non-Fossil Fuel Power Generating Systems)	Q54-X; T01-J08A; X15-C01; X15-C03	F03B-013/20; F03B-015/00	US11939945-B1 26 Mar 2024 F03B-015/00 202429 English	US11939945-B1 US468615 15 Sep 2023	US383873P 15 Nov 2022	DIIDW:202431299H
307	P	DE102012007942-A1	Wave energy converter for converting mechanical energy of water movement of sea into electrical power, has supporting structure connected to upstream flow body, and polymer stack pressurized with force by periodic movement of flow body.	KAMIZURU Y	BOSCH GMBH ROBERT (BOSC-C)	2013S55837	NOVELTY - The converter (110) has a supporting structure (30) elastically connected to an upstream flow body (10) e.g. buoyancy profile and resistance body, via an electroactive polymer stack. The converter converts a water movement underneath a surface of a water body into a periodic movement of the upstream flow body. The polymer stack is pressurized with a force by the periodic movement of the…	A88 (Mechanical engineering and tools e.g. valves, gears and conveyor belts.); Q54 (Non-positive displacement fluid engines (i.e. driven by fluid); Miscellaneous motors and machines for producing mechanical power/thrust (F03B,D,G,H)); X15 (Non-Fossil Fuel Power Generating Systems)	A12-H; X15-C01	F03B-013/10	DE102012007942-A1 24 Oct 2013 F03B-013/10 201372 Pages: 22 German	DE102012007942-A1 DE10007942 20 Apr 2012	DE10007942 20 Apr 2012	DIIDW:2013S55837
308	P	IN201721021992-A; IN472544-B	Chambered ocean wave energy converter cum breakwater for coastal line, has set of wave energy extraction units located along wave energy extraction chamber of sea water entering wave energy extraction chamber.	RAMAKRISHNAN B	INDIAN INST TECHNOLOGY BOMBAY (IITB-C)	201963486Y	NOVELTY - The breakwater (1) has a durable mechanically strong and weather resistant material oblong structure (2) provided along a coastal line and a wave energy extraction system, where the oblong structure consists of an oblong wave energy extraction chamber (3) including a vertical outer wall (4) facing sea and a vertical inner wall (5) adjoining the coastal line and spaced from the outer wal…	Q54 (Non-positive displacement fluid engines (i.e. driven by fluid); Miscellaneous motors and machines for producing mechanical power/thrust (F03B,D,G,H)); X15 (Non-Fossil Fuel Power Generating Systems)	Q54-X; X15-C01	F03B-013/18	IN201721021992-A 12 Jul 2019 F03B-013/18 201957 Pages: 34 English	IN201721021992-A IN21021992 22 Dec 2017	IN21021992 22 Dec 2017	DIIDW:201963486Y
309	P	US2008012344-A1; WO2008076145-A2; WO2008076145-A3; EP2038546-A2; AU2007334608-A1; CA2652273-A1; JP2009537733-W; US7781903-B2; AU2007334608-B2; JP5153768-B2; CA2652273-C; EP2038546-B1; ES2567628-T3; EP2038546-A4	Wave energy converter for e.g. generating electric power, has cylinder enclosed with inlet port for allowing air to be drawn into cylinder and outlet port for outputting air, and piston within cylinder connected via piston rod.	BUFFARD K	BUFFARD K (BUFF-Individual)	2008B91557	NOVELTY - The converter has a float (1.1) intended to lie along a surface of a body of water and designed to move in-phase with waves. A spar-like element tends to move up and down in a vertical direction. A restraining unit e.g. heave plate (1.7) is attached to the element for increasing the effective mass of a spar. A cylinder (1.5) is enclosed with an inlet port for allowing atmospheric air to…	Q54 (Non-positive displacement fluid engines (i.e. driven by fluid); Miscellaneous motors and machines for producing mechanical power/thrust (F03B,D,G,H)); X15 (Non-Fossil Fuel Power Generating Systems)	X15-C01	F03B-013/12; F03B-013/18; F03B-013/24; F03B-013/10; H02P-009/04; F03B-013/20	US2008012344-A1 17 Jan 2008 F03B-013/12 200814 Pages: 12 English	US2008012344-A1 US803746 16 May 2007	US800696P 16 May 2006	DIIDW:2008B91557
310	P	US2017009732-A1; WO2017015626-A1; GB2557501-A; IN201817006786-A; US10393089-B2; GB2557501-B; GB2584965-A; GB2584965-A8; GB2584965-B; GB2591421-A; GB2594665-A; GB2591421-B; GB2594665-B	Wave energy converter for converting ocean waves into electrical energy, has reaction plate submerged below water surface and comprising moment of inertia in pitch and roll greater than moment of inertia in pitch and roll of surface float.	MUNDON T R	OSCILLA POWER INC (OSCI-Non-standard)	201703416S	NOVELTY - The wave energy converter (100) has a surface float (102) comprising a non-axisymmetric profile. A reaction plate (104) is submerged below a water surface. More than one flexible tether (106), each mechanically coupled to both the surface float and the reaction plate. The reaction plate comprising a moment of inertia in pitch and roll greater than a moment of inertia in pitch and roll o…	Q54 (Non-positive displacement fluid engines (i.e. driven by fluid); Miscellaneous motors and machines for producing mechanical power/thrust (F03B,D,G,H)); ; V06 (Electromechanical Transducers and Small Machines); X11 (Power Generation and High Power Machines); X15 (Non-Fossil Fuel Power Generating Systems)	Q54-X; Q57-A; V06-M04; X11-B; X15-C01	F03B-013/18; F15B-007/02; H02K-035/00; E02B-009/08; F03B-013/12; F03B-013/14; F03B-013/16; F03B-013/20; H02N-002/18; H01L-041/12	US2017009732-A1 12 Jan 2017 F03B-013/18 201707 Pages: 19 English	US2017009732-A1 US217772 22 Jul 2016	US809155P 05 Apr 2013	DIIDW:201703416S
311	P	BR200202390-A	Offshore wave energy conversion electrical generator includes a vertically mobile platform with a raft, and ratchet and pinion gearing.	DE OLIVEIRA P C	DE OLIVEIRA P C (DOLI-Individual)	2004432148		Q55 (Positive displacement fluid machines/pumps/compressors (i.e. for driving fluid) (F04B,C)); X15 (Non-Fossil Fuel Power Generating Systems)	X15-C01	F03G-007/08	BR200202390-A 11 May 2004 F03G-007/08 200441 Pages: 1	BR200202390-A BR002390 14 May 2002	BR002390 14 May 2002	DIIDW:2004432148
312	P	CN113479294-A	Wave energy conversion device used for wave power generation, has main portion which flows out of cylinder structure through first water outlet hole on water outlet section, forming water wheel to rotate during water inlet and drainage process.	LI Y	LI Y (LIYY-Individual)	2021B8900D	NOVELTY - The device has multiple first water inlet holes which are distributed on the circumference of the water inlet section (3). Each first water inlet hole is equipped with a water inlet valve that opens unidirectionally toward the inside of the cylinder, and a ring-shaped baffle is provided at the bottom of the water inlet section. The sea water flows into the cylinder structure through the…	Q24 (Ships; waterborne vessels; related equipment (B63)); Q54 (Non-positive displacement fluid engines (i.e. driven by fluid); Miscellaneous motors and machines for producing mechanical power/thrust (F03B,D,G,H)); X11 (Power Generation and High Power Machines); X15 (Non-Fossil Fuel Power Generating Systems)	Q24-P08; Q54-X; X11-B01; X15-C01A	B63B-035/44; F03B-013/14	CN113479294-A 08 Oct 2021 B63B-035/44 202188 Chinese	CN113479294-A CN10698180 23 Jun 2021	CN10698180 23 Jun 2021	DIIDW:2021B8900D
313	P	CN212690218-U	Wave energy converter, has two racks respectively located at two sides of rotating shaft, and floating body connected with lifting frame to drive lifting frame to move up and down when floating body floats up and down along with wave.	LI J	LI J (LIJJ-Individual)	202130313S	NOVELTY - The utility model claims a wave energy converter, comprising a bracket, a generator set on the bracket, and a floating body floating in the water, further comprising a rotating shaft and a lifting frame; the rotating shaft is rotatably set on the bracket; the rotating shaft is connected with the rotor of the generator; the rotating shaft is provided with two flywheels; the lifting frame…	Q54 (Non-positive displacement fluid engines (i.e. driven by fluid); Miscellaneous motors and machines for producing mechanical power/thrust (F03B,D,G,H)); X15 (Non-Fossil Fuel Power Generating Systems)	Q54-X; X15-C01	F03B-013/18	CN212690218-U 12 Mar 2021 F03B-013/18 202126 Pages: 9 Chinese	CN212690218-U CN20689718 29 Apr 2020	CN20689718 29 Apr 2020	DIIDW:202130313S
314	P	CN112283009-A; CN112283009-B	Floating omnidirectional wave energy collection device has case, magnet and magnetostrictive sheet that are set cooperate with each other to make coil generate induced electromotive force, where coil is connected to electrical equipment.	WU S	UNIV HANGZHOU DIANZI (UYHH-C)	202113211G	NOVELTY - The device has a magnetostrictive cantilever that is located in an energy harvesting housing. The magnetostrictive cantilever beam is set with a magnetostrictive sheet and an induction coil wound around the magnetostrictive sheet. The excitation mechanism is set with a wave energy conversion case and an excitation case extending into the energy collection shell. The waves in any directi…	Q54 (Non-positive displacement fluid engines (i.e. driven by fluid); Miscellaneous motors and machines for producing mechanical power/thrust (F03B,D,G,H)); X15 (Non-Fossil Fuel Power Generating Systems)	Q54-X; X15-C01	F03B-013/14	CN112283009-A 29 Jan 2021 F03B-013/14 202114 Pages: 12 Chinese	CN112283009-A CN11149988 23 Oct 2020	CN11149988 23 Oct 2020	DIIDW:202113211G
315	P	CN210483948-U	nodding duck-type wave generating electricity simulating system, has nodding duck wave energy converting device fixed at end of water storage tank for capturing wave energy in water storage groove and converting wave energy into electric energy.	LI K	BEIJING INST TECHNOLOGY ZHUHAI COLLEGE (BTZH-C)	202041884P	NOVELTY - The utility model claims a nodding duck type wave generate electricity simulating system, comprising a generating device, a wave detecting device and nodding duck wave-energy conversion device, making device comprising a water tank, a driving device and a wave plate; a wave plate vertically set on the first end of water storage tank, and the wave making plate mechanically connected with…	W06 (Aviation, Marine and Radar Systems); X15 (Non-Fossil Fuel Power Generating Systems)	W06-A05D1; X15-C01; X15-C03	F03B-013/22; F04D-035/00; G01S-015/08	CN210483948-U 08 May 2020 F03B-013/22 202040 Pages: 12 Chinese	CN210483948-U CN21080764 10 Jul 2019	CN21080764 10 Jul 2019	DIIDW:202041884P
316	P	GB2490184-A; GB2490184-B; US9657710-B2; US2014117671-A1	Wide range dynamically tunable inertial wave energy converter, has tuning unit facilitating wide range dynamic tuning of oscillation period of pendulum, and power unit facilitating power take off from motion of vessel and pendulum.	GREGORY B	GREGORY B (GREG-Individual)	2012N64120	NOVELTY - The converter has a dynamically tunable pitching floating vessel pitching on a dominant swell. The vessel is provided with a tuning unit for facilitating wide range dynamic tuning of a pitching period of the vessel. A compact pendulum i.e. oscillating mass system, is contained in the vessel. The pendulum is provided with another tuning unit for facilitating wide range dynamic tuning of …	Q54 (Non-positive displacement fluid engines (i.e. driven by fluid); Miscellaneous motors and machines for producing mechanical power/thrust (F03B,D,G,H)); X15 (Non-Fossil Fuel Power Generating Systems)	X15-C01C	F03B-013/20; F03B-013/16; F03B-013/22	GB2490184-A 24 Oct 2012 F03B-013/20 201273 Pages: 23 English	GB2490184-A GB016881 30 Sep 2011	GB003508 01 Mar 2011	DIIDW:2012N64120
317	P	WO2019208835-A1; JP2021519884-W	Method of manufacturing wave energy conversion system, involves connecting turbine and turbine blades across area and configuring frame to have ports for connecting routing, storage, and energy consumption devices.	SHINTAKE T	OKINAWA INST SCI & TECHNOLOGY (OKIN-Non-standard)	201990422E	NOVELTY - The method involves accepting wave motion and channeling that motion into a turbine (104). A wave-facing portion of the frame shape is arranged to have an opening of a first area. A shore-facing portion of the frame shape is arranged to have an opening of a second area. The first area is larger than the second area. The panels and tapered surfaces are arranged according to predetermined…	A88 (Mechanical engineering and tools e.g. valves, gears and conveyor belts.); Q54 (Non-positive displacement fluid engines (i.e. driven by fluid); Miscellaneous motors and machines for producing mechanical power/thrust (F03B,D,G,H)); X15 (Non-Fossil Fuel Power Generating Systems)	A12-H; Q54-X; X15-C01; X15-C15	F03B-013/22	WO2019208835-A1 31 Oct 2019 F03B-013/22 201986 Pages: 65 English	WO2019208835-A1 WOJP018652 25 Apr 2019	US663392P 27 Apr 2018	DIIDW:201990422E
318	P	WO2016027026-A1; FR3025004-A1; FR3025004-B1	Facility for producing electrical energy by converting wave energy in stretch of water, has upstream structure to regulate frequency of vertical undulation of waves upstream of floatation body to resonance frequency of converter.	DUMORTIER C	DUMORTIER C (DUMO-Individual)	201612459T	NOVELTY - The facility (1) has a floatation body (2) that is arranged with a wave energy converter comprising a mobile element designed so as to oscillate vertically under the effect of vertical undulation of waves. An upstream structure (3) is submerged in a stretch of water and is positioned upstream of the floatation body in a direction of waves. The upstream structure is designed so as to reg…	Q54 (Non-positive displacement fluid engines (i.e. driven by fluid); Miscellaneous motors and machines for producing mechanical power/thrust (F03B,D,G,H)); X15 (Non-Fossil Fuel Power Generating Systems)	Q54-X; X15-C01	F03B-013/20; F03B-013/12	WO2016027026-A1 25 Feb 2016 F03B-013/20 201616 Pages: 22 French	WO2016027026-A1 WOFR052195 11 Aug 2015	FR057889 20 Aug 2014	DIIDW:201612459T
319	P	CN112431711-A; CN214304152-U	Water wave energy collecting device, has parallel plates arranged at intervals, and cavity between the parallel plates is divided into channels, and resonance amplitude reaches maximum value to realize water wave energy convergence.	TAO Z	UNIV GUILIN ELECTRONIC TECHNOLOGY (UYGE-C)	202123136W	NOVELTY - The device has a pair of parallel plates arranged at intervals. A cavity between the parallel plates is divided into a first channel (1) and a second channel (2). The parallel plates at two sides of the first channel are provided with a first convex structure that is arranged in a symmetrical type periodically. The parallel plates at two sides of the second channel are provided with a s…	Q54 (Non-positive displacement fluid engines (i.e. driven by fluid); Miscellaneous motors and machines for producing mechanical power/thrust (F03B,D,G,H)); X15 (Non-Fossil Fuel Power Generating Systems)	Q54-X; X15-C01	F03B-013/14	CN112431711-A 02 Mar 2021 F03B-013/14 202122 Pages: 9 Chinese	CN112431711-A CN11538928 23 Dec 2020	CN11538928 23 Dec 2020	DIIDW:202123136W
320	P	WO2017164803-A1; EP3433486-A1; EP3433486-A4	Power take-off device for wave energy converter for electricity generation, has transmission unit for engaging and disengaging flywheel to and from converting units for converting linear motion from movements of buoy into rotary motion.	SIDENMARK M	OCEAN HARVESTING TECHNOLOGIES AB (OCEA-Non-standard)	201767356A	NOVELTY - The device has converting units for converting linear motion from movements of a buoy (1) into rotary motion. A flywheel arrangement comprises a flywheel (6) and a transmission unit to engage and disengage the flywheel to and from the converting units for converting the linear motion from the movements of the buoy into the rotary motion. The flywheel is connected to a common shaft by th…	Q54 (Non-positive displacement fluid engines (i.e. driven by fluid); Miscellaneous motors and machines for producing mechanical power/thrust (F03B,D,G,H)); X11 (Power Generation and High Power Machines); X15 (Non-Fossil Fuel Power Generating Systems)	Q54-F; Q54-X; X11-B; X11-J05; X15-C01C	F03B-013/18; F03G-003/08; F03G-007/04; F03G-007/08	WO2017164803-A1 28 Sep 2017 F03B-013/18 201767 Pages: 26 English	WO2017164803-A1 WOSE050277 22 Mar 2017	SE050375 22 Mar 2016	DIIDW:201767356A
321	P	CA2634450-A1	Energy converting system for electrical power generation application, has sensing unit sensing physical features of oncoming waves, and displacement control for fluid flow through rotary hydraulic devices.	STROMOTICH F L	STROMOTICH F L (STRO-Individual)	2008N53145	NOVELTY - The system has a hydraulic fluid system provided with an accumulator and a fluid power transformer. A motor is coupled to another motor, and operated in a regenerative mode. A converting unit converts fluid energy to electric energy, and a transferring unit transfers the electric energy to a receiving device onshore. A control computer includes a sensing unit sensing physical features o…	Q54 (Non-positive displacement fluid engines (i.e. driven by fluid); Miscellaneous motors and machines for producing mechanical power/thrust (F03B,D,G,H)); S02 (Engineering Instrumentation); T01 (Digital Computers); X11 (Power Generation and High Power Machines); X15 (Non-Fossil Fuel Power Generating Systems)	S02-A02A; T01-J07B; X11-B; X15-C01	F03B-013/00; F03B-013/14; F03B-013/22	CA2634450-A1 30 Apr 2004 F03B-013/00 200879 Pages: 48 English	CA2634450-A1 CA2634450 30 Oct 2002	CA2408855 30 Oct 2002	DIIDW:2008N53145
322	P	CN108506151-A; CN108506151-B	Wave energy conversion device, has fixing plate connected with connecting rod, damping film placed between fixing plate and supporting ring and placed around fixing plate and supporting ring to form hollow round structure.	JI S	JI S (JISS-Individual)	2018723219	NOVELTY - The device has a floating ball (1) provided with an electric energy conversion device (12). An upper end of a connecting rod (11) is fixed on the floating ball and connected with the electric energy conversion device. A lower end of the connecting rod is provided with a plastic floater that is provided with a fixing plate (2) and a supporting ring (21). The fixing plate is connected wit…	A88 (Mechanical engineering and tools e.g. valves, gears and conveyor belts.); Q54 (Non-positive displacement fluid engines (i.e. driven by fluid); Miscellaneous motors and machines for producing mechanical power/thrust (F03B,D,G,H)); X15 (Non-Fossil Fuel Power Generating Systems)	A12-H; Q54-X; X15-C01	F03B-011/00; F03B-013/18	CN108506151-A 07 Sep 2018 F03B-013/18 201865 Pages: 5 Chinese	CN108506151-A CN10297465 04 Apr 2018	CN10297465 04 Apr 2018	DIIDW:2018723219
323	P	WO2017053395-A1; US2018202412-A1; US10738756-B2	Vertical axis unidirectional monolithic rotor for use in wave energy converter, has blades connected to rotor shaft by spokes and distributed in locations with respect to shaft, where rotor is configured for unidirectional rotation in waves.	YANG Y	YANG Y (YANG-Individual)	201722001V	NOVELTY - The rotor has a vertical rotor shaft (11) including a proximal end connected with a generator and a distal end opposite the proximal end. A set of blades (13) is connected to the rotor shaft by spokes (12) and distributed in various locations axially, radially and circumferentially with respect to the rotor shaft. The rotor is configured for unidirectional rotation in waves. The blades …	Q25 (Aircraft, aviation, cosmonautics (B64)); Q52 (Reaction engines: external combustion; gas turbines; rockets (F01D, F02C, F02K, F02M)); Q54 (Non-positive displacement fluid engines (i.e. driven by fluid); Miscellaneous motors and machines for producing mechanical power/thrust (F03B,D,G,H)); X15 (Non-Fossil Fuel Power Generating Systems)	Q25-P02; Q52-A02A; Q54-G; Q54-X; X15-B01A6; X15-C01	B64C-027/20; F01D-005/14; F03B-013/00; F03B-013/20; F03D-003/00; F03B-013/10; F03B-013/18	WO2017053395-A1 30 Mar 2017 F03B-013/20 201725 Pages: 46 English	WO2017053395-A1 WOUS052837 21 Sep 2016	US221482P 21 Sep 2015	DIIDW:201722001V
324	P	US2022403811-A1; US11815060-B2	Ocean wave energy converter device, has mass configured to apply strain to set of elastomer generators when device is subjected to stress from wave, where strain on set of elastomer generators results in generation of electrical energy.	WEBER J	ALLIANCE SUSTAINABLE ENERGY LLC (ALLU-C)	2022F60596	NOVELTY - The device has a hull provided with an interior and an exterior. A lattice is provided with a set of elastomer generators e.g. Ionic dielectric elastomer generator (220) and layered reinforced dielectric elastomer generators (230), and positioned in the interior. A mass is located in the interior. The mass is configured to apply a strain to the set of the elastomer generators when the d…	A88 (Mechanical engineering and tools e.g. valves, gears and conveyor belts.); Q54 (Non-positive displacement fluid engines (i.e. driven by fluid); Miscellaneous motors and machines for producing mechanical power/thrust (F03B,D,G,H)); X15 (Non-Fossil Fuel Power Generating Systems)	A12-S08D2; A12-S08B; A12-E08B; A05-G01E2; A04-B08; Q54-X; X15-C01	F03B-013/18	US2022403811-A1 22 Dec 2022 F03B-013/18 202303 English	US2022403811-A1 US851418 28 Jun 2022	US888685P 19 Aug 2019	DIIDW:2022F60596
325	P	AU2022256200-A1	Dual floats based wave energy convertor (DFBWEC) for generating differential motion of rotor and stator of generator, has mechanical power transmission system or pressurized fluid system that provided to transfer energy harvested from vertical differential motions between SFP and VSF to drive shaft.	LAM T T	LAM T T (LAMT-Individual)	2022E5503T	NOVELTY - The DFBWEC has a structural floating post (SFP) (5) which is also a shaft of the DFBWEC. A stationed rope (2) made of ropes, cables or chains. A submerged damper (1) is hung to a bottom of the SFP through the stationed rope or the bottom of the SFP being anchored downward to ground through the stationed rope. A stationed float (3) is secured to the SFP. A vertically slidable float (VSF)…	W06 (Aviation, Marine and Radar Systems); X15 (Non-Fossil Fuel Power Generating Systems)	W06-C01; W06-C15G; X15-B01A; X15-B01B; X15-C01; X15-X	B63B-035/44; F03B-013/12; F03B-017/06; F03D-013/25; F03D-009/00; F03G-007/10; F16H-019/06; F16H-019/08; F16H-041/02	AU2022256200-A1 24 Nov 2022 F03G-007/10 202200 Pages: 21 English	AU2022256200-A1 AU256200 21 Oct 2022	AU218536 17 Aug 2022	DIIDW:2022E5503T
326	P	RO82788-A	Tidal wave energy converter - has parallel sloped front and rear walls curved under water surface, and vertical side walls.		INST STIINT ING TEH (STII-C)	1984144219		Q55 (Positive displacement fluid machines/pumps/compressors (i.e. for driving fluid) (F04B,C)); X15 (Non-Fossil Fuel Power Generating Systems)	X15-C02	F03B-013/12	RO82788-A 30 Oct 1983 F03B-013/12 198423 Romanian		RO110551 05 Apr 1983	DIIDW:1984144219
327	P	TW439098-U	Wave energy converter.	LIN C	UNIV NAT TAIWAN OCEAN (UYTA-Non-standard)	2013D46931		Q54 (Non-positive displacement fluid engines (i.e. driven by fluid); Miscellaneous motors and machines for producing mechanical power/thrust (F03B,D,G,H)); X15 (Non-Fossil Fuel Power Generating Systems)	X15-C01	F03B-013/14	TW439098-U 11 Oct 2012 F03B-013/14 201320 Pages: 0 Chinese	TW439098-U TW207211 18 Apr 2012	TW207211 18 Apr 2012	DIIDW:2013D46931
328	P	US2022364541-A1	Wave energy converter for converting kinetic energy of incoming wave on body of water to electrical energy, has tank in floater included with vertical columns, and motion of volume of fluid between columns via conduit causes air to be released or admitted via turbine to generate electrical power.	BRIZZOLARA S	VIRGINIA TECH INTELLECTUAL PROPERTIES (VIRG-C)	2022E2586W	NOVELTY - The converter (100) has a floater (103) that is buoyant in a body of water and provided with a geometry, such that the floater pitches in the angular motion about the transverse axis in response to an incoming wave in the body of water. A tank (104) in the floater is included with the vertical columns (106a, 106b), where one of the vertical columns includes an air turbine (118a, 118b). …	Q54 (Non-positive displacement fluid engines (i.e. driven by fluid); Miscellaneous motors and machines for producing mechanical power/thrust (F03B,D,G,H)); X15 (Non-Fossil Fuel Power Generating Systems)	Q54-X; X15-C01	F03B-013/14; F03B-013/24	US2022364541-A1 17 Nov 2022 F03B-013/14 202296 English	US2022364541-A1 US662355 06 May 2022	US184888P 06 May 2021	DIIDW:2022E2586W
329	P	IN201711035700-A	Device for capturing sea wave energy for non-submersible sea wave energy conversion device installed in seaside for industrial applications, has wire rope which is connected with generator or power take off (PTO).	DHARMALINGAM G B	COUNCIL SCI & IND RES INDIA (COUI-C)	2019360864	NOVELTY - The device has two high-rise pillars (1) that are placed in offshore and anchored to a seafloor at a depth of not less than one meter. A pendulum (3) is suspended in the pillars in pendulum hanging points, and is comprised of stabilizing rims, a wave facing plate (WFP), several coupling knobs and an extending rim. The WFP swings in a same direction when struck by the waves while pulling…	Q54 (Non-positive displacement fluid engines (i.e. driven by fluid); Miscellaneous motors and machines for producing mechanical power/thrust (F03B,D,G,H)); X15 (Non-Fossil Fuel Power Generating Systems)	Q54-X; X15-C01B2; X15-C01C	F03B-013/12	IN201711035700-A 12 Apr 2019 F03B-013/12 201931 Pages: 24 English	IN201711035700-A IN11035700 09 Oct 2017	IN11035700 09 Oct 2017	DIIDW:2019360864
330	P	GB2512110-A; GB2512110-B	Wave energy conversion system for capturing energy from waves propagating on surface of water, has paddle partially arranged in water such that waves propagating on surface of water impinges first face oriented at right angle.	ELOGAB O	ELOGAB O (ELOG-Individual)	2014T34257	NOVELTY - The system (100) has a support structure, securable in a fixed position relative to land. A paddle (130) is pivotally mounted on the support structure about a first axis. An energy transfer system (210) is coupled to the paddle to convey oscillatory motion of the paddle to an electrical energy generation unit (200). The paddle is partially arranged in water such that waves propagating o…	Q54 (Non-positive displacement fluid engines (i.e. driven by fluid); Miscellaneous motors and machines for producing mechanical power/thrust (F03B,D,G,H)); X15 (Non-Fossil Fuel Power Generating Systems)	X15-C01	F03B-013/18	GB2512110-A 24 Sep 2014 F03B-013/18 201469 Pages: 27 English	GB2512110-A GB005162 21 Mar 2013	GB005162 21 Mar 2013	DIIDW:2014T34257
331	P	CN201714562-U	Wave energy converter, has gear shaft is installed between two gear plates on gear shaft bracket, and negative gear plate equipped with negative guide groove that is formed in rocker arm fork by negative pushing force.	XU H	XU H (XUHH-Individual)	2011C85784	NOVELTY - The converter has a rocker arm fixed at an end of a rocker arm fork connected to a floating force body by a floating shaft, where a middle end of the rocker arm fork is connected to a rocker arm bracket by a rocker arm shaft. A gear shaft is installed between two gear plates on a gear shaft bracket. A positive gear plate is equipped with a positive guide groove that is formed in the roc…	Q54 (Non-positive displacement fluid engines (i.e. driven by fluid); Miscellaneous motors and machines for producing mechanical power/thrust (F03B,D,G,H)); X15 (Non-Fossil Fuel Power Generating Systems)	X15-C01	F03B-013/16	CN201714562-U 19 Jan 2011 F03B-013/16 201123 Pages: 4 Chinese	CN201714562-U CN20145217 24 Mar 2010	CN20145217 24 Mar 2010	DIIDW:2011C85784
332	P	DK201470168-A; DK178143-B; WO2015149806-A1	System for pumping fluid on water body, has hydraulic wave energy converters comprising gas controlled hydraulic accumulator assembly for performing stepless power regulation of hydraulically driven power generator.	AAVARD F	FAATEK APS (FAAT-Non-standard)	2015404052	NOVELTY - The system has hydraulic wave energy converters comprising a gas controlled hydraulic accumulator assembly for performing a stepless power regulation of a hydraulically driven power generator.	Q54 (Non-positive displacement fluid engines (i.e. driven by fluid); Miscellaneous motors and machines for producing mechanical power/thrust (F03B,D,G,H)); X15 (Non-Fossil Fuel Power Generating Systems)	X15-C01	F03B-013/18; F03B-013/16	DK201470168-A 29 Jun 2015 F03B-013/18 201550 Pages: 1 English	DK201470168-A DK070168 03 Apr 2014	DK070168 03 Apr 2014	DIIDW:2015404052
333	P	US2018058420-A1; WO2018039128-A1; WO2018039128-A9; AU2017316567-A1; GB2567997-A; US10385820-B2; ZA201901291-A; AU2017316567-B2; GB2567997-B; AU2022200880-A1; NZ751168-A2; NZ790168-A2	Venturi tube wave energy converter for electrical power generation applications, has set of connectors extending from generator to energy receptor unit on flotation module for transferring electrical energy from generator.	MOFFAT B L	MOFFAT B L (MOFF-Individual)	201816701B	NOVELTY - The converter has a hydraulic kinetic element placed proximal to constriction of a fluid conducting tube. A submerged pod is spaced from a flotation module, and includes an interior occupied by a non-corrosive environment. A generator is placed within the interior of the submerged pod. A linkage transfers kinetic energy at the hydraulic kinetic element to the generator. A set of connect…	Q54 (Non-positive displacement fluid engines (i.e. driven by fluid); Miscellaneous motors and machines for producing mechanical power/thrust (F03B,D,G,H)); X11 (Power Generation and High Power Machines); X15 (Non-Fossil Fuel Power Generating Systems)	Q54-X; X11-B01; X11-J07X1; X15-C01	F03B-011/02; F03B-013/10; F03B-013/22; F03B-013/00; F03B-013/12; F03B-013/18; F03B-000/00	US2018058420-A1 01 Mar 2018 F03B-013/22 201817 Pages: 112 English	US2018058420-A1 US681118 18 Aug 2017	US377679P 22 Aug 2016	DIIDW:201816701B
334	P	KR2014039386-A; KR1386251-B1	Apparatus for controlling motion of floating object in wave energy converter, has pumped hydraulic cylinder that is set with operating module according to relative motion between stern and player structures for getting angular velocity.	PARK B C	KOREA ELECTRIC POWER CORP (KEPC-C)	2014G12502	NOVELTY - The apparatus causes relative motion from saved relative angle. The relative angle between stern structure (102) and player structure (101) is computed for differentiating computed relative angle. The pumped hydraulic cylinder (103) is set with operating module (110) according to the relative motion between the stern structure and the player structure for getting the angular velocity. T…	Q54 (Non-positive displacement fluid engines (i.e. driven by fluid); Miscellaneous motors and machines for producing mechanical power/thrust (F03B,D,G,H)); X15 (Non-Fossil Fuel Power Generating Systems)	X15-C01C; X15-C03	F03B-013/16; F03B-015/00	KR2014039386-A 02 Apr 2014 F03B-013/16 201428 Pages: 15	KR2014039386-A KR104776 20 Sep 2012	KR104776 20 Sep 2012	DIIDW:2014G12502
335	P	GE201305795-B	Wave energy converter, has piston rod whose end is rigidly connected with float and anther end is fixed with spherical hinge, where spherical hinge is fixed in twisting springs and springs limit slider by turning levers.	TENGIZ N	TENGIZ N (TENG-Individual)	201931341L	NOVELTY - The converter has a piston rod whose end is rigidly connected with a float and anther end is fixed with a spherical hinge. The spherical hinge is connected with a slider. The spherical hinge is fixed in twisting springs by two levers. A slider is hingedly connected with a pump and the piston rod. The springs are arranged with each other. Ends of the springs are connected with the piston…	Q54 (Non-positive displacement fluid engines (i.e. driven by fluid); Miscellaneous motors and machines for producing mechanical power/thrust (F03B,D,G,H)); X15 (Non-Fossil Fuel Power Generating Systems)	Q54-X; X15-C01	F03B-013/14; F03B-013/22	GE201305795-B 25 Mar 2013 F03B-013/14 201930 Pages: 1 Russian	GE201305795-B GE012176 08 Apr 2011	GE012176 08 Apr 2011	DIIDW:201931341L
336	P	WO9741350-A1; SE9601638-A; ZA9703579-A; AU9727212-A; SE508307-C2; EP897472-A1; CN1217046-A; AU708155-B; JP2000509129-W; NZ332539-A; US6140712-A; EP897472-B1; ES2167742-T3; CN1077233-C; IN9701098-I1; IN220142-B	Wave energy converter, e.g. point absorber or heaving-buoy wave energy converter uses piston inside cylinder through which water flows with energy absorbing hose pumps.	SJOESTROEM B	IPS INTERPROJECT SERVICE AB (IPSI-Non-standard)	1997549827	The wave energy converter comprises a buoyant body (11) and an acceleration tube dependent from and attached to the buoyant body. A section of the acceleration tube between the upper and lower ends defines a working cylinder (16) with openings above and below it to allow an unobstructed flow of water between the cylinder and the body of water in which the acceleration tube is immersed.	Q55 (Positive displacement fluid machines/pumps/compressors (i.e. for driving fluid) (F04B,C)); X15 (Non-Fossil Fuel Power Generating Systems)	X15-C01	F03B-013/20; F03B-000/00; F03B-013/12	WO9741350-A1 06 Nov 1997 F03B-013/20 199750 Pages: 11 English	WO9741350-A1 WOSE00719 29 Apr 1997	SE001638 29 Apr 1996	DIIDW:1997549827
337	P	WO2015157528-A1; US2015292472-A1; CA2945357-A1; AU2015243499-A1; KR2016143756-A; EP3129642-A1; CN106460776-A; SG11201608457-A1; JP2017510755-W; US9709142-B2; US2017314658-A1; EP3129642-A4; US10030747-B2	Wave energy conversion system for converting energy from wave patterns in electrical energy, has multi-radius energy transmission mechanism in mechanical communication with pod and transmits variable torque over range of motion.	MARAMARA R	BRIMES ENERGY INC (BRIM-Non-standard)	201563056W	NOVELTY - The wave energy conversion system (100) has a pod (120) rotatably supported by a platform structure (110). A multi-radius energy transmission mechanism is in mechanical communication with the pod. The multi-radius energy transmission mechanism configured to transmit a variable torque over a range of motion. An electrical generating device is mechanical communication with the multi-radiu…	Q54 (Non-positive displacement fluid engines (i.e. driven by fluid); Miscellaneous motors and machines for producing mechanical power/thrust (F03B,D,G,H)); X15 (Non-Fossil Fuel Power Generating Systems)	X15-C01	F03B-013/16; F03B-013/22; F03B-013/14; F16H-035/00; F03B-013/18; F03B-013/20	WO2015157528-A1 15 Oct 2015 F03B-013/16 201572 Pages: 50 English	WO2015157528-A1 WOUS025134 09 Apr 2015	US977371P 09 Apr 2014	DIIDW:201563056W
338	P	US8097150-B1	Wave energy conversion system for use with power generation pumping system on e.g. sea to convert wave energy into pumping energy for producing e.g. electric power, has toroidal buoyancy vessel carried by pressure conduit.	HOUSER D F	HOUSER D F (HOUS-Individual)	2012A88167	NOVELTY - The system (1) has a pressure conduit displaced on a water transfer conduit (32). The pressure conduit has a cylindrical inner barrel arranged in a cylindrical outer barrel and surrounding the transfer conduit, and an outer water transfer space defined between the inner barrel and the transfer conduit and placed in fluid communication with an inner water transfer space. An annular balla…	J01 (Separation - including evaporation, crystallisation, solvent extraction, chromatography, dialysis, osmosis including drying gases and/or vapours, and separation of solids from gases, liquids and other solids. Isotope separation, filter materials (including molecular sieves for separation), and centrifuges (except where used for analysis) (B01D, B03, B04, B07B).); W06 (Aviation, Marine and Ra…	J01-F02D; J01-F02X1; W06-C01B; W06-C01C; X15-C01A1	B01D-035/153; B63B-035/00; F04B-017/00	US8097150-B1 17 Jan 2012 B01D-035/153 201208 Pages: 13 English	US8097150-B1 US316392 12 Dec 2008	US316392 12 Dec 2008	DIIDW:2012A88167
339	P	EP3324037-A2; EP3324037-A3	Power take-off device for use in wave energy converter, has component that converts linear motion from movements of buoy into rotary motion with elongated components and rotary devices interacting with elongated components.	SIDENMARK M	OCEAN HARVESTING TECHNOLOGIES AB (OCEA-Non-standard)	201839937R	NOVELTY - The device has a buoy (1) and a component for converting linear motion from movements of the buoy into rotary motion with an elongated component (2) and rotary devices interacting with the elongated component. A component for applying an essentially constant pre-tension force on the buoy, connected to a rotary device, and a component for applying a variable damping force on the buoy con…	Q54 (Non-positive displacement fluid engines (i.e. driven by fluid); Miscellaneous motors and machines for producing mechanical power/thrust (F03B,D,G,H)); X15 (Non-Fossil Fuel Power Generating Systems)	Q54-X; X15-C01C	F03B-013/18	EP3324037-A2 23 May 2018 F03B-013/18 201836 Pages: 32 English	EP3324037-A2 EP199385 31 Oct 2017	SE051434 31 Oct 2016	DIIDW:201839937R
340	P	TW201829906-A	Wave energy converting system includes loading block disposed on bottom of fluid.	HSU S	HSU S (HSUS-Individual)	201885729F	NOVELTY - A wave energy converting system includes a body, a first loading block, a first plumb, a first connecting member, first power generating device and a first wheel group. The body floats on a fluid. The first loading block is fixedly disposed on a bottom of the fluid. The first plumb is disposed in the fluid. The first connecting member is connected to the first loading block and the firs…	X15 (Non-Fossil Fuel Power Generating Systems)	X15-C01	F03B-013/14	TW201829906-A 16 Aug 2018 F03B-013/14 201924 Pages: 28 Chinese	TW201829906-A TW104373 10 Feb 2017	TW104373 10 Feb 2017	DIIDW:201885729F
341	P	GB2586643-A; WO2021038248-A1; AU2020337010-A1; CN114555933-A; EP4022185-A1; US2022290647-A1; EP4022185-B1	Drive assembly for use with buoyant wave energy converting apparatus, has actuating element arranged to rotate lever arm about fulcrum between stroke positions to define distal end points of working stroke to drive energy converter.	FOSTER G	MARINE POWER SYSTEMS LTD (MARI-Non-standard)	202124883L	NOVELTY - The drive assembly (102) comprises a wave energy capturing element (126), an actuating element (142) in communication with the wave energy capturing element, and arranged to transfer energy from the wave energy capturing element. A rotatable lever arm (128) is coupled to the actuating element, and is rotatable about a fulcrum to define a rotation arc. The lever arm is arranged to be cou…	Q54 (Non-positive displacement fluid engines (i.e. driven by fluid); Miscellaneous motors and machines for producing mechanical power/thrust (F03B,D,G,H)); X15 (Non-Fossil Fuel Power Generating Systems)	Q54-X; X15-C01	F03B-013/10; F03B-013/16; F03B-013/20; B63B-021/50; B63B-035/44; F03B-013/18	GB2586643-A 03 Mar 2021 F03B-013/16 202123 English	GB2586643-A GB012525 30 Aug 2019	GB012525 30 Aug 2019	DIIDW:202124883L
342	P	NO201700347-A; NO342615-B1; WO2018164583-A1	Energy harvesting buoy.	WESTBY T	WESTBY T (WEST-Individual)	201854687U	NOVELTY - The buoy (10) has a wave energy converter (20) comprising a translator (40) provided helically shaped permanent magnets (42). The translator is arranged movable in a sleeve (30) extending vertically in a float (11). A generator unit (50) is fixed in the float comprising a rotor assembly enclosing the translator. A stator assembly encloses the rotor assembly. The helically shaped permane…	Q54 (Non-positive displacement fluid engines (i.e. driven by fluid); Miscellaneous motors and machines for producing mechanical power/thrust (F03B,D,G,H)); V06 (Electromechanical Transducers and Small Machines); X11 (Power Generation and High Power Machines); X15 (Non-Fossil Fuel Power Generating Systems)	Q54-X; V06-M04; V06-M10; X11-B; X11-J05B; X15-C01; V06-M06; X11-B01; X11-G; X11-H03A; X11-J05X	F03B-013/18; F03B-013/20; F03B-013/12; H02K-035/02; H02K-035/04; H02K-007/18; H02K-049/10; H02K-007/06	NO201700347-A 18 Jun 2018 F03B-013/18 201848 Pages: 1 Portuguese	NO201700347-A NO000347 09 Mar 2017	NO000347 09 Mar 2017	DIIDW:201854687U
343	P	US2011304145-A1; US8084877-B1; WO2012172535-A1; AU2011371176-A1; EP2951427-A1	Wave energy conversion device for producing electrical energy, has chain having one end attached to small floatation element and other end attached to anchor and rotating lower wheel assembly of large floatation element.	RAISCH N	RAISCH N (RAIS-Individual)	2011Q40069	NOVELTY - The wave energy conversion device has a large floatation element having an upper wheel assembly and a lower wheel assembly below water level during the operation of conversion device. A small floatation element is moved independent of the large floatation element. A chain has one end attached to the small floatation element and adapted to rotate lower wheel assembly and transfer change …	Q54 (Non-positive displacement fluid engines (i.e. driven by fluid); Miscellaneous motors and machines for producing mechanical power/thrust (F03B,D,G,H)); X15 (Non-Fossil Fuel Power Generating Systems)	X15-C01	F03B-013/18; F03B-013/20	US2011304145-A1 15 Dec 2011 F03B-013/18 201202 Pages: 23 English	US2011304145-A1 US159419 14 Jun 2011	US159419 14 Jun 2011	DIIDW:2011Q40069
344	P	WO2006113855-A2; GB2443101-A; US2008309088-A1; GB2443101-B; WO2006113855-A3	Conversion system for transforming wave motion to rotary motion, moves primary component magnetically coupled to secondary component so that linear motion in response to waves is converted to rotary motion.	AGAMLOH E	UNIV OREGON STATE (UORE-C)	2007091338	NOVELTY - A primary component has overall buoyancy relative to the liquid. A secondary component is slidably coupled to the primary component. One or more screw is rotatably supported by the secondary component. The primary component is configured to slide relative to secondary component in response to force from waves that is exerted on primary component. Primary component is magnetically couple…	Q54 (Non-positive displacement fluid engines (i.e. driven by fluid); Miscellaneous motors and machines for producing mechanical power/thrust (F03B,D,G,H)); X15 (Non-Fossil Fuel Power Generating Systems)	X15-C01	F03B-013/10; F03B-013/18; H02K-035/02; H02K-007/18	WO2006113855-A2 26 Oct 2006 F03B-013/10 200709 Pages: 42 English	WO2006113855-A2 WOUS014848 19 Apr 2006	US673209P 19 Apr 2005	DIIDW:2007091338
345	P	US2015226175-A1; KR2015093338-A; US9518556-B2; KR1800494-B1	Apparatus for converting wave energy based on oscillating water column type used in oscillating water column type wave energy converting system, has turbine is rotated by air according to changes in water level inside hollow of post.	SONG S K	SONG S K (SONG-Individual)	201546425P	NOVELTY - The apparatus has a damping plate (140) that is connected to a mooring device (205). A post (120) with a hollow of which both ends are open, and is provided for extending vertically upwards from the mooring device. A turbine (130) is placed inside the hollow of the post. Housing (110) is placed at an upper portion of the post. The turbine is rotated by air that flows according to change…	Q52 (Reaction engines: external combustion; gas turbines; rockets (F01D, F02C, F02K, F02M)); Q54 (Non-positive displacement fluid engines (i.e. driven by fluid); Miscellaneous motors and machines for producing mechanical power/thrust (F03B,D,G,H)); X15 (Non-Fossil Fuel Power Generating Systems)	X15-C01	F01D-015/10; F03B-013/14; F03B-013/24; F03B-013/20; F16D-031/02	US2015226175-A1 13 Aug 2015 F03B-013/14 201555 Pages: 31 English	US2015226175-A1 US226836 27 Mar 2014	KR013970 07 Feb 2014	DIIDW:201546425P
346	P	IN201921035446-A	Crescent wave energy converter has two surfaces (a) and (b) in which upper side of surface (a) and lower side of surface (b) are connected by circular plate having surface (c) which reduces friction between water and the converter.	VERULKAR K	VERULKAR K (VERU-Individual)	202126054G	NOVELTY - A crescent wave energy converter comprises two surfaces (a) and (b) which are at 135 degrees apart from each other, where upper side of surface (a) and lower side of surface (b) are connected by a circular plate having surface (c), which provides support to surfaces (a) and (b) and reduce the friction between water and the converter.	D15 (Chemical or biological treatment of water, industrial waste and sewage - including purification, sterilising or testing water, scale prevention, treatment of sewage sludge, regeneration of active carbon which has been used for water treatment and impregnating water with gas e.g. CO2, but excluding plant and anti-pollution devices (C02).); Q54 (Non-positive displacement fluid engines (i.e. dr…	D04-A01; Q54-G; Q54-X; X15-B01B; X15-C01	C02F-001/44; F03B-013/18; F03B-017/06; F03D-009/11; H02N-002/18	IN201921035446-A 05 Mar 2021 F03B-013/18 202143 Pages: 15 English	IN201921035446-A IN21035446 03 Sep 2019	IN21035446 03 Sep 2019	DIIDW:202126054G
347	P	PT109979-A1	Wave energy conversion devices comprises external buoys, which act independently and allow the capture of the energy associated with the movement of the free wheels and the conical wheels with the upward or downward movement of the waves.	BARATA DA ROCHA A D C	AUGUSTO DUARTE CAMPOS BARATA DA ROCHA (AUGU-Non-standard)	201888482Q	NOVELTY - The wave energy conversion device comprises external buoys, which act independently and allow the capture of the energy associated with the movement of the free wheels and the conical wheels with the upward or downward movement of the waves. The external buoy moves with the driving of the conical wheels through free wheels. The movement of external buoy is transmitted to a central sproc…	Q54 (Non-positive displacement fluid engines (i.e. driven by fluid); Miscellaneous motors and machines for producing mechanical power/thrust (F03B,D,G,H)); X15 (Non-Fossil Fuel Power Generating Systems)	Q54-X; X15-C01	F03B-013/18; F03B-013/20	PT109979-A1 20 Sep 2018 F03B-013/18 201878 Pages: 1	PT109979-A1 PT109979 20 Mar 2017	PT109979 20 Mar 2017	DIIDW:201888482Q
348	P	WO2023275666-A1; GB2608387-A	Energy converter for converting energy of ocean waves into electrical energy, has wave energy conversion devices that are mounted around portion of peripheral edge region and configured to exhibit roll movement and pitch movement.	SOLHEIM G A	HAVKRAFT AS (HAVK-Non-standard)	202302809Q	NOVELTY - The converter (300) has wave energy conversion devices (306) implemented for converting an energy of ocean waves received thereat into electrical energy. A buoyant platform (304) has a peripheral edge region. The wave energy conversion devices are mounted around a portion of the peripheral edge region. The buoyant platform together with wave energy conversion devices are configured to e…	Q54 (Non-positive displacement fluid engines (i.e. driven by fluid); Miscellaneous motors and machines for producing mechanical power/thrust (F03B,D,G,H)); X15 (Non-Fossil Fuel Power Generating Systems)	Q54-X; X15-C01A1	F03B-013/14; F03B-013/24	WO2023275666-A1 05 Jan 2023 F03B-013/14 202306 Pages: 62 English	WO2023275666-A1 WOIB055702 20 Jun 2022	GB009348 29 Jun 2021	DIIDW:202302809Q
349	P	FR2548739-A	Wave energy conversion installation using artificial shore - uses sloping artificial shore with collection chamber behind to capture wave energy for electricity generation.	ALPHONSE J	LIAUTAUD J A (LIAU-Individual)	1985045773	The wave energy conversion installation has a sloping artificial shore (4) carried on a semi-submersible structure and fixed to a collection reservoir (11) which supplies, through conduits, turbine-generator units (19) carried above the water level. The height of both the artificial shore (4) and the reservoir (11) behind the 'shore' are adjustable relative to the support structure by sliders (13…	Q24 (Ships; waterborne vessels; related equipment (B63)); Q55 (Positive displacement fluid machines/pumps/compressors (i.e. for driving fluid) (F04B,C)); X15 (Non-Fossil Fuel Power Generating Systems)	X15-C01	F03B-013/22; B63B-035/44	FR2548739-A 11 Jan 1985 F03B-013/22 198508 Pages: 6 French	FR2548739-A FR011321 07 Jul 1983	FR011321 07 Jul 1983	DIIDW:1985045773
350	P	WO2014162037-A1; EP2981705-A1; US2016040647-A1; EP2981705-A4; EP2981705-B1	Submersible wave energy conversion unit for converting wave energy of sea water into electricity, has panel whose lower edge is hinged onto stationary stand, and power-take-off machinery placed at inner side of panel.	JAERVINEN A	AW-ENERGY OY (AWEN-Non-standard)	2014S14920	NOVELTY - The conversion unit has a panel (1) whose lower edge is hinged onto a stationary stand (2) to make reciprocating motion in response to kinetic energy of waves or tidal currents. A power-take-off (PTO) machinery (17) is placed at an inner side of the panel. The panel comprises a shaft element (8) comprising a dry space arranged at the inner side of the panel. The PTO machinery contains w…	Q54 (Non-positive displacement fluid engines (i.e. driven by fluid); Miscellaneous motors and machines for producing mechanical power/thrust (F03B,D,G,H)); X15 (Non-Fossil Fuel Power Generating Systems)	X15-C01	F03B-013/18; F03B-011/02	WO2014162037-A1 09 Oct 2014 F03B-013/18 201468 Pages: 22 English	WO2014162037-A1 WOFI050376 05 Apr 2013	EP880965 05 Apr 2013	DIIDW:2014S14920
351	P	WO9402737-A1; AU9341772-A	Wave energy converter - has support frame with vertically moving carriage, levers with interconnected float assemblies, counterweights and linked ram pump or generator.	PACKER B	PACKER B (PACK-Individual)	1994048956	A support frame (1) has upright piles (2) which hold a carriage (3). Levers (or pendulums) (5,6) have floats (7,8) attached to one of their ends and weights (11) to the other. A forward and upward adjustment mechanism (9) is connected between the levers.	Q55 (Positive displacement fluid machines/pumps/compressors (i.e. for driving fluid) (F04B,C)); X15 (Non-Fossil Fuel Power Generating Systems)	X15-C01	F03B-013/18; F03B-013/14; E02B-009/08	WO9402737-A1 03 Feb 1994 F03B-013/18 199406 Pages: 11 English	WO9402737-A1 WOAU00343 12 Jul 1993	AU003519 15 Jul 1992	DIIDW:1994048956
352	P	FR2540567-A	Electric generation system using wave energy conversion - has float housing electric generation and storage plant driven by motion of float past anchored chain.	MONANGE J	MONANGE J (MONA-Individual)	1984227006	The wave energy converter uses a large hollow float housing one or more direct current generators. The generators are driven through step-up gearing from a drive shaft carried in bearings fixed in the lower part of the float and having a sprocket fixed to it to mesh with drive chains.	Q55 (Positive displacement fluid machines/pumps/compressors (i.e. for driving fluid) (F04B,C)); X15 (Non-Fossil Fuel Power Generating Systems)	X15-C01	F03B-013/12	FR2540567-A 10 Aug 1984 F03B-013/12 198437 Pages: 11 French	FR2540567-A FR002093 08 Feb 1983	FR002093 08 Feb 1983	DIIDW:1984227006
353	P	MD1185-Z; MD1185-Y	Wave energy conversion plant, has rod whose upper and lower parts are connected with socket in which ball is located, and bushes whose inner cylindrical surfaces are formed with helical groove along left and right directions.	BOSTAN V	UNIV MOLDOVA TECH (UYMO-Non-standard)	201921381N	NOVELTY - The plant has a frame whose inner side is vertically located on a rod. An upper end of the rod is fixed with a floating body along a right direction. A lower part of a rod is formed with a helical groove along a left direction. A ball is located in socket, which is connected with a main body by overrunning clutches. A frame is connected to a precession multiplier and an electric generat…	Q54 (Non-positive displacement fluid engines (i.e. driven by fluid); Miscellaneous motors and machines for producing mechanical power/thrust (F03B,D,G,H)); X15 (Non-Fossil Fuel Power Generating Systems)	Q54-X; X15-C01	F03B-013/12; F03B-013/16; F03B-013/18	MD1185-Z 31 Mar 2018 F03B-013/12 201920 Pages: 1 Russian	MD1185-Z MD000016 10 Feb 2017	MD000016 10 Feb 2017	DIIDW:201921381N
[truncated: 652 more rows]
